# Supplementary material for: Spaceflight Enhances Cell Aggregation and Random Budding in Candida albicans
Source: PLOS journal article supplement (doi:10.1371/journal.pone.0080677), 2013-12-04
Supplement: S2 (10.1371/journal.pone.0080677.s002) [file journal.pone.0080677.s002]

Percent survival

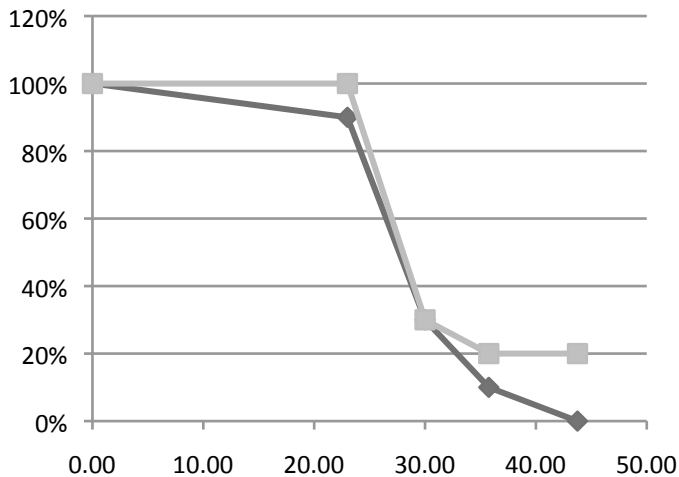

Hours post-infection

Ground  
Flight
