# Supplementary material for: Spaceflight Enhances Cell Aggregation and Random Budding in Candida albicans
Source: PLoS One. 2013 Dec 4;8(12):e80677. doi: 10.1371/journal.pone.0080677 (PMC3851762; doi:10.1371/journal.pone.0080677)
Supplement: Table S1 — Surface area, width and length measurements of C. albicans grown in spaceflight and ground control conditions. (XLS) [file pone.0080677.s003.xls]

## Sheet: Candida grnd flt raw data
Candida albicans ground vs. flight
Candida Ground 2500xE			length	width		Candida Flight 2500xD2			length	width
	Label on image	Area (µm2)	Major (µm)	Minor (µm)			Label on image	Area (µm2)	Major (µm)	Minor (µm)
	1	6.249	3.007	2.646			1	8.249	3.353	3.132
	2	14.834	5.302	3.562			2	5.604	2.765	2.58
	3	12.657	4.891	3.295			3	3.124	2.73	1.457
	4	10.527	4.135	3.241			4	2.982	2.354	1.613
	5	9.959	4.294	2.953			5	4.32	2.959	1.859
	6	11.349	4.107	3.518			6	5.751	3.455	2.119
	7	10.391	4.188	3.159			7	6.686	3.993	2.132
	8	10.893	3.922	3.536			8	8.669	3.831	2.881
	9	9.858	3.86	3.252			9	12.728	4.614	3.512
	10	7.314	3.194	2.916			10	8.018	3.6	2.836
	11	7.775	3.185	3.108			11	16.414	6.045	3.457
	12	7.408	3.373	2.796			12	13.219	4.706	3.576
	13	10.195	4.129	3.144			13	9.243	4.067	2.893
	14	7.077	3.325	2.71			14	8.083	3.847	2.675
	15	7.379	3.389	2.772			15	8.734	3.689	3.014
	16	6.728	3.788	2.262			16	9.568	4.864	2.504
	17	7.598	3.216	3.008			17	13.781	5.24	3.348
	18	8.704	3.68	3.011			18	7.982	3.523	2.884
	19	1.45	1.46	1.264			19	7.994	3.912	2.602
	20	6.941	3.036	2.911			20	8.604	4.07	2.691
	21	4.917	2.634	2.377			21	8.207	4.043	2.585
	22	5.544	3.514	2.009			22	9.964	5.139	2.469
	23	6.325	3.056	2.635			23	10.059	4.224	3.032
	24	8.917	3.767	3.014			24	5.047	2.773	2.318
	25	6.988	3.081	2.888			25	9.302	3.814	3.105
	26	5.237	2.738	2.435			26	5.905	3.356	2.24
	27	2.947	2.096	1.79			27	6.491	3.174	2.604
	28	3.124	2.099	1.896			28	6.414	3.272	2.496
	29	11.959	4.151	3.668			29	4.763	3.071	1.975
	30	2.136	1.832	1.485			30	7.538	3.347	2.868
	31	7.805	4	2.484			31	6.68	3.367	2.526
	32	3.077	2.158	1.815			32	5.71	3.721	1.954
	33	5.55	3.116	2.268			33	5.124	3.147	2.073
	34	9.107	3.83	3.028			34	6.621	3.455	2.44
	35	4.331	2.521	2.188			35	6.065	3.463	2.23
	36	4.314	2.421	2.268			36	6.651	3.021	2.803
	37	5.734	3.048	2.395			37	4.817	3.014	2.035
	38	9.775	4.584	2.715			38	4.58	3.5	1.666
	39	12.639	4.311	3.733			39	4.183	3.084	1.727
	40	5.42	2.915	2.367			40	5.201	2.781	2.381
	41	4.935	2.804	2.241			41	4.124	2.503	2.098
	42	12.331	4.21	3.729			42	5.87	3.691	2.025
	43	4.834	2.542	2.421			43	3.095	2.262	1.742
	44	2.746	2.203	1.587			44	5.74	3.536	2.067
	45	5.899	2.887	2.602			45	5.763	3.459	2.122
	46	3.533	2.36	1.906			46	5.651	3.665	1.963
	47	1.734	1.53	1.443			47	2.414	1.79	1.718
	48	3.793	2.329	2.073			48	5.959	3.167	2.395
	49	4.172	2.796	1.9			49	2.296	1.853	1.578
	50	4.118	2.531	2.072			50	3.385	2.204	1.956
	51	10.03	4.024	3.173			51	1.858	1.565	1.512
	52	7.402	3.308	2.849			52	6.615	3.161	2.665
	53	11.391	4.267	3.399			53	3.396	2.546	1.698
	54	2.331	1.854	1.601			54	2.787	2.247	1.579
	55	3.84	2.377	2.057			55	0.799	1.156	0.88
	56	5.533	3.08	2.287			56	4.095	2.875	1.814
	57	2.533	1.945	1.658			57	2.834	2.693	1.34
	58	2.012	1.672	1.532			58	3.414	2.523	1.723
	59	5.716	2.79	2.608			59	3.225	2.215	1.854
	60	8.083	3.32	3.1			60	3.834	2.448	1.994
	61	9.237	3.561	3.302			61	3.905	2.477	2.007
	62	7.97	3.493	2.906			62	0.373	0.739	0.642
	63	7.201	3.444	2.662			63	6.426	3.233	2.531
	64	2.13	1.821	1.489			64	3.367	2.398	1.788
	65	2.024	1.737	1.484			65	3.32	2.646	1.597
	66	5.893	3.303	2.272			66	4.45	2.812	2.015
	67	10.621	4.054	3.336			67	4.467	2.8	2.032
	68	4.515	2.476	2.321			68	4.231	2.645	2.036
	69	8.592	3.709	2.95			69	2.462	2.185	1.434
	70	5.249	2.858	2.338			70	2.438	1.938	1.601
	71	9.254	3.466	3.4			71	6.781	3.174	2.72
	72	1.432	1.469	1.241			72	5.361	2.766	2.468
	73	6.544	3.099	2.689			73	3.923	2.357	2.119
	74	6.178	3.119	2.522			74	6.71	3.492	2.447
	75	4.911	2.905	2.153			75	4.633	2.509	2.351
	76	7.604	3.536	2.738			76	4.361	2.829	1.963
	77	5.148	2.635	2.488			77	3.059	2.553	1.526
	78	7.367	3.641	2.576			78	3.734	2.428	1.958
	79	3.817	2.22	2.189			79	4.828	2.817	2.182
	80	4.615	2.472	2.377			80	4.805	2.629	2.327
	81	3.408	2.2	1.973			81	4.822	2.656	2.312
	82	6.953	3.173	2.79			82	8.911	4.142	2.74
	83	5.899	2.772	2.71			83	4.243	2.997	1.802
	84	8.296	3.681	2.869			84	2.615	1.941	1.715
	85	5.083	3.131	2.067			85	4.13	2.666	1.972
	86	7.408	3.213	2.935			86	4.355	2.983	1.859
	87	9.846	3.743	3.349			87	6.349	3.09	2.616
	88	2.704	1.926	1.788			88	2.858	2.581	1.41
	89	3.592	2.544	1.797			89	3.586	2.25	2.029
	90	7.562	3.359	2.867			90	3.805	2.84	1.706
	91	10.805	4.363	3.153			91	5.692	2.991	2.423
	92	1.586	1.519	1.329			92	3.893	2.536	1.955
	93	10.964	4.37	3.194			93	4.302	2.55	2.148
	94	8.775	3.804	2.937			94	2.609	2.157	1.541
	95	9.781	4.235	2.94			95	2.775	2.109	1.676
	96	4.834	2.679	2.298			96	1.846	1.851	1.27
	97	5.237	2.827	2.359			97	1.947	2.159	1.148
	98	3.538	2.282	1.975			98	2.142	1.874	1.455
	99	6.432	3.258	2.514			99	3.799	2.567	1.885
	100	6.118	2.956	2.635			100	1.118	1.288	1.106
	101	7.775	3.504	2.825			101	4.828	2.79	2.203
	102	10.769	4.144	3.309			102	2.941	2.127	1.76
	103	10.639	3.939	3.439			103	1.763	1.801	1.247
	104	9.095	3.854	3.005			104	2.911	2.304	1.609
	105	3.178	2.427	1.667			105	3.58	2.485	1.834
	106	2.503	1.915	1.664			106	3.414	2.356	1.845
	107	4.953	2.805	2.248			107	3.302	2.363	1.779
	108	12.243	4.172	3.736			108	3.775	2.356	2.04
	109	9.817	3.95	3.165			109	4.296	2.981	1.835
	110	3.781	2.363	2.037			110	3.751	2.406	1.986
	111	12.13	4.499	3.433			111	3.935	2.632	1.903
	112	5.32	2.85	2.377			112	2.586	2.089	1.576
	113	1.621	1.506	1.371			113	3.757	2.355	2.031
	114	5.284	3.266	2.06			114	6.941	3.24	2.727
	115	7.272	3.471	2.668			115	4.367	2.627	2.117
	116	9.201	4.218	2.777			116	4.041	3.309	1.555
	117	5.988	3.026	2.52			117	3.142	2.382	1.679
	118	2.822	1.958	1.835			118	3.426	2.762	1.579
	119	7.207	3.44	2.668			119	4.402	3.084	1.817
	120	9.112	3.752	3.092			120	7.627	3.883	2.501
	121	9.231	3.792	3.1			121	4.645	2.829	2.09
	122	1.254	1.35	1.183			122	3.846	2.658	1.843
	123	6.284	2.865	2.792			123	4.237	2.804	1.923
	124	4.675	2.612	2.278			124	3.124	2.73	1.457
	125	8.947	3.472	3.281			125	2.041	1.932	1.345
	126	4	2.327	2.189			126	3.562	2.535	1.789
	127	2.959	2.061	1.827			127	1.811	2.011	1.146
	128	7.864	3.427	2.922			128	3.473	2.356	1.877
	129	6.799	3.155	2.744			129	2.237	1.768	1.611
	130	10.568	4.07	3.306			130	3.296	2.249	1.866
	131	1.834	1.559	1.498			131	3.704	2.459	1.918
	132	1.527	1.432	1.358			132	5.556	3.041	2.326
	133	4.686	2.582	2.311			133	3.26	2.505	1.657
	134	7.959	4.088	2.479			134	4.538	2.874	2.01
	135	11.503	4.251	3.446			135	3.462	2.949	1.495
	136	5.888	3.186	2.353			136	6.556	3.504	2.382
	137	6.42	2.987	2.737			137	3.615	2.459	1.872
	138	8.751	3.723	2.993			138	3	2.27	1.683
	139	4.888	3.005	2.071			139	1.763	1.712	1.311
	140	6.793	3.188	2.713			140	2.775	2.207	1.601
	141	9.201	3.746	3.127			141	3.846	2.723	1.798
	142	4.947	2.998	2.101			142	2.29	2.17	1.344
	143	2.982	2.236	1.698			143	2.533	2.114	1.526
							144	2.615	1.917	1.737
							145	5.391	3.133	2.191
							146	6.166	3.144	2.497
							147	3.065	2.47	1.58
							148	4.864	3.312	1.87
							149	2.509	1.819	1.756
							150	4.231	2.986	1.804
							151	4.462	2.637	2.154
							152	1.592	1.466	1.382
							153	3.657	2.948	1.579
							154	4.467	2.92	1.948
							155	1.29	1.305	1.259
							156	5.444	2.986	2.321
							157	3.663	2.794	1.669
							158	3.071	2.439	1.603
							159	3.527	2.707	1.659
							160	4.178	2.444	2.177
							161	6.45	2.958	2.776
							162	4.521	2.441	2.358
							163	4.627	3.141	1.876
							164	4.012	2.531	2.018
							165	3.391	2.669	1.617
							166	2.686	1.977	1.73
							167	5.154	3.025	2.169
							168	4.142	2.392	2.205
							169	5.178	3.188	2.068
							170	1.988	1.875	1.35
							171	5.497	3.245	2.157
							172	4.254	2.889	1.875
							173	2.751	2.069	1.693
							174	3.118	2.311	1.718
							175	3.195	2.568	1.584
							176	2.124	1.951	1.386
							177	3.065	2.056	1.898
							178	3.757	2.622	1.824
							179	3.03	2.137	1.805
							180	3.349	2.669	1.598
							181	2.574	1.84	1.781
							182	3.698	2.508	1.877
							183	1.982	1.698	1.486
							184	4.408	2.98	1.883
							185	6.846	3.359	2.595
							186	3.012	2.159	1.776
							187	2.923	2.354	1.581
							188	4.722	3.01	1.997
							189	6.201	3.248	2.431
							190	5.876	3.153	2.373
							191	1.799	1.895	1.209
							192	4.746	3.219	1.877
							193	5.947	2.981	2.54
							194	2.124	2.222	1.217
							195	9.314	4.179	2.838
							196	4.899	3.239	1.926
							197	5.68	2.961	2.443
