# Supplementary material for: Spaceflight Enhances Cell Aggregation and Random Budding in Candida albicans
Source: PLoS One. 2013 Dec 4;8(12):e80677. doi: 10.1371/journal.pone.0080677 (PMC3851762; doi:10.1371/journal.pone.0080677)
Supplement: Table S2 — Complete microarray gene list. (XLSX) [file pone.0080677.s004.xlsx]

## Sheet: Sheet1
Column ID	Mean Raw Intensity	p-value(Treatment)	p-value(Date)	p-value(Dye Swap)	p-value(FLT vs. GRD)	Ratio(FLT vs. GRD)	Fold-Change(FLT vs. GRD)	Fold-Change(FLT vs. GRD) (Description)	F(Treatment)	F(Date)	F(Dye Swap)	F(Error)
orf19.10_1251	1947.19	0.0044898	0.368036	0.466597	0.0044898	0.366741	-2.72672	FLT down vs GRD	15.2773	1.25594	0.584248	1	orf19.10_1251	ALK8 , , orf19.7683 | IPF27231.1 | Contig20011:complement(5305..3758) , cytochrome p450	ALK8		cytochrome p450	orf19.7683	IPF27231.1	Contig20011:complement(5305..3758)
orf19.100_761	620.125	0.000463941	0.175347	0.601736	0.000463941	3.28996	3.28996	FLT up vs GRD	32.2847	2.04844	0.295164	1	orf19.100_761	LIP11 , , orf19.7747 | IPF10462.3 | Contig20035:complement(34456..33401) , triacylglycerol lipase	LIP11		triacylglycerol lipase	orf19.7747	IPF10462.3	Contig20035:complement(34456..33401)
orf19.1002_1438	63.6875	0.430787	0.874527	0.092426	0.430787	0.620587	-1.61138	FLT down vs GRD	0.688346	0.340787	3.65092	1	orf19.1002_1438	, , orf19.8618 | IPF26289.1 | Contig20081:complement(34863..32971) , hypothetical protein			hypothetical protein	orf19.8618	IPF26289.1	Contig20081:complement(34863..32971)
orf19.1003_102	31.5	0.432653	0.210284	0.68303	0.432653	1.70919	1.70919	FLT up vs GRD	0.682562	1.84504	0.179421	1	orf19.1003_102	, , orf19.8619 | IPF19532.1 | Contig20081:complement(36703..35861) , hypothetical protein			hypothetical protein	orf19.8619	IPF19532.1	Contig20081:complement(36703..35861)
orf19.1004_187	29	0.273544	0.235021	0.5306	0.273544	2.61053	2.61053	FLT up vs GRD	1.38209	1.72384	0.429552	1	orf19.1004_187	, , orf19.8620 | IPF26296.1 | Contig20081:38310..38930 , hypothetical protein			hypothetical protein	orf19.8620	IPF26296.1	Contig20081:38310..38930
orf19.1005_1012	17.8125	0.0934583	0.0101469	0.0493875	0.0934583	0.379042	-2.63823	FLT down vs GRD	3.62343	6.59966	5.35413	1	orf19.1005_1012	LRR , , , leucine rich repeats	LRR		leucine rich repeats
orf19.1006_267	196.25	0.0761946	0.0606572	0.806891	0.0761946	2.09632	2.09632	FLT up vs GRD	4.14359	3.4041	0.0638442	1	orf19.1006_267	, , orf19.8621 | IPF26285.1 | Contig20083:complement(379..2) , hypothetical protein			hypothetical protein	orf19.8621	IPF26285.1	Contig20083:complement(379..2)
orf19.1007_764	558.625	0.0321261	0.000576434	0.165614	0.0321261	1.72667	1.72667	FLT up vs GRD	6.70675	15.7915	2.32755	1	orf19.1007_764	KCS1 , , orf19.8622 | IPF26283.1 | Contig20083:complement(2073..1072) , inositol polyphosphate kinase	KCS1		inositol polyphosphate kinase	orf19.8622	IPF26283.1	Contig20083:complement(2073..1072)
orf19.1008_193	32.0625	0.471014	0.544871	0.842746	0.471014	1.70659	1.70659	FLT up vs GRD	0.572356	0.862128	0.0419955	1	orf19.1008_193	, , , hypothetical protein			hypothetical protein
orf19.1009_16	85.0625	0.364183	0.138125	0.0537439	0.364183	0.700745	-1.42705	FLT down vs GRD	0.9256	2.32683	5.10644	1	orf19.1009_16	, , orf19.8623 | IPF26287.1 | Contig20083:2699..3049 , hypothetical protein			hypothetical protein	orf19.8623	IPF26287.1	Contig20083:2699..3049
orf19.101_672	762	0.000522336	0.9102	0.800792	0.000522336	3.83974	3.83974	FLT up vs GRD	31.1358	0.282186	0.0680466	1	orf19.101_672	RIM9 , , orf19.7748 | IPF20039.1 | Contig20035:35076..36116 , low similarity to a regulator of sporulation	RIM9		low similarity to a regulator of sporulation	orf19.7748	IPF20039.1	Contig20035:35076..36116
orf19.1010_197	171	0.889175	0.402233	0.757262	0.889175	0.944351	-1.05893	FLT down vs GRD	0.0206935	1.16623	0.102316	1	orf19.1010_197	KTR3 , , orf19.8624 | IPF19565.2 | Contig20083:3773..4909 , mannosyltransferase involved in O- and N-linked glycosylation	KTR3		mannosyltransferase involved in O- and N-linked glycosylation	orf19.8624	IPF19565.2	Contig20083:3773..4909
orf19.1011_1259	569.25	0.744619	0.547422	0.69289	0.744619	0.91529	-1.09255	FLT down vs GRD	0.113726	0.857428	0.167722	1	orf19.1011_1259	MNN2 , , orf19.8625 | IPF26282.1 | Contig20083:complement(6999..4984) , alpha-1,2-mannosyltransferase	MNN2		alpha-1,2-mannosyltransferase	orf19.8625	IPF26282.1	Contig20083:complement(6999..4984)
orf19.1012_357	2198.75	1.84e-06	0.459123	0.728538	1.84e-06	0.398788	-2.5076	FLT down vs GRD	149.962	1.0336	0.129228	1	orf19.1012_357	APS1 , , orf19.8626 | IPF26284.1 | Contig20083:8257..8718 , AP-1 clathrin associated protein complex subunit	APS1		AP-1 clathrin associated protein complex subunit	orf19.8626	IPF26284.1	Contig20083:8257..8718
orf19.1013_244	505.938	0.71538	0.226037	0.310506	0.71538	1.0887	1.0887	FLT up vs GRD	0.14276	1.76604	1.17217	1	orf19.1013_244	, , orf19.8627 | IPF26286.1 | Contig20083:complement(12100..11720) , hypothetical protein			hypothetical protein	orf19.8627	IPF26286.1	Contig20083:complement(12100..11720)
orf19.1014_291	2283.25	0.000505072	0.0614385	0.334158	0.000505072	2.0608	2.0608	FLT up vs GRD	31.458	3.38578	1.05617	1	orf19.1014_291	, , , probable 26S proteasome regulatory subunit			probable 26S proteasome regulatory subunit
orf19.1016_43	1680.81	0.00530154	0.00547451	0.115391	0.00530154	0.616801	-1.62127	FLT down vs GRD	14.3744	8.06682	3.11869	1	orf19.1016_43	URM12 , , , ubiquitin-like protein	URM12		ubiquitin-like protein
orf19.1017_1379	265.5	0.934893	0.61113	0.815581	0.934893	0.970195	-1.03072	FLT down vs GRD	0.00710569	0.745813	0.058104	1	orf19.1017_1379	PEP38 , , , vacuolar membrane protein	PEP38		vacuolar membrane protein
orf19.1018_181	697.625	0.90037	0.0445311	0.436138	0.90037	1.03146	1.03146	FLT up vs GRD	0.0166991	3.86363	0.67187	1	orf19.1018_181	TEL12 , , , involved in controlling telomere length | ataxia telangiectasia (ATM) gene homolog	TEL12		involved in controlling telomere length | ataxia telangiectasia (ATM) gene homolog
orf19.1019_144	231.063	0.403194	0.0172503	0.225614	0.403194	1.34144	1.34144	FLT up vs GRD	0.778979	5.50376	1.72379	1	orf19.1019_144	VPS18 , VPS18 , , vacuolar membrane protein	VPS18	VPS18	vacuolar membrane protein
orf19.102_529	439.313	0.603769	0.140093	0.424465	0.603769	0.874413	-1.14362	FLT down vs GRD	0.291814	2.30993	0.708254	1	orf19.102_529	, , orf19.7749 | IPF17548.2 | Contig20035:complement(37543..36188) , hypothetical protein			hypothetical protein	orf19.7749	IPF17548.2	Contig20035:complement(37543..36188)
orf19.1020_30	902	0.000497579	0.0118142	0.388634	0.000497579	1.98212	1.98212	FLT up vs GRD	31.6022	6.27082	0.830974	1	orf19.1020_30	, , , hypothetical protein			hypothetical protein
orf19.1021_24	108.875	0.739539	0.266885	0.0748709	0.739539	1.14436	1.14436	FLT up vs GRD	0.118502	1.58806	4.18969	1	orf19.1021_24	LRR , , , leucine rich repeat	LRR		leucine rich repeat
orf19.1022_7	21.875	0.116219	0.123335	0.610923	0.116219	0.368052	-2.71701	FLT down vs GRD	3.10212	2.46382	0.280227	1	orf19.1022_7	LRR , , , leucine rich repeat	LRR		leucine rich repeat
orf19.1023_239	34.375	0.386247	0.316196	0.166907	0.386247	1.78473	1.78473	FLT up vs GRD	0.839794	1.41111	2.31153	1	orf19.1023_239	, , , hypothetical protein			hypothetical protein
orf19.1024_31	396.563	0.332501	0.365204	0.295409	0.332501	1.21663	1.21663	FLT up vs GRD	1.06389	1.26377	1.25329	1	orf19.1024_31	, , , hypothetical protein			hypothetical protein
orf19.1026_573	999.75	0.000476365	0.00930505	0.8352	0.000476365	0.579216	-1.72647	FLT down vs GRD	32.0256	6.79241	0.0461949	1	orf19.1026_573	CSL4 , , orf19.8628 | IPF15779.2 | Contig20087:1440..2423 , exosome 3'->5exonuclease | involved in kinetochore-related function	CSL4		exosome 3'->5exonuclease | involved in kinetochore-related function	orf19.8628	IPF15779.2	Contig20087:1440..2423
orf19.1027_646	1380.75	0.00390651	0.182673	0.043242	0.00390651	0.634861	-1.57515	FLT down vs GRD	16.0632	2.00201	5.75536	1	orf19.1027_646	PDR16 , , orf19.8629 | IPF15777.2 | Contig20087:complement(3700..2591) , phosphatidylinositol transfer protein | drug resistance	PDR16		phosphatidylinositol transfer protein | drug resistance	orf19.8629	IPF15777.2	Contig20087:complement(3700..2591)
orf19.1028_897	330.313	0.0136991	0.0215036	0.567796	0.0136991	0.570869	-1.75171	FLT down vs GRD	9.89172	5.08861	0.354944	1	orf19.1028_897	ELA1 , , orf19.8630 | IPF19583.2 | Contig20087:6102..7280 , transcriptional elongation factor	ELA1		transcriptional elongation factor	orf19.8630	IPF19583.2	Contig20087:6102..7280
orf19.1029_589	357.313	0.338237	0.0760952	0.190866	0.338237	0.734084	-1.36224	FLT down vs GRD	1.0374	3.08724	2.04204	1	orf19.1029_589	RPP1 , , orf19.8631 | IPF26259.1 | Contig20087:complement(8572..7448) , nuclear ribonuclease P subunit (RNase P)| required for processing of tRNA and 35S rRNA	RPP1		nuclear ribonuclease P subunit (RNase P)| required for processing of tRNA and 35S rRNA	orf19.8631	IPF26259.1	Contig20087:complement(8572..7448)
orf19.103_157	95.75	0.976586	0.178152	0.635379	0.976586	1.01131	1.01131	FLT up vs GRD	0.000916835	2.03039	0.242873	1	orf19.103_157	, , , conserved hypothetical protein			conserved hypothetical protein
orf19.1030_44	2658.31	0.221472	0.358506	0.132098	0.221472	0.764341	-1.30832	FLT down vs GRD	1.75807	1.28257	2.81179	1	orf19.1030_44	FPR3 , , orf19.8632 | IPF26252.1 | Contig20087:8640..9926 , peptidyl-prolyl cis-trans isomerases (PPIase)| FK506-rapamycin binding protein	FPR3		peptidyl-prolyl cis-trans isomerases (PPIase)| FK506-rapamycin binding protein	orf19.8632	IPF26252.1	Contig20087:8640..9926
orf19.1031_3142	2536.13	0.00290818	0.000823141	0.936714	0.00290818	0.770909	-1.29717	FLT down vs GRD	17.8247	14.2638	0.00671286	1	orf19.1031_3142	HMG1 , , orf19.8633 | IPF26280.1 | Contig20087:11887..15108 , 3-hydroxy-3-methyl-glutaryl coenzyme A reductase (HMG-CoA)	HMG1		3-hydroxy-3-methyl-glutaryl coenzyme A reductase (HMG-CoA)	orf19.8633	IPF26280.1	Contig20087:11887..15108
orf19.1032_1647	1786.31	0.00490476	0.08971	0.14207	0.00490476	0.633384	-1.57882	FLT down vs GRD	14.7923	2.86723	2.65198	1	orf19.1032_1647	SKO1 , , orf19.8634 | IPF26249.1 | Contig20087:complement(17053..15329) , CREB like trancsriptional repressor | bZIP protein	SKO1		CREB like trancsriptional repressor | bZIP protein	orf19.8634	IPF26249.1	Contig20087:complement(17053..15329)
orf19.1033_1680	1531.38	0.249713	0.0269445	0.180046	0.249713	0.87616	-1.14134	FLT down vs GRD	1.54043	4.68599	2.15773	1	orf19.1033_1680	STR2 , , orf19.8635 | IPF26248.1 | Contig20087:18597..20384 , cystathionine gamma-synthase | Sulfur TRansfer	STR2		cystathionine gamma-synthase | Sulfur TRansfer	orf19.8635	IPF26248.1	Contig20087:18597..20384
orf19.1034_94	1143.88	0.00796262	0.0830594	0.497785	0.00796262	2.14749	2.14749	FLT up vs GRD	12.3195	2.96917	0.504317	1	orf19.1034_94	ATM2 , , orf19.8636 | IPF18786.2 | Contig20087:complement(21138..20461) , putative steroid binding	ATM2		putative steroid binding	orf19.8636	IPF18786.2	Contig20087:complement(21138..20461)
orf19.1035_2512	680.938	0.173344	0.381447	0.126852	0.173344	1.26681	1.26681	FLT up vs GRD	2.23422	1.21972	2.90238	1	orf19.1035_2512	WAR1 , , orf19.8637 | IPF6159.2 | Contig20087:complement(24360..21517) , transcription factor activity	WAR1		transcription factor activity	orf19.8637	IPF6159.2	Contig20087:complement(24360..21517)
orf19.1036_1729	2327.81	2.56e-05	0.298155	0.2929	2.56e-05	0.519849	-1.92364	FLT down vs GRD	74.1583	1.47194	1.26735	1	orf19.1036_1729	MNS1 , , orf19.8638 | IPF6163.1 | Contig20087:27046..28743 , mannosyl- oligosaccharide 1,2-alpha-mannosidase	MNS1		mannosyl- oligosaccharide 1,2-alpha-mannosidase	orf19.8638	IPF6163.1	Contig20087:27046..28743
orf19.1037_545	253.063	0.184718	0.0769679	0.452226	0.184718	1.42807	1.42807	FLT up vs GRD	2.10664	3.07173	0.624329	1	orf19.1037_545	, , orf19.8639 | IPF26266.1 | Contig20087:29701..30432 , hypothetical protein			hypothetical protein	orf19.8639	IPF26266.1	Contig20087:29701..30432
orf19.1038_917	513.625	0.112651	0.0984757	0.228477	0.112651	1.35981	1.35981	FLT up vs GRD	3.17459	2.74616	1.70061	1	orf19.1038_917	, , orf19.8640 | IPF26258.1 | Contig20087:30374..31474 , hypothetical protein			hypothetical protein	orf19.8640	IPF26258.1	Contig20087:30374..31474
orf19.1039_1040	426.813	0.15077	0.90404	0.214916	0.15077	0.650527	-1.53721	FLT down vs GRD	2.52426	0.292683	1.81418	1	orf19.1039_1040	BET4 , BET4 , orf19.8641 | IPF17890.1 | Contig20087:complement(32725..31622) , geranylgeranyltransferase type II alpha subunit	BET4	BET4	geranylgeranyltransferase type II alpha subunit	orf19.8641	IPF17890.1	Contig20087:complement(32725..31622)
orf19.104_758	125.313	0.470455	0.325611	0.29754	0.470455	0.782438	-1.27806	FLT down vs GRD	0.573851	1.3809	1.24147	1	orf19.104_758	, , orf19.7750 | IPF17213.3 | Contig20035:37805..39262 , hypothetical protein			hypothetical protein	orf19.7750	IPF17213.3	Contig20035:37805..39262
orf19.1040_0	762	0.0823694	0.988185	0.0261314	0.0823694	1.36499	1.36499	FLT up vs GRD	3.94144	0.104745	7.41415	1	orf19.1040_0	MAD2 , , orf19.8642 | IPF17891.2 | Contig20087:33026..33664 , spindle checkpoint complex subunit	MAD2		spindle checkpoint complex subunit	orf19.8642	IPF17891.2	Contig20087:33026..33664
orf19.1041_951	405.125	0.910849	0.072524	0.705799	0.910849	0.965021	-1.03625	FLT down vs GRD	0.0133542	3.15304	0.153108	1	orf19.1041_951	CTK2 , , orf19.8643 | IPF26251.1 | Contig20087:complement(35171..33675) , RNA polymerase II C-terminal domain kinase beta subunit	CTK2		RNA polymerase II C-terminal domain kinase beta subunit	orf19.8643	IPF26251.1	Contig20087:complement(35171..33675)
orf19.1042_448	16195	0.816413	0.00431494	0.0749155	0.816413	1.01385	1.01385	FLT up vs GRD	0.0575693	8.6951	4.18811	1	orf19.1042_448	POR1 , , orf19.8644 | IPF26262.1 | Contig20087:complement(36238..35390) , porin|voltage-dependent anion channel(VDAC)	POR1		porin|voltage-dependent anion channel(VDAC)	orf19.8644	IPF26262.1	Contig20087:complement(36238..35390)
orf19.1043_404	466.25	0.793297	0.121845	0.744025	0.793297	0.909026	-1.10008	FLT down vs GRD	0.0734081	2.47871	0.114278	1	orf19.1043_404	VPS66 , , orf19.8645 | IPF26261.1 | Contig20087:37811..38728 , vacuolar Protein Sorting	VPS66		vacuolar Protein Sorting	orf19.8645	IPF26261.1	Contig20087:37811..38728
orf19.1045_997	656.188	0.0290747	0.077267	0.00958491	0.0290747	0.561224	-1.78182	FLT down vs GRD	7.04373	3.06647	11.4514	1	orf19.1045_997	, , orf19.8647 | IPF26260.1 | Contig20087:complement(39860..38790) , conserved RNA-binding protein | IST3-like			conserved RNA-binding protein | IST3-like	orf19.8647	IPF26260.1	Contig20087:complement(39860..38790)
orf19.1047_1952	690.313	0.195912	0.521759	0.54191	0.195912	0.659283	-1.5168	FLT down vs GRD	1.99108	0.905648	0.405788	1	orf19.1047_1952	ERB1 , , orf19.8649 | IPF26243.1 | Contig20087:39929..42448 , maturation of the 25S and 5.8S ribosomal RNAs	ERB1		maturation of the 25S and 5.8S ribosomal RNAs	orf19.8649	IPF26243.1	Contig20087:39929..42448
orf19.1048_733	1375.13	0.000125653	0.406869	0.808867	0.000125653	2.3688	2.3688	FLT up vs GRD	47.4872	1.1547	0.0625139	1	orf19.1048_733	IFD1 , , orf19.8650 | IPF18856.2 | Contig20087:43153..44187 , conserved aryl-alcohol dehydrogenase	IFD1		conserved aryl-alcohol dehydrogenase	orf19.8650	IPF18856.2	Contig20087:43153..44187
orf19.1049_200	327.875	0.166118	0.122154	0.233804	0.166118	1.27552	1.27552	FLT up vs GRD	2.32128	2.47561	1.65853	1	orf19.1049_200	, , orf19.8651 | IPF18855.2 | Contig20087:complement(44862..44278) , 8-oxo-dGTPase			8-oxo-dGTPase	orf19.8651	IPF18855.2	Contig20087:complement(44862..44278)
orf19.105_312	493.063	0.0700011	0.0877181	0.410109	0.0700011	0.744254	-1.34363	FLT down vs GRD	4.36875	2.89676	0.755332	1	orf19.105_312	MET22 , , , 3'(2')5'-bisphosphate nucleotidase , possibly involved in salt tolerance and methionine synthesis	MET22		3'(2')5'-bisphosphate nucleotidase , possibly involved in salt tolerance and methionine synthesis
orf19.1050_677	365.625	0.848881	0.255975	0.385153	0.848881	1.05566	1.05566	FLT up vs GRD	0.0387357	1.63233	0.843867	1	orf19.1050_677	, , orf19.8652 | IPF15638.2 | Contig20087:complement(46103..45192) , hypothetical protein			hypothetical protein	orf19.8652	IPF15638.2	Contig20087:complement(46103..45192)
orf19.1051_331	3257.25	0.501242	0.0497999	0.435251	0.501242	0.907983	-1.10134	FLT down vs GRD	0.49601	3.69352	0.674578	1	orf19.1051_331	HTA2 , , orf19.8653 | IPF26275.1 | Contig20087:complement(46844..46449) , histone 2A	HTA2		histone 2A	orf19.8653	IPF26275.1	Contig20087:complement(46844..46449)
orf19.1052_154	6943.31	0.707338	0.150749	0.475236	0.707338	1.10289	1.10289	FLT up vs GRD	0.151417	2.22323	0.561172	1	orf19.1052_154	HTB2 , , orf19.8654 | IPF26276.1 | Contig20087:47711..48103 , histone 2B	HTB2		histone 2B	orf19.8654	IPF26276.1	Contig20087:47711..48103
orf19.1053_818	1153	0.0890953	0.0782814	0.0157934	0.0890953	1.2911	1.2911	FLT up vs GRD	3.74241	3.04879	9.30952	1	orf19.1053_818	BST1 , , orf19.8655 | IPF26257.1 | Contig20087:complement(49559..48372) , negative regulator of COPII vesicle formation	BST1		negative regulator of COPII vesicle formation	orf19.8655	IPF26257.1	Contig20087:complement(49559..48372)
orf19.1054_670	3837.25	0.292081	0.429059	0.0703792	0.292081	0.85011	-1.17632	FLT down vs GRD	1.27199	1.1014	4.35428	1	orf19.1054_670	, , orf19.8656 | IPF18853.1 | Contig20087:complement(51174..50362) , hypothetical protein			hypothetical protein	orf19.8656	IPF18853.1	Contig20087:complement(51174..50362)
orf19.1055_1033	4549.44	0.00837441	0.264412	0.103373	0.00837441	1.5291	1.5291	FLT up vs GRD	12.0793	1.59791	3.37799	1	orf19.1055_1033	CDC3 , CDC3 , orf19.8657 | IPF16098.2 | Contig20087:complement(53301..52165) , septin | cell cycle | involved in proper bud growth	CDC3	CDC3	septin | cell cycle | involved in proper bud growth	orf19.8657	IPF16098.2	Contig20087:complement(53301..52165)
orf19.1057_446	1793.25	0.00142515	0.0634073	0.0661899	0.00142515	1.51024	1.51024	FLT up vs GRD	22.6662	3.34084	4.52046	1	orf19.1057_446	, , orf19.8659 | IPF26268.1 | Contig20087:complement(55626..55057) , conserved hypothetical protein			conserved hypothetical protein	orf19.8659	IPF26268.1	Contig20087:complement(55626..55057)
orf19.1058_139	5431.13	0.000339509	0.159821	0.578786	0.000339509	1.82144	1.82144	FLT up vs GRD	35.4795	2.15502	0.334766	1	orf19.1058_139	, , orf19.8660 | IPF26270.1 | Contig20087:55951..56421 , RPN13-like conserved protein			RPN13-like conserved protein	orf19.8660	IPF26270.1	Contig20087:55951..56421
orf19.1059_65	12354.7	0.29686	0.1973	0.329052	0.29686	1.25616	1.25616	FLT up vs GRD	1.24523	1.9156	1.08015	1	orf19.1059_65	HHF1 , , orf19.8661 | IPF26279.1 | Contig20087:complement(57572..57255) , histone H4	HHF1		histone H4	orf19.8661	IPF26279.1	Contig20087:complement(57572..57255)
orf19.1060_388	477.188	0.788763	0.647915	0.874792	0.788763	0.94314	-1.06029	FLT down vs GRD	0.076759	0.685534	0.0264701	1	orf19.1060_388	, , orf19.8662 | IPF26269.1 | Contig20087:complement(58267..57683) , hypothetical protein			hypothetical protein	orf19.8662	IPF26269.1	Contig20087:complement(58267..57683)
orf19.1061_10	17749.1	0.0125838	0.0695708	0.771516	0.0125838	1.44643	1.44643	FLT up vs GRD	10.2496	3.21054	0.0902519	1	orf19.1061_10	HHT1 , , orf19.8663 | IPF26271.1 | Contig20087:58481..58891 , histone H3	HHT1		histone H3	orf19.8663	IPF26271.1	Contig20087:58481..58891
orf19.1062_1085	334.563	0.999536	0.00902815	0.0633674	0.999536	0.999881	-1.00012	FLT down vs GRD	3.59e-07	6.86061	4.64023	1	orf19.1062_1085	, , orf19.8664 | IPF26254.1 | Contig20087:complement(60470..59235) , conserved hypothetical protein			conserved hypothetical protein	orf19.8664	IPF26254.1	Contig20087:complement(60470..59235)
orf19.1063_772	360.188	0.00206543	0.00569576	0.0109183	0.00206543	0.525029	-1.90466	FLT down vs GRD	20.0388	7.96578	10.8659	1	orf19.1063_772	FMP44 , , orf19.8665 | IPF26256.1 | Contig20087:complement(62050..60866) , conserved hypothetical protein	FMP44		conserved hypothetical protein	orf19.8665	IPF26256.1	Contig20087:complement(62050..60866)
orf19.1064_1048	2134.75	0.107103	0.112543	0.848925	0.107103	1.36331	1.36331	FLT up vs GRD	3.29346	2.57702	0.0387131	1	orf19.1064_1048	ACS2 , , orf19.8666 | IPF26246.1 | Contig20087:complement(64356..62326) , acetyl-coenzyme A synthetase	ACS2		acetyl-coenzyme A synthetase	orf19.8666	IPF26246.1	Contig20087:complement(64356..62326)
orf19.1065_1653	9591.06	0.0010809	0.383883	0.077666	0.0010809	1.74506	1.74506	FLT up vs GRD	24.79	1.21329	4.09355	1	orf19.1065_1653	SSA2 , , orf19.8667 | IPF26247.1 | Contig20087:complement(68628..66691) , chaperonin of the HSP70 family	SSA2		chaperonin of the HSP70 family	orf19.8667	IPF26247.1	Contig20087:complement(68628..66691)
orf19.1066_75	1700.63	0.000111688	0.315358	0.617113	0.000111688	0.352945	-2.8333	FLT down vs GRD	49.119	1.41385	0.270445	1	orf19.1066_75	, , orf19.8668 | IPF26264.1 | Contig20087:complement(69992..69228) , conserved hypothetical protein			conserved hypothetical protein	orf19.8668	IPF26264.1	Contig20087:complement(69992..69228)
orf19.1067_51	4748.88	0.477369	0.0485425	0.44007	0.477369	0.918568	-1.08865	FLT down vs GRD	0.555587	3.73203	0.659981	1	orf19.1067_51	GPM2 , , orf19.8669 | IPF26265.1 | Contig20087:71410..72195 , phosphoglycerate mutase	GPM2		phosphoglycerate mutase	orf19.8669	IPF26265.1	Contig20087:71410..72195
orf19.1069_1454	9286.81	0.888392	0.228123	0.457448	0.888392	1.01713	1.01713	FLT up vs GRD	0.0209893	1.75607	0.609514	1	orf19.1069_1454	RPN4 , , orf19.8671 | IPF26253.1 | Contig20087:74467..75861 , Regulatory Particle Non-ATPase	RPN4		Regulatory Particle Non-ATPase	orf19.8671	IPF26253.1	Contig20087:74467..75861
orf19.107_2421	478.938	0.00951381	0.100269	0.512395	0.00951381	0.54026	-1.85096	FLT down vs GRD	11.4854	2.723	0.46992	1	orf19.107_2421	DHR2 , , orf19.7754 | IPF27157.1 | Contig20035:complement(43299..40801) , DEAH-box RNA helicase	DHR2		DEAH-box RNA helicase	orf19.7754	IPF27157.1	Contig20035:complement(43299..40801)
orf19.1070_416	233.75	0.825052	0.934471	0.258347	0.825052	1.09572	1.09572	FLT up vs GRD	0.0521743	0.238459	1.48067	1	orf19.1070_416	, , orf19.8672 | IPF26255.1 | Contig20087:complement(77394..76300) , conserved hypothetical protein			conserved hypothetical protein	orf19.8672	IPF26255.1	Contig20087:complement(77394..76300)
orf19.1071_594	276.625	0.830978	0.990599	0.942911	0.830978	1.08291	1.08291	FLT up vs GRD	0.0486361	0.0945441	0.00546002	1	orf19.1071_594	, , orf19.8673 | IPF26263.1 | Contig20087:complement(78564..77863) , hypothetical protein			hypothetical protein	orf19.8673	IPF26263.1	Contig20087:complement(78564..77863)
orf19.1072_198	11.5	0.268226	0.602442	0.116209	0.268226	4.87575	4.87575	FLT up vs GRD	1.41568	0.760448	3.10232	1	orf19.1072_198	, , , hypothetical protein			hypothetical protein
orf19.1073_321	12.4375	0.860647	0.728251	0.250159	0.860647	1.239	1.239	FLT up vs GRD	0.0328672	0.561059	1.53726	1	orf19.1073_321	, , , hypothetical protein			hypothetical protein
orf19.1074_158	145.75	0.137549	0.317388	0.00357276	0.137549	1.48318	1.48318	FLT up vs GRD	2.72254	1.40723	16.5824	1	orf19.1074_158	, , orf19.8674 | IPF26238.1 | Contig20090:3..371 , hypothetical protein			hypothetical protein	orf19.8674	IPF26238.1	Contig20090:3..371
orf19.1075_708	504.063	0.979639	0.461366	0.151624	0.979639	0.99584	-1.00418	FLT down vs GRD	0.000693248	1.02873	2.51226	1	orf19.1075_708	, , orf19.8674.1 | IPF18831.2 | Contig20090:complement(1212..340) , hypothetical protein			hypothetical protein	orf19.8674.1	IPF18831.2	Contig20090:complement(1212..340)
orf19.1077_1996	803.438	0.755988	0.122642	0.778663	0.755988	1.03764	1.03764	FLT up vs GRD	0.103436	2.47072	0.0845159	1	orf19.1077_1996	ATM1 , , orf19.8678 | IPF14199.2 | Contig20090:complement(6942..5074) , mitochondrial ABC transporter	ATM1		mitochondrial ABC transporter	orf19.8678	IPF14199.2	Contig20090:complement(6942..5074)
orf19.1078_224	1046.06	0.546527	0.281687	0.605831	0.546527	0.846924	-1.18074	FLT down vs GRD	0.396366	1.53125	0.288442	1	orf19.1078_224	AGX1 , , orf19.8680 | IPF26229.1 | Contig20090:complement(8909..8262) | orf19.8679 | IPF26228.1 | Contig20090:complement(8283..7633) , alanine glyoxylate aminotransferase	AGX1		alanine glyoxylate aminotransferase	orf19.8680	IPF26229.1	Contig20090:complement(8909..8262)
orf19.1080_1311	120.313	0.631745	0.626784	0.96423	0.631745	0.772592	-1.29434	FLT down vs GRD	0.248209	0.719844	0.0021408	1	orf19.1080_1311	, , orf19.8681 | IPF26225.1 | Contig20090:10553..12160 , hypothetical protein			hypothetical protein	orf19.8681	IPF26225.1	Contig20090:10553..12160
orf19.1082.1	11463.9	0.847216	0.00669827	0.377823	0.847216	0.980844	-1.01953	FLT down vs GRD	0.0396072	7.56242	0.871625	1	orf19.1082.1	COX12 , , orf19.8683.1 | IPF16288.3 | Contig20090:13578..13829 , cytochrome c oxidase subunit VIb	COX12		cytochrome c oxidase subunit VIb	orf19.8683.1	IPF16288.3	Contig20090:13578..13829
orf19.1083_563	821.125	2.89e-05	2.53e-05	0.689172	2.89e-05	0.602865	-1.65875	FLT down vs GRD	71.7382	36.9927	0.172078	1	orf19.1083_563	, , orf19.8684 | IPF26227.1 | Contig20090:complement(14853..14170) , conserved hypothetical protein			conserved hypothetical protein	orf19.8684	IPF26227.1	Contig20090:complement(14853..14170)
orf19.1084_5569	1894.88	0.163636	0.294567	0.0191762	0.163636	0.842148	-1.18744	FLT down vs GRD	2.35237	1.48454	8.54923	1	orf19.1084_5569	CDC39 , , orf19.8685 | IPF19634.2 | Contig20090:15801..22532 , NOT1 inhibitor of basal transcription	CDC39		NOT1 inhibitor of basal transcription	orf19.8685	IPF19634.2	Contig20090:15801..22532
orf19.1085_428	4549.88	0.290969	0.348349	0.468561	0.290969	0.927618	-1.07803	FLT down vs GRD	1.2783	1.31182	0.578936	1	orf19.1085_428	UBC1 , , orf19.8686 | IPF10066.2 | Contig20090:23051..23743 , E2 ubiquitin-conjugating enzyme	UBC1		E2 ubiquitin-conjugating enzyme	orf19.8686	IPF10066.2	Contig20090:23051..23743
orf19.1086_1592	2832.56	0.00628392	0.218922	0.66223	0.00628392	1.31542	1.31542	FLT up vs GRD	13.4896	1.80089	0.205672	1	orf19.1086_1592	BRE5 , , orf19.8687 | IPF19327.2 | Contig20090:24773..26638 , conserved hypothetical protein	BRE5		conserved hypothetical protein	orf19.8687	IPF19327.2	Contig20090:24773..26638
orf19.1087_1655	248.438	0.60356	0.0383958	0.353369	0.60356	0.88285	-1.1327	FLT down vs GRD	0.292157	4.09615	0.970667	1	orf19.1087_1655	, , orf19.8688 | IPF19579.1 | Contig20090:27108..29540 , hypothetical protein			hypothetical protein	orf19.8688	IPF19579.1	Contig20090:27108..29540
orf19.1089_646	2337.56	0.000531474	0.00365417	0.316322	0.000531474	0.501202	-1.9952	FLT down vs GRD	30.9705	9.15629	1.14245	1	orf19.1089_646	PEX11 , , orf19.8690 | IPF19049.2 | Contig20090:30096..30833 , peroxisomal membrane protein	PEX11		peroxisomal membrane protein	orf19.8690	IPF19049.2	Contig20090:30096..30833
orf19.109_1153	942.625	0.0380118	9.46e-05	0.0581302	0.0380118	1.17841	1.17841	FLT up vs GRD	6.15875	26.0219	4.8817	1	orf19.109_1153	MSY1 , , orf19.7756 | IPF11923.1 | Contig20035:43520..45025 , tyrosyl-tRNA synthetase	MSY1		tyrosyl-tRNA synthetase	orf19.7756	IPF11923.1	Contig20035:43520..45025
orf19.1090_70	546.188	0.473387	0.675547	0.782994	0.473387	0.794279	-1.259	FLT down vs GRD	0.566047	0.641791	0.0811393	1	orf19.1090_70	, , orf19.8691 | IPF26232.1 | Contig20090:complement(31367..31020) , hypothetical protein			hypothetical protein	orf19.8691	IPF26232.1	Contig20090:complement(31367..31020)
orf19.1091_1985	606.875	0.102463	0.0254556	0.443164	0.102463	0.678905	-1.47296	FLT down vs GRD	3.3992	4.7854	0.65075	1	orf19.1091_1985	NOP8 , , orf19.8692 | IPF26223.1 | Contig20090:31594..33666 , nucleolar protein required for 60S ribosome biogenesis	NOP8		nucleolar protein required for 60S ribosome biogenesis	orf19.8692	IPF26223.1	Contig20090:31594..33666
orf19.1092_1475	721.938	0.00154415	0.242888	0.0923176	0.00154415	0.429994	-2.32562	FLT down vs GRD	22.0773	1.6884	3.65383	1	orf19.1092_1475	RHK1 , , orf19.8693 | IPF17442.2 | Contig20090:34010..35602 , dol-p-man dependent alpha(1-3) mannosyltransferase	RHK1		dol-p-man dependent alpha(1-3) mannosyltransferase	orf19.8693	IPF17442.2	Contig20090:34010..35602
orf19.1093_2121	1146	0.393277	0.12531	0.206199	0.393277	0.837089	-1.19462	FLT down vs GRD	0.814058	2.4444	1.89254	1	orf19.1093_2121	, , orf19.8695 | IPF26221.1 | Contig20090:complement(38662..36209) , hypothetical protein			hypothetical protein	orf19.8695	IPF26221.1	Contig20090:complement(38662..36209)
orf19.1095_362	550.438	0.844521	0.00972994	0.397146	0.844521	1.06497	1.06497	FLT up vs GRD	0.0410384	6.69253	0.800206	1	orf19.1095_362	GLE2 , , orf19.8697 | IPF26226.1 | Contig20090:complement(42195..41044) , nuclear pore protein	GLE2		nuclear pore protein	orf19.8697	IPF26226.1	Contig20090:complement(42195..41044)
orf19.1096_2243	481.688	0.476594	0.0576431	0.425812	0.476594	0.846205	-1.18175	FLT down vs GRD	0.557611	3.47763	0.70397	1	orf19.1096_2243	GEF2 , , orf19.8698 | IPF26218.1 | Contig20090:42483..45122 , chloride channel, possibly voltage gated	GEF2		chloride channel, possibly voltage gated	orf19.8698	IPF26218.1	Contig20090:42483..45122
orf19.1097_5491	8019.69	0.00430989	0.171256	0.190679	0.00430989	3.61984	3.61984	FLT up vs GRD	15.5054	2.0754	2.04396	1	orf19.1097_5491	ALS4 , , orf19.8700 | IPF26222.1 | Contig20090:53175..55280 | orf19.8699 | IPF26230.1 | Contig20090:47856..53126 , agglutinin like protein 4	ALS4		agglutinin like protein 4	orf19.8700	IPF26222.1	Contig20090:53175..55280
orf19.1099_381	241.438	0.396059	0.560687	0.283449	0.396059	1.49938	1.49938	FLT up vs GRD	0.804074	0.833304	1.32196	1	orf19.1099_381	, , , hypothetical protein in Major Repeat Sequence			hypothetical protein in Major Repeat Sequence
orf19.11_78	826.875	0.584238	0.0943898	0.686046	0.584238	1.09351	1.09351	FLT up vs GRD	0.325054	2.80088	0.175792	1	orf19.11_78	, , orf19.7684 | IPF27233.1 | Contig20011:complement(6809..6090) , hypothetical protein			hypothetical protein	orf19.7684	IPF27233.1	Contig20011:complement(6809..6090)
orf19.1100_44	149	0.80024	0.63154	0.467838	0.80024	0.887455	-1.12682	FLT down vs GRD	0.0684341	0.71205	0.580887	1	orf19.1100_44	, , , hypothetical protein			hypothetical protein
orf19.1105.2	40694.2	0.00363422	0.237176	0.0747458	0.00363422	0.781325	-1.27988	FLT down vs GRD	16.4823	1.71399	4.1941	1	orf19.1105.2	, , orf19.8701.2 | IPF17002.3 | Contig20093:complement(1611..1357) , hypothetical protein			hypothetical protein	orf19.8701.2	IPF17002.3	Contig20093:complement(1611..1357)
orf19.1105.3	17.0625	0.363872	0.172915	0.564863	0.363872	0.214673	-4.65825	FLT down vs GRD	0.926866	2.06438	0.360468	1	orf19.1105.3	, , orf19.8702 | IPF26207.1 | Contig20093:2811..3209 , hypothetical protein			hypothetical protein	orf19.8702	IPF26207.1	Contig20093:2811..3209
orf19.1105_365	192.375	0.441653	0.202411	0.00531087	0.441653	0.843105	-1.18609	FLT down vs GRD	0.655244	1.88718	14.3651	1	orf19.1105_365	, , orf19.8701 | IPF26202.1 | Contig20093:2..511 , hypothetical protein			hypothetical protein	orf19.8701	IPF26202.1	Contig20093:2..511
orf19.1106_1760	305.25	0.550412	0.156761	0.685369	0.550412	1.28441	1.28441	FLT up vs GRD	0.388559	2.17749	0.176603	1	orf19.1106_1760	, , orf19.8703 | IPF26190.1 | Contig20093:7174..9624 , hypothetical protein			hypothetical protein	orf19.8703	IPF26190.1	Contig20093:7174..9624
orf19.1107_119	3064.19	7.24e-05	0.129408	0.0801982	7.24e-05	0.435002	-2.29884	FLT down vs GRD	55.5539	2.40528	4.01023	1	orf19.1107_119	, , orf19.8704 | IPF26199.1 | Contig20093:10533..11141 , conserved hypothetical protein			conserved hypothetical protein	orf19.8704	IPF26199.1	Contig20093:10533..11141
orf19.1108_456	2895	0.46208	0.151274	0.877224	0.46208	1.0989	1.0989	FLT up vs GRD	0.596612	2.21915	0.025442	1	orf19.1108_456	HAM1 , , orf19.8705 | IPF26200.1 | Contig20093:complement(11919..11311) , may function in DNA repair	HAM1		may function in DNA repair	orf19.8705	IPF26200.1	Contig20093:complement(11919..11311)
orf19.1109_155	1718.13	0.325593	0.034917	0.218291	0.325593	0.909488	-1.09952	FLT down vs GRD	1.09672	4.24947	1.785	1	orf19.1109_155	, , orf19.8706 | IPF26205.1 | Contig20093:complement(12673..12281) , hypothetical protein			hypothetical protein	orf19.8706	IPF26205.1	Contig20093:complement(12673..12281)
orf19.111_51	104	0.415573	0.284985	0.257214	0.415573	1.50639	1.50639	FLT up vs GRD	0.737099	1.51906	1.48835	1	orf19.111_51	CAN1 , , orf19.7758 | IPF27165.1 | Contig20035:complement(46853..45147) , arginine permease	CAN1		arginine permease	orf19.7758	IPF27165.1	Contig20035:complement(46853..45147)
orf19.1110_15	444	0.1296	0.654156	0.109809	0.1296	0.557697	-1.79309	FLT down vs GRD	2.85433	0.67555	3.23451	1	orf19.1110_15	THI80 , , orf19.8707 | IPF6335.2 | Contig20093:complement(14062..13082) , thiamin pyrophosphokinase	THI80		thiamin pyrophosphokinase	orf19.8707	IPF6335.2	Contig20093:complement(14062..13082)
orf19.1111_19	1183.69	0.942221	0.446816	0.0160559	0.942221	0.981508	-1.01884	FLT down vs GRD	0.00559291	1.06079	9.24344	1	orf19.1111_19	TAF9 , , orf19.8708 | IPF18669.1 | Contig20093:14265..14954 , TFIID and SAGA subunit	TAF9		TFIID and SAGA subunit	orf19.8708	IPF18669.1	Contig20093:14265..14954
orf19.1112_2071	1134	3.32e-06	0.023315	0.0496071	3.32e-06	0.257783	-3.87923	FLT down vs GRD	128.377	4.94172	5.34099	1	orf19.1112_2071	BUD7 , , orf19.8709 | IPF26191.1 | Contig20093:15304..17598 , involved in bud-site selection	BUD7		involved in bud-site selection	orf19.8709	IPF26191.1	Contig20093:15304..17598
orf19.1113_110	293.188	0.0726077	0.335877	0.46208	0.0726077	0.468525	-2.13436	FLT down vs GRD	4.27098	1.34907	0.596612	1	orf19.1113_110	, , orf19.8710 | IPF26197.1 | Contig20093:18071..18838 , hypothetical protein			hypothetical protein	orf19.8710	IPF26197.1	Contig20093:18071..18838
orf19.1114_248	2260	0.152004	0.00549077	0.0665012	0.152004	0.80846	-1.23692	FLT down vs GRD	2.50694	8.05922	4.50765	1	orf19.1114_248	, , orf19.8711 | IPF26204.1 | Contig20093:complement(19430..19029) , conserved hypothetical protein			conserved hypothetical protein	orf19.8711	IPF26204.1	Contig20093:complement(19430..19029)
orf19.1115_297	293.063	0.607215	0.086084	0.402251	0.607215	0.8677	-1.15247	FLT down vs GRD	0.286194	2.92162	0.782255	1	orf19.1115_297	GUK1 , , orf19.8712 | IPF26196.1 | Contig20093:complement(20592..19951) , guanylate kinase	GUK1		guanylate kinase	orf19.8712	IPF26196.1	Contig20093:complement(20592..19951)
orf19.1116_236	320	0.579939	0.949876	0.311307	0.579939	1.18353	1.18353	FLT up vs GRD	0.332696	0.2078	1.16803	1	orf19.1116_236	, , orf19.8713 | IPF26198.1 | Contig20093:21311..21937 , hypothetical protein			hypothetical protein	orf19.8713	IPF26198.1	Contig20093:21311..21937
orf19.1117_127	2041.5	0.00370553	0.00137082	0.703982	0.00370553	1.65808	1.65808	FLT up vs GRD	16.3689	12.2996	0.155117	1	orf19.1117_127	FDH3 , , orf19.8714 | IPF19255.2 | Contig20093:23115..24254 , formate dehydrogenase	FDH3		formate dehydrogenase	orf19.8714	IPF19255.2	Contig20093:23115..24254
orf19.1119_2112	811.188	0.574161	0.892426	0.160258	0.574161	0.836925	-1.19485	FLT down vs GRD	0.343161	0.311992	2.39571	1	orf19.1119_2112	MTR10 , , orf19.8717 | IPF13881.3 | Contig20093:25906..27558 , involved in nuclear protein import	MTR10		involved in nuclear protein import	orf19.8717	IPF13881.3	Contig20093:25906..27558
orf19.1120_153	1873.38	0.0038395	0.154551	0.571279	0.0038395	0.30406	-3.28883	FLT down vs GRD	16.1629	2.19406	0.348461	1	orf19.1120_153	, , orf19.8718 | IPF26203.1 | Contig20093:complement(28719..28255) , hypothetical protein			hypothetical protein	orf19.8718	IPF26203.1	Contig20093:complement(28719..28255)
orf19.1121_336	817.188	0.0795064	0.020822	0.00720157	0.0795064	1.60376	1.60376	FLT up vs GRD	4.03265	5.14791	12.8073	1	orf19.1121_336	, , orf19.8719 | IPF2329.1 | Contig20093:complement(32606..31782) , conserved hypothetical protein			conserved hypothetical protein	orf19.8719	IPF2329.1	Contig20093:complement(32606..31782)
orf19.1122_538	71.0625	0.108588	0.184708	0.284354	0.108588	0.153232	-6.52603	FLT down vs GRD	3.26087	1.9895	1.31662	1	orf19.1122_538	, , orf19.8720 | IPF2328.2 | Contig20093:complement(33963..33121) , hypothetical protein			hypothetical protein	orf19.8720	IPF2328.2	Contig20093:complement(33963..33121)
orf19.1123_201	18.5625	0.488125	0.149653	0.195108	0.488125	2.39487	2.39487	FLT up vs GRD	0.528095	2.23179	1.99908	1	orf19.1123_201	, , orf19.8721 | IPF26211.1 | Contig20093:34357..34713 , hypothetical protein			hypothetical protein	orf19.8721	IPF26211.1	Contig20093:34357..34713
orf19.1124.2	1494.56	0.777106	0.376138	0.551324	0.777106	1.05391	1.05391	FLT up vs GRD	0.0857477	1.23389	0.386741	1	orf19.1124.2	DPH52 , , orf19.8722.3 | IPF26215.1 | Contig20093:35992..36213 , diphthamide methyltransferase	DPH52		diphthamide methyltransferase	orf19.8722.3	IPF26215.1	Contig20093:35992..36213
orf19.1124_706	583.875	0.26927	0.00544116	0.494805	0.26927	1.17247	1.17247	FLT up vs GRD	1.40901	8.08249	0.511561	1	orf19.1124_706	, , orf19.8722 | IPF26195.1 | Contig20093:34795..35679 , phytanoyl-CoA dioxygenase (PhyH)			phytanoyl-CoA dioxygenase (PhyH)	orf19.8722	IPF26195.1	Contig20093:34795..35679
orf19.1125_371	1566.69	0.0167979	0.03494	0.00493136	0.0167979	0.703414	-1.42164	FLT down vs GRD	9.06377	4.2484	14.763	1	orf19.1125_371	, , , conserved hypothetical protein			conserved hypothetical protein
orf19.1126_31	10911.9	0.352217	0.138703	0.531508	0.352217	1.23165	1.23165	FLT up vs GRD	0.975594	2.32183	0.427609	1	orf19.1126_31	, , , hypothetical protein			hypothetical protein
orf19.1128_603	66.1875	0.264493	0.45985	0.99741	0.264493	2.15134	2.15134	FLT up vs GRD	1.43983	1.03202	1.12e-05	1	orf19.1128_603	MYO4 , , , class II myosin | myosin-1 isoform (type II myosin) heavy chain	MYO4		class II myosin | myosin-1 isoform (type II myosin) heavy chain
orf19.1129_268	511	0.931863	0.401893	0.0734521	0.931863	1.02378	1.02378	FLT up vs GRD	0.00778454	1.16708	4.24027	1	orf19.1129_268	SNF52 , , , chromatin remodeling Snf/Swi complex subunit	SNF52		chromatin remodeling Snf/Swi complex subunit
orf19.113_87	890.813	0.308235	0.743274	0.843206	0.308235	1.22557	1.22557	FLT up vs GRD	1.184	0.538508	0.0417464	1	orf19.113_87	CIP1 , , orf19.7761 | IPF11929.2 | Contig20035:complement(49427..48528) , closely related to cadmium-induced protein CIP1	CIP1		closely related to cadmium-induced protein CIP1	orf19.7761	IPF11929.2	Contig20035:complement(49427..48528)
orf19.1130_1708	1059.88	0.274173	0.941064	0.451761	0.274173	1.38478	1.38478	FLT up vs GRD	1.37818	0.225698	0.625665	1	orf19.1130_1708	, , orf19.8723 | IPF26187.1 | Contig20096:1228..3000 , hypothetical protein			hypothetical protein	orf19.8723	IPF26187.1	Contig20096:1228..3000
orf19.1133_2856	331	0.883973	0.131714	0.056202	0.883973	1.0511	1.0511	FLT up vs GRD	0.0226986	2.38391	4.97773	1	orf19.1133_2856	MSB1 , , orf19.8726 | IPF6172.3 | Contig20096:6055..9771 , polarity establishment and bud formation protein	MSB1		polarity establishment and bud formation protein	orf19.8726	IPF6172.3	Contig20096:6055..9771
orf19.1135_127	42.625	0.953833	0.176089	0.897336	0.953833	1.03325	1.03325	FLT up vs GRD	0.00356807	2.04364	0.0177384	1	orf19.1135_127	CKU70 , , orf19.8728 | IPF19699.2 | Contig20097:complement(3510..1075) , Ku family DNA binding and repair protein	CKU70		Ku family DNA binding and repair protein	orf19.8728	IPF19699.2	Contig20097:complement(3510..1075)
orf19.1136_8	330.313	0.155002	0.00292153	0.186851	0.155002	0.828094	-1.20759	FLT down vs GRD	2.46563	9.80788	2.0839	1	orf19.1136_8	APS2 , , orf19.8729 | IPF16570.2 | Contig20097:3778..4215 , similar to the AP-2 complex sigma2 subunit	APS2		similar to the AP-2 complex sigma2 subunit	orf19.8729	IPF16570.2	Contig20097:3778..4215
orf19.1137_415	412.688	0.706263	0.619714	0.194017	0.706263	0.813334	-1.22951	FLT down vs GRD	0.152596	0.731511	2.01	1	orf19.1137_415	CDC8 , , orf19.8730 | IPF16571.2 | Contig20097:complement(4951..4277) , thymidylate kinase	CDC8		thymidylate kinase	orf19.8730	IPF16571.2	Contig20097:complement(4951..4277)
orf19.1139_2753	2277.38	0.504218	0.457152	0.0206423	0.504218	0.911626	-1.09694	FLT down vs GRD	0.488944	1.03791	8.27058	1	orf19.1139_2753	SVL3 , , orf19.8732 | IPF17015.2 | Contig20097:8077..11007 , involved in vacuole function	SVL3		involved in vacuole function	orf19.8732	IPF17015.2	Contig20097:8077..11007
orf19.114_760	441.875	0.437249	0.10583	0.169726	0.437249	0.816587	-1.22461	FLT down vs GRD	0.668494	2.65431	2.27719	1	orf19.114_760	, , orf19.7762 | IPF19622.2 | Contig20035:complement(52932..50896) , hypothetical protein			hypothetical protein	orf19.7762	IPF19622.2	Contig20035:complement(52932..50896)
orf19.1140_86	1026.94	0.133806	0.0839784	0.399664	0.133806	0.75176	-1.33021	FLT down vs GRD	2.7833	2.9545	0.791307	1	orf19.1140_86	, , orf19.8733 | IPF17749.2 | Contig20097:11565..12191 , hypothetical protein			hypothetical protein	orf19.8733	IPF17749.2	Contig20097:11565..12191
orf19.1142_1841	326.5	0.00961786	0.126333	0.0056588	0.00961786	0.658485	-1.51864	FLT down vs GRD	11.4357	2.43449	14.0304	1	orf19.1142_1841	AVT4 , , orf19.8735 | IPF26160.1 | Contig20097:complement(14331..12412) , related to the neuronal GABA vesicular transporters	AVT4		related to the neuronal GABA vesicular transporters	orf19.8735	IPF26160.1	Contig20097:complement(14331..12412)
orf19.1143_1102	487.688	0.37308	0.107677	0.325302	0.37308	0.86348	-1.1581	FLT down vs GRD	0.890043	2.63246	1.09813	1	orf19.1143_1102	, , orf19.8736 | IPF26165.1 | Contig20097:complement(16515..15331) , hypothetical protein			hypothetical protein	orf19.8736	IPF26165.1	Contig20097:complement(16515..15331)
orf19.1144_3207	656.813	0.560181	0.696461	0.827917	0.560181	1.19125	1.19125	FLT up vs GRD	0.369406	0.609391	0.0504472	1	orf19.1144_3207	, , orf19.8737 | IPF26180.1 | Contig20097:complement(20905..16946) , conserved hypothetical protein			conserved hypothetical protein	orf19.8737	IPF26180.1	Contig20097:complement(20905..16946)
orf19.1146_176	180.25	0.330385	0.32607	0.786795	0.330385	1.57869	1.57869	FLT up vs GRD	1.07384	1.37946	0.0782385	1	orf19.1146_176	, , , hypothetical protein			hypothetical protein
orf19.1148_86	137.813	0.572006	0.141926	0.147504	0.572006	0.802546	-1.24603	FLT down vs GRD	0.347118	2.29446	2.57103	1	orf19.1148_86	, , orf19.8740 | IPF19912.1 | Contig20097:23570..24361 , hypothetical protein			hypothetical protein	orf19.8740	IPF19912.1	Contig20097:23570..24361
orf19.1149_1012	5418.63	0.236543	0.459457	0.00611612	0.236543	1.1263	1.1263	FLT up vs GRD	1.6374	1.03287	13.6279	1	orf19.1149_1012	ETR1 , , orf19.8742 | IPF11717.2 | Contig20097:25354..26433 , mitochondrialﾠ2-enoyl thioester reductase	ETR1		mitochondrial?2-enoyl thioester reductase	orf19.8742	IPF11717.2	Contig20097:25354..26433
orf19.115_143	237.625	0.262032	0.0855186	0.475077	0.262032	0.630161	-1.5869	FLT down vs GRD	1.45602	2.93035	0.561589	1	orf19.115_143	, , , hypothetical protein			hypothetical protein
orf19.1150.1	902.563	0.849785	0.178427	0.0191914	0.849785	0.973447	-1.02728	FLT down vs GRD	0.038267	2.02864	8.54622	1	orf19.1150.1	, , orf19.8743.2 | IPF26154.1 | Contig20097:29665..29886 , hypothetical protein			hypothetical protein	orf19.8743.2	IPF26154.1	Contig20097:29665..29886
orf19.1150_1086	538.875	0.731033	0.0167071	0.960347	0.731033	1.03425	1.03425	FLT up vs GRD	0.126749	5.5659	0.00263129	1	orf19.1150_1086	GLN32 , , orf19.8743 | IPF26163.1 | Contig20097:complement(28089..26671) , zinc finger transcription factor	GLN32		zinc finger transcription factor	orf19.8743	IPF26163.1	Contig20097:complement(28089..26671)
orf19.1151_144	10184.1	0.14313	0.0193689	0.601274	0.14313	1.3588	1.3588	FLT up vs GRD	2.63587	5.28279	0.295928	1	orf19.1151_144	, , orf19.8744 | IPF11713.1 | Contig20097:complement(30753..29956) , very weakly conserved hypothetical protein			very weakly conserved hypothetical protein	orf19.8744	IPF11713.1	Contig20097:complement(30753..29956)
orf19.1152_147	10028.8	0.0129023	0.0746386	0.620617	0.0129023	1.77784	1.77784	FLT up vs GRD	10.1435	3.11361	0.26501	1	orf19.1152_147	, , orf19.8744 | IPF11713.1 | Contig20097:complement(30753..29956) , hypothetical protein			hypothetical protein	orf19.8744	IPF11713.1	Contig20097:complement(30753..29956)
orf19.1153_1561	10583.5	0.663961	0.476242	0.156456	0.663961	0.941323	-1.06233	FLT down vs GRD	0.203403	0.996997	2.44597	1	orf19.1153_1561	GAD1 , , orf19.8745 | IPF11712.3 | Contig20097:complement(33560..31854) , glutamate decarboxylase	GAD1		glutamate decarboxylase	orf19.8745	IPF11712.3	Contig20097:complement(33560..31854)
orf19.1154_332	9929.44	0.0242874	0.175956	0.285437	0.0242874	0.752639	-1.32866	FLT down vs GRD	7.67428	2.04449	1.31026	1	orf19.1154_332	EGD1 , , orf19.8746 | IPF26175.1 | Contig20097:complement(35124..34651) , beta subunit of the nascent-polypeptide-associated complex (NAC)	EGD1		beta subunit of the nascent-polypeptide-associated complex (NAC)	orf19.8746	IPF26175.1	Contig20097:complement(35124..34651)
orf19.1155_507	558.125	0.135773	0.128654	0.096879	0.135773	0.732146	-1.36585	FLT down vs GRD	2.75109	2.41236	3.53507	1	orf19.1155_507	DPP3 , , orf19.8747 | IPF26170.1 | Contig20097:35822..36712 , vacuolar diacylglycerol pyrophosphate phosphatase	DPP3		vacuolar diacylglycerol pyrophosphate phosphatase	orf19.8747	IPF26170.1	Contig20097:35822..36712
orf19.1156_1037	122.063	0.232389	0.015376	0.177332	0.232389	1.29948	1.29948	FLT up vs GRD	1.66957	5.72941	2.18823	1	orf19.1156_1037	, , orf19.8748 | IPF26166.1 | Contig20097:37158..38312 , hypothetical protein			hypothetical protein	orf19.8748	IPF26166.1	Contig20097:37158..38312
orf19.1158_536	249.625	0.921822	0.0503621	0.404226	0.921822	0.970202	-1.03071	FLT down vs GRD	0.0102572	3.67669	0.775409	1	orf19.1158_536	, , orf19.8750 | IPF26169.1 | Contig20097:complement(39324..38371) , hypothetical protein			hypothetical protein	orf19.8750	IPF26169.1	Contig20097:complement(39324..38371)
orf19.1159_1053	1261.25	0.00595617	0.275202	0.00741389	0.00595617	0.50621	-1.97546	FLT down vs GRD	13.7643	1.55571	12.6649	1	orf19.1159_1053	MET23 , , orf19.8751 | IPF26162.1 | Contig20097:39499..40962 , homoserine O-acetyltransferase	MET23		homoserine O-acetyltransferase	orf19.8751	IPF26162.1	Contig20097:39499..40962
orf19.1160_234	1087.69	0.934115	0.025133	0.123206	0.934115	0.987704	-1.01245	FLT down vs GRD	0.00727697	4.8079	2.96832	1	orf19.1160_234	, , orf19.8752 | IPF26172.1 | Contig20097:complement(41667..41020) , conserved hypothetical protein			conserved hypothetical protein	orf19.8752	IPF26172.1	Contig20097:complement(41667..41020)
orf19.1161_4359	1067.56	0.00809111	0.123801	0.289847	0.00809111	0.586151	-1.70604	FLT down vs GRD	12.2429	2.4592	1.28471	1	orf19.1161_4359	SPO14 , , orf19.8753 | IPF13085.3 | Contig20097:complement(47109..41977) , phospholipase D	SPO14		phospholipase D	orf19.8753	IPF13085.3	Contig20097:complement(47109..41977)
orf19.1162.1	254.438	0.00458342	0.068976	0.463164	0.00458342	1.7884	1.7884	FLT up vs GRD	15.1631	3.22249	0.593627	1	orf19.1162.1	, , orf19.8755.1 | IPF26174.1 | Contig20097:complement(48829..48230) , conserved hypothetical protein			conserved hypothetical protein	orf19.8755.1	IPF26174.1	Contig20097:complement(48829..48230)
orf19.1162_313	2173.38	0.156629	0.0317924	0.513995	0.156629	1.14197	1.14197	FLT up vs GRD	2.44365	4.40424	0.466263	1	orf19.1162_313	, , orf19.8755 | IPF18931.2 | Contig20097:complement(48004..47627) , aromatic ring-cleaving dioxygenase			aromatic ring-cleaving dioxygenase	orf19.8755	IPF18931.2	Contig20097:complement(48004..47627)
orf19.1163_888	268.625	0.910852	0.315275	0.263902	0.910852	1.02607	1.02607	FLT up vs GRD	0.0133534	1.41412	1.4437	1	orf19.1163_888	, , orf19.8756 | IPF13079.1 | Contig20097:49005..50096 , conserved hypothetical protein			conserved hypothetical protein	orf19.8756	IPF13079.1	Contig20097:49005..50096
orf19.1164_215	2107.06	0.626862	0.658314	0.784951	0.626862	0.827977	-1.20776	FLT down vs GRD	0.255495	0.668932	0.0796385	1	orf19.1164_215	GAR1 , , orf19.8757 | IPF13076.1 | Contig20097:complement(50872..50282) , nucleolar rRNA processing protein	GAR1		nucleolar rRNA processing protein	orf19.8757	IPF13076.1	Contig20097:complement(50872..50282)
orf19.1166_1973	853.938	0.0717073	0.954782	0.0545934	0.0717073	1.75698	1.75698	FLT up vs GRD	4.30424	0.197321	5.06112	1	orf19.1166_1973	, , orf19.8759 | IPF26181.1 | Contig20097:51405..55262 , conserved hypothetical protein			conserved hypothetical protein	orf19.8759	IPF26181.1	Contig20097:51405..55262
orf19.1167_895	171.5	0.509571	0.381994	0.00115012	0.509571	1.22815	1.22815	FLT up vs GRD	0.476426	1.21827	24.3002	1	orf19.1167_895	, , orf19.8760 | IPF26164.1 | Contig20097:55853..57013 , alpha-ketoglutarate catabolism dioxygenase			alpha-ketoglutarate catabolism dioxygenase	orf19.8760	IPF26164.1	Contig20097:55853..57013
orf19.1168_438	2227.19	0.000401899	0.0467814	0.260834	0.000401899	1.85555	1.85555	FLT up vs GRD	33.7224	3.78808	1.46398	1	orf19.1168_438	, , , potential fungal Zn(2)-Cys(6) binuclear cluster domain DNA binding factor			potential fungal Zn(2)-Cys(6) binuclear cluster domain DNA binding factor
orf19.1169_859	1483.75	0.000512254	0.0824754	0.0932484	0.000512254	1.64843	1.64843	FLT up vs GRD	31.3223	2.9786	3.62898	1	orf19.1169_859	, , orf19.8762 | IPF26167.1 | Contig20097:58894..59844 , conserved hypothetical protein			conserved hypothetical protein	orf19.8762	IPF26167.1	Contig20097:58894..59844
orf19.117_1004	888.188	0.671227	0.150504	0.355836	0.671227	1.07653	1.07653	FLT up vs GRD	0.194051	2.22513	0.9602	1	orf19.117_1004	SEC9 , , orf19.7764 | IPF19868.1 | Contig20035:53635..55215 , plasma membrane t-SNARE	SEC9		plasma membrane t-SNARE	orf19.7764	IPF19868.1	Contig20035:53635..55215
orf19.1170_627	704.813	0.595679	0.934912	0.81404	0.595679	0.875919	-1.14166	FLT down vs GRD	0.305293	0.23762	0.0591007	1	orf19.1170_627	, , orf19.8763 | IPF26168.1 | Contig20097:60127..60933 , chorismate mutase			chorismate mutase	orf19.8763	IPF26168.1	Contig20097:60127..60933
orf19.1171_2175	105.125	0.617643	0.926641	0.627575	0.617643	1.34113	1.34113	FLT up vs GRD	0.269619	0.253056	0.254422	1	orf19.1171_2175	, , orf19.8764 | IPF26156.1 | Contig20097:62170..64668 , S-adenosylmethionine:diacylglycerol 3-amino-3-carboxypropyl transferase | lipid metabolism			S-adenosylmethionine:diacylglycerol 3-amino-3-carboxypropyl transferase | lipid metabolism	orf19.8764	IPF26156.1	Contig20097:62170..64668
orf19.1172_786	3474.06	0.454329	0.163106	0.0762369	0.454329	1.10402	1.10402	FLT up vs GRD	0.618329	2.13147	4.14213	1	orf19.1172_786	PHO84 , , orf19.8765 | IPF26171.1 | Contig20097:complement(66125..65439) , inorganic phosphate permease	PHO84		inorganic phosphate permease	orf19.8765	IPF26171.1	Contig20097:complement(66125..65439)
orf19.1173_1963	304	0.60609	0.137878	0.0200165	0.60609	1.15923	1.15923	FLT up vs GRD	0.28802	2.32896	8.38637	1	orf19.1173_1963	HUL5 , , , ubiquitin-protein ligase (E3)	HUL5		ubiquitin-protein ligase (E3)
orf19.1174_255	731.25	0.0492626	0.316338	0.740663	0.0492626	0.676776	-1.47759	FLT down vs GRD	5.36164	1.41065	0.117435	1	orf19.1174_255	DPH6 , , , diphthamide biosynthesis	DPH6		diphthamide biosynthesis
orf19.1175_228	62.625	0.733354	0.0409028	0.197604	0.733354	0.921147	-1.0856	FLT down vs GRD	0.124467	3.99594	1.9744	1	orf19.1175_228	, , orf19.8766 | IPF not available | Contig20099:47..400 , hypothetical protein			hypothetical protein	orf19.8766	IPF
orf19.1177_591	341.375	0.710204	0.12449	0.295376	0.710204	0.917438	-1.08999	FLT down vs GRD	0.148298	2.45242	1.25347	1	orf19.1177_591	RTT106 , , orf19.8769 | IPF26139.1 | Contig20099:1410..2639 , regulator of Ty1 transposition	RTT106		regulator of Ty1 transposition	orf19.8769	IPF26139.1	Contig20099:1410..2639
orf19.1178_228	239.813	0.275787	0.715662	0.863511	0.275787	1.70637	1.70637	FLT up vs GRD	1.36821	0.580086	0.0315139	1	orf19.1178_228	, , orf19.8768 | IPF18909.2 | Contig20099:complement(1322..717) , hypothetical protein			hypothetical protein	orf19.8768	IPF18909.2	Contig20099:complement(1322..717)
orf19.1179_222	7875.38	0.470121	0.638031	0.24041	0.470121	0.92393	-1.08233	FLT down vs GRD	0.574744	0.701481	1.60816	1	orf19.1179_222	, , orf19.8770 | IPF19608.1 | Contig20099:complement(3034..2477) , hypothetical protein			hypothetical protein	orf19.8770	IPF19608.1	Contig20099:complement(3034..2477)
orf19.118_1227	3279.69	0.0555672	0.757973	0.0718536	0.0555672	0.538769	-1.85608	FLT down vs GRD	5.01027	0.516568	4.2988	1	orf19.118_1227	ODD1 , , orf19.7765 | IPF14763.2 | Contig20035:57258..58568 , oleate delta-12 desaturase	ODD1		oleate delta-12 desaturase	orf19.7765	IPF14763.2	Contig20035:57258..58568
orf19.1180_904	924.438	0.00547656	0.693332	0.426206	0.00547656	0.513796	-1.9463	FLT down vs GRD	14.2024	0.614204	0.702721	1	orf19.1180_904	, , orf19.8771 | IPF13098.2 | Contig20099:3173..4420 , conserved hypothetical protein			conserved hypothetical protein	orf19.8771	IPF13098.2	Contig20099:3173..4420
orf19.1181_1024	155.625	0.299404	0.0745	0.0215363	0.299404	1.38614	1.38614	FLT up vs GRD	1.23124	3.11615	8.11265	1	orf19.1181_1024	DPP4 , , orf19.8772 | IPF13097.2 | Contig20099:4628..5716 , diacylglycerol pyrophosphate phosphatase	DPP4		diacylglycerol pyrophosphate phosphatase	orf19.8772	IPF13097.2	Contig20099:4628..5716
orf19.1182_57	260.188	0.612938	0.0733752	0.435309	0.612938	1.22514	1.22514	FLT up vs GRD	0.277019	3.137	0.674401	1	orf19.1182_57	VAM7 , , orf19.8773 | IPF13095.1 | Contig20099:complement(6604..5711) , vacuolar morphogenesis protein	VAM7		vacuolar morphogenesis protein	orf19.8773	IPF13095.1	Contig20099:complement(6604..5711)
orf19.1183_1507	2806.63	0.424397	0.420903	0.0696443	0.424397	0.893416	-1.1193	FLT down vs GRD	0.708468	1.12064	4.3825	1	orf19.1183_1507	, , orf19.8774 | IPF13094.1 | Contig20099:6748..8394 , conserved hypothetical protein			conserved hypothetical protein	orf19.8774	IPF13094.1	Contig20099:6748..8394
orf19.1185_833	1473.63	0.340006	0.508582	0.0269028	0.340006	0.833775	-1.19936	FLT down vs GRD	1.02937	0.931274	7.31214	1	orf19.1185_833	, , orf19.8776 | IPF13090.3 | Contig20099:9329..10462 , conserved hypothetical protein			conserved hypothetical protein	orf19.8776	IPF13090.3	Contig20099:9329..10462
orf19.1186_136	1280.25	0.00769564	0.0120854	0.170643	0.00769564	1.31201	1.31201	FLT up vs GRD	12.4837	6.22281	2.26618	1	orf19.1186_136	, , orf19.8777 | IPF13897.2 | Contig20099:10692..11330 , hypothetical protein			hypothetical protein	orf19.8777	IPF13897.2	Contig20099:10692..11330
orf19.1187_1941	3425.44	8.92e-07	0.0753886	0.217925	8.92e-07	2.19041	2.19041	FLT up vs GRD	181.059	3.09995	1.78813	1	orf19.1187_1941	CPH2 , CPH2 , orf19.8778 | IPF13893.3 | Contig20099:13102..15663 , bHLH DNA-binding protein that promotes hyphal development	CPH2	CPH2	bHLH DNA-binding protein that promotes hyphal development	orf19.8778	IPF13893.3	Contig20099:13102..15663
orf19.1189_1789	1844	0.0157626	0.344422	0.467781	0.0157626	1.85005	1.85005	FLT up vs GRD	9.31737	1.32339	0.581041	1	orf19.1189_1789	, , orf19.8780 | IPF19121.2 | Contig20099:20302..22356 , hypothetical protein			hypothetical protein	orf19.8780	IPF19121.2	Contig20099:20302..22356
orf19.119_529	109.313	0.537218	0.9493	0.515676	0.537218	0.593282	-1.68554	FLT down vs GRD	0.415529	0.209006	0.462445	1	orf19.119_529	STE14 , , orf19.7766 | IPF14764.1 | Contig20035:complement(59613..58816) , farnesyl cysteine-carboxyl methyltransferase	STE14		farnesyl cysteine-carboxyl methyltransferase	orf19.7766	IPF14764.1	Contig20035:complement(59613..58816)
orf19.1190_2478	1749.44	4.38e-05	0.0695388	0.0779246	4.38e-05	0.459855	-2.1746	FLT down vs GRD	63.949	3.21118	4.08488	1	orf19.1190_2478	VPH3 , , orf19.8781 | IPF9052.3 | Contig20099:complement(27215..24384) , vacuolar ATPase V0 domain subunit a	VPH3		vacuolar ATPase V0 domain subunit a	orf19.8781	IPF9052.3	Contig20099:complement(27215..24384)
orf19.1191_1950	1573.25	0.128825	0.93134	0.051335	0.128825	0.727761	-1.37408	FLT down vs GRD	2.86774	0.244362	5.24009	1	orf19.1191_1950	HRD3 , , orf19.8782 | IPF26127.1 | Contig20099:27709..30129 , responsible for ER-associated degradation (ERAD) of numerous ER-resident proteins	HRD3		responsible for ER-associated degradation (ERAD) of numerous ER-resident proteins	orf19.8782	IPF26127.1	Contig20099:27709..30129
orf19.1192_4082	492.75	0.444265	0.0844181	0.0125057	0.444265	0.916882	-1.09065	FLT down vs GRD	0.647489	2.94755	10.2762	1	orf19.1192_4082	DNA2 , , orf19.8783 | IPF26141.1 | Contig20099:complement(34462..30182) , DNA helicase involved in DNA replication	DNA2		DNA helicase involved in DNA replication	orf19.8783	IPF26141.1	Contig20099:complement(34462..30182)
orf19.1193_601	4883.5	0.376009	0.480627	0.348192	0.376009	1.27285	1.27285	FLT up vs GRD	0.878627	0.987832	0.993002	1	orf19.1193_601	GNP2 , , orf19.8784 | IPF7152.2 | Contig20099:complement(36659..34920) , high-affinity glutamine permease	GNP2		high-affinity glutamine permease	orf19.8784	IPF7152.2	Contig20099:complement(36659..34920)
orf19.1195_2286	1361.38	0.00357655	0.00125679	0.985948	0.00357655	0.747773	-1.3373	FLT down vs GRD	16.5762	12.6167	0.000330181	1	orf19.1195_2286	38626 , , orf19.8786 | IPF26128.1 | Contig20099:complement(40410..38191) , mitochondrial intermediate peptidase involved in protein import	38626		mitochondrial intermediate peptidase involved in protein import	orf19.8786	IPF26128.1	Contig20099:complement(40410..38191)
orf19.1196_1950	406.625	0.455567	0.0497906	0.542141	0.455567	0.735945	-1.3588	FLT down vs GRD	0.614815	3.6938	0.405313	1	orf19.1196_1950	, , orf19.8787 | IPF7158.2 | Contig20099:41450..44035 , conserved hypothetical protein with ser/thr kinase domain			conserved hypothetical protein with ser/thr kinase domain	orf19.8787	IPF7158.2	Contig20099:41450..44035
orf19.1198_218	1716.06	0.0352296	0.628326	0.432583	0.0352296	1.28703	1.28703	FLT up vs GRD	6.40328	0.717311	0.682778	1	orf19.1198_218	, , orf19.8789 | IPF7159.2 | Contig20099:complement(44773..44228) , conserved hypothetical protein			conserved hypothetical protein	orf19.8789	IPF7159.2	Contig20099:complement(44773..44228)
orf19.1199_622	2792.19	0.277919	0.211001	0.53898	0.277919	1.13551	1.13551	FLT up vs GRD	1.35515	1.84129	0.411852	1	orf19.1199_622	NOP58 , , orf19.8790 | IPF18691.2 | Contig20099:complement(46565..45018) , part of small (ribosomal) subunit (SSU) processosome; U3 snoRNP protein	NOP58		part of small (ribosomal) subunit (SSU) processosome; U3 snoRNP protein	orf19.8790	IPF18691.2	Contig20099:complement(46565..45018)
orf19.1200_923	397.875	0.764084	0.420774	0.386748	0.764084	1.11869	1.11869	FLT up vs GRD	0.0964378	1.12095	0.837934	1	orf19.1200_923	, , orf19.8791 | IPF26140.1 | Contig20099:complement(48025..47030) , hypothetical protein			hypothetical protein	orf19.8791	IPF26140.1	Contig20099:complement(48025..47030)
orf19.1201_1280	939.313	0.803313	0.230004	0.757705	0.803313	0.943487	-1.0599	FLT down vs GRD	0.0662921	1.74717	0.101929	1	orf19.1201_1280	DIA4 , , orf19.8792 | IPF26135.1 | Contig20099:48144..49571 , similar to bacterial seryl-tRNA synthases	DIA4		similar to bacterial seryl-tRNA synthases	orf19.8792	IPF26135.1	Contig20099:48144..49571
orf19.1202_1262	202.25	0.695491	0.0467114	0.0271311	0.695491	0.923187	-1.0832	FLT down vs GRD	0.164714	3.79037	7.28266	1	orf19.1202_1262	, , orf19.8793 | IPF26137.1 | Contig20099:complement(50952..49618) , hypothetical protein			hypothetical protein	orf19.8793	IPF26137.1	Contig20099:complement(50952..49618)
orf19.1203.1	4409.88	9.57e-05	0.176803	0.864373	9.57e-05	0.382311	-2.61567	FLT down vs GRD	51.3275	2.03903	0.0311126	1	orf19.1203.1	, , orf19.8794.1 | IPF26149.1 | Contig20099:54808..55035 , conserved hypothetical protein			conserved hypothetical protein	orf19.8794.1	IPF26149.1	Contig20099:54808..55035
orf19.1203_2646	487	0.591896	0.393533	0.0252018	0.591896	0.83358	-1.19964	FLT down vs GRD	0.311735	1.18824	7.54228	1	orf19.1203_2646	SRO77 , , orf19.8794 | IPF26148.1 | Contig20099:complement(54394..51182) , suppressor of defect in the small GTPase Rho3p	SRO77		suppressor of defect in the small GTPase Rho3p	orf19.8794	IPF26148.1	Contig20099:complement(54394..51182)
orf19.1204_1464	701.625	0.0400833	0.294622	0.256402	0.0400833	0.804737	-1.24264	FLT down vs GRD	5.991	1.48434	1.49388	1	orf19.1204_1464	APM3 , , orf19.8795 | IPF26134.1 | Contig20099:complement(56737..55169) , clathrin associated AP-3 protein complex, medium subunit	APM3		clathrin associated AP-3 protein complex, medium subunit	orf19.8795	IPF26134.1	Contig20099:complement(56737..55169)
orf19.1206_240	566.188	0.0823378	0.0280214	0.484756	0.0823378	0.752823	-1.32833	FLT down vs GRD	3.94243	4.61824	0.536589	1	orf19.1206_240	FET34 , , orf19.8797 | IPF26138.1 | Contig20099:complement(58460..57240) , iron transport multicopper oxidase	FET34		iron transport multicopper oxidase	orf19.8797	IPF26138.1	Contig20099:complement(58460..57240)
orf19.1207_266	378.063	0.488981	0.0936193	0.0782481	0.488981	1.21828	1.21828	FLT up vs GRD	0.525953	2.81152	4.07408	1	orf19.1207_266	, , , hypothetical protein			hypothetical protein
orf19.1208_1215	400.938	0.263155	0.806175	0.897264	0.263155	1.48718	1.48718	FLT up vs GRD	1.44861	0.444926	0.0177634	1	orf19.1208_1215	MRS512 , , , involved in fungal induction	MRS512		involved in fungal induction
orf19.1209_30	323.063	0.844534	0.0115452	0.00112244	0.844534	0.9759	-1.0247	FLT down vs GRD	0.0410316	6.31983	24.4916	1	orf19.1209_30	, , orf19.8798 | IPF26122.1 | Contig20101:1..372 , hypothetical protein			hypothetical protein	orf19.8798	IPF26122.1	Contig20101:1..372
orf19.121_207	1164	0.00797514	0.0493566	0.210528	0.00797514	0.550323	-1.81711	FLT down vs GRD	12.3119	3.70695	1.85307	1	orf19.121_207	ARC18 , , orf19.7768 | IPF27178.1 | Contig20035:complement(61244..60696) , subunit of the Arp2/3 complex	ARC18		subunit of the Arp2/3 complex	orf19.7768	IPF27178.1	Contig20035:complement(61244..60696)
orf19.1210_1274	1007.19	0.0898788	0.433883	0.121089	0.0898788	0.699343	-1.42991	FLT down vs GRD	3.7205	1.0902	3.00778	1	orf19.1210_1274	AVT6 , , orf19.8799 | IPF26117.1 | Contig20101:complement(2051..519) , vacuolar amino acid transporter	AVT6		vacuolar amino acid transporter	orf19.8799	IPF26117.1	Contig20101:complement(2051..519)
orf19.1212_1033	3430.44	0.0165194	0.0198462	0.203229	0.0165194	0.701898	-1.42471	FLT down vs GRD	9.13002	5.23714	1.92029	1	orf19.1212_1033	SCS2 , , orf19.8800 | IPF9515.2 | Contig20101:complement(4356..3247) , required for inositol metabolism	SCS2		required for inositol metabolism	orf19.8800	IPF9515.2	Contig20101:complement(4356..3247)
orf19.1214_1210	2932.75	0.0192828	0.0128478	0.0610832	0.0192828	0.658291	-1.51908	FLT down vs GRD	8.52808	6.09471	4.74228	1	orf19.1214_1210	MAP2 , , orf19.8802 | IPF26119.1 | Contig20101:complement(8228..6885) , methionine aminopeptidase, isoform 2	MAP2		methionine aminopeptidase, isoform 2	orf19.8802	IPF26119.1	Contig20101:complement(8228..6885)
orf19.1215_1234	226.75	0.578535	0.0952693	0.0688471	0.578535	0.856112	-1.16807	FLT down vs GRD	0.335219	2.78886	4.41354	1	orf19.1215_1234	, , orf19.8803 | IPF9510.2 | Contig20101:9265..10608 , hypothetical protein			hypothetical protein	orf19.8803	IPF9510.2	Contig20101:9265..10608
orf19.1217_2563	1241.69	0.00254999	0.00523529	0.0433198	0.00254999	0.71802	-1.39272	FLT down vs GRD	18.6525	8.18196	5.74983	1	orf19.1217_2563	, , orf19.8806 | IPF9507.2 | Contig20101:complement(15178..10709) , conserved hypothetical protein			conserved hypothetical protein	orf19.8806	IPF9507.2	Contig20101:complement(15178..10709)
orf19.1219_931	23.4375	0.853586	0.0830466	0.0899865	0.853586	0.850806	-1.17536	FLT down vs GRD	0.0363287	2.96938	3.7175	1	orf19.1219_931	, , , conserved hypothetical protein			conserved hypothetical protein
orf19.122_1492	144.875	0.485345	0.788567	0.308157	0.485345	0.826227	-1.21032	FLT down vs GRD	0.535096	0.471105	1.1844	1	orf19.122_1492	CDC20 , , orf19.7769 | IPF13908.2 | Contig20035:63359..65335 , anaphase promoting complex (APC) subunit	CDC20		anaphase promoting complex (APC) subunit	orf19.7769	IPF13908.2	Contig20035:63359..65335
orf19.1220_726	1827	0.645844	0.979769	0.907835	0.645844	1.08519	1.08519	FLT up vs GRD	0.227916	0.133996	0.0142773	1	orf19.1220_726	RVS167 , , orf19.8807 | IPF26118.1 | Contig20101:15540..16862 , cytoskeletal binding and regulatory protein	RVS167		cytoskeletal binding and regulatory protein	orf19.8807	IPF26118.1	Contig20101:15540..16862
orf19.1221_791	484.688	0.025779	0.0995822	0.60807	0.025779	0.607692	-1.64557	FLT down vs GRD	7.46204	2.73181	0.28481	1	orf19.1221_791	ALG2 , , orf19.8808 | IPF26120.1 | Contig20101:complement(18369..17083) , mannosyltransferase	ALG2		mannosyltransferase	orf19.8808	IPF26120.1	Contig20101:complement(18369..17083)
orf19.1222_2667	430.313	0.14524	0.0124085	0.0291307	0.14524	0.815051	-1.22692	FLT down vs GRD	2.60427	6.16733	7.03715	1	orf19.1222_2667	ELP1 , , , RNA polymerase II Elongator subunit	ELP1		RNA polymerase II Elongator subunit
orf19.1223_1545	387.438	0.768148	0.578004	0.348655	0.768148	0.880945	-1.13514	FLT down vs GRD	0.093027	0.80255	0.990983	1	orf19.1223_1545	DBF2 , , orf19.8809 | IPF26112.1 | Contig20103:complement(2262..130) , kinase required for late nuclear division	DBF2		kinase required for late nuclear division	orf19.8809	IPF26112.1	Contig20103:complement(2262..130)
orf19.1224_320	684.875	0.18204	0.0067966	0.050516	0.18204	1.46639	1.46639	FLT up vs GRD	2.13571	7.52695	5.28736	1	orf19.1224_320	ADY2 , , orf19.8810 | IPF13846.3 | Contig20103:7379..8230 , putative transmembrane transporter	ADY2		putative transmembrane transporter	orf19.8810	IPF13846.3	Contig20103:7379..8230
orf19.1225_16	1913.56	0.0219712	0.0330226	0.707808	0.0219712	0.702408	-1.42367	FLT down vs GRD	8.03878	4.34115	0.150902	1	orf19.1225_16	, , orf19.8811 | IPF26113.1 | Contig20103:complement(9850..9227) , hypothetical protein			hypothetical protein	orf19.8811	IPF26113.1	Contig20103:complement(9850..9227)
orf19.1226_1603	2116.38	0.0108533	0.701896	0.795292	0.0108533	0.532018	-1.87964	FLT down vs GRD	10.8922	0.601056	0.0719595	1	orf19.1226_1603	, , orf19.8812 | IPF26069.1 | Contig20104:181..1695 , conserved hypothetical protein			conserved hypothetical protein	orf19.8812	IPF26069.1	Contig20104:181..1695
orf19.1227_161	205.375	0.351629	0.581246	0.258994	0.351629	1.19846	1.19846	FLT up vs GRD	0.97812	0.796882	1.47631	1	orf19.1227_161	, , orf19.8813 | IPF26088.1 | Contig20104:2238..2828 , hypothetical protein			hypothetical protein	orf19.8813	IPF26088.1	Contig20104:2238..2828
orf19.1228_505	833.75	0.745467	0.439064	0.0461897	0.745467	0.915359	-1.09247	FLT down vs GRD	0.112939	1.07831	5.55442	1	orf19.1228_505	HAP2 , , orf19.8814 | IPF18396.2 | Contig20104:3941..5032 , global regulator of respiratory genes	HAP2		global regulator of respiratory genes	orf19.8814	IPF18396.2	Contig20104:3941..5032
orf19.1229_2148	802.813	0.47898	0.068912	0.790529	0.47898	1.16445	1.16445	FLT up vs GRD	0.5514	3.22378	0.0754442	1	orf19.1229_2148	CSE1 , , orf19.8815 | IPF16520.2 | Contig20104:complement(7227..5605) | orf19.8816 | IPF26077.1 | Contig20104:complement(8738..7380) , specific exportin for Srp1p	CSE1		specific exportin for Srp1p	orf19.8815	IPF16520.2	Contig20104:complement(7227..5605)
orf19.123_345	257.813	0.646339	0.0228216	0.623068	0.646339	0.928403	-1.07712	FLT down vs GRD	0.227222	4.98029	0.261248	1	orf19.123_345	, , orf19.7770 | IPF13909.1 | Contig20035:66002..66613 , hypothetical protein			hypothetical protein	orf19.7770	IPF13909.1	Contig20035:66002..66613
orf19.1232_57	2867.19	0.169109	0.327517	0.270362	0.169109	0.731704	-1.36667	FLT down vs GRD	2.28464	1.37491	1.40208	1	orf19.1232_57	VRG4 , , orf19.8817 | IPF26079.1 | Contig20104:complement(11354..10014) , GDP-mannose transporter into the lumen of the Golgi	VRG4		GDP-mannose transporter into the lumen of the Golgi	orf19.8817	IPF26079.1	Contig20104:complement(11354..10014)
orf19.1233_1278	3040.94	0.00685922	0.430325	0.20024	0.00685922	0.59753	-1.67356	FLT down vs GRD	13.0484	1.09845	1.94878	1	orf19.1233_1278	ADE4 , , orf19.8818 | IPF26073.1 | Contig20104:complement(14532..12907) , amidophosphoribosyltransferase	ADE4		amidophosphoribosyltransferase	orf19.8818	IPF26073.1	Contig20104:complement(14532..12907)
orf19.1234_1302	495.75	0.451101	0.272119	0.628078	0.451101	1.20352	1.20352	FLT up vs GRD	0.62756	1.56757	0.253668	1	orf19.1234_1302	, , orf19.8819 | IPF26070.1 | Contig20104:27121..28659 , hypothetical protein			hypothetical protein	orf19.8819	IPF26070.1	Contig20104:27121..28659
orf19.1235_327	564.063	0.0958994	0.0188626	0.048166	0.0958994	1.43767	1.43767	FLT up vs GRD	3.55995	5.33277	5.42863	1	orf19.1235_327	HOM3 , , orf19.8820 | IPF26072.1 | Contig20104:32629..34263 , aspartate kinase (L-aspartate 4-P- transferase)	HOM3		aspartate kinase (L-aspartate 4-P- transferase)	orf19.8820	IPF26072.1	Contig20104:32629..34263
orf19.1236_377	1061.31	0.424616	0.674666	0.0652599	0.424616	1.20262	1.20262	FLT up vs GRD	0.707773	0.643167	4.55918	1	orf19.1236_377	, , orf19.8821 | IPF14676.2 | Contig20104:complement(35455..34490) , conserved hypothetical protein			conserved hypothetical protein	orf19.8821	IPF14676.2	Contig20104:complement(35455..34490)
orf19.1237_1054	740.75	0.0304408	0.234777	0.210015	0.0304408	1.70874	1.70874	FLT up vs GRD	6.88758	1.72496	1.85769	1	orf19.1237_1054	ARO9 , , orf19.8822 | IPF14677.1 | Contig20104:complement(37474..35903) , aromatic amino acid aminotransferase II	ARO9		aromatic amino acid aminotransferase II	orf19.8822	IPF14677.1	Contig20104:complement(37474..35903)
orf19.1238_977	3.9375	0.459347	0.414803	0.312436	0.459347	0.320673	-3.11844	FLT down vs GRD	0.604198	1.1353	1.16222	1	orf19.1238_977	TUB4 , , orf19.8823 | IPF26076.1 | Contig20104:complement(39359..37878) , gamma tubulin	TUB4		gamma tubulin	orf19.8823	IPF26076.1	Contig20104:complement(39359..37878)
orf19.1239_130	330.5	0.687816	0.624759	0.388396	0.687816	1.20603	1.20603	FLT up vs GRD	0.173684	0.723174	0.831847	1	orf19.1239_130	, , orf19.8824 | IPF12540.1 | Contig20104:complement(41409..40423) , hypothetical protein			hypothetical protein	orf19.8824	IPF12540.1	Contig20104:complement(41409..40423)
orf19.124_79	1527.63	0.0587659	0.317836	0.739433	0.0587659	0.817073	-1.22388	FLT down vs GRD	4.85093	1.40578	0.118603	1	orf19.124_79	CIC1 , , orf19.7771 | IPF27169.1 | Contig20035:67104..68201 , protease substrate recruitment factor	CIC1		protease substrate recruitment factor	orf19.7771	IPF27169.1	Contig20035:67104..68201
orf19.1240_8065	1846.13	0.431359	0.81758	0.312	0.431359	1.09823	1.09823	FLT up vs GRD	0.686568	0.427905	1.16446	1	orf19.1240_8065	, , orf19.8825 | IPF26084.1 | Contig20104:43851..51962 , conserved hypothetical protein			conserved hypothetical protein	orf19.8825	IPF26084.1	Contig20104:43851..51962
orf19.1244_2754	713.813	0.800863	0.332099	0.248832	0.800863	1.13866	1.13866	FLT up vs GRD	0.0679965	1.36065	1.54668	1	orf19.1244_2754	GYP2 , , orf19.8829 | IPF26053.1 | Contig20104:53079..55907 , GTPase activating protein (GAP) for Ypt6 and Mac1 intercting protein	GYP2		GTPase activating protein (GAP) for Ypt6 and Mac1 intercting protein	orf19.8829	IPF26053.1	Contig20104:53079..55907
orf19.1246_2907	2201.81	0.0211059	0.0188304	0.0727343	0.0211059	0.688321	-1.45281	FLT down vs GRD	8.18761	5.33601	4.26635	1	orf19.1246_2907	, , orf19.8830 | IPF15574.3 | Contig20104:complement(59261..56256) , hypothetical protein			hypothetical protein	orf19.8830	IPF15574.3	Contig20104:complement(59261..56256)
orf19.1247_282	764.625	0.158762	0.172407	0.284259	0.158762	1.48123	1.48123	FLT up vs GRD	2.4153	2.06773	1.31718	1	orf19.1247_282	, , orf19.8831 | IPF15575.2 | Contig20104:complement(60307..59846) , hypothetical protein			hypothetical protein	orf19.8831	IPF15575.2	Contig20104:complement(60307..59846)
orf19.1248_163	2350.13	0.115691	0.367789	0.950238	0.115691	1.2719	1.2719	FLT up vs GRD	3.11266	1.25662	0.00414635	1	orf19.1248_163	RPB3 , , orf19.8832 | IPF15576.2 | Contig20104:60541..61497 , 45 kDa subunit of RNA polymerase II	RPB3		45 kDa subunit of RNA polymerase II	orf19.8832	IPF15576.2	Contig20104:60541..61497
orf19.1249_773	753.188	0.0530652	0.182027	0.690577	0.0530652	0.633892	-1.57756	FLT down vs GRD	5.14331	2.00601	0.170424	1	orf19.1249_773	HIS6 , , orf19.8833 | IPF26083.1 | Contig20104:complement(62406..61567) , phosphoribosyl-5-amino-1-phosphoribosyl-4-imidazolecarboxiamide isomerase	HIS6		phosphoribosyl-5-amino-1-phosphoribosyl-4-imidazolecarboxiamide isomerase	orf19.8833	IPF26083.1	Contig20104:complement(62406..61567)
orf19.125_226	423.5	0.349118	0.464716	0.612317	0.349118	1.38108	1.38108	FLT up vs GRD	0.988971	1.02149	0.278004	1	orf19.125_226	EBP1 , , orf19.7772 | IPF7044.2 | Contig20035:complement(69677..68454) , NADH:flavin oxidoreductase (old yellow enzyme)	EBP1		NADH:flavin oxidoreductase (old yellow enzyme)	orf19.7772	IPF7044.2	Contig20035:complement(69677..68454)
orf19.1250_364	488.375	0.674314	0.206698	0.0459277	0.674314	1.09069	1.09069	FLT up vs GRD	0.190157	1.864	5.57161	1	orf19.1250_364	, , orf19.8834 | IPF26082.1 | Contig20104:62610..63596 , conserved hypothetical protein			conserved hypothetical protein	orf19.8834	IPF26082.1	Contig20104:62610..63596
orf19.1251_2070	522.875	0.238881	0.0265154	0.130319	0.238881	0.790436	-1.26512	FLT down vs GRD	1.61964	4.71393	2.84198	1	orf19.1251_2070	BRN1 , , orf19.8835 | IPF26062.1 | Contig20104:complement(65869..63632) , functional homologue of human BRRN1 involved in chromosome segregation	BRN1		functional homologue of human BRRN1 involved in chromosome segregation	orf19.8835	IPF26062.1	Contig20104:complement(65869..63632)
orf19.1252_1958	8406.88	0.0155111	0.584496	0.0223356	0.0155111	1.6212	1.6212	FLT up vs GRD	9.38214	0.791225	7.97828	1	orf19.1252_1958	YME1 , , orf19.8836 | IPF26065.1 | Contig20104:67978..70116 , mitochondrial protein of the CDC48/PAS1/SEC18 family of ATPases	YME1		mitochondrial protein of the CDC48/PAS1/SEC18 family of ATPases	orf19.8836	IPF26065.1	Contig20104:67978..70116
orf19.1253_1616	1484.25	0.553967	0.740123	0.881574	0.553967	1.12023	1.12023	FLT up vs GRD	0.381511	0.543226	0.0236554	1	orf19.1253_1616	PHO4 , , orf19.8838 | IPF14649.2 | Contig20104:71917..73896 , myc-family transcription factor	PHO4		myc-family transcription factor	orf19.8838	IPF14649.2	Contig20104:71917..73896
orf19.1254_2202	2772.56	0.00181407	0.747257	0.331593	0.00181407	0.538271	-1.8578	FLT down vs GRD	20.9298	0.532553	1.06815	1	orf19.1254_2202	SEC23 , , orf19.8839 | IPF26061.1 | Contig20104:74416..76704 , component of COPII coat of ER- golgi vesicles	SEC23		component of COPII coat of ER- golgi vesicles	orf19.8839	IPF26061.1	Contig20104:74416..76704
orf19.1255_1151	48.4375	0.823528	0.663408	0.601209	0.823528	1.19672	1.19672	FLT up vs GRD	0.053106	0.660863	0.296035	1	orf19.1255_1151	, , orf19.8841 | IPF26057.1 | Contig20104:78668..81058 | orf19.8842 | IPF26091.1 | Contig20104:81059..81586 , hypothetical protein with zinc finger domain			hypothetical protein with zinc finger domain	orf19.8841	IPF26057.1	Contig20104:78668..81058
orf19.1257_86	135.938	0.41319	0.372121	0.608608	0.41319	0.596538	-1.67634	FLT down vs GRD	0.745001	1.24476	0.283942	1	orf19.1257_86	, , , hypothetical protein			hypothetical protein
orf19.1258_153	358.375	0.714414	0.34383	0.167819	0.714414	0.903018	-1.1074	FLT down vs GRD	0.143785	1.32514	2.30033	1	orf19.1258_153	, , orf19.8843 | IPF15051.2 | Contig20104:86146..86859 , hypothetical protein			hypothetical protein	orf19.8843	IPF15051.2	Contig20104:86146..86859
orf19.1259_3706	1315.31	0.733911	0.974805	0.239357	0.733911	0.916975	-1.09054	FLT down vs GRD	0.123923	0.148536	1.61606	1	orf19.1259_3706	SNT2 , , orf19.8844 | IPF26095.1 | Contig20104:complement(91368..87037) , conserved hypothetical protein	SNT2		conserved hypothetical protein	orf19.8844	IPF26095.1	Contig20104:complement(91368..87037)
orf19.1260_74	851.563	0.664719	0.249058	0.546217	0.664719	0.940761	-1.06297	FLT down vs GRD	0.202415	1.66153	0.396994	1	orf19.1260_74	LEA1 , , orf19.8845 | IPF26087.1 | Contig20104:complement(92680..91979) , similar to human U2AsnRNP protein	LEA1		similar to human U2AsnRNP protein	orf19.8845	IPF26087.1	Contig20104:complement(92680..91979)
orf19.1261_977	501.5	0.765822	0.236397	0.0239878	0.765822	1.05634	1.05634	FLT up vs GRD	0.094971	1.71754	7.71889	1	orf19.1261_977	CEG1 , , orf19.8846 | IPF26081.1 | Contig20104:93018..94274 | orf19.8845.1 | IPF18334.2 | Contig20104:92926..93084 , mRNA capping enzyme alpha subunit and guanylyltransferase	CEG1		mRNA capping enzyme alpha subunit and guanylyltransferase	orf19.8846	IPF26081.1	Contig20104:93018..94274
orf19.1263_1875	263.063	0.592683	0.851521	0.476772	0.592683	0.716868	-1.39496	FLT down vs GRD	0.310388	0.376584	0.557146	1	orf19.1263_1875	FRE1 , , orf19.8848 | IPF26060.1 | Contig20104:complement(96787..94505) , ferric reductase	FRE1		ferric reductase	orf19.8848	IPF26060.1	Contig20104:complement(96787..94505)
orf19.1264_739	38.375	0.167896	0.610549	0.665977	0.167896	0.198762	-5.03115	FLT down vs GRD	2.2994	0.746787	0.200782	1	orf19.1264_739	FRE2 , , orf19.8849 | IPF26059.1 | Contig20104:complement(101447..99231) , ferric reductase	FRE2		ferric reductase	orf19.8849	IPF26059.1	Contig20104:complement(101447..99231)
orf19.1265_3492	336.75	0.056664	0.835321	0.119665	0.056664	0.473789	-2.11064	FLT down vs GRD	4.95434	0.401239	3.03486	1	orf19.1265_3492	TRS130 , , orf19.8850 | IPF26103.1 | Contig20104:104835..108629 , targeting complex (TRAPP) component involved in ER to Golgi membrane traffic	TRS130		targeting complex (TRAPP) component involved in ER to Golgi membrane traffic	orf19.8850	IPF26103.1	Contig20104:104835..108629
orf19.1266_264	715	0.729086	0.243148	0.980567	0.729086	0.949131	-1.0536	FLT down vs GRD	0.128681	1.68725	0.000631528	1	orf19.1266_264	, , orf19.8852 | IPF10280.1 | Contig20104:complement(109781..109464) , hypothetical protein			hypothetical protein	orf19.8852	IPF10280.1	Contig20104:complement(109781..109464)
orf19.1267.1	3144.75	0.0195673	0.728692	0.112973	0.0195673	1.59245	1.59245	FLT up vs GRD	8.47233	0.560395	3.16793	1	orf19.1267.1	, , orf19.8853.1 | IPF26052.1 | Contig20104:112374..112640 , conserved hypothetical protein			conserved hypothetical protein	orf19.8853.1	IPF26052.1	Contig20104:112374..112640
orf19.1267_184	1383.63	0.394207	0.726222	0.433648	0.394207	1.18348	1.18348	FLT up vs GRD	0.810707	0.564116	0.679495	1	orf19.1267_184	CAJ1 , , orf19.8853 | IPF10278.2 | Contig20104:110637..112022 , similar to E. coli DnaJ	CAJ1		similar to E. coli DnaJ	orf19.8853	IPF10278.2	Contig20104:110637..112022
orf19.1268_230	127.25	0.0170516	0.318313	0.236815	0.0170516	2.187	2.187	FLT up vs GRD	9.00464	1.40423	1.63532	1	orf19.1268_230	, , orf19.8854 | IPF26094.1 | Contig20104:112751..113194 , hypothetical protein			hypothetical protein	orf19.8854	IPF26094.1	Contig20104:112751..113194
orf19.1270_1310	461.5	0.157289	0.0409	0.113328	0.157289	1.31963	1.31963	FLT up vs GRD	2.43482	3.99605	3.16061	1	orf19.1270_1310	FRE3 , , orf19.8856 | IPF26063.1 | Contig20104:113536..115716 , ferric reductase	FRE3		ferric reductase	orf19.8856	IPF26063.1	Contig20104:113536..115716
orf19.1272_1165	738.375	0.80307	0.128791	0.382623	0.80307	1.05219	1.05219	FLT up vs GRD	0.06646	2.41107	0.853351	1	orf19.1272_1165	, , orf19.8858 | IPF26080.1 | Contig20104:complement(117238..116000) , conserved hypothetical protein			conserved hypothetical protein	orf19.8858	IPF26080.1	Contig20104:complement(117238..116000)
orf19.1273_35	921.25	0.906024	0.237846	0.56346	0.906024	1.02325	1.02325	FLT up vs GRD	0.0148471	1.71095	0.36313	1	orf19.1273_35	GIM3 , , orf19.8859 | IPF10269.1 | Contig20104:118064..118456 , prefoldin subunit 4	GIM3		prefoldin subunit 4	orf19.8859	IPF10269.1	Contig20104:118064..118456
orf19.1274_704	457.313	0.655962	0.0668411	0.745815	0.655962	0.869277	-1.15038	FLT down vs GRD	0.214014	3.26642	0.112618	1	orf19.1274_704	, , , hypothetical protein			hypothetical protein
orf19.1275_1916	1251.13	0.560285	0.0158956	0.555851	0.560285	1.07022	1.07022	FLT up vs GRD	0.369206	5.66356	0.377812	1	orf19.1275_1916	GAT1 , , orf19.8862 | IPF26064.1 | Contig20104:124199..126202 , activator of transcription of nitrogen-regulated genes	GAT1		activator of transcription of nitrogen-regulated genes	orf19.8862	IPF26064.1	Contig20104:124199..126202
orf19.1276_390	884.313	0.445254	0.021358	0.466155	0.445254	0.789509	-1.26661	FLT down vs GRD	0.644575	5.10108	0.585448	1	orf19.1276_390	, , orf19.8863 | IPF26090.1 | Contig20104:126673..127179 , weakly conserved hypothetical protein			weakly conserved hypothetical protein	orf19.8863	IPF26090.1	Contig20104:126673..127179
orf19.1277_1084	2584.38	0.000149275	0.528242	0.96312	0.000149275	4.75544	4.75544	FLT up vs GRD	45.1862	0.893262	0.00227585	1	orf19.1277_1084	, , orf19.8864 | IPF19348.2 | Contig20104:complement(128818..127409) , hypothetical protein			hypothetical protein	orf19.8864	IPF19348.2	Contig20104:complement(128818..127409)
orf19.1278_139	400.063	0.000974233	0.0637695	0.566916	0.000974233	0.481248	-2.07793	FLT down vs GRD	25.6271	3.33276	0.356596	1	orf19.1278_139	, , orf19.8865 | IPF26100.1 | Contig20104:complement(131715..131473) , conserved hypothetical protein			conserved hypothetical protein	orf19.8865	IPF26100.1	Contig20104:complement(131715..131473)
orf19.1279_1104	1720.25	0.00607862	0.0828067	0.260117	0.00607862	0.543842	-1.83877	FLT down vs GRD	13.6595	2.97324	1.46876	1	orf19.1279_1104	CDS1 , , orf19.8866 | IPF26045.1 | Contig20105:complement(3198..1933) , CDP-diacylglycerol synthase	CDS1		CDP-diacylglycerol synthase	orf19.8866	IPF26045.1	Contig20105:complement(3198..1933)
orf19.1280_45	17608	0.130189	0.66834	0.432385	0.130189	0.804092	-1.24364	FLT down vs GRD	2.84419	0.653089	0.683389	1	orf19.1280_45	SUI1 , , orf19.8867 | IPF10374.1 | Contig20105:4730..5059 , translation initiation factor eIF3 subunit	SUI1		translation initiation factor eIF3 subunit	orf19.8867	IPF10374.1	Contig20105:4730..5059
orf19.1281_356	1742.25	0.000732107	0.228291	0.0190539	0.000732107	2.01328	2.01328	FLT up vs GRD	28.0453	1.75527	8.5737	1	orf19.1281_356	, , orf19.8868 | IPF26047.1 | Contig20105:5593..6258 , conserved hypothetical protein			conserved hypothetical protein	orf19.8868	IPF26047.1	Contig20105:5593..6258
orf19.1282_43	1556.44	0.282675	0.565301	0.10191	0.282675	0.898828	-1.11256	FLT down vs GRD	1.32655	0.82503	3.41224	1	orf19.1282_43	CKS1 , , orf19.8869 | IPF26050.1 | Contig20105:7219..7527 , cyclin-dependent kinases regulatory subunit	CKS1		cyclin-dependent kinases regulatory subunit	orf19.8869	IPF26050.1	Contig20105:7219..7527
orf19.1283_6895	1302.44	0.599011	0.866715	0.0644451	0.599011	0.904331	-1.10579	FLT down vs GRD	0.299692	0.35307	4.5937	1	orf19.1283_6895	MEC1 , , orf19.8870 | IPF19757.1 | Contig20105:7995..14972 , cell cycle checkpoint protein	MEC1		cell cycle checkpoint protein	orf19.8870	IPF19757.1	Contig20105:7995..14972
orf19.1285_2664	1542	0.223236	0.193044	0.871409	0.223236	0.819303	-1.22055	FLT down vs GRD	1.74336	1.93993	0.027935	1	orf19.1285_2664	, , orf19.8872 | IPF26042.1 | Contig20105:complement(17939..15018) , conserved hypothetical protein			conserved hypothetical protein	orf19.8872	IPF26042.1	Contig20105:complement(17939..15018)
orf19.1286_213	91.8125	0.533439	0.754316	0.857715	0.533439	1.34868	1.34868	FLT up vs GRD	0.423495	0.522017	0.0342825	1	orf19.1286_213	, , orf19.8873 | IPF26049.1 | Contig20105:20267..20656 , hypothetical protein			hypothetical protein	orf19.8873	IPF26049.1	Contig20105:20267..20656
orf19.1287_385	889	0.692947	0.0081897	0.210819	0.692947	1.05976	1.05976	FLT up vs GRD	0.167656	7.08414	1.85045	1	orf19.1287_385	, , orf19.8874 | IPF26046.1 | Contig20105:complement(25573..24431) , hypothetical protein			hypothetical protein	orf19.8874	IPF26046.1	Contig20105:complement(25573..24431)
orf19.1288_3	2956.63	0.0234861	0.124179	0.343178	0.0234861	1.51749	1.51749	FLT up vs GRD	7.79521	2.45548	1.01512	1	orf19.1288_3	FOX22 , , , multifunctional peroxisomal beta-oxidation protein	FOX22		multifunctional peroxisomal beta-oxidation protein
orf19.1289_1511	901.375	0.0994476	0.100836	0.872968	0.0994476	1.19819	1.19819	FLT up vs GRD	3.47134	2.71579	0.027255	1	orf19.1289_1511	SCT1 , , , glycerol-3-phosphate O-acyltransferase	SCT1		glycerol-3-phosphate O-acyltransferase
orf19.1290_571	720.125	0.0471972	0.0401674	0.847201	0.0471972	1.69079	1.69079	FLT up vs GRD	5.48946	4.02453	0.0396151	1	orf19.1290_571	XKS2 , , , xylulokinase	XKS2		xylulokinase
orf19.1291_2086	883.688	0.670733	0.745619	0.891174	0.670733	0.89857	-1.11288	FLT down vs GRD	0.194678	0.535001	0.019948	1	orf19.1291_2086	ABZ1 , , , para-aminobenzoate synthase, (PABA)	ABZ1		para-aminobenzoate synthase, (PABA)
orf19.1294_976	434.375	0.025105	0.328144	0.555884	0.025105	0.516612	-1.93569	FLT down vs GRD	7.55596	1.37295	0.377747	1	orf19.1294_976	, , , coiled coil protein similar to myosin			coiled coil protein similar to myosin
orf19.1295_2991	2801.44	0.475011	0.197718	0.289152	0.475011	0.902554	-1.10797	FLT down vs GRD	0.561763	1.91324	1.2887	1	orf19.1295_2991	VAS1 , , orf19.8875 | IPF26041.1 | Contig20108:complement(3933..688) , valyl-tRNA synthetase	VAS1		valyl-tRNA synthetase	orf19.8875	IPF26041.1	Contig20108:complement(3933..688)
orf19.1296_41	580.438	0.0699828	0.156894	0.566339	0.0699828	0.619071	-1.61532	FLT down vs GRD	4.36945	2.17651	0.35768	1	orf19.1296_41	PRP31 , , orf19.8876 | IPF26039.1 | Contig20108:complement(5036..4368) , pre-mRNA splicing protein	PRP31		pre-mRNA splicing protein	orf19.8876	IPF26039.1	Contig20108:complement(5036..4368)
orf19.1297_718	103.438	0.698375	0.0501999	0.331157	0.698375	1.17076	1.17076	FLT up vs GRD	0.161417	3.68152	1.0702	1	orf19.1297_718	CVT20 , , orf19.8877 | IPF26018.1 | Contig20109:complement(1642..419) , cytoplasm to vacuole targeting	CVT20		cytoplasm to vacuole targeting	orf19.8877	IPF26018.1	Contig20109:complement(1642..419)
orf19.1298_1917	717.75	0.334929	0.00330182	0.89137	0.334929	0.887747	-1.12645	FLT down vs GRD	1.05259	9.44708	0.0198758	1	orf19.1298_1917	NUP84 , , orf19.8878 | IPF26014.1 | Contig20109:2778..4487 , nuclear pore complex subunit	NUP84		nuclear pore complex subunit	orf19.8878	IPF26014.1	Contig20109:2778..4487
orf19.1299_1173	3470.25	0.985423	0.648376	0.313224	0.985423	0.996137	-1.00388	FLT down vs GRD	0.000355315	0.684794	1.15818	1	orf19.1299_1173	RPN6 , , orf19.8879 | IPF13551.2 | Contig20109:complement(6832..5345) , proteasome regulatory particle subunit	RPN6		proteasome regulatory particle subunit	orf19.8879	IPF13551.2	Contig20109:complement(6832..5345)
orf19.13_935	6549.56	0.0233228	0.166637	0.99399	0.0233228	1.79108	1.79108	FLT up vs GRD	7.8205	2.10677	6.04e-05	1	orf19.13_935	GLK3 , , orf19.7686 | IPF27232.1 | Contig20011:7640..9058 , glucokinase, aldohexose specific	GLK3		glucokinase, aldohexose specific	orf19.7686	IPF27232.1	Contig20011:7640..9058
orf19.130_3602	395.5	0.185474	0.605391	0.838301	0.185474	0.765598	-1.30617	FLT down vs GRD	2.09854	0.755462	0.0444438	1	orf19.130_3602	VPS15 , , orf19.7773 | IPF7041.2 | Contig20035:complement(72453..71275) | orf19.7775 | IPF27168.1 | Contig20035:complement(73983..72463) | orf19.7776 | IPF7035.2 | Contig20035:complement(75889..73901) , vacuolar protein sorting protein kinase	VPS15		vacuolar protein sorting protein kinase	orf19.7773	IPF7041.2	Contig20035:complement(72453..71275)
orf19.1300_1198	1960.13	0.799076	0.0293125	0.522936	0.799076	0.976882	-1.02366	FLT down vs GRD	0.0692546	4.54115	0.446221	1	orf19.1300_1198	, , orf19.8880 | IPF13552.2 | Contig20109:6921..8255 , conserved hypothtical protein			conserved hypothtical protein	orf19.8880	IPF13552.2	Contig20109:6921..8255
orf19.1301_427	2083.69	0.266995	0.469361	0.41081	0.266995	0.781759	-1.27917	FLT down vs GRD	1.42359	1.01155	0.75297	1	orf19.1301_427	, , orf19.8881 | IPF13554.1 | Contig20109:complement(8866..8372) , hypothetical protein			hypothetical protein	orf19.8881	IPF13554.1	Contig20109:complement(8866..8372)
orf19.1302_138	69.375	0.793035	0.859934	0.59174	0.793035	0.848281	-1.17886	FLT down vs GRD	0.0735994	0.36362	0.312003	1	orf19.1302_138	, , orf19.8882 | IPF13556.2 | Contig20109:complement(10259..9612) , hypothetical protein			hypothetical protein	orf19.8882	IPF13556.2	Contig20109:complement(10259..9612)
orf19.1303_887	386.938	0.421382	0.954608	0.487675	0.421382	0.722501	-1.38408	FLT down vs GRD	0.718142	0.197701	0.529223	1	orf19.1303_887	MRF1 , , orf19.8883 | IPF19627.2 | Contig20109:11157..12395 , mitochondrial polypeptide chain release factor	MRF1		mitochondrial polypeptide chain release factor	orf19.8883	IPF19627.2	Contig20109:11157..12395
orf19.1304_394	244.375	0.388598	0.203576	0.124879	0.388598	0.714718	-1.39915	FLT down vs GRD	0.831105	1.88082	2.93775	1	orf19.1304_394	RRP4 , , orf19.8884 | IPF6681.3 | Contig20109:complement(13420..12506) , rRNA processing exoribonuclease complex component	RRP4		rRNA processing exoribonuclease complex component	orf19.8884	IPF6681.3	Contig20109:complement(13420..12506)
orf19.1305_1284	648.875	0.405523	0.858116	0.0815146	0.405523	0.802568	-1.246	FLT down vs GRD	0.770943	0.366432	3.96824	1	orf19.1305_1284	TRM5 , , orf19.8885 | IPF26017.1 | Contig20109:13633..14982 , ﾠtRNA (guanine) methyltransferase	TRM5		?tRNA (guanine) methyltransferase	orf19.8885	IPF26017.1	Contig20109:13633..14982
orf19.1306_742	959.688	0.00101111	0.705228	0.51906	0.00101111	0.424812	-2.35398	FLT down vs GRD	25.3253	0.595964	0.454829	1	orf19.1306_742	, , orf19.8886 | IPF26019.1 | Contig20109:15539..16549 , conserved oxidase			conserved oxidase	orf19.8886	IPF26019.1	Contig20109:15539..16549
orf19.1307_1272	394.938	0.136445	0.0149946	0.329047	0.136445	0.764107	-1.30872	FLT down vs GRD	2.74023	5.77953	1.08018	1	orf19.1307_1272	, , orf19.8887 | IPF26015.1 | Contig20109:17058..18560 , conserved hypothetical protein			conserved hypothetical protein	orf19.8887	IPF26015.1	Contig20109:17058..18560
orf19.1308_1394	1015.31	0.231294	0.131492	0.441821	0.231294	0.879587	-1.1369	FLT down vs GRD	1.67818	2.38595	0.654743	1	orf19.1308_1394	, , orf19.8888 | IPF18658.2 | Contig20109:complement(20369..18624) , MFS transporter			MFS transporter	orf19.8888	IPF18658.2	Contig20109:complement(20369..18624)
orf19.1309_209	591.75	0.0559307	0.208696	0.693249	0.0559307	1.48989	1.48989	FLT up vs GRD	4.99158	1.85339	0.167305	1	orf19.1309_209	, , orf19.8889 | IPF6673.1 | Contig20109:21114..21527 , hypothetical protein			hypothetical protein	orf19.8889	IPF6673.1	Contig20109:21114..21527
orf19.131.2	3373.69	0.949811	0.771414	0.494988	0.949811	0.986759	-1.01342	FLT down vs GRD	0.00421794	0.496578	0.511115	1	orf19.131.2	, , orf19.7777.2 | IPF7031.2 | Contig20035:76933..77298 , hypothetical protein			hypothetical protein	orf19.7777.2	IPF7031.2	Contig20035:76933..77298
orf19.131_497	103.688	0.5832	0.582667	0.102163	0.5832	1.26976	1.26976	FLT up vs GRD	0.326888	0.794405	3.40625	1	orf19.131_497	, , orf19.7777 | IPF7033.2 | Contig20035:76092..76766 , hypothetical protein			hypothetical protein	orf19.7777	IPF7033.2	Contig20035:76092..76766
orf19.1310_1266	132.438	0.946331	0.952953	0.673522	0.946331	0.963934	-1.03742	FLT down vs GRD	0.00482414	0.201279	0.191152	1	orf19.1310_1266	, , orf19.8890 | IPF6672.2 | Contig20109:21680..23581 , similar to DNA repair protein Rad4			similar to DNA repair protein Rad4	orf19.8890	IPF6672.2	Contig20109:21680..23581
orf19.1311_2503	73.9375	0.900235	0.137013	0.0551012	0.900235	0.946786	-1.05621	FLT down vs GRD	0.0167443	2.33649	5.03446	1	orf19.1311_2503	SPO75 , , orf19.8891 | IPF6671.2 | Contig20109:complement(26157..23572) , related to yeast sporulation protein	SPO75		related to yeast sporulation protein	orf19.8891	IPF6671.2	Contig20109:complement(26157..23572)
orf19.1313_4043	452.75	0.651012	0.759943	0.537268	0.651012	1.11975	1.11975	FLT up vs GRD	0.220748	0.513635	0.415424	1	orf19.1313_4043	CDR3 , CDR3 , orf19.8893 | IPF26026.1 | Contig20109:31542..36047 , opaque-specific multidrug resistance transporter	CDR3	CDR3	opaque-specific multidrug resistance transporter	orf19.8893	IPF26026.1	Contig20109:31542..36047
orf19.1314_584	343.188	0.954106	0.0566535	0.308853	0.954106	0.984711	-1.01553	FLT down vs GRD	0.00352605	3.50281	1.18077	1	orf19.1314_584	, , orf19.8894 | IPF26016.1 | Contig20109:36995..38404 , conserved hypothetical protein with Zn ring finger			conserved hypothetical protein with Zn ring finger	orf19.8894	IPF26016.1	Contig20109:36995..38404
orf19.1317_2272	531.125	0.123901	0.897863	0.728046	0.123901	0.711699	-1.40509	FLT down vs GRD	2.95555	0.303024	0.12972	1	orf19.1317_2272	OSH3 , , orf19.8897 | IPF26009.1 | Contig20109:39596..42130 , oxysterol binding protein	OSH3		oxysterol binding protein	orf19.8897	IPF26009.1	Contig20109:39596..42130
orf19.1318_592	277.188	0.108131	0.923448	0.924324	0.108131	1.53527	1.53527	FLT up vs GRD	3.27084	0.25886	0.00960886	1	orf19.1318_592	, , orf19.8898 | IPF26020.1 | Contig20109:complement(43335..42262) , hypothetical protein			hypothetical protein	orf19.8898	IPF26020.1	Contig20109:complement(43335..42262)
orf19.132_312	689.188	0.601779	0.776511	0.0496285	0.601779	0.886277	-1.12832	FLT down vs GRD	0.295093	0.489007	5.33971	1	orf19.132_312	SIF2 , , orf19.7778 | IPF7030.3 | Contig20035:complement(79389..77401) , Sir4p-Interacting Factor	SIF2		Sir4p-Interacting Factor	orf19.7778	IPF7030.3	Contig20035:complement(79389..77401)
orf19.1321_0	491.813	0.792751	0.146307	0.284039	0.792751	0.917658	-1.08973	FLT down vs GRD	0.0738072	2.25844	1.31848	1	orf19.1321_0	HWP1 , , orf19.8901 | IPF26012.1 | Contig20109:complement(46143..44239) , hyphal wall protein	HWP1		hyphal wall protein	orf19.8901	IPF26012.1	Contig20109:complement(46143..44239)
orf19.1323_1797	558.688	0.462281	0.948441	0.0752669	0.462281	0.891329	-1.12192	FLT down vs GRD	0.596058	0.21079	4.17579	1	orf19.1323_1797	APL6 , , orf19.8903 | IPF26010.1 | Contig20109:complement(50539..48224) , clathrin assembly complex beta adaptin component	APL6		clathrin assembly complex beta adaptin component	orf19.8903	IPF26010.1	Contig20109:complement(50539..48224)
orf19.1324_2661	739.375	0.00577474	0.0299933	0.0559808	0.00577474	1.49319	1.49319	FLT up vs GRD	13.9246	4.50218	4.98901	1	orf19.1324_2661	RAD2 , , orf19.8904 | IPF26007.1 | Contig20109:complement(53692..50720) , structure-specific nuclease of the nucleotide excision repairosome	RAD2		structure-specific nuclease of the nucleotide excision repairosome	orf19.8904	IPF26007.1	Contig20109:complement(53692..50720)
orf19.1325_1267	210.375	0.241928	0.150914	0.38485	0.241928	0.687723	-1.45407	FLT down vs GRD	1.59685	2.22194	0.844996	1	orf19.1325_1267	ECM37 , , orf19.8905 | IPF26013.1 | Contig20109:54351..56111 , gamma-glutamyltransferase	ECM37		gamma-glutamyltransferase	orf19.8905	IPF26013.1	Contig20109:54351..56111
orf19.1326_861	93.25	0.62307	0.518893	0.45889	0.62307	1.32104	1.32104	FLT up vs GRD	0.261245	0.911169	0.605474	1	orf19.1326_861	, , orf19.8906 | IPF26011.1 | Contig20109:complement(58234..56264) , hypothetical protein			hypothetical protein	orf19.8906	IPF26011.1	Contig20109:complement(58234..56264)
orf19.1327_304	41.75	0.9414	0.416035	0.220221	0.9414	0.95379	-1.04845	FLT down vs GRD	0.00575349	1.13232	1.7686	1	orf19.1327_304	RBT1 , , orf19.8907 | IPF19252.2 | Contig20109:61643..63787 , repressed by Tup1, related to HWP1	RBT1		repressed by Tup1, related to HWP1	orf19.8907	IPF19252.2	Contig20109:61643..63787
orf19.1329_106	158.688	0.350786	0.0471908	0.339343	0.350786	1.39505	1.39505	FLT up vs GRD	0.981749	3.77483	1.03237	1	orf19.1329_106	, , orf19.8909 | IPF26001.1 | Contig20110:complement(494..3) , hypothetical protein			hypothetical protein	orf19.8909	IPF26001.1	Contig20110:complement(494..3)
orf19.133_167	28.25	0.240478	0.182156	0.465381	0.240478	0.435383	-2.29683	FLT down vs GRD	1.60765	2.00521	0.587556	1	orf19.133_167	, , , hypothetical protein			hypothetical protein
orf19.1330_680	41.125	0.0814845	0.841278	0.155414	0.0814845	3.16193	3.16193	FLT up vs GRD	3.96919	0.392214	2.46004	1	orf19.1330_680	, , orf19.8910 | IPF25994.1 | Contig20110:complement(3320..1500) , hypothetical protein			hypothetical protein	orf19.8910	IPF25994.1	Contig20110:complement(3320..1500)
orf19.1331_526	1544.13	3.02e-07	4.31e-05	0.000338847	3.02e-07	2.59943	2.59943	FLT up vs GRD	239.496	32.1415	35.5003	1	orf19.1331_526	HSM3 , , orf19.8911 | IPF8030.1 | Contig20110:5691..7109 , MutS family (putative) | mismatch repair	HSM3		MutS family (putative) | mismatch repair	orf19.8911	IPF8030.1	Contig20110:5691..7109
orf19.1332_1464	303.188	0.602125	0.484005	0.669517	0.602125	0.743848	-1.34436	FLT down vs GRD	0.294521	0.980829	0.196227	1	orf19.1332_1464	SNG4 , , orf19.8912 | IPF25997.1 | Contig20110:complement(8865..7204) , drug transporter	SNG4		drug transporter	orf19.8912	IPF25997.1	Contig20110:complement(8865..7204)
orf19.1333_1674	1021.81	0.102692	0.998915	0.588706	0.102692	1.49014	1.49014	FLT up vs GRD	3.39385	0.0374216	0.317237	1	orf19.1333_1674	SNG3 , , orf19.8913 | IPF25995.1 | Contig20110:9989..11818 , drug transporter	SNG3		drug transporter	orf19.8913	IPF25995.1	Contig20110:9989..11818
orf19.1334_1375	243.438	0.651057	0.00545162	0.636963	0.651057	1.14185	1.14185	FLT up vs GRD	0.220686	8.07756	0.240572	1	orf19.1334_1375	, , orf19.8914 | IPF25991.1 | Contig20110:14397..16361 , hypothetical protein			hypothetical protein	orf19.8914	IPF25991.1	Contig20110:14397..16361
orf19.1335_2937	1448.31	0.0102667	0.572456	0.511382	0.0102667	0.55748	-1.79379	FLT down vs GRD	11.14	0.812315	0.472246	1	orf19.1335_2937	MTR4 , , orf19.8915 | IPF8020.2 | Contig20110:16633..19821 , Dead-box family helicase required for mRNA export from nucleus	MTR4		Dead-box family helicase required for mRNA export from nucleus	orf19.8915	IPF8020.2	Contig20110:16633..19821
orf19.1336.2	1943.44	0.00515564	0.631037	0.308273	0.00515564	1.76737	1.76737	FLT up vs GRD	14.5234	0.712873	1.1838	1	orf19.1336.2	, , orf19.8916.1 | IPF26004.1 | Contig20110:complement(21263..20964) , conserved hypothetical protein			conserved hypothetical protein	orf19.8916.1	IPF26004.1	Contig20110:complement(21263..20964)
orf19.1336_528	4758.06	0.872067	0.0838064	0.212362	0.872067	1.07301	1.07301	FLT up vs GRD	0.0276472	2.95723	1.83668	1	orf19.1336_528	PUP3 , , orf19.8916 | IPF8017.2 | Contig20110:20102..20722 , 20S proteasome subunit beta3	PUP3		20S proteasome subunit beta3	orf19.8916	IPF8017.2	Contig20110:20102..20722
orf19.1338_971	1551.63	0.00988063	0.0231527	0.0169475	0.00988063	0.773793	-1.29234	FLT down vs GRD	11.313	4.9543	9.02878	1	orf19.1338_971	, , orf19.8918 | IPF7930.1 | Contig20110:21990..23084 , conserved hypothetical protein			conserved hypothetical protein	orf19.8918	IPF7930.1	Contig20110:21990..23084
orf19.1339_1272	6005.63	0.106707	0.745026	0.612893	0.106707	0.720834	-1.38728	FLT down vs GRD	3.30225	0.535887	0.277089	1	orf19.1339_1272	CPY1 , CPY1 , orf19.8919 | IPF18540.1 | Contig20110:complement(24733..23342) , serine carboxypeptidase Y precursor	CPY1	CPY1	serine carboxypeptidase Y precursor	orf19.8919	IPF18540.1	Contig20110:complement(24733..23342)
orf19.134_346	49.1875	0.329955	0.859205	0.114149	0.329955	0.702729	-1.42302	FLT down vs GRD	1.07587	0.364749	3.1438	1	orf19.134_346	, , , hypothetical protein			hypothetical protein
orf19.1340_770	1232.81	0.00477344	0.0126379	0.294614	0.00477344	0.578813	-1.72767	FLT down vs GRD	14.94	6.12902	1.25772	1	orf19.1340_770	, , orf19.8920 | IPF18538.2 | Contig20110:25775..26704 , aldose reductase			aldose reductase	orf19.8920	IPF18538.2	Contig20110:25775..26704
orf19.1341_739	51.5625	0.862425	0.690956	0.26256	0.862425	1.05627	1.05627	FLT up vs GRD	0.0320236	0.617867	1.45253	1	orf19.1341_739	PRR2 , , orf19.8921 | IPF25999.1 | Contig20110:26842..27798 , serine/threonine kinase	PRR2		serine/threonine kinase	orf19.8921	IPF25999.1	Contig20110:26842..27798
orf19.1342_187	1089.63	0.822223	0.387757	0.535716	0.822223	1.09033	1.09033	FLT up vs GRD	0.0539105	1.20316	0.418682	1	orf19.1342_187	SHM1 , SHM1 , orf19.8922 | IPF19725.2 | Contig20110:28076..29557 , serine hydroxymethyl- transferase I	SHM1	SHM1	serine hydroxymethyl- transferase I	orf19.8922	IPF19725.2	Contig20110:28076..29557
orf19.1343_2981	719.063	0.0788209	0.885446	0.329495	0.0788209	0.728811	-1.3721	FLT down vs GRD	4.05512	0.323344	1.07805	1	orf19.1343_2981	SIN4 , , orf19.8923 | IPF7922.2 | Contig20110:29830..32991 , RNA polymerase II holoenzyme/mediator subunit	SIN4		RNA polymerase II holoenzyme/mediator subunit	orf19.8923	IPF7922.2	Contig20110:29830..32991
orf19.1344_53	725.188	0.0264645	0.36473	0.417211	0.0264645	0.363727	-2.74932	FLT down vs GRD	7.36964	1.26509	0.731711	1	orf19.1344_53	, , orf19.8924 | IPF26000.1 | Contig20110:complement(33992..33165) , hypothetical protein			hypothetical protein	orf19.8924	IPF26000.1	Contig20110:complement(33992..33165)
orf19.1345_1315	98.25	0.43936	0.0255297	0.213603	0.43936	1.28803	1.28803	FLT up vs GRD	0.662114	4.78029	1.8257	1	orf19.1345_1315	LIP8 , LIP8 , orf19.8925 | IPF7914.2 | Contig20110:36766..38148 , secreted lipase	LIP8	LIP8	secreted lipase	orf19.8925	IPF7914.2	Contig20110:36766..38148
orf19.1346_333	34.875	0.0454837	0.0736559	0.134165	0.0454837	2.54424	2.54424	FLT up vs GRD	5.60103	3.13176	2.77737	1	orf19.1346_333	HYR6 , , orf19.8926 | IPF25998.1 | Contig20110:43416..45119 , hyphally regulated cell wall protein	HYR6		hyphally regulated cell wall protein	orf19.8926	IPF25998.1	Contig20110:43416..45119
orf19.1347_29	79.8125	0.740496	0.337143	0.353015	0.740496	0.884098	-1.1311	FLT down vs GRD	0.117594	1.34522	0.972181	1	orf19.1347_29	, , , peptide transporter			peptide transporter
orf19.1348_260	243.25	0.736021	0.491111	0.209343	0.736021	1.13479	1.13479	FLT up vs GRD	0.121875	0.966253	1.86376	1	orf19.1348_260	, , orf19.8928 | IPF25984.1 | Contig20111:905..1468 , hypothetical protein			hypothetical protein	orf19.8928	IPF25984.1	Contig20111:905..1468
orf19.1349_161	447	0.0145266	0.017979	0.252004	0.0145266	1.75564	1.75564	FLT up vs GRD	9.64908	5.42413	1.52428	1	orf19.1349_161	, , orf19.8929 | IPF25987.1 | Contig20111:2555..2995 , hypothetical protein			hypothetical protein	orf19.8929	IPF25987.1	Contig20111:2555..2995
orf19.135_1908	297.188	0.333063	0.375356	0.716719	0.333063	0.622248	-1.60707	FLT down vs GRD	1.06126	1.236	0.141348	1	orf19.135_1908	EXO84 , , orf19.7779 | IPF18738.2 | Contig20035:79418..81793 , exocyst complex component and pre-mRNA splicing factor	EXO84		exocyst complex component and pre-mRNA splicing factor	orf19.7779	IPF18738.2	Contig20035:79418..81793
orf19.1350_454	1640.5	0.231763	0.0566024	0.0530385	0.231763	0.87482	-1.14309	FLT down vs GRD	1.67449	3.50412	5.14477	1	orf19.1350_454	, , orf19.8930 | IPF19616.2 | Contig20111:complement(4320..3322) , hypothetical protein			hypothetical protein	orf19.8930	IPF19616.2	Contig20111:complement(4320..3322)
orf19.1351_138	583.125	0.72338	0.368113	0.512247	0.72338	0.930295	-1.07493	FLT down vs GRD	0.13444	1.25573	0.470258	1	orf19.1351_138	, , orf19.8931 | IPF19017.1 | Contig20111:6121..6861 , hypothetical protein			hypothetical protein	orf19.8931	IPF19017.1	Contig20111:6121..6861
orf19.1352_376	636	0.11138	0.157387	0.0847401	0.11138	1.36528	1.36528	FLT up vs GRD	3.20113	2.17285	3.86896	1	orf19.1352_376	TIM22 , , orf19.8932 | IPF25985.1 | Contig20111:complement(7547..6993) , mitochondrial inner membrane protein involved in import of proteins of the ADP/ATP carrier (AAC) family	TIM22		mitochondrial inner membrane protein involved in import of proteins of the ADP/ATP carrier (AAC) family	orf19.8932	IPF25985.1	Contig20111:complement(7547..6993)
orf19.1353_258	152.375	0.523279	0.420914	0.00817522	0.523279	0.798751	-1.25195	FLT down vs GRD	0.445464	1.12062	12.1936	1	orf19.1353_258	, , orf19.8933 | IPF25986.1 | Contig20111:8873..9409 , hypothetical protein			hypothetical protein	orf19.8933	IPF25986.1	Contig20111:8873..9409
orf19.1354_406	13949.8	9.74e-05	0.00422703	0.663196	9.74e-05	1.77797	1.77797	FLT up vs GRD	51.069	8.7512	0.204404	1	orf19.1354_406	, , , conserved hypothetical protein			conserved hypothetical protein
orf19.1355_855	1034.63	0.101409	0.0260981	0.317132	0.101409	1.4271	1.4271	FLT up vs GRD	3.42411	4.74164	1.13838	1	orf19.1355_855	SOL1 , , orf19.8935 | IPF25953.1 | Contig20113:174..1217 , 6-phosphogluconolactonase | multicopy supressor of los1-1	SOL1		6-phosphogluconolactonase | multicopy supressor of los1-1	orf19.8935	IPF25953.1	Contig20113:174..1217
orf19.1356_42	778.625	0.366676	0.667014	0.588248	0.366676	0.682908	-1.46433	FLT down vs GRD	0.915503	0.655176	0.318033	1	orf19.1356_42	, , orf19.8936 | IPF17674.1 | Contig20113:complement(2628..2059) , thiosulfate sulfurtransferase			thiosulfate sulfurtransferase	orf19.8936	IPF17674.1	Contig20113:complement(2628..2059)
orf19.1357_941	4027.81	0.081079	0.000627734	0.369229	0.081079	0.878885	-1.13781	FLT down vs GRD	3.98203	15.4134	0.905272	1	orf19.1357_941	FCY2 , , orf19.8937 | IPF17673.3 | Contig20113:complement(4261..3074) | orf19.8937.1 | IPF8921.2 | Contig20113:complement(4618..4334) , purine-cytosine permease	FCY2		purine-cytosine permease	orf19.8937	IPF17673.3	Contig20113:complement(4261..3074)
orf19.1358_148	7848.38	0.000116636	0.0161702	0.588374	0.000116636	1.77519	1.77519	FLT up vs GRD	48.5129	5.62983	0.317815	1	orf19.1358_148	GCN4 , GCN4 , orf19.8938 | IPF25958.1 | Contig20113:complement(8181..7210) , transcriptional activator of the aa starvation response	GCN4	GCN4	transcriptional activator of the aa starvation response	orf19.8938	IPF25958.1	Contig20113:complement(8181..7210)
orf19.1359_1140	629	0.26056	0.516478	0.55619	0.26056	0.624599	-1.60103	FLT down vs GRD	1.4658	0.915843	0.377149	1	orf19.1359_1140	, , orf19.8939 | IPF25938.1 | Contig20113:complement(11188..9617) , hypothetical protein			hypothetical protein	orf19.8939	IPF25938.1	Contig20113:complement(11188..9617)
orf19.136_1952	477.438	0.372739	0.010109	0.238674	0.372739	1.1376	1.1376	FLT up vs GRD	0.891384	6.60791	1.6212	1	orf19.136_1952	AQR2 , , orf19.7780 | IPF16599.3 | Contig20035:complement(84015..81925) , multidrug resistance transporter	AQR2		multidrug resistance transporter	orf19.7780	IPF16599.3	Contig20035:complement(84015..81925)
orf19.1360.1	2293.06	0.000373041	0.140916	0.0171391	0.000373041	0.569767	-1.7551	FLT down vs GRD	34.4893	2.30296	8.9845	1	orf19.1360.1	OST4 , OST4 , orf19.8940.1 | IPF25933.1 | Contig20113:12367..12549 , oligosaccharyltransferase subunit	OST4	OST4	oligosaccharyltransferase subunit	orf19.8940.1	IPF25933.1	Contig20113:12367..12549
orf19.1360_9	138.75	0.437796	0.0251672	0.0332125	0.437796	1.38231	1.38231	FLT up vs GRD	0.666836	4.8055	6.59644	1	orf19.1360_9	, , orf19.8940 | IPF25969.1 | Contig20113:complement(12115..11618) , conserved hypothetical protein			conserved hypothetical protein	orf19.8940	IPF25969.1	Contig20113:complement(12115..11618)
orf19.1361_254	3753.44	0.870619	0.122	0.291596	0.870619	1.02663	1.02663	FLT up vs GRD	0.0282831	2.47716	1.27474	1	orf19.1361_254	TIM23 , , orf19.8941 | IPF25963.1 | Contig20113:13170..13826 ,	TIM23			orf19.8941	IPF25963.1	Contig20113:13170..13826
orf19.1362_1132	1081.06	0.00172166	0.00340586	0.0109428	0.00172166	0.52568	-1.9023	FLT down vs GRD	21.2971	9.35734	10.856	1	orf19.1362_1132	SMM1 , , orf19.8942 | IPF25948.1 | Contig20113:complement(15295..13994) , suppressor of mitochondrial mutation in tRNA(asp) gene	SMM1		suppressor of mitochondrial mutation in tRNA(asp) gene	orf19.8942	IPF25948.1	Contig20113:complement(15295..13994)
orf19.1363_1056	2822.69	0.000145719	0.00516722	0.104208	0.000145719	2.66268	2.66268	FLT up vs GRD	45.5023	8.21593	3.35873	1	orf19.1363_1056	, , orf19.8943 | IPF25951.1 | Contig20113:17881..19059 , conserved hypothetical protein			conserved hypothetical protein	orf19.8943	IPF25951.1	Contig20113:17881..19059
orf19.1364_86	598.813	0.054046	0.069425	0.224857	0.054046	1.67956	1.67956	FLT up vs GRD	5.09022	3.21346	1.72999	1	orf19.1364_86	, , orf19.8944 | IPF25957.1 | Contig20113:complement(20671..19634) , conserved hypothetical protein			conserved hypothetical protein	orf19.8944	IPF25957.1	Contig20113:complement(20671..19634)
orf19.1365_1361	302.125	0.224331	0.016506	0.790232	0.224331	0.751661	-1.33039	FLT down vs GRD	1.73431	5.58954	0.0756643	1	orf19.1365_1361	, , orf19.8945 | IPF25944.1 | Contig20113:21965..23485 , coenzyme F420-dependent N5,N10-methylene tetrahydromethanopterin reductase | flavin-dependent oxidoreductase			coenzyme F420-dependent N5,N10-methylene tetrahydromethanopterin reductase | flavin-dependent oxidoreductase	orf19.8945	IPF25944.1	Contig20113:21965..23485
orf19.1366_912	17.25	0.776272	0.704614	0.335005	0.776272	1.5982	1.5982	FLT up vs GRD	0.0864112	0.596901	1.05224	1	orf19.1366_912	, , orf19.8946 | IPF25949.1 | Contig20113:23896..25155 , flavonol synthase			flavonol synthase	orf19.8946	IPF25949.1	Contig20113:23896..25155
orf19.1367_29	176.938	0.167795	0.68404	0.0947443	0.167795	0.708098	-1.41223	FLT down vs GRD	2.30063	0.628567	3.58972	1	orf19.1367_29	MTW1 , , orf19.8947 | IPF25955.1 | Contig20113:complement(26289..25267) , spindle body component | may determine metaphase spindle length	MTW1		spindle body component | may determine metaphase spindle length	orf19.8947	IPF25955.1	Contig20113:complement(26289..25267)
orf19.1368_1743	2229.06	0.179625	0.0178656	0.877388	0.179625	0.846967	-1.18068	FLT down vs GRD	2.16242	5.43625	0.0253734	1	orf19.1368_1743	, , orf19.8948 | IPF25936.1 | Contig20113:complement(30084..28267) , hypothetical outer membrane lipoprotein			hypothetical outer membrane lipoprotein	orf19.8948	IPF25936.1	Contig20113:complement(30084..28267)
orf19.1369_1105	838.875	0.00385787	0.0214594	0.0111488	0.00385787	1.44922	1.44922	FLT up vs GRD	16.1354	5.09238	10.7737	1	orf19.1369_1105	, , orf19.8949 | IPF8976.2 | Contig20113:35006..36310 , beta alanine synthase			beta alanine synthase	orf19.8949	IPF8976.2	Contig20113:35006..36310
orf19.137_633	760.813	0.0333502	0.00780933	0.0848964	0.0333502	1.42332	1.42332	FLT up vs GRD	6.58279	7.19516	3.86428	1	orf19.137_633	, , orf19.7781 | IPF16598.2 | Contig20035:85592..86833 , acetyltransferase			acetyltransferase	orf19.7781	IPF16598.2	Contig20035:85592..86833
orf19.1370_287	42.0625	0.128882	0.669979	0.299746	0.128882	10.9201	10.9201	FLT up vs GRD	2.86675	0.650512	1.22937	1	orf19.1370_287	, , orf19.8950 | IPF18486.2 | Contig20113:37308..38171 , hypothetical protein			hypothetical protein	orf19.8950	IPF18486.2	Contig20113:37308..38171
orf19.1371_1364	427.625	0.365247	0.510597	0.339622	0.365247	1.60085	1.60085	FLT up vs GRD	0.921276	0.927315	1.03111	1	orf19.1371_1364	, , orf19.8951 | IPF25945.1 | Contig20113:complement(39990..38467) , hypothetical protein			hypothetical protein	orf19.8951	IPF25945.1	Contig20113:complement(39990..38467)
orf19.1372_605	5223	5.23e-05	0.129694	0.970012	5.23e-05	0.528268	-1.89298	FLT down vs GRD	60.8641	2.4026	0.00150426	1	orf19.1372_605	, , , conserved hypothetical protein			conserved hypothetical protein
orf19.1373_2872	266.5	0.00088771	0.000206279	0.275112	0.00088771	0.519043	-1.92662	FLT down vs GRD	26.3953	21.04	1.37236	1	orf19.1373_2872	INP51 , , orf19.8953 | IPF9874.2 | Contig20113:41568..44468 , phosphatidylinositol phosphate 5-phosphatase	INP51		phosphatidylinositol phosphate 5-phosphatase	orf19.8953	IPF9874.2	Contig20113:41568..44468
orf19.1374_341	785.188	0.652891	0.0349786	0.982868	0.652891	0.944506	-1.05876	FLT down vs GRD	0.218176	4.24659	0.00049079	1	orf19.1374_341	, , orf19.8954 | IPF25965.1 | Contig20113:complement(45051..44479) , hypothetical protein			hypothetical protein	orf19.8954	IPF25965.1	Contig20113:complement(45051..44479)
orf19.1375_913	5334.06	0.0342025	0.140111	0.237547	0.0342025	1.63117	1.63117	FLT up vs GRD	6.49983	2.30978	1.62974	1	orf19.1375_913	LEU6 , , orf19.8955 | IPF25939.1 | Contig20113:complement(47236..45515) , alpha-isopropylmalate synthase	LEU6		alpha-isopropylmalate synthase	orf19.8955	IPF25939.1	Contig20113:complement(47236..45515)
orf19.1376_504	1056.63	0.919129	0.154942	0.275579	0.919129	1.03199	1.03199	FLT up vs GRD	0.0109791	2.1911	1.36948	1	orf19.1376_504	SSO2 , , orf19.8956 | IPF25959.1 | Contig20113:complement(49541..48654) , syntaxin | post-Golgi t-SNARE	SSO2		syntaxin | post-Golgi t-SNARE	orf19.8956	IPF25959.1	Contig20113:complement(49541..48654)
orf19.1377_896	948.375	0.772234	0.716147	0.134551	0.772234	0.879071	-1.13756	FLT down vs GRD	0.089666	0.57935	2.77103	1	orf19.1377_896	ARG82 , , orf19.8957 | IPF25956.1 | Contig20113:50465..51517 , dual specificity inositol 1,4,5-trisphosphate 6- kinase | regulator of arginine-responsive genes	ARG82		dual specificity inositol 1,4,5-trisphosphate 6- kinase | regulator of arginine-responsive genes	orf19.8957	IPF25956.1	Contig20113:50465..51517
orf19.1378_2020	4803.63	0.00329273	0.108705	0.0106419	0.00329273	0.679892	-1.47082	FLT down vs GRD	17.0673	2.62049	10.9796	1	orf19.1378_2020	ERF3 , ERF3 , orf19.8958 | IPF25930.1 | Contig20113:complement(53753..51588) , translation release factor 3	ERF3	ERF3	translation release factor 3	orf19.8958	IPF25930.1	Contig20113:complement(53753..51588)
orf19.138_435	30.1875	0.253349	0.315745	0.676218	0.253349	0.270242	-3.70038	FLT down vs GRD	1.51491	1.41258	0.18778	1	orf19.138_435	FIG1 , , orf19.7782 | IPF27175.1 | Contig20035:87150..87947 , integral membrane protein required for efficient mating	FIG1		integral membrane protein required for efficient mating	orf19.7782	IPF27175.1	Contig20035:87150..87947
orf19.1381_1033	472.625	0.625625	0.0304619	0.179219	0.625625	0.848764	-1.17818	FLT down vs GRD	0.257361	4.47598	2.16696	1	orf19.1381_1033	LSB5 , , orf19.8961 | IPF25947.1 | Contig20113:54349..55743 , possible role in the regulation of actin cytoskeletal organization	LSB5		possible role in the regulation of actin cytoskeletal organization	orf19.8961	IPF25947.1	Contig20113:54349..55743
orf19.1382_811	475.75	0.253561	0.144913	0.565866	0.253561	0.713939	-1.40068	FLT down vs GRD	1.51344	2.26976	0.358571	1	orf19.1382_811	YEA4 , , orf19.8962 | IPF14544.2 | Contig20113:complement(56756..55776) , golgi uridine diphosphate-N- acetylglucosamine transporter	YEA4		golgi uridine diphosphate-N- acetylglucosamine transporter	orf19.8962	IPF14544.2	Contig20113:complement(56756..55776)
orf19.1383_487	197.438	0.633586	0.480344	0.355212	0.633586	0.815481	-1.22627	FLT down vs GRD	0.245496	0.988421	0.962839	1	orf19.1383_487	, , , hypothetical protein			hypothetical protein
orf19.1384_1102	249.875	0.131994	0.880823	0.262439	0.131994	0.512224	-1.95227	FLT down vs GRD	2.81353	0.330772	1.45333	1	orf19.1384_1102	, , orf19.8963 | IPF14542.1 | Contig20113:57103..59046 , hypothetical protein			hypothetical protein	orf19.8963	IPF14542.1	Contig20113:57103..59046
orf19.1386_357	2668.94	0.490067	0.813227	0.0825534	0.490067	0.888385	-1.12564	FLT down vs GRD	0.523247	0.43441	3.93572	1	orf19.1386_357	BET1 , , orf19.8964 | IPF25970.1 | Contig20113:complement(59666..59214) , type II membrane protein required for vesicular transport between the endoplasmic reticulum and Golgi complex | v-SNARE with similarity to synaptobrevins	BET1		type II membrane protein required for vesicular transport between the endoplasmic reticulum and Golgi complex | v-SNARE with similarity to synaptobrevins	orf19.8964	IPF25970.1	Contig20113:complement(59666..59214)
orf19.1387_619	3339.75	0.116679	0.679783	0.490018	0.116679	1.30446	1.30446	FLT up vs GRD	3.09299	0.635182	0.523367	1	orf19.1387_619	DRE3 , , orf19.8965 | IPF25954.1 | Contig20113:59875..60966 , nucleotide-binding protein	DRE3		nucleotide-binding protein	orf19.8965	IPF25954.1	Contig20113:59875..60966
orf19.1388_71	1563	0.00965298	0.0639808	0.278796	0.00965298	0.604923	-1.6531	FLT down vs GRD	11.419	3.32807	1.34982	1	orf19.1388_71	NOP16 , , orf19.8966 | IPF25964.1 | Contig20113:complement(61685..61029) , nucleolar protein involved in ribosome biogenesis	NOP16		nucleolar protein involved in ribosome biogenesis	orf19.8966	IPF25964.1	Contig20113:complement(61685..61029)
orf19.1389_413	6658.44	0.748693	0.133174	0.18177	0.748693	0.957629	-1.04425	FLT down vs GRD	0.109975	2.37062	2.13867	1	orf19.1389_413	SGN1 , , orf19.8967 | IPF18804.2 | Contig20113:complement(64727..64236) , poly(A) RNA binding protein	SGN1		poly(A) RNA binding protein	orf19.8967	IPF18804.2	Contig20113:complement(64727..64236)
orf19.139_4309	97.625	0.320952	0.462141	0.388614	0.320952	0.587068	-1.70338	FLT down vs GRD	1.11937	1.02705	0.831045	1	orf19.139_4309	TRA1 , , orf19.7783 | IPF27181.1 | Contig20035:88473..92966 , histone acetyltransferase, component of the NuA4 transcriptional regulatory complex	TRA1		histone acetyltransferase, component of the NuA4 transcriptional regulatory complex	orf19.7783	IPF27181.1	Contig20035:88473..92966
orf19.1390_1043	1405.69	0.00430926	0.0894144	0.563717	0.00430926	0.466975	-2.14144	FLT down vs GRD	15.5062	2.87156	0.362641	1	orf19.1390_1043	PMI1 , PMI1 , orf19.8968 | IPF19894.1 | Contig20113:complement(66934..65609) , mannose-6-phosphate isomerase	PMI1	PMI1	mannose-6-phosphate isomerase	orf19.8968	IPF19894.1	Contig20113:complement(66934..65609)
orf19.1391_348	747.125	0.968377	0.586348	0.630727	0.968377	1.00715	1.00715	FLT up vs GRD	0.00167291	0.788013	0.249717	1	orf19.1391_348	, , orf19.8969 | IPF25966.1 | Contig20113:67665..68174 , dynactin subunit P25			dynactin subunit P25	orf19.8969	IPF25966.1	Contig20113:67665..68174
orf19.1392_1865	1281.06	0.406495	0.0265358	0.24828	0.406495	1.1388	1.1388	FLT up vs GRD	0.767609	4.71259	1.55062	1	orf19.1392_1865	EPS1 , , orf19.8970 | IPF25932.1 | Contig20113:complement(70317..68161) , protein disulfide isomerase	EPS1		protein disulfide isomerase	orf19.8970	IPF25932.1	Contig20113:complement(70317..68161)
orf19.1393_858	914.813	0.723158	0.616523	0.124413	0.723158	0.9209	-1.08589	FLT down vs GRD	0.134668	0.73681	2.94621	1	orf19.1393_858	FLX2 , , orf19.8971 | IPF11065.2 | Contig20113:complement(71819..70719) , mitochondrial carrier protein	FLX2		mitochondrial carrier protein	orf19.8971	IPF11065.2	Contig20113:complement(71819..70719)
orf19.1394_269	1399.94	0.588787	0.12393	0.871006	0.588787	1.08806	1.08806	FLT up vs GRD	0.317097	2.45793	0.0281124	1	orf19.1394_269	, , orf19.8972 | IPF11063.2 | Contig20113:72900..73400 , conserved hypothetical protein			conserved hypothetical protein	orf19.8972	IPF11063.2	Contig20113:72900..73400
orf19.1395_728	2137.19	0.024424	0.0368349	0.0158594	0.024424	0.587439	-1.7023	FLT down vs GRD	7.65415	4.16273	9.29278	1	orf19.1395_728	, , orf19.8973 | IPF11059.2 | Contig20113:76362..77249 , mitochondrial phosphate carrier protein			mitochondrial phosphate carrier protein	orf19.8973	IPF11059.2	Contig20113:76362..77249
orf19.1396_2	505	0.910384	0.963157	0.0536395	0.910384	0.914718	-1.09323	FLT down vs GRD	0.0134945	0.178324	5.11207	1	orf19.1396_2	AGE2 , , orf19.8974 | IPF25950.1 | Contig20113:complement(78626..77463) , zinc finger protein | putative GTPase actiovating protein	AGE2		zinc finger protein | putative GTPase actiovating protein	orf19.8974	IPF25950.1	Contig20113:complement(78626..77463)
orf19.1397_530	992.563	0.855668	0.969161	0.742341	0.855668	0.962446	-1.03902	FLT down vs GRD	0.0352894	0.163579	0.115853	1	orf19.1397_530	CYB4 , , orf19.8975 | IPF25962.1 | Contig20113:80766..81476 , cytochrome b5	CYB4		cytochrome b5	orf19.8975	IPF25962.1	Contig20113:80766..81476
orf19.14_275	8971	0.100495	0.838381	0.986102	0.100495	1.32528	1.32528	FLT up vs GRD	3.44597	0.396609	0.000322951	1	orf19.14_275	, , , conserved hypothetical protein			conserved hypothetical protein
orf19.140_26	99.25	0.874891	0.0483375	0.0708326	0.874891	1.03845	1.03845	FLT up vs GRD	0.026428	3.73842	4.33706	1	orf19.140_26	, , , hypothetical protein			hypothetical protein
orf19.1400_1840	601.25	0.103428	0.0319366	0.413381	0.103428	0.60948	-1.64074	FLT down vs GRD	3.37671	4.39669	0.744365	1	orf19.1400_1840	COPS2 , , orf19.8978 | IPF25931.1 | Contig20113:82272..84515 , nuclear receptor interactor | COP9 (Constitutive photomorphogenic) homolog	COPS2		nuclear receptor interactor | COP9 (Constitutive photomorphogenic) homolog	orf19.8978	IPF25931.1	Contig20113:82272..84515
orf19.1401_1799	1189.19	0.45753	0.258371	0.0475326	0.45753	0.854555	-1.1702	FLT down vs GRD	0.609283	1.62242	5.46822	1	orf19.1401_1799	, , orf19.8979 | IPF7676.3 | Contig20113:complement(89503..86138) , putative regulatory protein			putative regulatory protein	orf19.8979	IPF7676.3	Contig20113:complement(89503..86138)
orf19.1402_1424	2759.75	0.476261	0.628821	0.361451	0.476261	0.738723	-1.35369	FLT down vs GRD	0.558482	0.7165	0.936791	1	orf19.1402_1424	CCT2 , , orf19.8980 | IPF25943.1 | Contig20113:92954..94534 , cytoplasmic chaperonin of the Cct ring complex	CCT2		cytoplasmic chaperonin of the Cct ring complex	orf19.8980	IPF25943.1	Contig20113:92954..94534
orf19.1403_976	845.938	0.576277	0.742304	0.20853	0.576277	0.872366	-1.14631	FLT down vs GRD	0.339303	0.53996	1.87115	1	orf19.1403_976	CMC1 , , orf19.8981 | IPF25937.1 | Contig20113:95421..97139 , calcium-binding mitochondrial carrier	CMC1		calcium-binding mitochondrial carrier	orf19.8981	IPF25937.1	Contig20113:95421..97139
orf19.1404_1190	527.75	0.315924	0.023748	0.0522541	0.315924	0.830952	-1.20344	FLT down vs GRD	1.14446	4.9087	5.18817	1	orf19.1404_1190	DUS1 , , orf19.8982 | IPF25946.1 | Contig20113:complement(98583..97303) , tRNA dihydrouridine synthase	DUS1		tRNA dihydrouridine synthase	orf19.8982	IPF25946.1	Contig20113:complement(98583..97303)
orf19.1405_535	279.688	0.188437	0.811415	0.219495	0.188437	1.59894	1.59894	FLT up vs GRD	2.06722	0.437115	1.77475	1	orf19.1405_535	PHO13 , , orf19.8983 | IPF25952.1 | Contig20113:complement(99863..98898) , p-nitrophenyl phosphatase | 4- nitrophenylphosphatase	PHO13		p-nitrophenyl phosphatase | 4- nitrophenylphosphatase	orf19.8983	IPF25952.1	Contig20113:complement(99863..98898)
orf19.1406_650	1015.5	0.109077	0.572119	0.336006	0.109077	1.38138	1.38138	FLT up vs GRD	3.25026	0.812911	1.04762	1	orf19.1406_650	, , orf19.8984 | IPF25961.1 | Contig20113:complement(101148..100378) , hypothetical protein			hypothetical protein	orf19.8984	IPF25961.1	Contig20113:complement(101148..100378)
orf19.1407_952	5662.19	0.0358158	0.161349	0.167066	0.0358158	2.1936	2.1936	FLT up vs GRD	6.34977	2.14399	2.30957	1	orf19.1407_952	, , , conserved hypothetical membrane protein			conserved hypothetical membrane protein
orf19.1408_937	6776.06	0.0129256	0.253831	0.904041	0.0129256	1.49983	1.49983	FLT up vs GRD	10.1358	1.64128	0.015484	1	orf19.1408_937	GLK2 , , , glucokinase	GLK2		glucokinase
orf19.1409_2041	963.875	0.00443667	0.97846	0.487601	0.00443667	0.630324	-1.58649	FLT down vs GRD	15.3434	0.137975	0.529409	1	orf19.1409_2041	VAC7 , , orf19.8985 | IPF25899.1 | Contig20115:9258..11597 , vacuolar membrane protein	VAC7		vacuolar membrane protein	orf19.8985	IPF25899.1	Contig20115:9258..11597
orf19.141_603	166.313	0.42237	0.803281	0.843274	0.42237	0.708206	-1.41202	FLT down vs GRD	0.714958	0.449235	0.0417096	1	orf19.141_603	, , , hypothetical protein			hypothetical protein
orf19.1411_1716	292.688	0.457888	0.160281	0.396421	0.457888	0.88778	-1.12641	FLT down vs GRD	0.608279	2.15169	0.802784	1	orf19.1411_1716	CYP501A1 , , orf19.8987 | IPF25905.1 | Contig20115:complement(13623..11773) , Cytochrome P450	CYP501A1		Cytochrome P450	orf19.8987	IPF25905.1	Contig20115:complement(13623..11773)
orf19.1412_544	709.063	0.769436	0.233647	0.933625	0.769436	0.945789	-1.05732	FLT down vs GRD	0.0919603	1.73016	0.00738582	1	orf19.1412_544	, , orf19.8988 | IPF25915.1 | Contig20115:complement(14506..13874) , hypothetical protein			hypothetical protein	orf19.8988	IPF25915.1	Contig20115:complement(14506..13874)
orf19.1413_392	1171.13	0.0271752	0.822057	0.617466	0.0271752	1.87407	1.87407	FLT up vs GRD	7.27701	0.421201	0.269895	1	orf19.1413_392	YFH1 , , orf19.8989 | IPF25917.1 | Contig20115:14738..15271 , regulator of mitochondrial iron accumulation	YFH1		regulator of mitochondrial iron accumulation	orf19.8989	IPF25917.1	Contig20115:14738..15271
orf19.1414_457	1461.19	0.516649	0.547992	0.532875	0.516649	1.26181	1.26181	FLT up vs GRD	0.460246	0.856381	0.424693	1	orf19.1414_457	, , orf19.8990 | IPF25914.1 | Contig20115:15994..16770 , hypothetical protein			hypothetical protein	orf19.8990	IPF25914.1	Contig20115:15994..16770
orf19.1415_743	889.563	0.049044	0.22988	0.0782364	0.049044	0.555364	-1.80062	FLT down vs GRD	5.37484	1.74775	4.07447	1	orf19.1415_743	FRE10 , , orf19.8991 | IPF25902.1 | Contig20115:complement(19561..17441) , ferric reductase	FRE10		ferric reductase	orf19.8991	IPF25902.1	Contig20115:complement(19561..17441)
orf19.1416_0	1883.5	0.00141895	0.448062	0.0499002	0.00141895	2.17066	2.17066	FLT up vs GRD	22.6985	1.058	5.32356	1	orf19.1416_0	COX11 , , orf19.8992 | IPF25913.1 | Contig20115:complement(23765..23064) , cytochrome-c oxidase assembly protein	COX11		cytochrome-c oxidase assembly protein	orf19.8992	IPF25913.1	Contig20115:complement(23765..23064)
orf19.1417_75	1186.25	0.133434	0.82018	0.0266241	0.133434	1.54752	1.54752	FLT up vs GRD	2.78946	0.424013	7.34857	1	orf19.1417_75	, , orf19.8993 | IPF25924.1 | Contig20115:24121..24456 , hypothetical protein			hypothetical protein	orf19.8993	IPF25924.1	Contig20115:24121..24456
orf19.1418_807	932.313	0.152599	0.0583461	0.211366	0.152599	0.731208	-1.3676	FLT down vs GRD	2.49866	3.46006	1.84555	1	orf19.1418_807	SEC15 , , orf19.8994 | IPF25910.1 | Contig20115:complement(25523..24522) , exocyst complex component	SEC15		exocyst complex component	orf19.8994	IPF25910.1	Contig20115:complement(25523..24522)
orf19.1420_196	126.5	0.0904176	0.206134	0.16558	0.0904176	0.594844	-1.68111	FLT down vs GRD	3.70557	1.86702	2.32797	1	orf19.1420_196	, , orf19.8996 | IPF25912.1 | Contig20115:27375..28202 , conserved hypothetical protein			conserved hypothetical protein	orf19.8996	IPF25912.1	Contig20115:27375..28202
orf19.1421_358	677.25	0.113046	0.0705076	0.727613	0.113046	0.517016	-1.93418	FLT down vs GRD	3.16643	3.19198	0.130154	1	orf19.1421_358	DAL3 , , orf19.8997 | IPF25916.1 | Contig20115:complement(28871..28230) , ureidoglycolate hydrolase	DAL3		ureidoglycolate hydrolase	orf19.8997	IPF25916.1	Contig20115:complement(28871..28230)
orf19.1422_2428	3350.5	0.00418033	0.192565	0.0590233	0.00418033	1.61792	1.61792	FLT up vs GRD	15.6771	1.94271	4.8386	1	orf19.1422_2428	FZO1 , , orf19.8998 | IPF25897.1 | Contig20115:29283..31907 , GTPase required for biogenesis of mitochondria	FZO1		GTPase required for biogenesis of mitochondria	orf19.8998	IPF25897.1	Contig20115:29283..31907
orf19.1424_1233	441.125	0.0312438	0.0341633	0.0250107	0.0312438	0.668206	-1.49654	FLT down vs GRD	6.79988	4.28519	7.56936	1	orf19.1424_1233	, , orf19.9000 | IPF25904.1 | Contig20115:complement(33760..32045) , conerved hypothetical protein			conerved hypothetical protein	orf19.9000	IPF25904.1	Contig20115:complement(33760..32045)
orf19.1426_1594	822.688	0.356141	0.386946	0.2411	0.356141	1.14726	1.14726	FLT up vs GRD	0.958915	1.20527	1.603	1	orf19.1426_1594	, , orf19.9002 | IPF25901.1 | Contig20115:35582..37711 , conserved hypothetical protein			conserved hypothetical protein	orf19.9002	IPF25901.1	Contig20115:35582..37711
orf19.1427_1347	521.188	0.000403949	0.0169627	0.0204017	0.000403949	0.42781	-2.33748	FLT down vs GRD	33.6705	5.53635	8.31456	1	orf19.1427_1347	, , orf19.9003 | IPF25909.1 | Contig20115:complement(39533..38037) , conserved hypothetical transporter			conserved hypothetical transporter	orf19.9003	IPF25909.1	Contig20115:complement(39533..38037)
orf19.1428_209	94	0.26073	0.146313	0.593277	0.26073	0.633722	-1.57798	FLT down vs GRD	1.46467	2.2584	0.309373	1	orf19.1428_209	, , orf19.9004 | IPF25920.1 | Contig20115:complement(40486..39971) , hypothetical protein			hypothetical protein	orf19.9004	IPF25920.1	Contig20115:complement(40486..39971)
orf19.1429_189	339.25	0.407144	0.980412	0.726631	0.407144	0.768889	-1.30058	FLT down vs GRD	0.765393	0.131995	0.131141	1	orf19.1429_189	SOH1 , , orf19.9005 | IPF25919.1 | Contig20115:40895..41335 , protein with presumed role in DNA repair or recombination	SOH1		protein with presumed role in DNA repair or recombination	orf19.9005	IPF25919.1	Contig20115:40895..41335
orf19.1430_79	128.063	0.766748	0.427601	0.082828	0.766748	0.788717	-1.26788	FLT down vs GRD	0.0941943	1.10481	3.92721	1	orf19.1430_79	, , orf19.9006 | IPF25911.1 | Contig20115:42961..43794 , hypothetical protein			hypothetical protein	orf19.9006	IPF25911.1	Contig20115:42961..43794
orf19.1431_35	101.188	0.270204	0.754811	0.540758	0.270204	1.73448	1.73448	FLT up vs GRD	1.40308	0.521279	0.408165	1	orf19.1431_35	DAL10 , , , allantoate permease	DAL10		allantoate permease
orf19.1433_813	1690	0.174166	0.0520807	0.159796	0.174166	1.32527	1.32527	FLT up vs GRD	2.22463	3.62663	2.40173	1	orf19.1433_813	, , orf19.9007 | IPF25891.1 | Contig20117:complement(1528..335) , predicted acetyltransferases and hydrolases with the alpha/beta hydrolase fold			predicted acetyltransferases and hydrolases with the alpha/beta hydrolase fold	orf19.9007	IPF25891.1	Contig20117:complement(1528..335)
orf19.1434_2071	345.25	0.0779931	0.448008	0.149385	0.0779931	0.687318	-1.45493	FLT down vs GRD	4.08259	1.05812	2.54393	1	orf19.1434_2071	DPB11 , , orf19.9008 | IPF9733.2 | Contig20117:2481..4694 , DNA polymerase II complex component	DPB11		DNA polymerase II complex component	orf19.9008	IPF9733.2	Contig20117:2481..4694
orf19.1435_74	11971.2	0.148428	0.653484	0.73603	0.148428	1.45803	1.45803	FLT up vs GRD	2.55767	0.676622	0.121866	1	orf19.1435_74	TEF2 , TEF2 , orf19.9009 | IPF9732.2 | Contig20117:5058..6434 , translational elongation factor EF- 1 alpha	TEF2	TEF2	translational elongation factor EF- 1 alpha	orf19.9009	IPF9732.2	Contig20117:5058..6434
orf19.1437_800	403.063	0.13115	0.0418068	0.433205	0.13115	0.669824	-1.49293	FLT down vs GRD	2.8278	3.96165	0.680858	1	orf19.1437_800	, , , conserved hypothetical protein			conserved hypothetical protein
orf19.1438_1113	28.75	0.279313	0.354401	0.36506	0.279313	3.68409	3.68409	FLT up vs GRD	1.3467	1.29428	0.922036	1	orf19.1438_1113	, , orf19.9012 | IPF19419.2 | Contig20118:1696..2919 , conserved hypothetical protein			conserved hypothetical protein	orf19.9012	IPF19419.2	Contig20118:1696..2919
orf19.1439_480	1094.81	0.593987	0.0639038	0.706829	0.593987	1.06414	1.06414	FLT up vs GRD	0.308164	3.32977	0.151975	1	orf19.1439_480	IPK1 , , orf19.9013 | IPF25886.1 | Contig20118:complement(4267..3182) , inositol polyphosphate kinase	IPK1		inositol polyphosphate kinase	orf19.9013	IPF25886.1	Contig20118:complement(4267..3182)
orf19.144_2848	772.375	0.253072	0.66085	0.118447	0.253072	0.711293	-1.40589	FLT down vs GRD	1.51683	0.66491	3.05834	1	orf19.144_2848	SNU114 , , orf19.7784 | IPF16740.2 | Contig20037:complement(6071..3003) , ATP dependent RNA helicase and U5 mRNA splicing factor	SNU114		ATP dependent RNA helicase and U5 mRNA splicing factor	orf19.7784	IPF16740.2	Contig20037:complement(6071..3003)
orf19.1440_169	350.813	0.441074	0.883919	0.334695	0.441074	0.740745	-1.34999	FLT down vs GRD	0.656972	0.325805	1.05368	1	orf19.1440_169	, , orf19.9014 | IPF25887.1 | Contig20118:complement(5824..5141) , hypothetical protein			hypothetical protein	orf19.9014	IPF25887.1	Contig20118:complement(5824..5141)
orf19.1441_1657	1091.31	0.889662	0.0995272	0.00968202	0.889662	0.976428	-1.02414	FLT down vs GRD	0.0205104	2.73252	11.4053	1	orf19.1441_1657	, , orf19.9016 | IPF25761.1 | Contig20119:complement(2131..275) , hypothetical protein			hypothetical protein	orf19.9016	IPF25761.1	Contig20119:complement(2131..275)
orf19.1442_1550	937.375	0.584141	0.0776859	0.211657	0.584141	1.11489	1.11489	FLT up vs GRD	0.325226	3.05913	1.84296	1	orf19.1442_1550	PLB4 , , orf19.9017 | IPF15731.2 | Contig20119:4172..5356 | orf19.9018 | IPF15733.2 | Contig20119:5367..6281 , phospholipase B (lysophospholipase)	PLB4		phospholipase B (lysophospholipase)	orf19.9017	IPF15731.2	Contig20119:4172..5356
orf19.1444_1234	1174.56	0.055645	0.0332112	0.138815	0.055645	0.781294	-1.27993	FLT down vs GRD	5.00625	4.33173	2.70247	1	orf19.1444_1234	ENT2 , , orf19.9019 | IPF17555.3 | Contig20119:7062..8624 , epsin N-terminal homology-containing protein | clathrin binding protein, required for endocytosis	ENT2		epsin N-terminal homology-containing protein | clathrin binding protein, required for endocytosis	orf19.9019	IPF17555.3	Contig20119:7062..8624
orf19.1445_1821	271.25	0.0330363	0.0894584	0.315714	0.0330363	1.9658	1.9658	FLT up vs GRD	6.61402	2.87091	1.14552	1	orf19.1445_1821	ESC4 , , orf19.9020 | IPF25740.1 | Contig20119:complement(11681..8853) , regulator of Ty1 Transposition | Establishes Silent Chromatin	ESC4		regulator of Ty1 Transposition | Establishes Silent Chromatin	orf19.9020	IPF25740.1	Contig20119:complement(11681..8853)
orf19.1446_1363	836.625	0.303165	0.00258318	0.0265416	0.303165	1.13692	1.13692	FLT up vs GRD	1.21087	10.182	7.35944	1	orf19.1446_1363	CLB2 , CLB2 , orf19.9021 | IPF25776.1 | Contig20119:complement(13541..12063) , G2/mitotic-specific cyclin | B-type cyclin	CLB2	CLB2	G2/mitotic-specific cyclin | B-type cyclin	orf19.9021	IPF25776.1	Contig20119:complement(13541..12063)
orf19.1447_671	72.375	0.91652	0.236572	0.251058	0.91652	1.13852	1.13852	FLT up vs GRD	0.0117019	1.71674	1.53092	1	orf19.1447_671	, , orf19.9022 | IPF25767.1 | Contig20119:complement(19229..17613) ,				orf19.9022	IPF25767.1	Contig20119:complement(19229..17613)
orf19.1448_321	1503.25	0.00830524	0.0375938	0.341935	0.00830524	0.680737	-1.469	FLT down vs GRD	12.1186	4.12993	1.02068	1	orf19.1448_321	APT1 , , orf19.9023 | IPF25817.1 | Contig20119:19796..20332 , adenine phosphoribosyltransferase	APT1		adenine phosphoribosyltransferase	orf19.9023	IPF25817.1	Contig20119:19796..20332
orf19.1449_453	70.6875	0.58568	0.0495653	0.0610586	0.58568	0.817022	-1.22396	FLT down vs GRD	0.322517	3.70061	4.7434	1	orf19.1449_453	, , orf19.9024 | IPF25807.1 | Contig20119:complement(21800..21111) , cyanamide hydratase (by homology)			cyanamide hydratase (by homology)	orf19.9024	IPF25807.1	Contig20119:complement(21800..21111)
orf19.145_283	769.688	0.947266	0.392258	0.449325	0.947266	0.984667	-1.01557	FLT down vs GRD	0.00465729	1.19152	0.632688	1	orf19.145_283	RPB4 , , orf19.7786 | IPF27151.1 | Contig20037:complement(7378..6893) | orf19.7785 | IPF27153.1 | Contig20037:complement(6921..6565) , RNA polymerase II fourth largest subunit	RPB4		RNA polymerase II fourth largest subunit	orf19.7786	IPF27151.1	Contig20037:complement(7378..6893)
orf19.1450_921	110.625	0.720642	0.381103	0.514695	0.720642	1.25424	1.25424	FLT up vs GRD	0.137255	1.22063	0.464671	1	orf19.1450_921	, , orf19.9025 | IPF25791.1 | Contig20119:complement(23206..22082) , hypothetical protein			hypothetical protein	orf19.9025	IPF25791.1	Contig20119:complement(23206..22082)
orf19.1451_4857	730.688	0.0200776	0.242185	0.420413	0.0200776	0.651855	-1.53408	FLT down vs GRD	8.37485	1.69151	0.721274	1	orf19.1451_4857	SRB9 , SRB9 , orf19.9026 | IPF25829.1 | Contig20119:23817..28814 , component of DNA-directed RNA polymerase II holoenzyme	SRB9	SRB9	component of DNA-directed RNA polymerase II holoenzyme	orf19.9026	IPF25829.1	Contig20119:23817..28814
orf19.1453_1564	762.125	0.00898999	0.443318	0.992682	0.00898999	2.13672	2.13672	FLT up vs GRD	11.7467	1.06865	8.95e-05	1	orf19.1453_1564	SPT5 , , orf19.9028 | IPF25736.1 | Contig20119:28986..31856 , transcription elongation factor	SPT5		transcription elongation factor	orf19.9028	IPF25736.1	Contig20119:28986..31856
orf19.1456_272	24.6875	0.769898	0.463107	0.87155	0.769898	1.3692	1.3692	FLT up vs GRD	0.091579	1.02496	0.0278731	1	orf19.1456_272	, , orf19.9031 | IPF25833.1 | Contig20119:33234..33728 , hypothetical protein			hypothetical protein	orf19.9031	IPF25833.1	Contig20119:33234..33728
orf19.1457_1294	449	0.126802	0.0158195	0.238062	0.126802	0.382781	-2.61246	FLT down vs GRD	2.90328	5.67304	1.62583	1	orf19.1457_1294	SSL1 , , orf19.9032 | IPF25773.1 | Contig20119:complement(33436..32018) , component of RNA polymerase transcription factor TFIIH	SSL1		component of RNA polymerase transcription factor TFIIH	orf19.9032	IPF25773.1	Contig20119:complement(33436..32018)
orf19.1458_262	454.875	0.29087	0.215549	0.0403664	0.29087	1.32303	1.32303	FLT up vs GRD	1.27886	1.81788	5.96893	1	orf19.1458_262	TAD2 , , orf19.9033 | IPF25800.1 | Contig20119:complement(34542..33730) , tRNA-specific adenosine deaminase subunit	TAD2		tRNA-specific adenosine deaminase subunit	orf19.9033	IPF25800.1	Contig20119:complement(34542..33730)
orf19.1459_634	670.625	0.327016	0.256385	0.466276	0.327016	0.860075	-1.16269	FLT down vs GRD	1.08987	1.63062	0.585118	1	orf19.1459_634	PPE1 , , orf19.9034 | IPF25793.1 | Contig20119:34783..35865 , carboxyl methyl esterase | ribosomal protein of the small subunit, mitochondrial	PPE1		carboxyl methyl esterase | ribosomal protein of the small subunit, mitochondrial	orf19.9034	IPF25793.1	Contig20119:34783..35865
orf19.1460_1987	1793.5	0.366983	0.884642	0.104467	0.366983	0.912434	-1.09597	FLT down vs GRD	0.914266	0.324641	3.35278	1	orf19.1460_1987	QNS1 , , orf19.9035 | IPF25753.1 | Contig20119:complement(38034..35890) , glutamine-dependent NAD(+) synthetase	QNS1		glutamine-dependent NAD(+) synthetase	orf19.9035	IPF25753.1	Contig20119:complement(38034..35890)
orf19.1461_677	357.375	0.519145	0.249953	0.745828	0.519145	0.731438	-1.36717	FLT down vs GRD	0.454638	1.6577	0.112605	1	orf19.1461_677	, , orf19.9036 | IPF25785.1 | Contig20119:38599..39768 , conserved hypothetical protein			conserved hypothetical protein	orf19.9036	IPF25785.1	Contig20119:38599..39768
orf19.1462_2259	1287.75	0.0716876	0.310907	0.044221	0.0716876	0.611234	-1.63604	FLT down vs GRD	4.30497	1.42853	5.68674	1	orf19.1462_2259	SMP2 , , orf19.9037 | IPF25747.1 | Contig20119:40160..42505 , involved in plasmid maintenance, respiration and cell proliferation (by homology)	SMP2		involved in plasmid maintenance, respiration and cell proliferation (by homology)	orf19.9037	IPF25747.1	Contig20119:40160..42505
orf19.1464_1580	2471.06	0.130834	0.31208	0.342968	0.130834	1.59034	1.59034	FLT up vs GRD	2.83317	1.42464	1.01606	1	orf19.1464_1580	IFQ4 , , orf19.9039 | IPF18203.2 | Contig20119:43284..45122 , gene family of unknown function	IFQ4		gene family of unknown function	orf19.9039	IPF18203.2	Contig20119:43284..45122
orf19.1465_481	308.313	0.504846	0.253719	0.0278294	0.504846	1.1202	1.1202	FLT up vs GRD	0.487462	1.64175	7.19439	1	orf19.1465_481	, , orf19.9040 | IPF25815.1 | Contig20119:45347..45892 , arylalkylamine n-acetyltransferase			arylalkylamine n-acetyltransferase	orf19.9040	IPF25815.1	Contig20119:45347..45892
orf19.1466_52	1375.88	0.794106	0.10162	0.0185436	0.794106	0.944093	-1.05922	FLT down vs GRD	0.0728186	2.7059	8.67791	1	orf19.1466_52	REX2 , , orf19.9041 | IPF25805.1 | Contig20119:46194..46907 , RNA exonuclease | oligoribonuclease	REX2		RNA exonuclease | oligoribonuclease	orf19.9041	IPF25805.1	Contig20119:46194..46907
orf19.1467_302	9965.75	0.574548	0.23054	0.398305	0.574548	1.17234	1.17234	FLT up vs GRD	0.342452	1.74464	0.796097	1	orf19.1467_302	COX13 , , orf19.9042 | IPF25830.1 | Contig20119:47262..47666 , cytochrome c oxidase subunit VIa	COX13		cytochrome c oxidase subunit VIa	orf19.9042	IPF25830.1	Contig20119:47262..47666
orf19.1468_1422	2015.75	0.197547	0.504606	0.0544058	0.197547	0.571457	-1.74991	FLT down vs GRD	1.97495	0.93913	5.07105	1	orf19.1468_1422	CDC55 , , orf19.9043 | IPF25772.1 | Contig20119:complement(49632..48073) , ser/thr phosphatase 2A regulatory subunit B	CDC55		ser/thr phosphatase 2A regulatory subunit B	orf19.9043	IPF25772.1	Contig20119:complement(49632..48073)
orf19.147_1845	877.188	0.824635	0.0831153	0.287358	0.824635	0.926894	-1.07887	FLT down vs GRD	0.0524284	2.96827	1.29906	1	orf19.147_1845	YAK2 , , orf19.7787 | IPF27150.1 | Contig20037:complement(9521..8106) | orf19.7788 | IPF16042.2 | Contig20037:complement(10537..9527) , serine-threonine protein kinase, PKA suppressor	YAK2		serine-threonine protein kinase, PKA suppressor	orf19.7787	IPF27150.1	Contig20037:complement(9521..8106)
orf19.1470_30	24748.6	0.750642	0.0483943	0.615021	0.750642	0.945249	-1.05792	FLT down vs GRD	0.108206	3.73665	0.273726	1	orf19.1470_30	RPS26A , , orf19.9045 | IPF25866.1 | Contig20119:complement(51261..50902) , 40S small subunit ribosomal protein S26A	RPS26A		40S small subunit ribosomal protein S26A	orf19.9045	IPF25866.1	Contig20119:complement(51261..50902)
orf19.1471_208	6646.38	0.252002	0.153715	0.0494425	0.252002	0.86589	-1.15488	FLT down vs GRD	1.5243	2.2004	5.35083	1	orf19.1471_208	COX4 , , orf19.9046 | IPF25835.1 | Contig20119:52938..53411 , cytochrome c oxidase subunit IV	COX4		cytochrome c oxidase subunit IV	orf19.9046	IPF25835.1	Contig20119:52938..53411
orf19.1473_640	277.688	0.100961	0.711593	0.504701	0.100961	1.59901	1.59901	FLT up vs GRD	3.4348	0.586265	0.487803	1	orf19.1473_640	MDH99 , , orf19.9048 | IPF25790.1 | Contig20119:54165..55259 , dehydrogenase	MDH99		dehydrogenase	orf19.9048	IPF25790.1	Contig20119:54165..55259
orf19.1474_3558	2023.25	0.00766622	0.194403	0.0747539	0.00766622	0.636742	-1.5705	FLT down vs GRD	12.5022	1.93209	4.19381	1	orf19.1474_3558	SLA1 , , orf19.9049 | IPF25863.1 | Contig20119:55513..59286 , SH3 domain protein involved in assembly of cortical actin cytoskeleton	SLA1		SH3 domain protein involved in assembly of cortical actin cytoskeleton	orf19.9049	IPF25863.1	Contig20119:55513..59286
orf19.1476_1451	76.125	0.0901816	0.106613	0.659983	0.0901816	0.580081	-1.7239	FLT down vs GRD	3.71209	2.64499	0.208638	1	orf19.1476_1451	IME4 , , orf19.9051 | IPF25770.1 | Contig20119:59606..61237 , activator of IME1 | meiosis | methyltransferase (putative)	IME4		activator of IME1 | meiosis | methyltransferase (putative)	orf19.9051	IPF25770.1	Contig20119:59606..61237
orf19.1477_24	1603.88	0.00793404	8.84e-05	0.735996	0.00793404	1.49956	1.49956	FLT up vs GRD	12.3367	26.4999	0.121899	1	orf19.1477_24	, , orf19.9052 | IPF25812.1 | Contig20119:complement(61818..61240) , conserved hypothetical protein			conserved hypothetical protein	orf19.9052	IPF25812.1	Contig20119:complement(61818..61240)
orf19.1478_1990	1361.69	0.0252957	0.0751999	0.428423	0.0252957	0.578522	-1.72854	FLT down vs GRD	7.52907	3.10337	0.695733	1	orf19.1478_1990	STT3 , , orf19.9053 | IPF25749.1 | Contig20119:complement(64542..62287) , oligosaccharyl transferase subunit | integral ER mmebrane subunit required for protein glycosylation	STT3		oligosaccharyl transferase subunit | integral ER mmebrane subunit required for protein glycosylation	orf19.9053	IPF25749.1	Contig20119:complement(64542..62287)
orf19.1479_2246	922.813	0.866222	0.213148	0.13271	0.866222	0.971919	-1.02889	FLT down vs GRD	0.0302602	1.83016	2.80152	1	orf19.1479_2246	, , orf19.9054 | IPF4398.3 | Contig20119:complement(67246..64913) , zinc finger protein			zinc finger protein	orf19.9054	IPF4398.3	Contig20119:complement(67246..64913)
orf19.1480_46	9578	0.0174692	0.220695	0.200281	0.0174692	0.700553	-1.42744	FLT down vs GRD	8.90965	1.79208	1.94838	1	orf19.1480_46	SDH6 , , orf19.9055 | IPF25808.1 | Contig20119:68516..69046 , succinate dehydrogenase	SDH6		succinate dehydrogenase	orf19.9055	IPF25808.1	Contig20119:68516..69046
orf19.1481_1682	1125.88	0.10501	0.463727	0.601211	0.10501	1.36238	1.36238	FLT up vs GRD	3.34042	1.02362	0.296032	1	orf19.1481_1682	, , orf19.9056 | IPF25743.1 | Contig20119:complement(71948..69432) , hypothetical protein			hypothetical protein	orf19.9056	IPF25743.1	Contig20119:complement(71948..69432)
orf19.1482_124	1603.44	0.040549	0.0355424	0.202603	0.040549	1.23508	1.23508	FLT up vs GRD	5.9548	4.22055	1.92621	1	orf19.1482_124	, , orf19.9057 | IPF25838.1 | Contig20119:72784..73104 , hypothetical protein			hypothetical protein	orf19.9057	IPF25838.1	Contig20119:72784..73104
orf19.1483_86	1566.06	0.126173	0.718248	0.466226	0.126173	1.42585	1.42585	FLT up vs GRD	2.91448	0.576166	0.585256	1	orf19.1483_86	, , orf19.9058 | IPF25853.1 | Contig20119:complement(73638..73243) , hypothetical protein			hypothetical protein	orf19.9058	IPF25853.1	Contig20119:complement(73638..73243)
orf19.1484_256	635.875	0.946911	0.0122361	0.546904	0.946911	1.01398	1.01398	FLT up vs GRD	0.00472029	6.19671	0.395603	1	orf19.1484_256	, , orf19.9059 | IPF25804.1 | Contig20119:73910..74668 , hypothetical protein			hypothetical protein	orf19.9059	IPF25804.1	Contig20119:73910..74668
orf19.1485_270	5181.06	0.102397	0.302343	0.862286	0.102397	1.21365	1.21365	FLT up vs GRD	3.40076	1.45745	0.0320893	1	orf19.1485_270	MRPL31 , , , mitochondrial ribosomal protein	MRPL31		mitochondrial ribosomal protein
orf19.1486_190	3887.75	2.73e-06	0.00125531	0.0096068	2.73e-06	2.11703	2.11703	FLT up vs GRD	135.126	12.621	11.4409	1	orf19.1486_190	, , orf19.9061 | IPF6011.2 | Contig20119:complement(78191..77694) , hypothetical protein			hypothetical protein	orf19.9061	IPF6011.2	Contig20119:complement(78191..77694)
orf19.1488_22	418.25	0.00405596	0.0666046	0.305604	0.00405596	2.21151	2.21151	FLT up vs GRD	15.8485	3.2714	1.19786	1	orf19.1488_22	, , orf19.9065 | IPF6006.2 | Contig20119:complement(86258..85599) , hypothetical protein			hypothetical protein	orf19.9065	IPF6006.2	Contig20119:complement(86258..85599)
orf19.149_350	103.75	0.898987	0.631077	0.0803673	0.898987	1.06227	1.06227	FLT up vs GRD	0.0171687	0.712807	4.00478	1	orf19.149_350	, , orf19.7789 | IPF27154.1 | Contig20037:11184..11546 , hypothetical protein			hypothetical protein	orf19.7789	IPF27154.1	Contig20037:11184..11546
orf19.1490_4048	1119	0.487903	0.250243	0.473468	0.487903	0.859161	-1.16393	FLT down vs GRD	0.528651	1.65646	0.565834	1	orf19.1490_4048	MSB2 , , orf19.9067 | IPF25849.1 | Contig20119:90674..94903 , integral membrane protein | cell surface flocculin	MSB2		integral membrane protein | cell surface flocculin	orf19.9067	IPF25849.1	Contig20119:90674..94903
orf19.1491_1035	246.188	0.9744	0.189665	0.674296	0.9744	0.989911	-1.01019	FLT down vs GRD	0.00109611	1.95971	0.190179	1	orf19.1491_1035	SNU71 , , orf19.9068 | IPF14405.2 | Contig20119:complement(98990..97152) , associated with U1 snRNP	SNU71		associated with U1 snRNP	orf19.9068	IPF14405.2	Contig20119:complement(98990..97152)
orf19.1492_1874	763.938	0.00613153	0.0969135	0.0043029	0.00613153	0.482088	-2.07431	FLT down vs GRD	13.615	2.76675	15.5145	1	orf19.1492_1874	PRP39 , , orf19.9069 | IPF25748.1 | Contig20119:99178..101511 , pre-mRNA splicing factor | U1 snRNP protein	PRP39		pre-mRNA splicing factor | U1 snRNP protein	orf19.9069	IPF25748.1	Contig20119:99178..101511
orf19.1493_1871	2800.88	0.00209138	0.143163	0.0570575	0.00209138	0.519915	-1.92339	FLT down vs GRD	19.9546	2.28416	4.93461	1	orf19.1493_1871	RAD7 , , orf19.9070 | IPF14400.2 | Contig20119:complement(103545..101569) , nucleotide excision repair protein | DNA replication and repair	RAD7		nucleotide excision repair protein | DNA replication and repair	orf19.9070	IPF14400.2	Contig20119:complement(103545..101569)
orf19.1494_272	1330	0.440837	0.200458	0.209206	0.440837	1.19103	1.19103	FLT up vs GRD	0.657682	1.89794	1.86501	1	orf19.1494_272	RAD23 , , orf19.9071 | IPF25788.1 | Contig20119:104621..105667 , nucleotide excision repair protein (ubiquitin-like protein)	RAD23		nucleotide excision repair protein (ubiquitin-like protein)	orf19.9071	IPF25788.1	Contig20119:104621..105667
orf19.1495_650	631.625	0.0172201	0.0298111	0.288923	0.0172201	0.355902	-2.80976	FLT down vs GRD	8.96597	4.5125	1.29002	1	orf19.1495_650	UTR4 , , orf19.9072 | IPF16638.1 | Contig20119:complement(106647..105832) , hydrolase	UTR4		hydrolase	orf19.9072	IPF16638.1	Contig20119:complement(106647..105832)
orf19.1496_931	344	0.360149	0.716789	0.226899	0.360149	1.46538	1.46538	FLT up vs GRD	0.942166	0.578376	1.71334	1	orf19.1496_931	, , orf19.9073 | IPF19614.1 | Contig20119:complement(109613..106998) , hypothetical protein			hypothetical protein	orf19.9073	IPF19614.1	Contig20119:complement(109613..106998)
orf19.1497_772	253.813	0.607861	0.0467057	0.00741061	0.607861	0.897182	-1.1146	FLT down vs GRD	0.285148	3.79055	12.6671	1	orf19.1497_772	, , , regulatory protein | potential fungal Zn(2)-Cys(6) binuclear cluster domain			regulatory protein | potential fungal Zn(2)-Cys(6) binuclear cluster domain
orf19.1499_3098	776.25	0.372988	0.504298	0.114183	0.372988	0.849393	-1.17731	FLT down vs GRD	0.890405	0.939743	3.14313	1	orf19.1499_3098	CTF1 , , orf19.9075 | IPF25868.1 | Contig20119:113528..117172 , cutinase transcription factor 1 alpha; potential fungal Zn(2)-Cys(6) binuclear cluster domain	CTF1		cutinase transcription factor 1 alpha; potential fungal Zn(2)-Cys(6) binuclear cluster domain	orf19.9075	IPF25868.1	Contig20119:113528..117172
orf19.15_74	69.9375	0.631187	0.579136	0.480542	0.631187	0.620909	-1.61054	FLT down vs GRD	0.249035	0.800569	0.547363	1	orf19.15_74	, , , hypothetical protein			hypothetical protein
orf19.150_343	2546.94	0.584241	0.151095	0.108814	0.584241	1.09088	1.09088	FLT up vs GRD	0.325049	2.22053	3.25596	1	orf19.150_343	TIM17 , , orf19.7790 | IPF16036.1 | Contig20037:12352..12816 , mitochondrial inner membrane import translocase subunit	TIM17		mitochondrial inner membrane import translocase subunit	orf19.7790	IPF16036.1	Contig20037:12352..12816
orf19.1500_608	982.625	0.324873	0.534338	0.107004	0.324873	0.819593	-1.22012	FLT down vs GRD	1.1002	0.881745	3.29565	1	orf19.1500_608	, , orf19.9076 | IPF15344.2 | Contig20119:complement(118822..117299) , hypothetical protein			hypothetical protein	orf19.9076	IPF15344.2	Contig20119:complement(118822..117299)
orf19.1502_39	552.438	0.0539712	0.378232	0.923165	0.0539712	1.71171	1.71171	FLT up vs GRD	5.09422	1.22827	0.0099066	1	orf19.1502_39	, , orf19.9078 | IPF25801.1 | Contig20119:119162..119929 , peptidyl-tRNA hydrolase			peptidyl-tRNA hydrolase	orf19.9078	IPF25801.1	Contig20119:119162..119929
orf19.1504_2238	923.75	0.361729	0.288154	0.578279	0.361729	0.864662	-1.15652	FLT down vs GRD	0.935643	1.5075	0.335681	1	orf19.1504_2238	, , orf19.9080 | IPF15348.2 | Contig20119:complement(123009..120445) , potential patatin-like phospholipase			potential patatin-like phospholipase	orf19.9080	IPF15348.2	Contig20119:complement(123009..120445)
orf19.1505_138	2485.13	0.04153	0.798948	0.202861	0.04153	0.512796	-1.95009	FLT down vs GRD	5.88025	0.455681	1.92376	1	orf19.1505_138	, , orf19.9081 | IPF13689.2 | Contig20119:complement(124977..123937) , hypothetical protein			hypothetical protein	orf19.9081	IPF13689.2	Contig20119:complement(124977..123937)
orf19.1506_233	33.5625	0.136599	0.399351	0.123199	0.136599	0.275392	-3.63119	FLT down vs GRD	2.73775	1.17346	2.96845	1	orf19.1506_233	, , orf19.9082 | IPF25845.1 | Contig20119:complement(127669..127232) , hypothetical protein			hypothetical protein	orf19.9082	IPF25845.1	Contig20119:complement(127669..127232)
orf19.1507_751	589.438	0.665844	0.208797	0.607917	0.665844	0.863439	-1.15816	FLT down vs GRD	0.200954	1.85285	0.285058	1	orf19.1507_751	AMN1 , , orf19.9083 | IPF25758.1 | Contig20119:complement(130092..128116) , Antagonist of MEN (Mitotic Exit Network) | chromosome stability	AMN1		Antagonist of MEN (Mitotic Exit Network) | chromosome stability	orf19.9083	IPF25758.1	Contig20119:complement(130092..128116)
orf19.1508_3	31.4375	0.820809	0.338923	0.73135	0.820809	0.649058	-1.5407	FLT down vs GRD	0.0547891	1.33983	0.126435	1	orf19.1508_3	, , , hypothetical protein			hypothetical protein
orf19.1509_2484	733.813	0.0072159	0.19	0.120128	0.0072159	0.548216	-1.8241	FLT down vs GRD	12.7975	1.95773	3.02601	1	orf19.1509_2484	ROD1 , , orf19.9084 | IPF19576.1 | Contig20119:complement(135663..132928) , O-dinitrobenzene, calcium and zinc resistance protein	ROD1		O-dinitrobenzene, calcium and zinc resistance protein	orf19.9084	IPF19576.1	Contig20119:complement(135663..132928)
orf19.151_1072	74.5625	0.00833722	0.0382963	0.0708795	0.00833722	0.551906	-1.8119	FLT down vs GRD	12.1004	4.1003	4.33529	1	orf19.151_1072	, , orf19.7792 | IPF19097.2 | Contig20037:complement(15619..13508) , amino acid permease			amino acid permease	orf19.7792	IPF19097.2	Contig20037:complement(15619..13508)
orf19.1510_1796	683.438	0.0689542	0.600706	0.282334	0.0689542	1.73466	1.73466	FLT up vs GRD	4.40935	0.763392	1.32858	1	orf19.1510_1796	, , orf19.9085 | IPF25762.1 | Contig20119:complement(139393..137603) , hypothetical transmembrane protein			hypothetical transmembrane protein	orf19.9085	IPF25762.1	Contig20119:complement(139393..137603)
orf19.1513_7759	2189.75	0.0722996	0.184089	0.209842	0.0722996	0.733585	-1.36317	FLT down vs GRD	4.2823	1.99329	1.85925	1	orf19.1513_7759	FAB1 , FAB1 , orf19.9088 | IPF9288.2 | Contig20119:complement(148129..140990) , phosphatidylinositol 3-phosphate 5-kinase	FAB1	FAB1	phosphatidylinositol 3-phosphate 5-kinase	orf19.9088	IPF9288.2	Contig20119:complement(148129..140990)
orf19.1514_838	2089.56	0.662635	0.424829	0.0827341	0.662635	0.80558	-1.24134	FLT down vs GRD	0.205139	1.11133	3.93012	1	orf19.1514_838	UBP1 , , orf19.9089 | IPF9290.2 | Contig20119:149924..150946 , ubiquitin-dependent protease	UBP1		ubiquitin-dependent protease	orf19.9089	IPF9290.2	Contig20119:149924..150946
orf19.1515_890	91.875	0.474504	0.151534	0.0988136	0.474504	0.718778	-1.39125	FLT down vs GRD	0.563098	2.21713	3.48687	1	orf19.1515_890	CHT4 , , orf19.9090 | IPF25787.1 | Contig20119:complement(152326..151160) , chitinase	CHT4		chitinase	orf19.9090	IPF25787.1	Contig20119:complement(152326..151160)
orf19.1516_2091	1301.88	0.554622	0.521093	0.200151	0.554622	0.713808	-1.40094	FLT down vs GRD	0.380221	0.906928	1.94964	1	orf19.1516_2091	UBP14 , , orf19.9091 | IPF17697.2 | Contig20119:152706..155060 , ubiquitin-specific protease	UBP14		ubiquitin-specific protease	orf19.9091	IPF17697.2	Contig20119:152706..155060
orf19.1517_87	2302.06	3.86e-05	0.000320712	0.00908261	3.86e-05	1.99602	1.99602	FLT up vs GRD	66.2068	18.6205	11.6991	1	orf19.1517_87	, , orf19.9092 | IPF25795.1 | Contig20119:155837..156919 , 2-dehydro-3-deoxy- phosphoheptonate aldolase			2-dehydro-3-deoxy- phosphoheptonate aldolase	orf19.9092	IPF25795.1	Contig20119:155837..156919
orf19.1519_2740	644.375	0.836405	0.230225	0.128979	0.836405	0.93387	-1.07081	FLT down vs GRD	0.04551	1.74612	2.86507	1	orf19.1519_2740	, , orf19.9094 | IPF25872.1 | Contig20119:157364..160666 , hypothetical protein			hypothetical protein	orf19.9094	IPF25872.1	Contig20119:157364..160666
orf19.1522_2848	246	0.846896	0.508657	0.263181	0.846896	1.08443	1.08443	FLT up vs GRD	0.0397756	0.931127	1.44844	1	orf19.1522_2848	, , orf19.9097 | IPF25875.1 | Contig20119:complement(164265..161137) , hypothetical protein			hypothetical protein	orf19.9097	IPF25875.1	Contig20119:complement(164265..161137)
orf19.1523_754	167.75	0.848122	0.100524	0.213023	0.848122	0.876943	-1.14033	FLT down vs GRD	0.0391315	2.71976	1.83083	1	orf19.1523_754	FMO1 , , orf19.9098 | IPF15750.2 | Contig20119:complement(167126..165468) , flavin-binding monooxygenase | flavoprotein	FMO1		flavin-binding monooxygenase | flavoprotein	orf19.9098	IPF15750.2	Contig20119:complement(167126..165468)
orf19.1524_1389	146.063	0.93891	0.989569	0.701659	0.93891	0.951367	-1.05112	FLT down vs GRD	0.00625393	0.0990397	0.157709	1	orf19.1524_1389	SPR3 , SPR3 , orf19.9099 | IPF15746.3 | Contig20119:168580..169575 , septin	SPR3	SPR3	septin	orf19.9099	IPF15746.3	Contig20119:168580..169575
orf19.1525_986	744.063	0.682513	0.647542	0.100828	0.682513	0.875175	-1.14263	FLT down vs GRD	0.180048	0.686133	3.43797	1	orf19.1525_986	NMD4 , , orf19.9101 | IPF18883.2 | Contig20119:171211..172407 , Upf1p-binding protein	NMD4		Upf1p-binding protein	orf19.9101	IPF18883.2	Contig20119:171211..172407
orf19.1526_4714	1322.63	0.843125	0.10285	0.0435542	0.843125	0.947268	-1.05567	FLT down vs GRD	0.0417904	2.69056	5.73326	1	orf19.1526_4714	SNF2 , , orf19.9102 | IPF15319.2 | Contig20119:173274..178346 , component of SWI/SNF global transcription activator complex	SNF2		component of SWI/SNF global transcription activator complex	orf19.9102	IPF15319.2	Contig20119:173274..178346
orf19.1527_279	1915.38	0.147718	0.933767	0.103103	0.147718	1.29471	1.29471	FLT up vs GRD	2.56794	0.239794	3.38426	1	orf19.1527_279	, , orf19.9103 | IPF25813.1 | Contig20119:complement(179069..178515) , hypothetical protein			hypothetical protein	orf19.9103	IPF25813.1	Contig20119:complement(179069..178515)
orf19.1528_727	1188.31	0.300618	0.449559	0.834095	0.300618	0.787666	-1.26957	FLT down vs GRD	1.22463	1.05466	0.0468273	1	orf19.1528_727	MTF1 , , orf19.9104 | IPF14920.2 | Contig20119:179571..180626 , mitochondrial RNA polymerase specificity factor	MTF1		mitochondrial RNA polymerase specificity factor	orf19.9104	IPF14920.2	Contig20119:179571..180626
orf19.1529_793	150.188	0.142692	0.198072	0.731875	0.142692	0.577705	-1.73099	FLT down vs GRD	2.64252	1.91125	0.125918	1	orf19.1529_793	, , orf19.9105 | IPF14919.2 | Contig20119:complement(182508..180841) , hypothetical protein			hypothetical protein	orf19.9105	IPF14919.2	Contig20119:complement(182508..180841)
orf19.153_519	69.8125	0.327177	0.348205	0.184002	0.327177	1.51809	1.51809	FLT up vs GRD	1.0891	1.31224	2.11436	1	orf19.153_519	, , , amino acid permease			amino acid permease
orf19.1530_121	27.4375	0.929789	0.195917	0.664577	0.929789	0.914821	-1.09311	FLT down vs GRD	0.0082671	1.92344	0.2026	1	orf19.1530_121	, , , hypothetical protein			hypothetical protein
orf19.1531_1479	295.875	0.735667	0.889527	0.468068	0.735667	0.863371	-1.15825	FLT down vs GRD	0.122217	0.316729	0.580264	1	orf19.1531_1479	RNA14 , , orf19.9106 | IPF25746.1 | Contig20119:complement(185120..182748) , mRNA 3'-end processing protein	RNA14		mRNA 3'-end processing protein	orf19.9106	IPF25746.1	Contig20119:complement(185120..182748)
orf19.1532_826	949.688	0.0713705	0.155415	0.00466938	0.0713705	0.754351	-1.32564	FLT down vs GRD	4.31681	2.18754	15.0608	1	orf19.1532_826	TOM37 , , orf19.9107 | IPF25786.1 | Contig20119:185924..186994 , mitochondrial outer membrane import receptor subunit | translocase	TOM37		mitochondrial outer membrane import receptor subunit | translocase	orf19.9107	IPF25786.1	Contig20119:185924..186994
orf19.1533_375	821.75	0.0746874	0.0116778	0.00114695	0.0746874	1.29021	1.29021	FLT up vs GRD	4.19616	6.29549	24.3219	1	orf19.1533_375	, , orf19.9108 | IPF15116.1 | Contig20119:188001..189377 , conserved hypothetical protein			conserved hypothetical protein	orf19.9108	IPF15116.1	Contig20119:188001..189377
orf19.1534_598	313.125	0.353171	0.0243702	0.619058	0.353171	0.876433	-1.14099	FLT down vs GRD	0.971513	4.86254	0.267419	1	orf19.1534_598	ZRT3 , , orf19.9109 | IPF15119.2 | Contig20119:190334..192115 , vacuolar Zn-iron permease	ZRT3		vacuolar Zn-iron permease	orf19.9109	IPF15119.2	Contig20119:190334..192115
orf19.1535_559	697.125	0.430862	0.399262	0.360389	0.430862	0.874883	-1.14301	FLT down vs GRD	0.688111	1.17369	0.941176	1	orf19.1535_559	, , orf19.9110 | IPF25803.1 | Contig20119:complement(193424..192630) , hypothetical protein			hypothetical protein	orf19.9110	IPF25803.1	Contig20119:complement(193424..192630)
orf19.1536_973	1334.19	0.333319	0.114106	0.570986	0.333319	1.1317	1.1317	FLT up vs GRD	1.06007	2.55982	0.349004	1	orf19.1536_973	ZRC1 , , , zinc- and cadmium resistance protein	ZRC1		zinc- and cadmium resistance protein
orf19.1538_1165	632.188	0.837418	0.731857	0.199896	0.837418	1.05598	1.05598	FLT up vs GRD	0.0449386	0.555632	1.95209	1	orf19.1538_1165	TLG2 , , orf19.9112 | IPF14397.2 | Contig20119:complement(199104..197836) , member of the syntaxin family of t-SNAREs	TLG2		member of the syntaxin family of t-SNAREs	orf19.9112	IPF14397.2	Contig20119:complement(199104..197836)
orf19.1539_948	163.688	0.714201	0.573184	0.765353	0.714201	0.880422	-1.13582	FLT down vs GRD	0.144011	0.81103	0.0953649	1	orf19.1539_948	, , orf19.9113 | IPF25782.1 | Contig20119:complement(201788..200622) , hypothetical protein			hypothetical protein	orf19.9113	IPF25782.1	Contig20119:complement(201788..200622)
orf19.154_577	345	0.278971	0.0280442	0.773711	0.278971	0.82734	-1.20869	FLT down vs GRD	1.34877	4.61684	0.0884683	1	orf19.154_577	UTP30 , , orf19.7793 | IPF19598.1 | Contig20037:complement(17255..16146) , conserved hypothetical protein	UTP30		conserved hypothetical protein	orf19.7793	IPF19598.1	Contig20037:complement(17255..16146)
orf19.1541_2163	39.8125	0.945535	0.861111	0.816726	0.945535	1.04568	1.04568	FLT up vs GRD	0.00496858	0.361795	0.0573691	1	orf19.1541_2163	, , orf19.9115 | IPF18788.2 | Contig20119:complement(209423..206523) , hypothetical protein			hypothetical protein	orf19.9115	IPF18788.2	Contig20119:complement(209423..206523)
orf19.1542_86	577.875	0.0834007	0.272371	0.149229	0.0834007	1.55439	1.55439	FLT up vs GRD	3.90959	1.56659	2.54617	1	orf19.1542_86	HEX3 , , orf19.9116 | IPF25764.1 | Contig20119:complement(213624..211816) , hexome metabolism	HEX3		hexome metabolism	orf19.9116	IPF25764.1	Contig20119:complement(213624..211816)
orf19.1543_858	615.688	0.688422	0.955258	0.0798361	0.688422	1.09025	1.09025	FLT up vs GRD	0.172965	0.196283	4.02193	1	orf19.1543_858	, , orf19.9117 | IPF25784.1 | Contig20119:complement(215797..214496) , hypothetical protein			hypothetical protein	orf19.9117	IPF25784.1	Contig20119:complement(215797..214496)
orf19.1544_706	920.313	0.148719	0.541961	0.243772	0.148719	0.693847	-1.44124	FLT down vs GRD	2.55348	0.867513	1.58326	1	orf19.1544_706	, , orf19.9118 | IPF6504.2 | Contig20119:218612..219409 , hypothetical protein | coiled coils			hypothetical protein | coiled coils	orf19.9118	IPF6504.2	Contig20119:218612..219409
orf19.1545_403	2721.88	0.296955	0.319754	0.110523	0.296955	1.11679	1.11679	FLT up vs GRD	1.2447	1.39958	3.21927	1	orf19.1545_403	MRPS8 , , orf19.9119 | IPF25834.1 | Contig20119:complement(219985..219518) , mitochondrial ribosome protein, small subunit	MRPS8		mitochondrial ribosome protein, small subunit	orf19.9119	IPF25834.1	Contig20119:complement(219985..219518)
orf19.1546_157	1284.88	0.00436753	0.0980679	0.254865	0.00436753	1.66936	1.66936	FLT up vs GRD	15.431	2.75149	1.50442	1	orf19.1546_157	, , orf19.9120 | IPF25799.1 | Contig20119:220297..221175 , conserved hypothetical protein			conserved hypothetical protein	orf19.9120	IPF25799.1	Contig20119:220297..221175
orf19.1547_751	240.813	0.577986	0.339287	0.109517	0.577986	1.30446	1.30446	FLT up vs GRD	0.336209	1.33873	3.24078	1	orf19.1547_751	TPP1 , , orf19.9121 | IPF25796.1 | Contig20119:complement(221960..221196) , Three Prime Phosphatase 1 | DNA 3' phosphatase | similarity to mammalian polynucleotide kinase 3'- phosphatase	TPP1		Three Prime Phosphatase 1 | DNA 3' phosphatase | similarity to mammalian polynucleotide kinase 3'- phosphatase	orf19.9121	IPF25796.1	Contig20119:complement(221960..221196)
orf19.1548_490	649.938	0.280368	0.352967	0.149835	0.280368	1.14727	1.14727	FLT up vs GRD	1.34034	1.29841	2.53751	1	orf19.1548_490	SNU23 , , orf19.9122 | IPF25806.1 | Contig20119:222153..222884 , U4/U6.U5 snRNP associated protein | RNA binding zinc finger protein (putative)	SNU23		U4/U6.U5 snRNP associated protein | RNA binding zinc finger protein (putative)	orf19.9122	IPF25806.1	Contig20119:222153..222884
orf19.1549_593	1538.13	0.149798	0.907726	0.813582	0.149798	0.76705	-1.3037	FLT down vs GRD	2.53804	0.286425	0.0593988	1	orf19.1549_593	, , orf19.9123 | IPF25802.1 | Contig20119:223306..224052 , hypothetical transmembrane protein			hypothetical transmembrane protein	orf19.9123	IPF25802.1	Contig20119:223306..224052
orf19.155_592	748.438	0.400685	0.181432	0.330456	0.400685	1.27894	1.27894	FLT up vs GRD	0.787721	2.00972	1.0735	1	orf19.155_592	URE2 , , orf19.7794 | IPF15126.2 | Contig20037:complement(18691..17657) , glutathione S- transferase, nitrogen catabolite repression regulator	URE2		glutathione S- transferase, nitrogen catabolite repression regulator	orf19.7794	IPF15126.2	Contig20037:complement(18691..17657)
orf19.1551_362	319.438	0.982123	0.194106	0.0306913	0.982123	0.99286	-1.00719	FLT down vs GRD	0.000534393	1.9338	6.85991	1	orf19.1551_362	, , orf19.9125 | IPF25828.1 | Contig20119:224680..225186 , hypothetical protein			hypothetical protein	orf19.9125	IPF25828.1	Contig20119:224680..225186
orf19.1552_73	4882.94	0.527211	0.199086	0.0163696	0.527211	0.903475	-1.10684	FLT down vs GRD	0.436865	1.90557	9.16624	1	orf19.1552_73	CPR3 , , orf19.9126 | IPF25810.1 | Contig20119:complement(224933..224358) , cyclophilin (peptidylprolyl isomerase)	CPR3		cyclophilin (peptidylprolyl isomerase)	orf19.9126	IPF25810.1	Contig20119:complement(224933..224358)
orf19.1553_747	1693.06	0.97344	0.135928	0.538641	0.97344	1.00442	1.00442	FLT up vs GRD	0.00117988	2.34602	0.412557	1	orf19.1553_747	ENT3 , , orf19.9127.3 | IPF25779.1 | Contig20119:complement(226927..226781) | orf19.9127 | IPF25794.1 | Contig20119:complement(226452..225445) | orf19.9127.2 | IPF25744.1 | Contig20119:complement(226727..226512) , epsin | putative endocytosis and cytoskeleton protein	ENT3		epsin | putative endocytosis and cytoskeleton protein	orf19.9127.3	IPF25779.1	Contig20119:complement(226927..226781)
orf19.1555_3559	679.938	0.655501	0.465637	0.332407	0.655501	0.950076	-1.05255	FLT down vs GRD	0.214635	1.01951	1.06433	1	orf19.1555_3559	SAC3 , , orf19.9129 | IPF7130.2 | Contig20119:complement(231231..227554) , involved in processes affecting the actin cytoskeleton and mitosis | leucine permease transcriptional regulator	SAC3		involved in processes affecting the actin cytoskeleton and mitosis | leucine permease transcriptional regulator	orf19.9129	IPF7130.2	Contig20119:complement(231231..227554)
orf19.1557_71	341.375	0.000544663	0.00480952	0.00182275	0.000544663	0.556108	-1.79821	FLT down vs GRD	30.7382	8.40408	20.8965	1	orf19.1557_71	, , orf19.9130 | IPF7133.1 | Contig20119:complement(232198..231599) , conserved hypothetical membrane protein			conserved hypothetical membrane protein	orf19.9130	IPF7133.1	Contig20119:complement(232198..231599)
orf19.1559_949	3442.75	0.894354	0.816083	0.986337	0.894354	0.96346	-1.03793	FLT down vs GRD	0.018791	0.430143	0.000312114	1	orf19.1559_949	HOM2 , , orf19.9132 | IPF7136.1 | Contig20119:complement(233736..232639) , aspartate-semialdehyde dehydrogenase | threonine and methionine pathway	HOM2		aspartate-semialdehyde dehydrogenase | threonine and methionine pathway	orf19.9132	IPF7136.1	Contig20119:complement(233736..232639)
orf19.156_1079	407.375	0.356925	0.768932	0.0624604	0.356925	1.33718	1.33718	FLT up vs GRD	0.955617	0.500266	4.68018	1	orf19.156_1079	, , orf19.7795 | IPF27149.1 | Contig20037:complement(21912..19888) , hypothetical protein			hypothetical protein	orf19.7795	IPF27149.1	Contig20037:complement(21912..19888)
orf19.1560_665	1324.31	0.0982861	0.0247173	0.0472615	0.0982861	1.28531	1.28531	FLT up vs GRD	3.49989	4.83742	5.48537	1	orf19.1560_665	POB3 , , orf19.9133 | IPF25771.1 | Contig20119:234271..235887 , DNA polymerase delta binding protein	POB3		DNA polymerase delta binding protein	orf19.9133	IPF25771.1	Contig20119:234271..235887
orf19.1562_463	3682.25	0.00316942	0.233956	0.243413	0.00316942	1.98111	1.98111	FLT up vs GRD	17.2975	1.72874	1.5859	1	orf19.1562_463	, , orf19.9135 | IPF25811.1 | Contig20119:237713..238255 , hypothetical protein			hypothetical protein	orf19.9135	IPF25811.1	Contig20119:237713..238255
orf19.1563_1488	1228.13	0.0531498	0.191765	0.183105	0.0531498	0.79031	-1.26533	FLT down vs GRD	5.13868	1.94737	2.12408	1	orf19.1563_1488	ECM3 , , orf19.9136 | IPF25768.1 | Contig20119:239681..241321 , membrane protein involved in cell wall biogenesis and architecture | calcofluor sensitivity	ECM3		membrane protein involved in cell wall biogenesis and architecture | calcofluor sensitivity	orf19.9136	IPF25768.1	Contig20119:239681..241321
orf19.1564_180	6931.06	0.0905051	0.0947367	0.0552214	0.0905051	0.822899	-1.21522	FLT down vs GRD	3.70315	2.79612	5.0282	1	orf19.1564_180	, , orf19.9137 | IPF25819.1 | Contig20119:241721..242290 , conserved hypothetical membrane protein			conserved hypothetical membrane protein	orf19.9137	IPF25819.1	Contig20119:241721..242290
orf19.1565_1703	661.125	0.367136	0.192285	0.520467	0.367136	0.808837	-1.23634	FLT down vs GRD	0.913648	1.94434	0.45169	1	orf19.1565_1703	DUS3 , , orf19.9138 | IPF25756.1 | Contig20119:complement(244211..242370) , dihydrouridine synthase of tRNA	DUS3		dihydrouridine synthase of tRNA	orf19.9138	IPF25756.1	Contig20119:complement(244211..242370)
orf19.1566_2050	1013	0.132907	0.238881	0.78719	0.132907	0.73666	-1.35748	FLT down vs GRD	2.79823	1.70628	0.0779401	1	orf19.1566_2050	UTP21 , , orf19.9139 | IPF25737.1 | Contig20119:244435..247263 , U3 snoRNP protein | strong similarity to S. pombe beta-transducin	UTP21		U3 snoRNP protein | strong similarity to S. pombe beta-transducin	orf19.9139	IPF25737.1	Contig20119:244435..247263
orf19.1567_3014	672.625	0.582238	0.0103626	0.238718	0.582238	0.896624	-1.11529	FLT down vs GRD	0.328595	6.55345	1.62087	1	orf19.1567_3014	VAM6 , , orf19.9141 | IPF25780.1 | Contig20119:249312..250691 | orf19.9140 | IPF25769.1 | Contig20119:247587..249245 , vacuolar carboxypeptidase Y	VAM6		vacuolar carboxypeptidase Y	orf19.9141	IPF25780.1	Contig20119:249312..250691
orf19.1569_3125	1282.69	0.361827	0.543825	0.193367	0.361827	0.792976	-1.26107	FLT down vs GRD	0.935243	0.864061	2.01655	1	orf19.1569_3125	UTP22 , , orf19.9142 | IPF8275.2 | Contig20119:complement(254450..250923) , U3 protein	UTP22		U3 protein	orf19.9142	IPF8275.2	Contig20119:complement(254450..250923)
orf19.157_333	1002.63	0.404764	0.0025907	0.633097	0.404764	0.922438	-1.08408	FLT down vs GRD	0.773554	10.173	0.246215	1	orf19.157_333	, , orf19.7796 | IPF27152.1 | Contig20037:complement(22940..22446) , hypothetical protein			hypothetical protein	orf19.7796	IPF27152.1	Contig20037:complement(22940..22446)
orf19.1570_1561	666.625	0.383808	0.233723	0.448456	0.383808	0.84076	-1.1894	FLT down vs GRD	0.848895	1.72982	0.635211	1	orf19.1570_1561	ERG7 , ERG7 , orf19.9143 | IPF8270.1 | Contig20119:254894..257086 , lanosterol synthase | 2,3-oxidosqualene cyclase	ERG7	ERG7	lanosterol synthase | 2,3-oxidosqualene cyclase	orf19.9143	IPF8270.1	Contig20119:254894..257086
orf19.1571_318	24.3125	0.3552	0.551279	0.305286	0.3552	0.569115	-1.75712	FLT down vs GRD	0.962891	0.85036	1.19955	1	orf19.1571_318	AFF8 , , orf19.9144 | IPF18269.2 | Contig20119:complement(258031..257345) | orf19.9145 | IPF25857.1 | Contig20119:complement(258195..257791) , Ady2-Fun34 like Family, possible transmembrane acetate facilitator/sensor	AFF8		Ady2-Fun34 like Family, possible transmembrane acetate facilitator/sensor	orf19.9144	IPF18269.2	Contig20119:complement(258031..257345)
orf19.1573_3885	1823.06	0.164448	0.931046	0.785887	0.164448	0.747953	-1.33698	FLT down vs GRD	2.34213	0.244913	0.0789265	1	orf19.1573_3885	ATC9 , , orf19.9146 | IPF8267.2 | Contig20119:complement(263490..259438) , cation translocating P-type ATPase	ATC9		cation translocating P-type ATPase	orf19.9146	IPF8267.2	Contig20119:complement(263490..259438)
orf19.1574_1419	788.563	0.529091	0.351217	0.185324	0.529091	0.743654	-1.34471	FLT down vs GRD	0.432797	1.30347	2.10015	1	orf19.1574_1419	TAF67 , , orf19.9147 | IPF15686.2 | Contig20119:264024..265793 , TFIID subunit | component of the TAF(II) complex	TAF67		TFIID subunit | component of the TAF(II) complex	orf19.9147	IPF15686.2	Contig20119:264024..265793
orf19.1575_446	1270	0.0257583	0.143372	0.0105044	0.0257583	0.634811	-1.57527	FLT down vs GRD	7.46487	2.28243	11.0375	1	orf19.1575_446	PRS1 , PRS1 , orf19.9148 | IPF15685.2 | Contig20119:266182..267144 , ribose-phosphate pyrophosphokinase	PRS1	PRS1	ribose-phosphate pyrophosphokinase	orf19.9148	IPF15685.2	Contig20119:266182..267144
orf19.1576_1168	468.813	0.167185	0.0751681	0.0994272	0.167185	1.35548	1.35548	FLT up vs GRD	2.30811	3.10395	3.47184	1	orf19.1576_1168	, , orf19.9149 | IPF25763.1 | Contig20119:267565..269433 , hypothetical RING-finger protein | homolog to human breast cancer-associated protein BRAP2			hypothetical RING-finger protein | homolog to human breast cancer-associated protein BRAP2	orf19.9149	IPF25763.1	Contig20119:267565..269433
orf19.1577_850	210.188	0.553786	0.733145	0.0231125	0.553786	1.18258	1.18258	FLT up vs GRD	0.381867	0.553696	7.85339	1	orf19.1577_850	GAT2 , , orf19.9150 | IPF25781.1 | Contig20119:270537..271865 ,	GAT2			orf19.9150	IPF25781.1	Contig20119:270537..271865
orf19.1578_4861	1152	0.0812584	0.147838	0.200792	0.0812584	0.60616	-1.64973	FLT down vs GRD	3.97634	2.24616	1.94348	1	orf19.1578_4861	RRP5 , , orf19.9151 | IPF25824.1 | Contig20119:272233..277401 , processing of pre-rRNA to 18S and 5.8S rRNA	RRP5		processing of pre-rRNA to 18S and 5.8S rRNA	orf19.9151	IPF25824.1	Contig20119:272233..277401
orf19.158_284	1571.63	0.390217	0.347723	0.10176	0.390217	0.818037	-1.22244	FLT down vs GRD	0.825169	1.31366	3.41578	1	orf19.158_284	APD1 , , , cell structure: actin patch localization | weak similarity to potato sucrose cleavage protein	APD1		cell structure: actin patch localization | weak similarity to potato sucrose cleavage protein
orf19.1580_1716	196.875	0.447703	0.0946588	0.0132529	0.447703	0.745779	-1.34088	FLT down vs GRD	0.637403	2.79719	10.0304	1	orf19.1580_1716	, , orf19.9153 | IPF25755.1 | Contig20119:complement(279869..277758) , hypothetical protein			hypothetical protein	orf19.9153	IPF25755.1	Contig20119:complement(279869..277758)
orf19.1581_2	74.75	0.0697442	0.53786	0.148766	0.0697442	2.18452	2.18452	FLT up vs GRD	4.37864	0.875147	2.55281	1	orf19.1581_2	, , , hypothetical protein			hypothetical protein
orf19.1582_1288	132.75	0.311502	0.409893	0.874337	0.311502	0.705458	-1.41752	FLT down vs GRD	1.16702	1.14726	0.0266646	1	orf19.1582_1288	HOL5 , , orf19.9155 | IPF25814.1 | Contig20119:281898..282512 | orf19.9156 | IPF25792.1 | Contig20119:282666..283625 , member of major facilitator superfamily multidrug-resistance protein subfamily 1	HOL5		member of major facilitator superfamily multidrug-resistance protein subfamily 1	orf19.9155	IPF25814.1	Contig20119:281898..282512
orf19.1584_1218	425.063	0.0227372	0.734539	0.836447	0.0227372	1.82017	1.82017	FLT up vs GRD	7.91305	0.551602	0.0454862	1	orf19.1584_1218	MCH , , orf19.9157 | IPF25774.1 | Contig20119:283950..285482 , similarity to monocarboxylate transporters	MCH		similarity to monocarboxylate transporters	orf19.9157	IPF25774.1	Contig20119:283950..285482
orf19.1585_77	491.125	0.649334	0.99521	0.605276	0.649334	0.815996	-1.2255	FLT down vs GRD	0.223059	0.0703052	0.289347	1	orf19.1585_77	ZRT2 , , orf19.9158 | IPF25789.1 | Contig20119:286865..287977 , low affinity zinc transporter	ZRT2		low affinity zinc transporter	orf19.9158	IPF25789.1	Contig20119:286865..287977
orf19.1586_245	1285.69	0.00061197	0.0424612	0.0747829	0.00061197	0.578681	-1.72807	FLT down vs GRD	29.6534	3.9374	4.19279	1	orf19.1586_245	PLC3 , , orf19.9159 | IPF25798.1 | Contig20119:complement(289271..288384) , phosphatidylinositol phospholipase C	PLC3		phosphatidylinositol phospholipase C	orf19.9159	IPF25798.1	Contig20119:complement(289271..288384)
orf19.1587_1290	171.625	0.33796	0.207972	0.00725926	0.33796	1.25162	1.25162	FLT up vs GRD	1.03866	1.85722	12.7681	1	orf19.1587_1290	, , orf19.9160 | IPF25777.1 | Contig20119:complement(291182..289671) , hexose transporter of the major facilitator superfamily			hexose transporter of the major facilitator superfamily	orf19.9160	IPF25777.1	Contig20119:complement(291182..289671)
orf19.1588_50	1714.06	0.767868	0.00290877	0.00106417	0.767868	0.974483	-1.02619	FLT down vs GRD	0.0932597	9.82099	24.9143	1	orf19.1588_50	, , orf19.9161 | IPF25850.1 | Contig20119:291921..292340 , conserved hypothetical protein			conserved hypothetical protein	orf19.9161	IPF25850.1	Contig20119:291921..292340
orf19.1589_1219	217.188	0.79643	0.979281	0.654702	0.79643	1.08758	1.08758	FLT up vs GRD	0.0711402	0.135493	0.215716	1	orf19.1589_1219	RRN7 , , orf19.9162 | IPF25783.1 | Contig20119:292999..294192 , component of RNA polymerase I core transcription factor	RRN7		component of RNA polymerase I core transcription factor	orf19.9162	IPF25783.1	Contig20119:292999..294192
orf19.1590_662	119.5	0.103146	0.458412	0.215055	0.103146	0.361733	-2.76447	FLT down vs GRD	3.38326	1.03515	1.81296	1	orf19.1590_662	, , , hypothetical protein			hypothetical protein
orf19.1591_721	19602.9	0.0104396	0.254937	0.919358	0.0104396	0.748814	-1.33545	FLT down vs GRD	11.0652	1.63665	0.0109167	1	orf19.1591_721	ERG10 , , , acetyl-CoA acetyltransferase | acetoacetyl CoA thiolase	ERG10		acetyl-CoA acetyltransferase | acetoacetyl CoA thiolase
orf19.1592_601	1443.31	0.0742161	0.280427	0.264503	0.0742161	0.725699	-1.37798	FLT down vs GRD	4.21288	1.53595	1.43977	1	orf19.1592_601	, , , conserved hypothetical protein			conserved hypothetical protein
orf19.1593_1112	2208.19	0.758321	0.177413	0.49143	0.758321	0.948464	-1.05434	FLT down vs GRD	0.101391	2.03512	0.519864	1	orf19.1593_1112	RIM11 , , , ser/thr protein kinase | glycogen synthase kinase 3	RIM11		ser/thr protein kinase | glycogen synthase kinase 3
orf19.1594_492	359.25	0.979941	0.665907	0.38348	0.979941	0.995789	-1.00423	FLT down vs GRD	0.00067287	0.656919	0.850129	1	orf19.1594_492	, , , hypothetical protein			hypothetical protein
orf19.1595_864	325.875	0.95979	0.00411945	0.554105	0.95979	0.989939	-1.01016	FLT down vs GRD	0.00270584	8.82185	0.381239	1	orf19.1595_864	, , orf19.9163 | IPF25734.1 | Contig20121:complement(1694..3) , conserved hypothetical protein			conserved hypothetical protein	orf19.9163	IPF25734.1	Contig20121:complement(1694..3)
orf19.1596_69	103.188	0.516906	0.828272	0.901419	0.516906	1.48558	1.48558	FLT up vs GRD	0.459666	0.411868	0.0163469	1	orf19.1596_69	, , orf19.9164 | IPF17205.1 | Contig20121:complement(3696..2329) , hypothetical protein			hypothetical protein	orf19.9164	IPF17205.1	Contig20121:complement(3696..2329)
orf19.1597_203	1002.25	0.760472	0.10282	0.502741	0.760472	0.934525	-1.07006	FLT down vs GRD	0.0995255	2.69093	0.492441	1	orf19.1597_203	, , orf19.9165 | IPF25726.1 | Contig20122:2..652 , hypothetical protein			hypothetical protein	orf19.9165	IPF25726.1	Contig20122:2..652
orf19.1598_1274	2195	0.000167712	0.00289152	0.554975	0.000167712	0.489429	-2.0432	FLT down vs GRD	43.686	9.83883	0.379529	1	orf19.1598_1274	ERG24 , , orf19.9166 | IPF25723.1 | Contig20122:complement(2138..792) , sterol C-14 reductase	ERG24		sterol C-14 reductase	orf19.9166	IPF25723.1	Contig20122:complement(2138..792)
orf19.1599_29	20.8125	0.839688	0.754579	0.218925	0.839688	1.27579	1.27579	FLT up vs GRD	0.0436719	0.521625	1.7796	1	orf19.1599_29	, , orf19.9167 | IPF3759.2 | Contig20122:5512..5874 , hypothetical protein			hypothetical protein	orf19.9167	IPF3759.2	Contig20122:5512..5874
orf19.16_623	101.313	0.809735	0.424885	0.261855	0.809735	0.892136	-1.12091	FLT down vs GRD	0.061934	1.1112	1.4572	1	orf19.16_623	, , , hypothetical protein			hypothetical protein
orf19.160_309	121.25	0.379754	0.0579125	0.0448196	0.379754	1.68423	1.68423	FLT up vs GRD	0.864231	3.47087	5.64572	1	orf19.160_309	, , , hypothetical protein			hypothetical protein
orf19.1600_1935	674.875	0.975636	0.746469	0.930011	0.975636	1.00655	1.00655	FLT up vs GRD	0.000992791	0.533731	0.00821465	1	orf19.1600_1935	, , orf19.9168 | IPF25722.1 | Contig20122:6727..8856 , hypothetical protein			hypothetical protein	orf19.9168	IPF25722.1	Contig20122:6727..8856
orf19.1601_941	16771.9	0.68477	0.211255	0.0975712	0.68477	1.07576	1.07576	FLT up vs GRD	0.177322	1.83997	3.51768	1	orf19.1601_941	RPL3 , , orf19.9169 | IPF25724.1 | Contig20122:9380..10549 , 60S large subunit ribosomal protein L3.e	RPL3		60S large subunit ribosomal protein L3.e	orf19.9169	IPF25724.1	Contig20122:9380..10549
orf19.1604_2613	1409.19	0.204192	0.0762599	0.0177356	0.204192	1.18635	1.18635	FLT up vs GRD	1.91123	3.0843	8.85056	1	orf19.1604_2613	, , orf19.9172 | IPF25717.1 | Contig20122:complement(20506..17756) , hypothetical protein			hypothetical protein	orf19.9172	IPF25717.1	Contig20122:complement(20506..17756)
orf19.1605_2515	552.063	0.880488	0.00427017	0.0223577	0.880488	0.980418	-1.01997	FLT down vs GRD	0.0240952	8.72349	7.97466	1	orf19.1605_2515	PMS1 , , orf19.9173 | IPF25719.1 | Contig20122:complement(26721..24064) , DNA mismatch repair protein	PMS1		DNA mismatch repair protein	orf19.9173	IPF25719.1	Contig20122:complement(26721..24064)
orf19.1606_681	878.25	0.00104784	0.0814135	0.828826	0.00104784	2.54181	2.54181	FLT up vs GRD	25.038	2.99595	0.0499062	1	orf19.1606_681	, , orf19.9174 | IPF19678.2 | Contig20123:complement(1899..301) , hypothetical protein			hypothetical protein	orf19.9174	IPF19678.2	Contig20123:complement(1899..301)
orf19.1607_2114	1326.5	3.52e-05	0.0266286	0.607018	3.52e-05	2.24116	2.24116	FLT up vs GRD	67.9216	4.70651	0.286514	1	orf19.1607_2114	ALR1 , , orf19.9175 | IPF13562.2 | Contig20123:5512..8310 , putative divalent cation transporter	ALR1		putative divalent cation transporter	orf19.9175	IPF13562.2	Contig20123:5512..8310
orf19.1608_1639	316	0.804074	0.0474912	0.250224	0.804074	1.04579	1.04579	FLT up vs GRD	0.0657675	3.76518	1.5368	1	orf19.1608_1639	, , orf19.9176 | IPF25615.1 | Contig20123:9274..11040 , hypothetical arylsulfatase			hypothetical arylsulfatase	orf19.9176	IPF25615.1	Contig20123:9274..11040
orf19.1609_1116	576.625	0.98876	0.936043	0.709705	0.98876	0.994974	-1.00505	FLT down vs GRD	0.000211216	0.235458	0.148838	1	orf19.1609_1116	KRI1 , , orf19.9177 | IPF13565.2 | Contig20123:complement(13196..11190) , Krr1p binding protein	KRI1		Krr1p binding protein	orf19.9177	IPF13565.2	Contig20123:complement(13196..11190)
orf19.1610_1018	502.188	0.490284	0.435855	0.0184529	0.490284	1.12915	1.12915	FLT up vs GRD	0.522706	1.08565	8.69681	1	orf19.1610_1018	, , orf19.9178 | IPF13567.2 | Contig20123:complement(14652..13498) , hypothetical protein			hypothetical protein	orf19.9178	IPF13567.2	Contig20123:complement(14652..13498)
orf19.1611_418	65.625	0.218107	0.192106	0.802182	0.218107	0.241736	-4.13674	FLT down vs GRD	1.78658	1.94538	0.067076	1	orf19.1611_418	, , orf19.9179 | IPF18870.2 | Contig20123:15342..16304 , hypothetical protein			hypothetical protein	orf19.9179	IPF18870.2	Contig20123:15342..16304
orf19.1613_1887	4786.44	4.85e-05	6.8e-05	0.0941914	4.85e-05	0.659377	-1.51658	FLT down vs GRD	62.1634	28.438	3.60414	1	orf19.1613_1887	ILV2 , , orf19.9180 | IPF12617.3 | Contig20123:complement(18878..16827) , acetolactate synthase	ILV2		acetolactate synthase	orf19.9180	IPF12617.3	Contig20123:complement(18878..16827)
orf19.1614_803	964.75	0.008363	0.00832221	0.284433	0.008363	1.52626	1.52626	FLT up vs GRD	12.0858	7.04696	1.31616	1	orf19.1614_803	MEP1 , MEP1 , orf19.9181 | IPF12620.1 | Contig20123:complement(21293..19689) , low affinity high capacity ammonium permease	MEP1	MEP1	low affinity high capacity ammonium permease	orf19.9181	IPF12620.1	Contig20123:complement(21293..19689)
orf19.1616_2821	75.0625	0.213813	0.475425	0.362735	0.213813	1.79911	1.79911	FLT up vs GRD	1.82385	0.998712	0.931512	1	orf19.1616_2821	, , orf19.9183 | IPF12262.3 | Contig20123:complement(26527..23177) , hypothetical protein			hypothetical protein	orf19.9183	IPF12262.3	Contig20123:complement(26527..23177)
orf19.1617_181	260.063	0.0397374	0.893319	0.196891	0.0397374	2.44533	2.44533	FLT up vs GRD	6.01823	0.310527	1.9814	1	orf19.1617_181	, , orf19.9184 | IPF12263.2 | Contig20123:complement(28610..27438) , conserved hypothetical protein			conserved hypothetical protein	orf19.9184	IPF12263.2	Contig20123:complement(28610..27438)
orf19.1618_2053	6231.94	0.802708	0.175831	0.774453	0.802708	0.973293	-1.02744	FLT down vs GRD	0.0667107	2.04531	0.0878694	1	orf19.1618_2053	GFA1 , GFA1 , orf19.9186 | IPF17771.2 | Contig20123:30481..32622 , glucoseamine-6- phosphate synthase	GFA1	GFA1	glucoseamine-6- phosphate synthase	orf19.9186	IPF17771.2	Contig20123:30481..32622
orf19.1619_1601	3493.06	0.00921588	0.0492836	0.0215352	0.00921588	1.83691	1.83691	FLT up vs GRD	11.6317	3.70918	8.11282	1	orf19.1619_1601	CTK1 , , orf19.9187 | IPF25612.1 | Contig20123:35150..36910 , kinase of RNA polymerase II carboxy-terminal domain (CTD), alpha subunit	CTK1		kinase of RNA polymerase II carboxy-terminal domain (CTD), alpha subunit	orf19.9187	IPF25612.1	Contig20123:35150..36910
orf19.162_209	28.1875	0.386865	0.280444	0.155798	0.386865	0.372414	-2.68518	FLT down vs GRD	0.837501	1.53589	2.45483	1	orf19.162_209	, , , hypothetical protein			hypothetical protein
orf19.1620_61	39	0.672517	0.926975	0.110024	0.672517	0.739704	-1.35189	FLT down vs GRD	0.192418	0.252444	3.2299	1	orf19.1620_61	, , orf19.9188 | IPF25665.1 | Contig20123:37222..37587 , hypothetical protein			hypothetical protein	orf19.9188	IPF25665.1	Contig20123:37222..37587
orf19.1621_937	919.875	0.115599	0.671812	0.0348609	0.115599	0.730145	-1.36959	FLT down vs GRD	3.11451	0.647636	6.43753	1	orf19.1621_937	GPA2 , GPA2 , orf19.9189 | IPF25624.1 | Contig20123:39614..41122 , guanine nucleotide-binding regulatory protein	GPA2	GPA2	guanine nucleotide-binding regulatory protein	orf19.9189	IPF25624.1	Contig20123:39614..41122
orf19.1622_2751	124.625	0.735899	0.0426797	0.0907582	0.735899	0.873031	-1.14543	FLT down vs GRD	0.121993	3.92941	3.69619	1	orf19.1622_2751	YCG1 , , orf19.9190 | IPF25696.1 | Contig20123:41564..45343 , condensin G	YCG1		condensin G	orf19.9190	IPF25696.1	Contig20123:41564..45343
orf19.1623_867	4860.19	2.64e-05	0.0696456	0.0868997	2.64e-05	2.17665	2.17665	FLT up vs GRD	73.5442	3.20905	3.80519	1	orf19.1623_867	CAP1 , CAP1 , orf19.9191 | IPF4242.2 | Contig20123:complement(47081..45582) , transcriptional activator involved in oxidative stress response	CAP1	CAP1	transcriptional activator involved in oxidative stress response	orf19.9191	IPF4242.2	Contig20123:complement(47081..45582)
orf19.1624_2020	942.188	0.0116316	0.392	0.0264899	0.0116316	0.753579	-1.327	FLT down vs GRD	10.5884	1.19218	7.36628	1	orf19.1624_2020	MAK10 , , orf19.9192 | IPF17282.3 | Contig20123:48618..51026 , glucose-repressible protein	MAK10		glucose-repressible protein	orf19.9192	IPF17282.3	Contig20123:48618..51026
orf19.1625_287	2441	0.259696	0.116698	0.226058	0.259696	0.801041	-1.24838	FLT down vs GRD	1.47159	2.53194	1.72017	1	orf19.1625_287	, , orf19.9193 | IPF25669.1 | Contig20123:51532..51954 , oxidoreductase			oxidoreductase	orf19.9193	IPF25669.1	Contig20123:51532..51954
orf19.1626_1074	1090.19	0.884913	0.35669	0.6659	0.884913	1.0348	1.0348	FLT up vs GRD	0.0223293	1.28773	0.200881	1	orf19.1626_1074	DYS1 , , orf19.9194 | IPF25636.1 | Contig20123:52405..53544 , deoxyhypusine synthase	DYS1		deoxyhypusine synthase	orf19.9194	IPF25636.1	Contig20123:52405..53544
orf19.1628_881	1211.5	0.593543	0.0108284	0.0172579	0.593543	1.07185	1.07185	FLT up vs GRD	0.30892	6.45766	8.95736	1	orf19.1628_881	LAP4 , , orf19.9196 | IPF25621.1 | Contig20123:53867..55396 , vacuolar aminopeptidase	LAP4		vacuolar aminopeptidase	orf19.9196	IPF25621.1	Contig20123:53867..55396
orf19.163_4	886	0.0749637	0.294454	0.597454	0.0749637	1.58779	1.58779	FLT up vs GRD	4.18642	1.48494	0.302301	1	orf19.163_4	PAN6 , , orf19.7797 | IPF18979.2 | Contig20040:complement(677..3) , pantoate-beta- alanine ligase, pantothenic acid biosynthesis	PAN6		pantoate-beta- alanine ligase, pantothenic acid biosynthesis	orf19.7797	IPF18979.2	Contig20040:complement(677..3)
orf19.1630_1488	741.938	0.991197	0.339926	0.587935	0.991197	1.00291	1.00291	FLT up vs GRD	0.00012955	1.33681	0.318578	1	orf19.1630_1488	PSP2 , , orf19.9198 | IPF25601.1 | Contig20123:56543..58741 , suppressor of DNA polymerase and splicing mutations	PSP2		suppressor of DNA polymerase and splicing mutations	orf19.9198	IPF25601.1	Contig20123:56543..58741
orf19.1631_945	3079.63	0.00139402	0.0677889	0.518776	0.00139402	0.474927	-2.10559	FLT down vs GRD	22.8304	3.24671	0.455465	1	orf19.1631_945	ERG6 , ERG6 , orf19.9199 | IPF25638.1 | Contig20123:59684..60814 , S-adenosyl-methionine delta-24- sterol-c-methyltransferase	ERG6	ERG6	S-adenosyl-methionine delta-24- sterol-c-methyltransferase	orf19.9199	IPF25638.1	Contig20123:59684..60814
orf19.1632_333	2463.94	0.108708	0.0523512	0.530504	0.108708	0.739415	-1.35242	FLT down vs GRD	3.25825	3.61894	0.429759	1	orf19.1632_333	DCW2 , , orf19.9200 | IPF25634.1 | Contig20123:61435..62652 , GPI-anchored protein with cell wall role	DCW2		GPI-anchored protein with cell wall role	orf19.9200	IPF25634.1	Contig20123:61435..62652
orf19.1633_1407	26563.8	0.0851544	0.16628	0.844422	0.0851544	1.31248	1.31248	FLT up vs GRD	3.85657	2.10924	0.0410914	1	orf19.1633_1407	UTP4 , , orf19.9201 | IPF25598.1 | Contig20123:complement(64955..62724) , U3 snoRNP protein	UTP4		U3 snoRNP protein	orf19.9201	IPF25598.1	Contig20123:complement(64955..62724)
orf19.1634_44	275.063	0.25807	0.205801	0.157178	0.25807	0.688592	-1.45224	FLT down vs GRD	1.48254	1.8688	2.4363	1	orf19.1634_44	, , orf19.9202 | IPF25639.1 | Contig20123:complement(66453..65344) , conserved hypothetical protein			conserved hypothetical protein	orf19.9202	IPF25639.1	Contig20123:complement(66453..65344)
orf19.1635_382	16338.4	0.193357	0.0600274	0.0583189	0.193357	0.789572	-1.26651	FLT down vs GRD	2.01665	3.41909	4.87252	1	orf19.1635_382	RPL12 , , orf19.9203 | IPF25668.1 | Contig20123:complement(68052..67555) , large subunit ribosomal protein L12.e	RPL12		large subunit ribosomal protein L12.e	orf19.9203	IPF25668.1	Contig20123:complement(68052..67555)
orf19.1636_1231	911.875	0.366912	0.204236	0.325819	0.366912	1.10634	1.10634	FLT up vs GRD	0.914553	1.87724	1.09563	1	orf19.1636_1231	STE50 , , orf19.9204 | IPF25630.1 | Contig20123:complement(69762..68380) , pheromone response pathway protein	STE50		pheromone response pathway protein	orf19.9204	IPF25630.1	Contig20123:complement(69762..68380)
orf19.1637_727	1858	0.239754	0.366174	0.496213	0.239754	0.887019	-1.12737	FLT down vs GRD	1.61307	1.26108	0.508127	1	orf19.1637_727	, , orf19.9205 | IPF25641.1 | Contig20123:70895..71749 , conserved hypothetical protein			conserved hypothetical protein	orf19.9205	IPF25641.1	Contig20123:70895..71749
orf19.1638_1891	515.375	0.32498	0.0117156	0.789189	0.32498	0.856277	-1.16785	FLT down vs GRD	1.09968	6.28862	0.0764405	1	orf19.1638_1891	SEC29 , , orf19.9206 | IPF10446.3 | Contig20123:complement(74420..71835) , component of COPII coat of ER-golgi vesicles, GTPase activating protein	SEC29		component of COPII coat of ER-golgi vesicles, GTPase activating protein	orf19.9206	IPF10446.3	Contig20123:complement(74420..71835)
orf19.1639_834	63.9375	0.830838	0.202162	0.388237	0.830838	1.13519	1.13519	FLT up vs GRD	0.0487181	1.88855	0.832435	1	orf19.1639_834	, , orf19.9207 | IPF10444.2 | Contig20123:75196..76362 , dioxygenase			dioxygenase	orf19.9207	IPF10444.2	Contig20123:75196..76362
orf19.164_810	163	0.189959	0.593699	0.325667	0.189959	0.551795	-1.81227	FLT down vs GRD	2.05139	0.775347	1.09637	1	orf19.164_810	, , orf19.7798 | IPF14116.2 | Contig20040:1729..2934 , peroxisomal lipase			peroxisomal lipase	orf19.7798	IPF14116.2	Contig20040:1729..2934
orf19.1641_1046	69.875	0.203452	0.617259	0.0869327	0.203452	0.161211	-6.20305	FLT down vs GRD	1.91819	0.735585	3.80423	1	orf19.1641_1046	, , orf19.9208 | IPF19209.2 | Contig20123:complement(77683..76412) , formamidase			formamidase	orf19.9208	IPF19209.2	Contig20123:complement(77683..76412)
orf19.1642_363	1638.88	0.0977427	0.324409	0.102207	0.0977427	0.71673	-1.39522	FLT down vs GRD	3.5134	1.3847	3.40524	1	orf19.1642_363	LOC1 , , orf19.9209 | IPF25650.1 | Contig20123:78587..79207 , nuclear mRNA binding protein	LOC1		nuclear mRNA binding protein	orf19.9209	IPF25650.1	Contig20123:78587..79207
orf19.1643_897	2792.19	0.00990307	0.630175	0.0391237	0.00990307	0.732587	-1.36503	FLT down vs GRD	11.3027	0.714282	6.06731	1	orf19.1643_897	PCP1 , , orf19.9211 | IPF25663.1 | Contig20123:complement(80072..79701) , mitochondrial rhomboid protease	PCP1		mitochondrial rhomboid protease	orf19.9211	IPF25663.1	Contig20123:complement(80072..79701)
orf19.1646_1760	666.5	0.8293	0.622952	0.273435	0.8293	1.02982	1.02982	FLT up vs GRD	0.0496245	0.726155	1.38277	1	orf19.1646_1760	MRD1 , , orf19.9215 | IPF11615.2 | Contig20123:complement(82969..80432) , RNA binding protein essential for synthesis of the small ribosomal subunit	MRD1		RNA binding protein essential for synthesis of the small ribosomal subunit	orf19.9215	IPF11615.2	Contig20123:complement(82969..80432)
orf19.1647_588	166.563	0.62215	0.0683696	0.807921	0.62215	0.83012	-1.20464	FLT down vs GRD	0.262653	3.2348	0.0631492	1	orf19.1647_588	, , orf19.9216 | IPF25648.1 | Contig20123:83636..84310 , hypothetical protein			hypothetical protein	orf19.9216	IPF25648.1	Contig20123:83636..84310
orf19.1648_3848	803.375	0.946169	0.740626	0.400614	0.946169	0.979352	-1.02108	FLT down vs GRD	0.00485341	0.542473	0.787971	1	orf19.1648_3848	RAD50 , , orf19.9217 | IPF25689.1 | Contig20123:complement(88253..84330) , DNA repair protein	RAD50		DNA repair protein	orf19.9217	IPF25689.1	Contig20123:complement(88253..84330)
orf19.1649_825	4540.31	0.806675	0.650541	0.246875	0.806675	0.960654	-1.04096	FLT down vs GRD	0.0639907	0.681325	1.5607	1	orf19.1649_825	RNA1 , , orf19.9218 | IPF11621.2 | Contig20123:complement(89694..88450) , GTPase activating protein	RNA1		GTPase activating protein	orf19.9218	IPF11621.2	Contig20123:complement(89694..88450)
orf19.1650_97	9.6875	0.310217	0.238608	0.437393	0.310217	0.149915	-6.67043	FLT down vs GRD	1.17367	1.70751	0.668056	1	orf19.1650_97	TOM6 , , orf19.9219 | IPF15801.2 | Contig20123:89790..90095 , mitochondrial outer membrane import receptor subunit	TOM6		mitochondrial outer membrane import receptor subunit	orf19.9219	IPF15801.2	Contig20123:89790..90095
orf19.1651_249	163.313	0.499524	0.0618909	0.00750572	0.499524	1.27002	1.27002	FLT up vs GRD	0.500124	3.37529	12.6049	1	orf19.1651_249	, , orf19.9220 | IPF25661.1 | Contig20123:91613..92140 , hypothetical protein			hypothetical protein	orf19.9220	IPF25661.1	Contig20123:91613..92140
orf19.1652_1787	3011.81	0.311799	0.00107351	0.0146306	0.311799	0.900086	-1.111	FLT down vs GRD	1.16549	13.21	9.61985	1	orf19.1652_1787	POX1 , , orf19.9221 | IPF15088.2 | Contig20123:94215..96344 , fatty-acyl coenzyme A oxidase	POX1		fatty-acyl coenzyme A oxidase	orf19.9221	IPF15088.2	Contig20123:94215..96344
orf19.1653_216	2327.81	0.00620285	0.220894	0.843504	0.00620285	1.77778	1.77778	FLT up vs GRD	13.5558	1.7911	0.0415855	1	orf19.1653_216	, , orf19.9222 | IPF25655.1 | Contig20123:96792..97391 , hypothetical protein			hypothetical protein	orf19.9222	IPF25655.1	Contig20123:96792..97391
orf19.1654_355	3668.56	0.0602508	0.721263	0.857528	0.0602508	0.724442	-1.38037	FLT down vs GRD	4.78069	0.571604	0.0343739	1	orf19.1654_355	, , orf19.9223 | IPF25652.1 | Contig20123:97649..98317 , hypothetical protein			hypothetical protein	orf19.9223	IPF25652.1	Contig20123:97649..98317
orf19.1655.3	5010.88	0.17671	0.0530249	0.043283	0.17671	1.26449	1.26449	FLT up vs GRD	2.19531	3.59999	5.75244	1	orf19.1655.3	PMP3 , , orf19.9224.3 | IPF18656.2 | Contig20123:103074..103241 , plasma membrane protein involved in salt tolerance	PMP3		plasma membrane protein involved in salt tolerance	orf19.9224.3	IPF18656.2	Contig20123:103074..103241
orf19.1655_1754	211.625	0.278505	0.352269	0.343381	0.278505	0.433796	-2.30523	FLT down vs GRD	1.35159	1.30042	1.01421	1	orf19.1655_1754	POX3 , , orf19.9224 | IPF25599.1 | Contig20123:complement(100617..98443) , fatty-acyl coenzyme A oxidase	POX3		fatty-acyl coenzyme A oxidase	orf19.9224	IPF25599.1	Contig20123:complement(100617..98443)
orf19.1656_1354	697.875	0.0740513	0.540867	0.49718	0.0740513	0.489968	-2.04095	FLT down vs GRD	4.21876	0.869544	0.50578	1	orf19.1656_1354	, , orf19.9225 | IPF25614.1 | Contig20123:105684..107480 , conserved hypothetical protein			conserved hypothetical protein	orf19.9225	IPF25614.1	Contig20123:105684..107480
orf19.1658_1100	6573.75	0.863444	0.507751	0.467356	0.863444	0.960701	-1.04091	FLT down vs GRD	0.0315453	0.932911	0.582191	1	orf19.1658_1100	, , orf19.9227 | IPF19685.1 | Contig20123:110162..111199 , conserved hypothetical protein			conserved hypothetical protein	orf19.9227	IPF19685.1	Contig20123:110162..111199
orf19.1659_1259	599.063	0.0752144	0.00517275	0.867003	0.0752144	0.808939	-1.23619	FLT down vs GRD	4.17762	8.21315	0.0299041	1	orf19.1659_1259	ALG8 , , orf19.9228 | IPF25617.1 | Contig20123:complement(113347..111584) , glycosyl transferase	ALG8		glycosyl transferase	orf19.9228	IPF25617.1	Contig20123:complement(113347..111584)
orf19.166_1882	315.625	0.238504	0.152749	0.250021	0.238504	1.35218	1.35218	FLT up vs GRD	1.62249	2.20777	1.53824	1	orf19.166_1882	GIN1 , , orf19.7800 | IPF14113.2 | Contig20040:4610..7588 , transcriptional regulator	GIN1		transcriptional regulator	orf19.7800	IPF14113.2	Contig20040:4610..7588
orf19.1661_1284	1994.69	0.185145	0.221624	0.071513	0.185145	0.776427	-1.28795	FLT down vs GRD	2.10207	1.7875	4.31148	1	orf19.1661_1284	DBP5 , , orf19.9230 | IPF25616.1 | Contig20123:114035..115633 , RNA helicase involved in mRNA export	DBP5		RNA helicase involved in mRNA export	orf19.9230	IPF25616.1	Contig20123:114035..115633
orf19.1662_824	1278.88	0.408384	0.0378907	0.0185032	0.408384	1.13672	1.13672	FLT up vs GRD	0.761168	4.11732	8.6863	1	orf19.1662_824	MRP1 , , orf19.9231 | IPF25644.1 | Contig20123:complement(116864..116013) , mitochondrial ribosomal small subunit protein	MRP1		mitochondrial ribosomal small subunit protein	orf19.9231	IPF25644.1	Contig20123:complement(116864..116013)
orf19.1663_903	1441.06	0.0331892	0.158987	0.570443	0.0331892	0.587235	-1.7029	FLT down vs GRD	6.59876	2.1611	0.350009	1	orf19.1663_903	KRE2 , , orf19.9232 | IPF25631.1 | Contig20123:119257..120642 , alpha-1,2-mannosyltransferase	KRE2		alpha-1,2-mannosyltransferase	orf19.9232	IPF25631.1	Contig20123:119257..120642
orf19.1664_2448	602.5	0.0738126	0.0172208	0.851435	0.0738126	0.780869	-1.28062	FLT down vs GRD	4.2273	5.50707	0.0374194	1	orf19.1664_2448	, , orf19.9233 | IPF25593.1 | Contig20123:complement(123408..120808) , beta-glucosidase			beta-glucosidase	orf19.9233	IPF25593.1	Contig20123:complement(123408..120808)
orf19.1665_860	5263.44	0.00733377	0.0535694	0.721446	0.00733377	0.696746	-1.43524	FLT down vs GRD	12.718	3.5849	0.136426	1	orf19.1665_860	KTR1 , , orf19.9234 | IPF25633.1 | Contig20123:125540..126835 , alpha-1,2-mannosyltransferase involved in n-linked and o-linked glycosylation	KTR1		alpha-1,2-mannosyltransferase involved in n-linked and o-linked glycosylation	orf19.9234	IPF25633.1	Contig20123:125540..126835
orf19.1666_1090	761.063	0.545404	0.465239	0.565162	0.545404	1.16654	1.16654	FLT up vs GRD	0.398643	1.02037	0.359902	1	orf19.1666_1090	, , orf19.9235 | IPF25623.1 | Contig20123:129214..130809 , hypothetical protein			hypothetical protein	orf19.9235	IPF25623.1	Contig20123:129214..130809
orf19.1667.1	2383.88	0.965431	0.0860396	0.737934	0.965431	1.00531	1.00531	FLT up vs GRD	0.00199937	2.9223	0.120034	1	orf19.1667.1	, , orf19.9236.2 | IPF25704.1 | Contig20123:135383..135649 , conserved hypothetical protein			conserved hypothetical protein	orf19.9236.2	IPF25704.1	Contig20123:135383..135649
orf19.1667_3032	286.688	0.473511	0.231126	0.309798	0.473511	0.567485	-1.76216	FLT down vs GRD	0.56572	1.7419	1.17584	1	orf19.1667_3032	RAD15 , , orf19.9236 | IPF25699.1 | Contig20123:131418..135170 , DNA-dependent ATPase of the nucleotide excision repair factor 4 complex	RAD15		DNA-dependent ATPase of the nucleotide excision repair factor 4 complex	orf19.9236	IPF25699.1	Contig20123:131418..135170
orf19.1668_1680	405.125	0.308481	0.688327	0.729848	0.308481	0.76128	-1.31358	FLT down vs GRD	1.18271	0.621927	0.127922	1	orf19.1668_1680	, , orf19.9237 | IPF25608.1 | Contig20123:135872..137743 , hypothetical protein			hypothetical protein	orf19.9237	IPF25608.1	Contig20123:135872..137743
orf19.1669_1626	1648.56	0.25357	0.849279	0.329834	0.25357	1.25532	1.25532	FLT up vs GRD	1.51337	0.38002	1.07644	1	orf19.1669_1626	AFG3 , , orf19.9238 | IPF25597.1 | Contig20123:complement(140245..137912) , ATP dependent metalloprotease	AFG3		ATP dependent metalloprotease	orf19.9238	IPF25597.1	Contig20123:complement(140245..137912)
orf19.1670_2527	958.688	0.00423102	0.0474234	0.216108	0.00423102	0.441575	-2.26462	FLT down vs GRD	15.6091	3.76735	1.8038	1	orf19.1670_2527	BRO1 , , orf19.9239 | IPF25590.1 | Contig20123:141089..143926 , involved in integral membrane protein trafficking	BRO1		involved in integral membrane protein trafficking	orf19.9239	IPF25590.1	Contig20123:141089..143926
orf19.1671_1310	6209.56	0.727274	0.993714	0.51216	0.727274	1.09988	1.09988	FLT up vs GRD	0.130494	0.0791459	0.470458	1	orf19.1671_1310	UTR2 , , orf19.9240 | IPF8080.2 | Contig20123:148155..149567 , cell wall protein	UTR2		cell wall protein	orf19.9240	IPF8080.2	Contig20123:148155..149567
orf19.1672_3262	2867.81	0.000327239	0.0240942	0.55534	0.000327239	0.600161	-1.66622	FLT down vs GRD	35.8729	4.88284	0.378814	1	orf19.1672_3262	COP1 , , orf19.9241 | IPF8079.2 | Contig20123:150061..153726 , coatomer complex alpha chain of secretory pathway vesicles	COP1		coatomer complex alpha chain of secretory pathway vesicles	orf19.9241	IPF8079.2	Contig20123:150061..153726
orf19.1673_1275	526.75	0.0224989	0.52912	0.438906	0.0224989	1.73807	1.73807	FLT up vs GRD	7.95159	0.891596	0.663481	1	orf19.1673_1275	PPT1 , , orf19.9242 | IPF25613.1 | Contig20123:154314..156008 , serine/threonine protein phosphatase	PPT1		serine/threonine protein phosphatase	orf19.9242	IPF25613.1	Contig20123:154314..156008
orf19.1674_1557	590.75	0.398211	0.190825	0.0472664	0.398211	1.20007	1.20007	FLT up vs GRD	0.79643	1.95287	5.48506	1	orf19.1674_1557	CDC53 , , orf19.9243 | IPF25604.1 | Contig20123:complement(158566..156308) , ubiquitin ligase (cullin) of SCF involved in cell cycle control	CDC53		ubiquitin ligase (cullin) of SCF involved in cell cycle control	orf19.9243	IPF25604.1	Contig20123:complement(158566..156308)
orf19.1675_1130	1359.38	0.495633	0.894908	0.414975	0.495633	0.848838	-1.17808	FLT down vs GRD	0.509541	0.307914	0.739075	1	orf19.1675_1130	, , orf19.9244 | IPF14225.2 | Contig20123:complement(160653..159451) , conserved hypothetical protein			conserved hypothetical protein	orf19.9244	IPF14225.2	Contig20123:complement(160653..159451)
orf19.1676_675	1315.25	0.300752	0.211408	0.864641	0.300752	0.796257	-1.25588	FLT down vs GRD	1.2239	1.83917	0.0309882	1	orf19.1676_675	, , orf19.9244.3 | IPF12502.2 | Contig20123:162149..162424 | orf19.9245 | IPF12501.2 | Contig20123:162569..163261 , conserved hypothetical protein			conserved hypothetical protein	orf19.9244.3	IPF12502.2	Contig20123:162149..162424
orf19.1677_653	1772	0.00178629	0.409506	0.428862	0.00178629	0.589022	-1.69773	FLT down vs GRD	21.0377	1.14821	0.694354	1	orf19.1677_653	, , orf19.9246 | IPF25645.1 | Contig20123:complement(165435..164560) , hypothetical protein			hypothetical protein	orf19.9246	IPF25645.1	Contig20123:complement(165435..164560)
orf19.1678_286	738.875	0.0268646	0.364388	0.145072	0.0268646	0.729125	-1.37151	FLT down vs GRD	7.31711	1.26604	2.60677	1	orf19.1678_286	, , orf19.9247 | IPF not available | Contig20123:complement(165786..165436) , hypothetical protein			hypothetical protein	orf19.9247	IPF
orf19.1679_865	344.625	0.476835	0.205874	0.164296	0.476835	1.23848	1.23848	FLT up vs GRD	0.556981	1.86841	2.34405	1	orf19.1679_865	, , orf19.9248 | IPF12495.1 | Contig20123:166755..167333 , hypothetical protein			hypothetical protein	orf19.9248	IPF12495.1	Contig20123:166755..167333
orf19.168_603	694.813	0.00538116	0.00372758	0.0249583	0.00538116	0.644617	-1.55131	FLT down vs GRD	14.2953	9.1001	7.57683	1	orf19.168_603	MTR3 , , orf19.7801 | IPF14111.3 | Contig20040:7963..8844 , exosome exoribonuclease related to RNA processing and transport	MTR3		exosome exoribonuclease related to RNA processing and transport	orf19.7801	IPF14111.3	Contig20040:7963..8844
orf19.1680_1013	1528.44	0.901884	0.29485	0.909431	0.901884	0.974667	-1.02599	FLT down vs GRD	0.016192	1.48354	0.0137846	1	orf19.1680_1013	TFP1 , , orf19.9249 | IPF12493.1 | Contig20123:complement(169803..168085) , vacuolar ATPase V1 domain catalytic subunit A	TFP1		vacuolar ATPase V1 domain catalytic subunit A	orf19.9249	IPF12493.1	Contig20123:complement(169803..168085)
orf19.1681_389	1695.44	0.633551	0.742321	0.689006	0.633551	1.0657	1.0657	FLT up vs GRD	0.245548	0.539935	0.172275	1	orf19.1681_389	, , orf19.9250 | IPF25657.1 | Contig20123:complement(170959..170399) , conserved hypothetical protein			conserved hypothetical protein	orf19.9250	IPF25657.1	Contig20123:complement(170959..170399)
orf19.1682_673	2668.31	0.257922	0.0830703	0.528064	0.257922	0.767259	-1.30334	FLT down vs GRD	1.48354	2.969	0.435015	1	orf19.1682_673	, , orf19.9251 | IPF25637.1 | Contig20123:complement(172386..171226) , conserved hypothetical protein			conserved hypothetical protein	orf19.9251	IPF25637.1	Contig20123:complement(172386..171226)
orf19.1683_644	2098.31	0.0211583	0.392301	0.715616	0.0211583	0.694327	-1.44024	FLT down vs GRD	8.17839	1.19141	0.142511	1	orf19.1683_644	PPH22 , , orf19.9252 | IPF11679.2 | Contig20123:complement(174158..173076) , serine-threonine protein phosphatase 2A	PPH22		serine-threonine protein phosphatase 2A	orf19.9252	IPF11679.2	Contig20123:complement(174158..173076)
orf19.1684_318	52.1875	0.907002	0.407057	0.491666	0.907002	1.08393	1.08393	FLT up vs GRD	0.014538	1.15424	0.51928	1	orf19.1684_318	, , orf19.9253 | IPF11676.2 | Contig20123:complement(178214..175062) , hypothetical protein			hypothetical protein	orf19.9253	IPF11676.2	Contig20123:complement(178214..175062)
orf19.1685_859	21.4375	0.850511	0.589417	0.21227	0.850511	0.78642	-1.27158	FLT down vs GRD	0.0378931	0.782709	1.8375	1	orf19.1685_859	, , , hypothetical protein			hypothetical protein
orf19.1686_1637	354.313	0.27771	0.925467	0.319102	0.27771	0.720583	-1.38777	FLT down vs GRD	1.35643	0.2552	1.12853	1	orf19.1686_1637	MPA43 , , orf19.9254 | IPF25619.1 | Contig20123:complement(180569..178860) , conserved hypothetical protein	MPA43		conserved hypothetical protein	orf19.9254	IPF25619.1	Contig20123:complement(180569..178860)
orf19.1687_824	480.75	0.726905	0.723058	0.167222	0.726905	1.09197	1.09197	FLT up vs GRD	0.130866	0.568892	2.30765	1	orf19.1687_824	PRP43 , , orf19.9255 | IPF25600.1 | Contig20123:complement(183318..181015) , RNA helicase involved in spliceosome disassembly	PRP43		RNA helicase involved in spliceosome disassembly	orf19.9255	IPF25600.1	Contig20123:complement(183318..181015)
orf19.169_2179	851.688	0.034938	0.111401	0.442763	0.034938	0.557375	-1.79413	FLT down vs GRD	6.43033	2.58976	0.651939	1	orf19.169_2179	CHO2 , , orf19.7802 | IPF19595.2 | Contig20040:complement(11611..8945) , phosphatidyl- ethanolamine N-methyltransferase	CHO2		phosphatidyl- ethanolamine N-methyltransferase	orf19.7802	IPF19595.2	Contig20040:complement(11611..8945)
orf19.1690_865	1966.69	0.627202	0.772021	0.815878	0.627202	1.10461	1.10461	FLT up vs GRD	0.254982	0.495676	0.0579128	1	orf19.1690_865	TOS1 , , orf19.9258 | IPF25628.1 | Contig20123:187678..189084 , conserved hypothetical protein	TOS1		conserved hypothetical protein	orf19.9258	IPF25628.1	Contig20123:187678..189084
orf19.1691_123	13723.3	0.414687	8.58e-06	0.731239	0.414687	0.91716	-1.09032	FLT down vs GRD	0.740027	49.1542	0.126545	1	orf19.1691_123	, , orf19.9259 | IPF19200.1 | Contig20123:complement(190062..189547) , conserved hypothetical protein			conserved hypothetical protein	orf19.9259	IPF19200.1	Contig20123:complement(190062..189547)
orf19.1693_8297	1070.63	0.142569	0.0186784	0.436133	0.142569	0.773735	-1.29243	FLT down vs GRD	2.64439	5.35137	0.671887	1	orf19.1693_8297	TAO3 , , orf19.9261 | IPF25646.1 | Contig20123:193254..201746 , transcriptional activator	TAO3		transcriptional activator	orf19.9261	IPF25646.1	Contig20123:193254..201746
orf19.1697_858	2608.31	0.230104	0.919357	0.137177	0.230104	0.724191	-1.38085	FLT down vs GRD	1.68761	0.266186	2.72847	1	orf19.1697_858	, , orf19.9264 | IPF25640.1 | Contig20123:202016..203077 , conserved hypothetical protein			conserved hypothetical protein	orf19.9264	IPF25640.1	Contig20123:202016..203077
orf19.1698_1689	1178.31	0.192462	0.135119	0.280423	0.192462	0.821094	-1.21789	FLT down vs GRD	2.02572	2.35319	1.34001	1	orf19.1698_1689	APP1 , , orf19.9265 | IPF13217.2 | Contig20123:complement(205102..203204) , actin patch protein	APP1		actin patch protein	orf19.9265	IPF13217.2	Contig20123:complement(205102..203204)
orf19.1699_1798	1412.88	0.203463	0.40097	0.418273	0.203463	0.718324	-1.39213	FLT down vs GRD	1.91808	1.16939	0.728235	1	orf19.1699_1798	BZZ1 , , orf19.9266 | IPF25611.1 | Contig20123:205883..207745 , cortical patch protein involved in actin organization	BZZ1		cortical patch protein involved in actin organization	orf19.9266	IPF25611.1	Contig20123:205883..207745
orf19.17_479	615.688	0.958724	0.573312	0.830062	0.958724	0.98566	-1.01455	FLT down vs GRD	0.00285141	0.810803	0.0491747	1	orf19.17_479	SCP1 , , orf19.7688 | IPF3874.2 | Contig20014:complement(867..277) , putative calponin	SCP1		putative calponin	orf19.7688	IPF3874.2	Contig20014:complement(867..277)
orf19.1700_380	12541.2	0.00678419	0.00109304	0.583414	0.00678419	0.806376	-1.24012	FLT down vs GRD	13.1032	13.141	0.326509	1	orf19.1700_380	RPS7A , , orf19.9267 | IPF13662.1 | Contig20123:complement(208584..208024) , ribosomal protein S7A	RPS7A		ribosomal protein S7A	orf19.9267	IPF13662.1	Contig20123:complement(208584..208024)
orf19.1701_468	813.875	0.934312	0.109777	0.190381	0.934312	1.02664	1.02664	FLT up vs GRD	0.00723342	2.60817	2.04703	1	orf19.1701_468	RKI1 , , orf19.9268 | IPF13663.2 | Contig20123:209184..209975 , ribose-5-phosphate ketol-isomerase	RKI1		ribose-5-phosphate ketol-isomerase	orf19.9268	IPF13663.2	Contig20123:209184..209975
orf19.1702_421	2944.06	0.0483957	0.948336	0.228321	0.0483957	0.645249	-1.54979	FLT down vs GRD	5.41444	0.211009	1.70186	1	orf19.1702_421	ARF3 , , orf19.9269 | IPF25666.1 | Contig20123:complement(210697..210209) , GTP-binding ADP-ribosylation factor	ARF3		GTP-binding ADP-ribosylation factor	orf19.9269	IPF25666.1	Contig20123:complement(210697..210209)
orf19.1704_407	2441.31	0.0415762	0.0610001	0.882796	0.0415762	0.790457	-1.26509	FLT down vs GRD	5.87679	3.39602	0.0231654	1	orf19.1704_407	POT1 , , orf19.9271 | IPF17552.3 | Contig20123:213238..214470 , peroxisomal 3- oxoacyl CoA thiolase	POT1		peroxisomal 3- oxoacyl CoA thiolase	orf19.9271	IPF17552.3	Contig20123:213238..214470
orf19.1706_1241	221.5	0.485447	0.108915	0.116513	0.485447	0.806666	-1.23967	FLT down vs GRD	0.534836	2.61807	3.09629	1	orf19.1706_1241	MET18 , , orf19.9273 | IPF25707.1 | Contig20123:214904..218044 , TFIIH regulator	MET18		TFIIH regulator	orf19.9273	IPF25707.1	Contig20123:214904..218044
orf19.1707_126	1148.31	0.351141	0.210825	0.255924	0.351141	0.766476	-1.30467	FLT down vs GRD	0.98022	1.84221	1.49715	1	orf19.1707_126	, , orf19.9274 | IPF25708.1 | Contig20123:218060..218377 , hypothetical protein			hypothetical protein	orf19.9274	IPF25708.1	Contig20123:218060..218377
orf19.1708_438	701.75	0.00232614	0.0781949	0.433247	0.00232614	0.53313	-1.87571	FLT down vs GRD	19.2478	3.05029	0.680728	1	orf19.1708_438	, , orf19.9275 | IPF25649.1 | Contig20123:complement(219195..218536) , hypothetical protein of conserved synteny with related S. cerevisiae protein			hypothetical protein of conserved synteny with related S. cerevisiae protein	orf19.9275	IPF25649.1	Contig20123:complement(219195..218536)
orf19.1709_159	36.625	0.796415	0.440885	0.448971	0.796415	0.847015	-1.18062	FLT down vs GRD	0.0711507	1.07416	0.633715	1	orf19.1709_159	PXP18 , , orf19.9276 | IPF25694.1 | Contig20123:220841..221224 , sterol carrier protein	PXP18		sterol carrier protein	orf19.9276	IPF25694.1	Contig20123:220841..221224
orf19.171_1445	1311.25	0.00561429	0.268647	0.122404	0.00561429	2.17964	2.17964	FLT up vs GRD	14.0718	1.58111	2.98317	1	orf19.171_1445	DBP2 , , orf19.7804 | IPF27143.1 | Contig20040:complement(15725..14394) , DEAD box RNA helicase	DBP2		DEAD box RNA helicase	orf19.7804	IPF27143.1	Contig20040:complement(15725..14394)
orf19.1710_732	2164.5	0.000671651	0.0318616	0.124974	0.000671651	0.664593	-1.50468	FLT down vs GRD	28.8095	4.40061	2.93603	1	orf19.1710_732	ALI1 , , orf19.9277 | IPF25643.1 | Contig20123:222396..223235 , mitochondrial NADH-ubiquinone oxidoreductase	ALI1		mitochondrial NADH-ubiquinone oxidoreductase	orf19.9277	IPF25643.1	Contig20123:222396..223235
orf19.1711_686	1072.94	0.031684	0.12744	0.89393	0.031684	0.699199	-1.43021	FLT down vs GRD	6.753	2.42388	0.0189435	1	orf19.1711_686	END3 , , orf19.9278 | IPF25635.1 | Contig20123:complement(224503..223316) , required for cytoskeletal organization	END3		required for cytoskeletal organization	orf19.9278	IPF25635.1	Contig20123:complement(224503..223316)
orf19.1712_3123	1939.25	0.00139468	0.135471	0.888328	0.00139468	0.504228	-1.98323	FLT down vs GRD	22.8269	2.35006	0.0210133	1	orf19.1712_3123	GEA2 , , orf19.9279 | IPF25656.1 | Contig20123:225586..226182 | orf19.9280 | IPF25714.1 | Contig20123:226052..229129 , GDP/GTP exchange factor for ARF	GEA2		GDP/GTP exchange factor for ARF	orf19.9279	IPF25656.1	Contig20123:225586..226182
orf19.1714_155	31.375	0.949913	0.715742	0.17559	0.949913	1.07998	1.07998	FLT up vs GRD	0.00420077	0.579964	2.20815	1	orf19.1714_155	, , orf19.9281 | IPF25662.1 | Contig20123:230642..231190 , hypothetical protein			hypothetical protein	orf19.9281	IPF25662.1	Contig20123:230642..231190
orf19.1715_1603	663.813	0.295604	0.254902	0.279619	0.295604	1.49221	1.49221	FLT up vs GRD	1.2522	1.63679	1.34485	1	orf19.1715_1603	IRO1 , IRO1 , orf19.9283 | IPF11363.1 | Contig20123:232650..234440 , transcription factor	IRO1	IRO1	transcription factor	orf19.9283	IPF11363.1	Contig20123:232650..234440
orf19.1716_742	1167.81	0.0899296	0.135648	0.180655	0.0899296	0.765056	-1.30709	FLT down vs GRD	3.71908	2.34849	2.15097	1	orf19.1716_742	URA3 , , orf19.9284 | IPF25647.1 | Contig20123:234876..235688 , orotidine-5'-phosphate decarboxylase	URA3		orotidine-5'-phosphate decarboxylase	orf19.9284	IPF25647.1	Contig20123:234876..235688
orf19.1717_1262	194.375	0.82982	0.906118	0.357214	0.82982	1.05122	1.05122	FLT up vs GRD	0.0493173	0.289164	0.954403	1	orf19.1717_1262	, , orf19.9285 | IPF25627.1 | Contig20123:complement(237228..235843) , conserved hypothetical protein			conserved hypothetical protein	orf19.9285	IPF25627.1	Contig20123:complement(237228..235843)
orf19.1718_1131	309.875	0.194445	0.00658713	0.0625589	0.194445	1.2972	1.2972	FLT up vs GRD	2.00571	7.60331	4.6758	1	orf19.1718_1131	, , orf19.9286 | IPF25589.1 | Contig20123:complement(240662..237786) , hypothetical protein, contains cysteine quintet like STB5			hypothetical protein, contains cysteine quintet like STB5	orf19.9286	IPF25589.1	Contig20123:complement(240662..237786)
orf19.1719_1613	1114.69	0.0115236	0.953111	0.939452	0.0115236	0.385247	-2.59574	FLT down vs GRD	10.629	0.200938	0.00614318	1	orf19.1719_1613	SGA1 , , orf19.9287 | IPF25618.1 | Contig20123:243800..245536 , glucoamylase	SGA1		glucoamylase	orf19.9287	IPF25618.1	Contig20123:243800..245536
orf19.172_121	744	0.344436	0.0568244	0.135253	0.344436	0.793512	-1.26022	FLT down vs GRD	1.00952	3.49842	2.75955	1	orf19.172_121	RPC19 , , orf19.7805 | IPF27146.1 | Contig20040:complement(16822..16427) , RNA polymerase I and III subunit	RPC19		RNA polymerase I and III subunit	orf19.7805	IPF27146.1	Contig20040:complement(16822..16427)
orf19.1720_2331	497.563	0.267256	0.316582	0.754972	0.267256	0.635579	-1.57337	FLT down vs GRD	1.42191	1.40985	0.104333	1	orf19.1720_2331	, , orf19.9288 | IPF25592.1 | Contig20123:complement(248473..245879) , conserved hypothetical protein			conserved hypothetical protein	orf19.9288	IPF25592.1	Contig20123:complement(248473..245879)
orf19.1721_514	2062.75	0.0408294	0.163973	0.0553671	0.0408294	1.59432	1.59432	FLT up vs GRD	5.93326	2.12534	5.02062	1	orf19.1721_514	NCE103 , , orf19.9289 | IPF25642.1 | Contig20123:249419..250315 , conserved hypothetical protein	NCE103		conserved hypothetical protein	orf19.9289	IPF25642.1	Contig20123:249419..250315
orf19.1722_334	225.938	0.111993	0.00880073	0.404318	0.111993	1.58682	1.58682	FLT up vs GRD	3.18829	6.9186	0.775091	1	orf19.1722_334	, , orf19.9290 | IPF25679.1 | Contig20123:complement(250601..250158) , hypothetical protein			hypothetical protein	orf19.9290	IPF25679.1	Contig20123:complement(250601..250158)
orf19.1723_61	852.125	0.0133226	0.0290325	0.0205038	0.0133226	1.46696	1.46696	FLT up vs GRD	10.0083	4.55751	8.29582	1	orf19.1723_61	, , orf19.9291 | IPF25651.1 | Contig20123:complement(251421..250753) , conserved hypothetical protein			conserved hypothetical protein	orf19.9291	IPF25651.1	Contig20123:complement(251421..250753)
orf19.1724_336	26.5	0.61698	0.760734	0.146266	0.61698	0.678035	-1.47485	FLT down vs GRD	0.270653	0.512458	2.58913	1	orf19.1724_336	, , orf19.9292 | IPF25671.1 | Contig20123:complement(252111..251641) , hypothetical protein			hypothetical protein	orf19.9292	IPF25671.1	Contig20123:complement(252111..251641)
orf19.1725_1490	151.938	0.296938	0.861159	0.0150866	0.296938	1.41821	1.41821	FLT up vs GRD	1.24479	0.361721	9.49455	1	orf19.1725_1490	, , orf19.9293 | IPF8416.3 | Contig20123:254427..256490 , hypothetical protein, serine/threonine rich			hypothetical protein, serine/threonine rich	orf19.9293	IPF8416.3	Contig20123:254427..256490
orf19.1727_2921	894.375	0.00447986	0.0103624	0.449963	0.00447986	1.83763	1.83763	FLT up vs GRD	15.2896	6.5535	0.630843	1	orf19.1727_2921	PMC1 , , orf19.9295 | IPF25700.1 | Contig20123:complement(260930..257295) , Ca2+-transporting P-type ATPase	PMC1		Ca2+-transporting P-type ATPase	orf19.9295	IPF25700.1	Contig20123:complement(260930..257295)
orf19.1728_16	293.25	0.542567	0.00275232	0.215222	0.542567	0.877583	-1.13949	FLT down vs GRD	0.404438	9.9878	1.81151	1	orf19.1728_16	, , orf19.9296 | IPF25653.1 | Contig20123:264339..264971 , hypothetical protein			hypothetical protein	orf19.9296	IPF25653.1	Contig20123:264339..264971
orf19.1729_575	489.188	0.0907549	0.49841	0.565844	0.0907549	0.614869	-1.62636	FLT down vs GRD	3.69628	0.951495	0.358614	1	orf19.1729_575	, , orf19.9297 | IPF25625.1 | Contig20123:complement(266509..265007) , hypothetical protein			hypothetical protein	orf19.9297	IPF25625.1	Contig20123:complement(266509..265007)
orf19.173_2668	1728.38	0.0130703	0.000812532	0.0214703	0.0130703	1.2679	1.2679	FLT up vs GRD	10.0888	14.317	8.124	1	orf19.173_2668	AZF1 , , orf19.7807 | IPF12061.3 | Contig20040:complement(20698..18401) | orf19.7806 | IPF27145.1 | Contig20040:complement(18672..17395) , DNA-binding transcription factor	AZF1		DNA-binding transcription factor	orf19.7807	IPF12061.3	Contig20040:complement(20698..18401)
orf19.1730_427	817.5	0.121321	0.652397	0.403815	0.121321	0.67012	-1.49227	FLT down vs GRD	3.00341	0.678357	0.776829	1	orf19.1730_427	NHP10 , , orf19.9299 | IPF25677.1 | Contig20123:267855..268265 | orf19.9298 | IPF25664.1 | Contig20123:267371..267874 , non-histone protein 10	NHP10		non-histone protein 10	orf19.9299	IPF25677.1	Contig20123:267855..268265
orf19.1732_3338	889.063	0.917344	0.352744	0.0998136	0.917344	0.979573	-1.02085	FLT down vs GRD	0.0114712	1.29905	3.46244	1	orf19.1732_3338	UTP20 , , orf19.9301 | IPF25622.1 | Contig20123:complement(271942..270323) | orf19.9300 | IPF25609.1 | Contig20123:complement(270204..268342) , U3 snoRNP protein	UTP20		U3 snoRNP protein	orf19.9301	IPF25622.1	Contig20123:complement(271942..270323)
orf19.1734_3696	1184	0.00675928	0.216713	0.996384	0.00675928	0.524266	-1.90743	FLT down vs GRD	13.1216	1.81198	2.19e-05	1	orf19.1734_3696	INO80 , , orf19.9302 | IPF25587.1 | Contig20124:368..4531 , DNA ATP-dependent helicase similar to Snf2p	INO80		DNA ATP-dependent helicase similar to Snf2p	orf19.9302	IPF25587.1	Contig20124:368..4531
orf19.1735_89	1009.06	0.00100298	0.0250377	0.0626634	0.00100298	0.590906	-1.69232	FLT down vs GRD	25.3906	4.81461	4.67117	1	orf19.1735_89	, , orf19.9303 | IPF13577.2 | Contig20124:complement(5040..4636) , hypothetical protein			hypothetical protein	orf19.9303	IPF13577.2	Contig20124:complement(5040..4636)
orf19.1736_0	259.625	0.852248	0.433701	0.00263474	0.852248	0.959696	-1.042	FLT down vs GRD	0.037005	1.09061	18.444	1	orf19.1736_0	, , orf19.9304 | IPF13574.1 | Contig20124:6554..6889 , hypothetical protein			hypothetical protein	orf19.9304	IPF13574.1	Contig20124:6554..6889
orf19.1737_152	107.875	0.233328	0.627741	0.32463	0.233328	0.642396	-1.55667	FLT down vs GRD	1.66223	0.718272	1.10138	1	orf19.1737_152	, , , hypothetical protein			hypothetical protein
orf19.1738.1	2751.94	0.598255	0.0261064	0.750906	0.598255	0.944775	-1.05845	FLT down vs GRD	0.300958	4.74109	0.107968	1	orf19.1738.1	RBL2 , , orf19.9305.1 | IPF25583.1 | Contig20124:complement(10012..9725) , beta-tubulin binding protein and folding cofactor	RBL2		beta-tubulin binding protein and folding cofactor	orf19.9305.1	IPF25583.1	Contig20124:complement(10012..9725)
orf19.1738_789	3394.75	0.357339	0.0543013	0.77159	0.357339	1.11709	1.11709	FLT up vs GRD	0.95388	3.5649	0.0901913	1	orf19.1738_789	UGP1 , , orf19.9305 | IPF15411.2 | Contig20124:8131..9549 , UTP-glucose-1-phosphate uridylyltransferase	UGP1		UTP-glucose-1-phosphate uridylyltransferase	orf19.9305	IPF15411.2	Contig20124:8131..9549
orf19.1741_1330	151.938	0.371306	0.927029	0.9687	0.371306	0.585663	-1.70747	FLT down vs GRD	0.897027	0.252346	0.00163886	1	orf19.1741_1330	DIT1 , , orf19.9308 | IPF15414.2 | Contig20124:complement(11789..10263) , first enzyme in synthesis of dityrosine in the spore wall, converting L-tyrosine to N-formyl-L-tyrosine	DIT1		first enzyme in synthesis of dityrosine in the spore wall, converting L-tyrosine to N-formyl-L-tyrosine	orf19.9308	IPF15414.2	Contig20124:complement(11789..10263)
orf19.1742_746	656.813	0.474135	0.108441	0.38851	0.474135	0.706029	-1.41637	FLT down vs GRD	0.564072	2.62356	0.831429	1	orf19.1742_746	HEM3 , HEM3 , orf19.9309 | IPF25565.1 | Contig20125:233..1255 , phorphobilinogen deaminase (uroporphyrinogen synthase) | heme biosynthesis	HEM3	HEM3	phorphobilinogen deaminase (uroporphyrinogen synthase) | heme biosynthesis	orf19.9309	IPF25565.1	Contig20125:233..1255
orf19.1743_1743	2027.06	0.071328	0.0574619	0.147652	0.071328	0.781748	-1.27918	FLT down vs GRD	4.31841	3.4822	2.56889	1	orf19.1743_1743	ACS1 , ACS1 , orf19.9310 | IPF25554.1 | Contig20125:4418..6445 , acetyl-coenzyme A synthetase	ACS1	ACS1	acetyl-coenzyme A synthetase	orf19.9310	IPF25554.1	Contig20125:4418..6445
orf19.1744_726	1032.81	0.0167484	0.116427	0.0932553	0.0167484	2.03697	2.03697	FLT up vs GRD	9.07546	2.53481	3.6288	1	orf19.1744_726	HEM4 , HEM4 , orf19.9311 | IPF15006.2 | Contig20125:complement(7523..6708) , uroporphyrinogen III synthase | heme biosynthesis	HEM4	HEM4	uroporphyrinogen III synthase | heme biosynthesis	orf19.9311	IPF15006.2	Contig20125:complement(7523..6708)
orf19.1745_319	321.75	0.221039	0.381547	0.370542	0.221039	1.57244	1.57244	FLT up vs GRD	1.76171	1.21946	0.900051	1	orf19.1745_319	, , orf19.9312 | IPF16671.1 | Contig20125:8788..9237 , hypothetical protein			hypothetical protein	orf19.9312	IPF16671.1	Contig20125:8788..9237
orf19.1746_682	75.5625	0.205075	0.0697033	0.654874	0.205075	0.484059	-2.06587	FLT down vs GRD	1.90298	3.2079	0.215483	1	orf19.1746_682	SSP2 , , orf19.9313 | IPF16670.2 | Contig20125:9543..10868 , similar to sporulation-specific protein	SSP2		similar to sporulation-specific protein	orf19.9313	IPF16670.2	Contig20125:9543..10868
orf19.1747_1022	120	0.717963	0.585925	0.280925	0.717963	0.819097	-1.22086	FLT down vs GRD	0.140042	0.788746	1.33699	1	orf19.1747_1022	KIP2 , , orf19.9315 | IPF10752.2 | Contig20125:11249..13246 , kinasin-like protein	KIP2		kinasin-like protein	orf19.9315	IPF10752.2	Contig20125:11249..13246
orf19.1748_1452	108.375	0.782784	0.213705	0.707185	0.782784	1.13979	1.13979	FLT up vs GRD	0.0813015	1.8273	0.151584	1	orf19.1748_1452	, , orf19.9316 | IPF19639.1 | Contig20125:13817..15862 , hypothetical protein			hypothetical protein	orf19.9316	IPF19639.1	Contig20125:13817..15862
orf19.175_1113	255.875	0.204138	0.601176	0.610839	0.204138	0.647966	-1.54329	FLT down vs GRD	1.91174	0.762595	0.280361	1	orf19.175_1113	, , orf19.7808 | IPF27142.1 | Contig20040:complement(25194..23644) , hypothetical protein			hypothetical protein	orf19.7808	IPF27142.1	Contig20040:complement(25194..23644)
orf19.1750_317	4810.06	0.199476	0.103514	0.107242	0.199476	1.15135	1.15135	FLT up vs GRD	1.95615	2.68237	3.29038	1	orf19.1750_317	, , orf19.9319 | IPF25570.1 | Contig20125:complement(16618..15983) , hypothetical protein			hypothetical protein	orf19.9319	IPF25570.1	Contig20125:complement(16618..15983)
orf19.1751_2109	3377.94	0.269583	0.0259637	0.0249833	0.269583	0.888002	-1.12612	FLT down vs GRD	1.40702	4.75069	7.57326	1	orf19.1751_2109	SPT23 , , orf19.9320 | IPF25551.1 | Contig20125:19396..21627 , hypothetical membrane protein	SPT23		hypothetical membrane protein	orf19.9320	IPF25551.1	Contig20125:19396..21627
orf19.1753_2138	996.75	0.97883	0.731846	0.320465	0.97883	1.00503	1.00503	FLT up vs GRD	0.000749446	0.555649	1.12178	1	orf19.1753_2138	PUS7 , , orf19.9322 | IPF16061.2 | Contig20125:complement(24153..21910) , pseudouridine synthase	PUS7		pseudouridine synthase	orf19.9322	IPF16061.2	Contig20125:complement(24153..21910)
orf19.1754_1217	703	0.0968231	0.673017	0.478417	0.0968231	0.62817	-1.59193	FLT down vs GRD	3.53648	0.645747	0.55286	1	orf19.1754_1217	CMK2 , CMK2 , orf19.9323 | IPF16060.2 | Contig20125:24848..26281 , Ca2+/calmodulin-dependent ser/thr protein kinase	CMK2	CMK2	Ca2+/calmodulin-dependent ser/thr protein kinase	orf19.9323	IPF16060.2	Contig20125:24848..26281
orf19.1755_2465	876.25	0.997085	0.881678	0.927242	0.997085	1.00121	1.00121	FLT up vs GRD	1.42e-05	0.329403	0.00887979	1	orf19.1755_2465	SET2 , SET2 , orf19.9324 | IPF25548.1 | Contig20125:26850..29384 , transcriptional repressor containing a SET domain	SET2	SET2	transcriptional repressor containing a SET domain	orf19.9324	IPF25548.1	Contig20125:26850..29384
orf19.1756_537	1722.19	0.384254	0.0190013	0.751551	0.384254	0.897657	-1.11401	FLT down vs GRD	0.847224	5.31891	0.107387	1	orf19.1756_537	GPD2 , , orf19.9325 | IPF25561.1 | Contig20125:complement(30862..29651) , glycerol-3-phosphate dehydrogenase	GPD2		glycerol-3-phosphate dehydrogenase	orf19.9325	IPF25561.1	Contig20125:complement(30862..29651)
orf19.1757_1134	1287.25	0.174784	0.0513352	0.507024	0.174784	1.22592	1.22592	FLT up vs GRD	2.21745	3.64809	0.482351	1	orf19.1757_1134	, , orf19.9326 | IPF25560.1 | Contig20125:complement(35775..34024) , transcriptional regulator containing a C2H2 zinc finger			transcriptional regulator containing a C2H2 zinc finger	orf19.9326	IPF25560.1	Contig20125:complement(35775..34024)
orf19.1759_1301	1123	0.282402	0.537847	0.247156	0.282402	0.800748	-1.24883	FLT down vs GRD	1.32817	0.875171	1.55868	1	orf19.1759_1301	PHO23 , , orf19.9328 | IPF6854.2 | Contig20125:38104..39549 , transcriptional regulator	PHO23		transcriptional regulator	orf19.9328	IPF6854.2	Contig20125:38104..39549
orf19.176_507	300.75	0.0855542	0.5589	0.755165	0.0855542	2.33957	2.33957	FLT up vs GRD	3.84468	0.836524	0.104162	1	orf19.176_507	, , orf19.7809 | IPF27144.1 | Contig20040:complement(26805..25651) , oligopeptide transporter			oligopeptide transporter	orf19.7809	IPF27144.1	Contig20040:complement(26805..25651)
orf19.1760_283	737.75	0.187053	0.90891	0.188028	0.187053	0.648963	-1.54092	FLT down vs GRD	2.08176	0.284401	2.0715	1	orf19.1760_283	RAS1 , RAS1 , orf19.9329 | IPF25567.1 | Contig20125:41086..41961 , small monomeric GTPase involved in hyphae differentiation and the transmission of cAMP signals	RAS1	RAS1	small monomeric GTPase involved in hyphae differentiation and the transmission of cAMP signals	orf19.9329	IPF25567.1	Contig20125:41086..41961
orf19.1761_264	2026.94	2.92e-05	0.0273452	0.0211414	2.92e-05	0.432581	-2.31171	FLT down vs GRD	71.5124	4.6604	8.18137	1	orf19.1761_264	OST2 , , orf19.9330 | IPF25572.1 | Contig20125:complement(42861..42346) , oligosaccharyltransferase epsilon subunit	OST2		oligosaccharyltransferase epsilon subunit	orf19.9330	IPF25572.1	Contig20125:complement(42861..42346)
orf19.1762_660	1679.38	0.00157618	0.294227	0.239253	0.00157618	0.577039	-1.73298	FLT down vs GRD	21.9285	1.48574	1.61683	1	orf19.1762_660	, , orf19.9331 | IPF25568.1 | Contig20125:43207..44016 , protein tyrosine/serine phosphatase			protein tyrosine/serine phosphatase	orf19.9331	IPF25568.1	Contig20125:43207..44016
orf19.1763_305	480.438	0.000808212	0.00739291	0.477503	0.000808212	2.60543	2.60543	FLT up vs GRD	27.1886	7.32471	0.555238	1	orf19.1763_305	IFR1 , , orf19.9332 | IPF17558.3 | Contig20125:complement(45319..44207) , putative reductase/dehydrogenase	IFR1		putative reductase/dehydrogenase	orf19.9332	IPF17558.3	Contig20125:complement(45319..44207)
orf19.1764_384	2119.06	0.28161	0.0476155	0.888481	0.28161	1.17359	1.17359	FLT up vs GRD	1.3329	3.76122	0.0209555	1	orf19.1764_384	, , orf19.9333 | IPF16551.2 | Contig20125:47251..48093 , hypothetical protein			hypothetical protein	orf19.9333	IPF16551.2	Contig20125:47251..48093
orf19.1765_923	364.938	0.222609	0.369194	0.302761	0.222609	1.40475	1.40475	FLT up vs GRD	1.74857	1.25276	1.21304	1	orf19.1765_923	IFO2 , , orf19.9334 | IPF19560.1 | Contig20125:complement(49845..48589) , conserved hypothetical protein	IFO2		conserved hypothetical protein	orf19.9334	IPF19560.1	Contig20125:complement(49845..48589)
orf19.1766_989	103.938	0.277151	0.725001	0.462935	0.277151	6.78458	6.78458	FLT up vs GRD	1.35984	0.565959	0.594256	1	orf19.1766_989	IFO3 , , orf19.9335 | IPF25563.1 | Contig20125:complement(54159..52936) , similar to putative hydrolase	IFO3		similar to putative hydrolase	orf19.9335	IPF25563.1	Contig20125:complement(54159..52936)
orf19.1767_1763	813.688	0.773833	0.324854	0.127633	0.773833	0.901578	-1.10917	FLT down vs GRD	0.0883692	1.3833	2.88858	1	orf19.1767_1763	UBP8 , , orf19.9336 | IPF25557.1 | Contig20125:complement(57382..55541) , ubiquitin carboxyl-terminal hydrolase	UBP8		ubiquitin carboxyl-terminal hydrolase	orf19.9336	IPF25557.1	Contig20125:complement(57382..55541)
orf19.1768_2935	845.625	0.0952706	0.00290587	0.431388	0.0952706	1.15246	1.15246	FLT up vs GRD	3.5761	9.82398	0.686478	1	orf19.1768_2935	, , orf19.9336.1 | IPF25564.1 | Contig20125:complement(59507..58404) | orf19.9337 | IPF25556.1 | Contig20125:complement(61538..59508) , conserved hypothetical protein			conserved hypothetical protein	orf19.9336.1	IPF25564.1	Contig20125:complement(59507..58404)
orf19.1769_2	1029.38	0.629606	0.575233	0.371454	0.629606	0.926112	-1.07978	FLT down vs GRD	0.251384	0.807418	0.896443	1	orf19.1769_2	PLP2 , , orf19.9338 | IPF17476.2 | Contig20125:complement(62792..61995) , phosducin-like protein | GTPase inhibitor	PLP2		phosducin-like protein | GTPase inhibitor	orf19.9338	IPF17476.2	Contig20125:complement(62792..61995)
orf19.177_1321	238.5	0.104443	0.43431	0.0827708	0.104443	1.30281	1.30281	FLT up vs GRD	3.35334	1.08921	3.92898	1	orf19.177_1321	BEM12 , , orf19.7810 | IPF27140.1 | Contig20041:11010..12872 , binds multiple proteins involved in cell polarity establishment	BEM12		binds multiple proteins involved in cell polarity establishment	orf19.7810	IPF27140.1	Contig20041:11010..12872
orf19.1770_139	7567.31	0.133273	0.0205507	0.543045	0.133273	1.14613	1.14613	FLT up vs GRD	2.79214	5.17218	0.403457	1	orf19.1770_139	CYC1 , CYC1 , orf19.9339 | IPF25577.1 | Contig20125:complement(63859..63527) , cytochrome-c isoform 1	CYC1	CYC1	cytochrome-c isoform 1	orf19.9339	IPF25577.1	Contig20125:complement(63859..63527)
orf19.1771_1817	401	0.837175	0.378841	0.383668	0.837175	1.05962	1.05962	FLT up vs GRD	0.0450757	1.22665	0.84942	1	orf19.1771_1817	CWC22 , , orf19.9340 | IPF16269.2 | Contig20125:complement(66914..64974) , cell cycle control protein	CWC22		cell cycle control protein	orf19.9340	IPF16269.2	Contig20125:complement(66914..64974)
orf19.1772_2021	322.063	0.82433	0.335793	0.233137	0.82433	1.08962	1.08962	FLT up vs GRD	0.0526147	1.34933	1.66372	1	orf19.1772_2021	, , orf19.9341 | IPF25546.1 | Contig20125:67084..70038 , conserved hypothetical protein			conserved hypothetical protein	orf19.9341	IPF25546.1	Contig20125:67084..70038
orf19.1773_833	642.938	0.660504	0.619558	0.0634194	0.660504	1.10506	1.10506	FLT up vs GRD	0.207949	0.73177	4.63796	1	orf19.1773_833	RAP1 , , orf19.9342 | IPF9036.2 | Contig20125:complement(71642..70350) , DNA-binding protein	RAP1		DNA-binding protein	orf19.9342	IPF9036.2	Contig20125:complement(71642..70350)
orf19.1774_120	308.563	0.98633	0.283027	0.455892	0.98633	1.00636	1.00636	FLT up vs GRD	0.000312464	1.52628	0.613899	1	orf19.1774_120	FDH2 , , , formate dehydrogenase	FDH2		formate dehydrogenase
orf19.1776_174	292.438	0.320686	0.0727602	0.838542	0.320686	1.20069	1.20069	FLT up vs GRD	1.12068	3.14857	0.0443093	1	orf19.1776_174	, , orf19.9343 | IPF25566.1 | Contig20125:75263..76231 , pantotheine-phosphate adenylyltransferase			pantotheine-phosphate adenylyltransferase	orf19.9343	IPF25566.1	Contig20125:75263..76231
orf19.1777_3650	2869.5	0.220651	0.158106	0.644127	0.220651	0.839801	-1.19076	FLT down vs GRD	1.76497	2.16756	0.230329	1	orf19.1777_3650	UBP15 , , orf19.9344 | IPF25575.1 | Contig20125:complement(80602..76385) , ubiquitin-specific protease	UBP15		ubiquitin-specific protease	orf19.9344	IPF25575.1	Contig20125:complement(80602..76385)
orf19.1778_41	66.5	0.66878	0.231225	0.916072	0.66878	1.23695	1.23695	FLT up vs GRD	0.19717	1.74143	0.0118284	1	orf19.1778_41	, , , hypothetical protein			hypothetical protein
orf19.1779_7	13720.3	0.159137	0.0114865	0.529281	0.159137	1.20757	1.20757	FLT up vs GRD	2.41036	6.3307	0.432389	1	orf19.1779_7	SCW10 , , orf19.9345 | IPF15898.1 | Contig20125:83941..85077 , soluble cell wall protein similar to mannoprotein MP65	SCW10		soluble cell wall protein similar to mannoprotein MP65	orf19.9345	IPF15898.1	Contig20125:83941..85077
orf19.178_901	1479.75	0.0887578	0.300426	0.146408	0.0887578	0.756759	-1.32142	FLT down vs GRD	3.75193	1.46406	2.58704	1	orf19.178_901	, , , hypothetical protein			hypothetical protein
orf19.1780_9	18.5625	0.0604153	0.196965	0.830559	0.0604153	0.0436301	-22.92	FLT down vs GRD	4.77305	1.91749	0.048882	1	orf19.1780_9	IFO1 , , orf19.9346 | IPF25562.1 | Contig20125:86710..87954 , conserved hypothetical protein	IFO1		conserved hypothetical protein	orf19.9346	IPF25562.1	Contig20125:86710..87954
orf19.1782_581	3783.06	0.00407077	0.125476	0.481873	0.00407077	0.510311	-1.95959	FLT down vs GRD	15.8277	2.44279	0.543943	1	orf19.1782_581	, , orf19.9348 | IPF16210.3 | Contig20125:88322..89041 , conserved hypothetical protein			conserved hypothetical protein	orf19.9348	IPF16210.3	Contig20125:88322..89041
orf19.1783_2891	474.625	0.0446842	0.999543	0.29942	0.0446842	1.74792	1.74792	FLT up vs GRD	5.65493	0.0261504	1.23115	1	orf19.1783_2891	YOR1 , , orf19.9349 | IPF16207.2 | Contig20125:91229..93379 | orf19.9350 | IPF25550.1 | Contig20125:93389..95695 , oligomycin resistance ATP-dependent permease | ABC transporter	YOR1		oligomycin resistance ATP-dependent permease | ABC transporter	orf19.9349	IPF16207.2	Contig20125:91229..93379
orf19.1785_729	3638	0.0373149	0.0122837	0.959636	0.0373149	1.49423	1.49423	FLT up vs GRD	6.21782	6.18854	0.00272668	1	orf19.1785_729	, , orf19.9351 | IPF13018.3 | Contig20125:complement(96969..95989) , hypothetical protein			hypothetical protein	orf19.9351	IPF13018.3	Contig20125:complement(96969..95989)
orf19.1788_1622	2185.19	0.354472	0.0574364	0.244353	0.354472	1.19373	1.19373	FLT up vs GRD	0.965976	3.48284	1.57901	1	orf19.1788_1622	XKS1 , , orf19.9354.1 | IPF25535.1 | Contig20126:3262..3402 | orf19.9354 | IPF25530.1 | Contig20126:1551..3296 , xylulokinase	XKS1		xylulokinase	orf19.9354.1	IPF25535.1	Contig20126:3262..3402
orf19.1789.1	2387.13	0.0169744	0.350454	0.666411	0.0169744	0.514858	-1.94228	FLT down vs GRD	9.02251	1.30568	0.200219	1	orf19.1789.1	LYS1 , , orf19.9355.2 | IPF25528.1 | Contig20126:6798..6992 | orf19.9355.1 | IPF25539.1 | Contig20126:5845..6891 , saccharopine dehydrogenase	LYS1		saccharopine dehydrogenase	orf19.9355.2	IPF25528.1	Contig20126:6798..6992
orf19.1789_426	278.188	0.866062	0.107132	0.112016	0.866062	1.03954	1.03954	FLT up vs GRD	0.0303335	2.63886	3.18781	1	orf19.1789_426	, , orf19.9355 | IPF25532.1 | Contig20126:3687..5150 , conserved hypothetical protein			conserved hypothetical protein	orf19.9355	IPF25532.1	Contig20126:3687..5150
orf19.179_555	311.313	0.588781	0.0557935	0.0299915	0.588781	0.885743	-1.129	FLT down vs GRD	0.317107	3.52513	6.93794	1	orf19.179_555	, , , conserved hypothetical protein			conserved hypothetical protein
orf19.1791_579	624.375	0.297391	0.103143	0.302705	0.297391	0.820431	-1.21887	FLT down vs GRD	1.24229	2.68694	1.21334	1	orf19.1791_579	MAK11 , , orf19.9357 | IPF25533.1 | Contig20126:complement(8596..7121) , involved in cell growth and viral replication	MAK11		involved in cell growth and viral replication	orf19.9357	IPF25533.1	Contig20126:complement(8596..7121)
orf19.1792_2203	315.75	0.33461	0.454249	0.910557	0.33461	0.674523	-1.48253	FLT down vs GRD	1.05407	1.04428	0.0134423	1	orf19.1792_2203	CDC16 , , orf19.9358 | IPF25526.1 | Contig20126:8974..11193 , subunit of anaphase-promoting complex (cyclosome)	CDC16		subunit of anaphase-promoting complex (cyclosome)	orf19.9358	IPF25526.1	Contig20126:8974..11193
orf19.1793_1551	15545.6	0.165531	0.0350288	0.015934	0.165531	1.14208	1.14208	FLT up vs GRD	2.32858	4.24425	9.27395	1	orf19.1793_1551	, , orf19.9359 | IPF25531.1 | Contig20126:14021..15808 , conserved hypothetical protein			conserved hypothetical protein	orf19.9359	IPF25531.1	Contig20126:14021..15808
orf19.1794_60	303.688	0.508721	0.0969817	0.30222	0.508721	0.679424	-1.47183	FLT down vs GRD	0.478397	2.76584	1.21596	1	orf19.1794_60	, , orf19.9360 | IPF25538.1 | Contig20126:complement(17090..16008) , hypothetical protein			hypothetical protein	orf19.9360	IPF25538.1	Contig20126:complement(17090..16008)
orf19.1795_2515	1232.25	0.950614	0.110161	0.957997	0.950614	1.00655	1.00655	FLT up vs GRD	0.00408382	2.60379	0.00295279	1	orf19.1795_2515	PUF3 , , orf19.9361 | IPF25523.1 | Contig20126:17921..20731 , RNA-binding regulator of mRNA degradation	PUF3		RNA-binding regulator of mRNA degradation	orf19.9361	IPF25523.1	Contig20126:17921..20731
orf19.1796_754	1417.75	0.00211635	0.0435988	0.326171	0.00211635	0.512475	-1.95131	FLT down vs GRD	19.8748	3.89632	1.09393	1	orf19.1796_754	, , orf19.9362 | IPF25537.1 | Contig20126:21743..22837 , similar to glycerate dehydrogenases			similar to glycerate dehydrogenases	orf19.9362	IPF25537.1	Contig20126:21743..22837
orf19.1797_497	1779.38	0.00111442	0.0195112	0.0469711	0.00111442	0.489832	-2.04152	FLT down vs GRD	24.5481	5.26903	5.50388	1	orf19.1797_497	, , orf19.9363 | IPF25536.1 | Contig20126:complement(24364..23177) , conserved hypothetical protein			conserved hypothetical protein	orf19.9363	IPF25536.1	Contig20126:complement(24364..23177)
orf19.1798_4227	63.9375	0.660576	0.817315	0.436423	0.660576	1.21781	1.21781	FLT up vs GRD	0.207854	0.428302	0.671003	1	orf19.1798_4227	, , orf19.9364 | IPF7393.2 | Contig20126:complement(30759..26284) , conserved hypothetical protein			conserved hypothetical protein	orf19.9364	IPF7393.2	Contig20126:complement(30759..26284)
orf19.1799_1558	1224.25	0.170441	0.268926	0.217747	0.170441	0.791943	-1.26272	FLT down vs GRD	2.2686	1.58002	1.78966	1	orf19.1799_1558	GAP6 , , orf19.9365 | IPF19643.2 | Contig20126:complement(32895..31039) , general amino acid permease	GAP6		general amino acid permease	orf19.9365	IPF19643.2	Contig20126:complement(32895..31039)
orf19.18_1263	4767.94	0.98721	0.350493	0.111945	0.98721	1.00715	1.00715	FLT up vs GRD	0.000273515	1.30557	3.18929	1	orf19.18_1263	IMD3 , , orf19.7689 | IPF3873.2 | Contig20014:complement(2207..1092) | orf19.7690 | IPF27224.1 | Contig20014:complement(2904..2440) , inosine-5'- monophosphate dehydrogenase | guanosine nucleotide biosynthesis	IMD3		inosine-5'- monophosphate dehydrogenase | guanosine nucleotide biosynthesis	orf19.7689	IPF3873.2	Contig20014:complement(2207..1092)
orf19.180_232	13.25	0.961277	0.368188	0.704027	0.961277	1.09048	1.09048	FLT up vs GRD	0.00250919	1.25552	0.155067	1	orf19.180_232	, , , hypothetical protein			hypothetical protein
orf19.1800_749	1729.69	0.143929	0.0611047	0.304252	0.143929	1.22865	1.22865	FLT up vs GRD	2.62383	3.39357	1.20505	1	orf19.1800_749	VPS62 , , orf19.9366 | IPF25534.1 | Contig20126:complement(34771..33443) , involved in vacuolar targeting	VPS62		involved in vacuolar targeting	orf19.9366	IPF25534.1	Contig20126:complement(34771..33443)
orf19.1801_84	1267.5	0.579972	0.237065	0.688004	0.579972	0.900738	-1.1102	FLT down vs GRD	0.332638	1.7145	0.17346	1	orf19.1801_84	CBR1 , , orf19.9367 | IPF25540.1 | Contig20126:complement(36614..35730) , cytochrome-b5 reductase	CBR1		cytochrome-b5 reductase	orf19.9367	IPF25540.1	Contig20126:complement(36614..35730)
orf19.1802_1743	868.5	0.102595	0.707534	0.641853	0.102595	1.5738	1.5738	FLT up vs GRD	3.39612	0.592446	0.233549	1	orf19.1802_1743	, , orf19.9368 | IPF25529.1 | Contig20126:complement(39280..37430) , conserved hypothetical protein			conserved hypothetical protein	orf19.9368	IPF25529.1	Contig20126:complement(39280..37430)
orf19.1803_829	770.438	0.555049	0.0125138	0.426321	0.555049	0.746977	-1.33873	FLT down vs GRD	0.379382	6.14963	0.702357	1	orf19.1803_829	CDC43 , , orf19.9369 | IPF14866.2 | Contig20127:1864..3057 , geranylgeranyltransferase beta subunit	CDC43		geranylgeranyltransferase beta subunit	orf19.9369	IPF14866.2	Contig20127:1864..3057
orf19.1804_973	1176.81	0.589126	0.172337	0.990199	0.589126	0.822498	-1.21581	FLT down vs GRD	0.31651	2.0682	0.000160608	1	orf19.1804_973	, , orf19.9370 | IPF18938.1 | Contig20127:3537..4640 , putative mitochondrial transporter			putative mitochondrial transporter	orf19.9370	IPF18938.1	Contig20127:3537..4640
orf19.1805_965	2557.31	0.397739	0.181571	0.75495	0.397739	0.879611	-1.13687	FLT down vs GRD	0.798102	2.00885	0.104352	1	orf19.1805_965	PEX14 , , orf19.9371 | IPF15186.2 | Contig20127:5110..6384 , peroxisomal protein involved in import of peroxisomal matrix proteins	PEX14		peroxisomal protein involved in import of peroxisomal matrix proteins	orf19.9371	IPF15186.2	Contig20127:5110..6384
orf19.1806_981	1194.31	0.252417	0.0536786	0.919009	0.252417	1.14802	1.14802	FLT up vs GRD	1.5214	3.58189	0.0110118	1	orf19.1806_981	, , orf19.9373 | IPF15183.2 | Contig20127:7703..8779 , hypothetical protein			hypothetical protein	orf19.9373	IPF15183.2	Contig20127:7703..8779
orf19.1808_750	137.813	0.961469	0.903021	0.814966	0.961469	0.980269	-1.02013	FLT down vs GRD	0.00248443	0.294402	0.0585005	1	orf19.1808_750	, , orf19.9375 | IPF25517.1 | Contig20127:9628..10713 , hypothetical protein			hypothetical protein	orf19.9375	IPF25517.1	Contig20127:9628..10713
orf19.1809_2213	1826.56	0.162281	0.0406578	0.164158	0.162281	0.656188	-1.52395	FLT down vs GRD	2.36961	4.0054	2.34577	1	orf19.1809_2213	FOX2 , , , peroxisomal trifunctional hydratase-dehydrogenase-epimerase, beta-oxidation protein	FOX2		peroxisomal trifunctional hydratase-dehydrogenase-epimerase, beta-oxidation protein
orf19.181_287	188.5	0.0946701	0.1231	0.273131	0.0946701	0.541548	-1.84656	FLT down vs GRD	3.59165	2.46616	1.38467	1	orf19.181_287	, , orf19.7811 | IPF27136.1 | Contig20044:complement(480..1) , conserved hypothetical protein			conserved hypothetical protein	orf19.7811	IPF27136.1	Contig20044:complement(480..1)
orf19.1812_258	1212.75	0.201268	0.0438359	0.754666	0.201268	1.39819	1.39819	FLT up vs GRD	1.93892	3.88793	0.104604	1	orf19.1812_258	MIH1 , , , tyrosine phosphatase	MIH1		tyrosine phosphatase
orf19.1813_2338	2322.69	0.840261	0.628039	0.359293	0.840261	0.963185	-1.03822	FLT down vs GRD	0.0433551	0.717782	0.945719	1	orf19.1813_2338	, , orf19.9376 | IPF25512.1 | Contig20129:complement(3107..672) , conserved hypothetical protein			conserved hypothetical protein	orf19.9376	IPF25512.1	Contig20129:complement(3107..672)
orf19.1814_5625	3319.44	0.0301458	0.101602	0.346867	0.0301458	0.820777	-1.21836	FLT down vs GRD	6.92053	2.70613	0.998798	1	orf19.1814_5625	STT4 , , orf19.9377 | IPF14337.3 | Contig20129:complement(10996..5213) , phosphatidylinositol-4- kinase involved in protein kinase C pathway	STT4		phosphatidylinositol-4- kinase involved in protein kinase C pathway	orf19.9377	IPF14337.3	Contig20129:complement(10996..5213)
orf19.1815_514	9789.06	1.49e-05	0.200387	0.0966957	1.49e-05	2.46153	2.46153	FLT up vs GRD	85.9744	1.89833	3.5397	1	orf19.1815_514	TIF6 , , orf19.9378 | IPF12555.2 | Contig20129:complement(12323..11586) , translation initiation factor 6 (eIF6)	TIF6		translation initiation factor 6 (eIF6)	orf19.9378	IPF12555.2	Contig20129:complement(12323..11586)
orf19.1816_511	47.25	0.949864	0.555448	0.422347	0.949864	1.05829	1.05829	FLT up vs GRD	0.00420898	0.84277	0.715033	1	orf19.1816_511	ALS3 , ALS3 , orf19.9379 | IPF25511.1 | Contig20129:15283..17928 , agglutinin-like protein 3	ALS3	ALS3	agglutinin-like protein 3	orf19.9379	IPF25511.1	Contig20129:15283..17928
orf19.1817_351	26.9375	0.949945	0.854509	0.31023	0.949945	0.953644	-1.04861	FLT down vs GRD	0.0041954	0.371994	1.1736	1	orf19.1817_351	, , , hypothetical protein			hypothetical protein
orf19.1818_1096	23.1875	0.690481	0.288526	0.205117	0.690481	0.431736	-2.31623	FLT down vs GRD	0.170538	1.50615	1.90259	1	orf19.1818_1096	, , , hypothetical protein			hypothetical protein
orf19.182_1033	1107.06	0.325235	0.249151	0.746206	0.325235	1.20067	1.20067	FLT up vs GRD	1.09845	1.66113	0.112256	1	orf19.182_1033	PET56 , , orf19.7812 | IPF27133.1 | Contig20044:complement(2587..1397) | orf19.7811.2 | IPF27131.1 | Contig20044:complement(1421..1179) , mitochondrial rRNA (guanine-N1-)-methyltransferase	PET56		mitochondrial rRNA (guanine-N1-)-methyltransferase	orf19.7812	IPF27133.1	Contig20044:complement(2587..1397)
orf19.1821_217	38.75	0.619545	0.917499	0.789272	0.619545	1.52735	1.52735	FLT up vs GRD	0.266664	0.269475	0.0763783	1	orf19.1821_217	, , orf19.9380 | IPF25509.1 | Contig20131:1036..1356 , hypothetical protein			hypothetical protein	orf19.9380	IPF25509.1	Contig20131:1036..1356
orf19.1822_2197	194.313	0.0428674	0.0493506	0.296122	0.0428674	0.554015	-1.80501	FLT down vs GRD	5.78214	3.70714	1.24932	1	orf19.1822_2197	UME6 , , orf19.9381 | IPF15273.2 | Contig20131:8846..11368 , transcriptional regulator of early meiotic genes	UME6		transcriptional regulator of early meiotic genes	orf19.9381	IPF15273.2	Contig20131:8846..11368
orf19.1823_2624	400.813	0.762166	0.152124	0.930733	0.762166	0.965153	-1.0361	FLT down vs GRD	0.098071	2.21257	0.00804547	1	orf19.1823_2624	, , orf19.9382 | IPF25493.1 | Contig20131:complement(15166..12263) , highly conserved hypothetical protein			highly conserved hypothetical protein	orf19.9382	IPF25493.1	Contig20131:complement(15166..12263)
orf19.1824_411	86.5	0.704224	0.666195	0.0528649	0.704224	0.815122	-1.22681	FLT down vs GRD	0.154848	0.656465	5.1543	1	orf19.1824_411	, , orf19.9383 | IPF25501.1 | Contig20131:complement(16317..15388) , hypothetical protein			hypothetical protein	orf19.9383	IPF25501.1	Contig20131:complement(16317..15388)
orf19.1825_2152	606.75	0.959343	0.125413	0.484548	0.959343	1.01595	1.01595	FLT up vs GRD	0.00276633	2.4434	0.537115	1	orf19.1825_2152	, , orf19.9384 | IPF25495.1 | Contig20131:complement(19849..17345) , hypothetical protein			hypothetical protein	orf19.9384	IPF25495.1	Contig20131:complement(19849..17345)
orf19.1826_1396	2728.38	0.137407	0.000122571	0.276246	0.137407	0.821581	-1.21717	FLT down vs GRD	2.7248	24.2584	1.36538	1	orf19.1826_1396	MDM34 , , orf19.9385 | IPF25496.1 | Contig20131:23251..25119 , mitochondrial outer membrane protein involved in mitochondrial shape	MDM34		mitochondrial outer membrane protein involved in mitochondrial shape	orf19.9385	IPF25496.1	Contig20131:23251..25119
orf19.1827_1287	19.25	0.325931	0.338773	0.543793	0.325931	4.06115	4.06115	FLT up vs GRD	1.09509	1.34028	0.401926	1	orf19.1827_1287	, , orf19.9386 | IPF25499.1 | Contig20131:26056..27414 , hypothetical protein			hypothetical protein	orf19.9386	IPF25499.1	Contig20131:26056..27414
orf19.1828_778	390.938	0.706679	0.459528	0.450847	0.706679	1.12556	1.12556	FLT up vs GRD	0.15214	1.03272	0.628293	1	orf19.1828_778	BUD16 , , orf19.9387 | IPF25500.1 | Contig20131:complement(28606..27557) , involved in bud site selection	BUD16		involved in bud site selection	orf19.9387	IPF25500.1	Contig20131:complement(28606..27557)
orf19.1829_173	549.25	0.352366	0.320396	0.117931	0.352366	0.737889	-1.35522	FLT down vs GRD	0.974956	1.39751	3.06837	1	orf19.1829_173	, , orf19.9388 | IPF25503.1 | Contig20131:complement(29463..29209) , hypothetical protein			hypothetical protein	orf19.9388	IPF25503.1	Contig20131:complement(29463..29209)
orf19.183_177	445.125	0.012756	0.190107	0.390749	0.012756	2.02072	2.02072	FLT up vs GRD	10.1918	1.9571	0.823229	1	orf19.183_177	HIS3 , , orf19.7813 | IPF13420.2 | Contig20044:complement(3553..2885) , imidazoleglycerol-phosphate dehydratase	HIS3		imidazoleglycerol-phosphate dehydratase	orf19.7813	IPF13420.2	Contig20044:complement(3553..2885)
orf19.1830_133	574.75	0.120566	0.0530653	0.52578	0.120566	1.65078	1.65078	FLT up vs GRD	3.01769	3.59887	0.439981	1	orf19.1830_133	, , orf19.9389 | IPF25491.1 | Contig20132:complement(1049..717) , hypothetical protein			hypothetical protein	orf19.9389	IPF25491.1	Contig20132:complement(1049..717)
orf19.1831_319	79.8125	0.706314	0.568537	0.966522	0.706314	1.30114	1.30114	FLT up vs GRD	0.15254	0.819262	0.00187507	1	orf19.1831_319	, , , hypothetical protein			hypothetical protein
orf19.1832_1243	1253.31	0.0891407	0.0306079	0.971204	0.0891407	1.21163	1.21163	FLT up vs GRD	3.74114	4.46792	0.00138706	1	orf19.1832_1243	TPN1 , , orf19.9390 | IPF10337.1 | Contig20132:6910..8703 , putative pyridoxine transporter	TPN1		putative pyridoxine transporter	orf19.9390	IPF10337.1	Contig20132:6910..8703
orf19.1833_586	3150.88	0.101563	0.0383393	0.703263	0.101563	1.1848	1.1848	FLT up vs GRD	3.42045	4.0985	0.155916	1	orf19.1833_586	CBF5 , , orf19.9391 | IPF25486.1 | Contig20132:9569..11008 , nucleolar pseuduridine synthase and putative microtubule binding protein	CBF5		nucleolar pseuduridine synthase and putative microtubule binding protein	orf19.9391	IPF25486.1	Contig20132:9569..11008
orf19.1834_1958	349.938	0.0283966	0.00418026	0.00958592	0.0283966	0.657122	-1.52179	FLT down vs GRD	7.12473	8.78163	11.4509	1	orf19.1834_1958	NUP189 , , orf19.9392 | IPF25484.1 | Contig20132:complement(13904..11172) , nuclear pore complex subunit	NUP189		nuclear pore complex subunit	orf19.9392	IPF25484.1	Contig20132:complement(13904..11172)
orf19.1835_1600	627.313	0.802427	0.970216	0.890751	0.802427	0.942267	-1.06127	FLT down vs GRD	0.0669061	0.160865	0.0201046	1	orf19.1835_1600	PEA2 , , orf19.9393 | IPF25485.1 | Contig20132:complement(16221..14317) , required for some forms of polarized growth, localized to sites of polarized growth	PEA2		required for some forms of polarized growth, localized to sites of polarized growth	orf19.9393	IPF25485.1	Contig20132:complement(16221..14317)
orf19.1836_531	134.375	0.620222	0.503609	0.131463	0.620222	0.813892	-1.22866	FLT down vs GRD	0.265618	0.941111	2.82249	1	orf19.1836_531	APN2 , , orf19.9394 | IPF25487.1 | Contig20132:18044..19399 , AP endonuclease	APN2		AP endonuclease	orf19.9394	IPF25487.1	Contig20132:18044..19399
orf19.1837_351	5956	0.00563966	0.857031	0.0279461	0.00563966	1.6729	1.6729	FLT up vs GRD	14.0481	0.368108	7.17991	1	orf19.1837_351	SPT15 , , orf19.9395 | IPF25489.1 | Contig20132:19629..20345 , TATA- binding protein TBP	SPT15		TATA- binding protein TBP	orf19.9395	IPF25489.1	Contig20132:19629..20345
orf19.1839_4896	2485.75	0.480262	0.0811802	0.128878	0.480262	0.895536	-1.11665	FLT down vs GRD	0.548085	2.9998	2.86681	1	orf19.1839_4896	RPA190 , , orf19.9397 | IPF25490.1 | Contig20132:complement(26312..21315) , alpha subunit of RNA polymerase I	RPA190		alpha subunit of RNA polymerase I	orf19.9397	IPF25490.1	Contig20132:complement(26312..21315)
orf19.184_783	159.5	0.116186	0.282095	0.598163	0.116186	0.63884	-1.56534	FLT down vs GRD	3.10278	1.52974	0.301111	1	orf19.184_783	MDM10 , , orf19.7814 | IPF13419.2 | Contig20044:3993..5414 , mitochondrial outer membrane protein	MDM10		mitochondrial outer membrane protein	orf19.7814	IPF13419.2	Contig20044:3993..5414
orf19.1840_655	2949.88	0.0414443	0.415797	0.0779543	0.0414443	0.801928	-1.24699	FLT down vs GRD	5.88667	1.13289	4.08388	1	orf19.1840_655	, , orf19.9398 | IPF25488.1 | Contig20132:complement(27744..26725) , conserved hypothetical protein			conserved hypothetical protein	orf19.9398	IPF25488.1	Contig20132:complement(27744..26725)
orf19.1841_897	175.688	0.430811	0.00362423	0.750765	0.430811	0.821457	-1.21735	FLT down vs GRD	0.688271	9.17961	0.108095	1	orf19.1841_897	, , orf19.9399 | IPF17745.2 | Contig20133:complement(1436..312) , hypothetical protein			hypothetical protein	orf19.9399	IPF17745.2	Contig20133:complement(1436..312)
orf19.1842_3585	309.875	0.522375	0.363941	0.286019	0.522375	0.812898	-1.23017	FLT down vs GRD	0.447458	1.26729	1.30686	1	orf19.1842_3585	BUD5 , , orf19.9400 | IPF18345.2 | Contig20133:complement(4568..1788) , GDP/GTP exchange factor for Rsr1p/Bud1p	BUD5		GDP/GTP exchange factor for Rsr1p/Bud1p	orf19.9400	IPF18345.2	Contig20133:complement(4568..1788)
orf19.1843_412	276.75	0.196574	0.473639	0.169163	0.196574	0.63905	-1.56482	FLT down vs GRD	1.98453	1.00248	2.28398	1	orf19.1843_412	ALG6 , , orf19.9402 | IPF25471.1 | Contig20133:8780..10471 , glucosyltransferase required for N-linked glycosylation pathway	ALG6		glucosyltransferase required for N-linked glycosylation pathway	orf19.9402	IPF25471.1	Contig20133:8780..10471
orf19.1844_2029	160.938	0.373188	0.110903	0.0947348	0.373188	1.46467	1.46467	FLT up vs GRD	0.889623	2.59537	3.58997	1	orf19.1844_2029	FRE4 , , orf19.9403 | IPF4664.2 | Contig20133:13272..15401 , ferric reductase	FRE4		ferric reductase	orf19.9403	IPF4664.2	Contig20133:13272..15401
orf19.1847_1685	1874.75	0.109521	0.260917	0.103978	0.109521	1.43656	1.43656	FLT up vs GRD	3.24068	1.61201	3.36401	1	orf19.1847_1685	ARO10 , , orf19.9405 | IPF4667.1 | Contig20133:16477..18366 , pyruvate decarboxylase	ARO10		pyruvate decarboxylase	orf19.9405	IPF4667.1	Contig20133:16477..18366
orf19.1848.1	1881.38	0.0594775	0.702822	0.00547503	0.0594775	0.729528	-1.37075	FLT down vs GRD	4.81699	0.59964	14.2038	1	orf19.1848.1	, , orf19.9406.1 | IPF25467.1 | Contig20133:18765..18857 , conserved hypothetical protein, closest to human and mouse proteins			conserved hypothetical protein, closest to human and mouse proteins	orf19.9406.1	IPF25467.1	Contig20133:18765..18857
orf19.1849_2072	668.875	0.00908034	0.549196	0.0416208	0.00908034	0.508989	-1.96468	FLT down vs GRD	11.7003	0.854172	5.87345	1	orf19.1849_2072	, , orf19.9407 | IPF25468.1 | Contig20133:complement(21080..18927) , conserved hypothetical protein			conserved hypothetical protein	orf19.9407	IPF25468.1	Contig20133:complement(21080..18927)
orf19.185_957	1454.69	0.0931255	0.457437	0.764062	0.0931255	0.82815	-1.20751	FLT down vs GRD	3.63225	1.03728	0.0964564	1	orf19.185_957	MRP51 , , orf19.7816 | IPF13418.1 | Contig20044:5660..6775 , mitochondrial ribosome small subunit component	MRP51		mitochondrial ribosome small subunit component	orf19.7816	IPF13418.1	Contig20044:5660..6775
orf19.1850_116	274.875	0.754141	0.0355653	0.792795	0.754141	1.09075	1.09075	FLT up vs GRD	0.105069	4.2195	0.0737749	1	orf19.1850_116	SIW14 , , orf19.9408 | IPF25472.1 | Contig20133:21357..22490 , tyrosine phosphatase	SIW14		tyrosine phosphatase	orf19.9408	IPF25472.1	Contig20133:21357..22490
orf19.1852_434	1203.69	0.32074	0.466946	0.456361	0.32074	0.673358	-1.48509	FLT down vs GRD	1.12042	1.01671	0.612574	1	orf19.1852_434	, , orf19.9410 | IPF25475.1 | Contig20133:complement(23117..22593) , conserved hypothetical protein			conserved hypothetical protein	orf19.9410	IPF25475.1	Contig20133:complement(23117..22593)
orf19.1853_126	23918.7	0.000163224	0.0495168	0.731355	0.000163224	1.65747	1.65747	FLT up vs GRD	44.0315	3.70208	0.126431	1	orf19.1853_126	HHT2 , , orf19.9411 | IPF25478.1 | Contig20133:complement(23735..23325) , histone H3	HHT2		histone H3	orf19.9411	IPF25478.1	Contig20133:complement(23735..23325)
orf19.1854_67	14096.8	0.151325	0.120556	0.435047	0.151325	1.23136	1.23136	FLT up vs GRD	2.51644	2.49179	0.675203	1	orf19.1854_67	HHF2 , , orf19.9412 | IPF25481.1 | Contig20133:24693..25010 , histone H4	HHF2		histone H4	orf19.9412	IPF25481.1	Contig20133:24693..25010
orf19.1855_163	395	0.991623	0.00124402	0.492197	0.991623	0.997207	-1.0028	FLT down vs GRD	0.000117316	12.6544	0.517967	1	orf19.1855_163	SEO2 , , orf19.9413 | IPF25469.1 | Contig20133:26774..28588 , putative permease	SEO2		putative permease	orf19.9413	IPF25469.1	Contig20133:26774..28588
orf19.1856_407	565.75	0.557683	0.0949905	0.150634	0.557683	1.20103	1.20103	FLT up vs GRD	0.374239	2.79266	2.52619	1	orf19.1856_407	SDS3 , , orf19.9414 | IPF25473.1 | Contig20133:complement(30393..29362) , histone deacetylase and transcriptional regulator	SDS3		histone deacetylase and transcriptional regulator	orf19.9414	IPF25473.1	Contig20133:complement(30393..29362)
orf19.1857_344	526.313	0.361491	0.65108	0.0601689	0.361491	1.25048	1.25048	FLT up vs GRD	0.936623	0.680462	4.78451	1	orf19.1857_344	SPT11 , , orf19.9415 | IPF25474.1 | Contig20133:31407..32087 , histone acetyltransferase and transcription regulatory protein	SPT11		histone acetyltransferase and transcription regulatory protein	orf19.9415	IPF25474.1	Contig20133:31407..32087
orf19.1859_14	58.8125	0.579314	0.0327019	0.083837	0.579314	1.38606	1.38606	FLT up vs GRD	0.333818	4.35731	3.89626	1	orf19.1859_14	, , , hypothetical protein			hypothetical protein
orf19.1860_1008	872.938	0.154594	0.183247	0.429876	0.154594	0.575052	-1.73897	FLT down vs GRD	2.47119	1.99846	0.691183	1	orf19.1860_1008	, , orf19.9415.1 | IPF25466.1 | Contig20133:33382..33648 | orf19.9416 | IPF25436.1 | Contig20135:28..1359 , hypothetical protein			hypothetical protein	orf19.9415.1	IPF25466.1	Contig20133:33382..33648
orf19.1861_65	791.313	0.00290622	0.376224	0.424551	0.00290622	2.32137	2.32137	FLT up vs GRD	17.8288	1.23366	0.707979	1	orf19.1861_65	, , orf19.9417 | IPF25427.1 | Contig20135:complement(3335..1461) , SH3 domains protein			SH3 domains protein	orf19.9417	IPF25427.1	Contig20135:complement(3335..1461)
orf19.1862_301	25675.8	0.134247	0.0397113	0.6791	0.134247	0.759853	-1.31604	FLT down vs GRD	2.77602	4.04259	0.184216	1	orf19.1862_301	, , orf19.9418 | IPF18208.2 | Contig20135:4715..5080 , conserved hypothetical protein			conserved hypothetical protein	orf19.9418	IPF18208.2	Contig20135:4715..5080
orf19.1863_123	92.875	0.253281	0.785045	0.057133	0.253281	1.63607	1.63607	FLT up vs GRD	1.51538	0.476336	4.93085	1	orf19.1863_123	, , orf19.9419 | IPF4064.2 | Contig20135:complement(6966..5179) , hypothetical protein			hypothetical protein	orf19.9419	IPF4064.2	Contig20135:complement(6966..5179)
orf19.1864_2083	945.188	0.521872	0.84514	0.257243	0.521872	0.849535	-1.17711	FLT down vs GRD	0.448571	0.38634	1.48815	1	orf19.1864_2083	, , orf19.9420 | IPF4062.2 | Contig20135:7277..9436 , conserved protein with homology to a basic helix-loop-helix transcription factor			conserved protein with homology to a basic helix-loop-helix transcription factor	orf19.9420	IPF4062.2	Contig20135:7277..9436
orf19.1865_1707	1436	0.345592	0.0461972	0.00369018	0.345592	0.856834	-1.16709	FLT down vs GRD	1.00441	3.80726	16.3931	1	orf19.1865_1707	MSC7 , , orf19.9421 | IPF25426.1 | Contig20135:9975..11735 , aldehyde dehydrogenase	MSC7		aldehyde dehydrogenase	orf19.9421	IPF25426.1	Contig20135:9975..11735
orf19.1866_248	3845.44	0.0184048	0.0249102	0.0277929	0.0184048	0.655295	-1.52603	FLT down vs GRD	8.70687	4.82364	7.19894	1	orf19.1866_248	VMA10 , , orf19.9422 | IPF25457.1 | Contig20135:complement(12405..12064) , vacuolar ATPase V1 domain subunit G	VMA10		vacuolar ATPase V1 domain subunit G	orf19.9422	IPF25457.1	Contig20135:complement(12405..12064)
orf19.1867_739	285.25	0.00070798	0.0121102	0.119967	0.00070798	2.58417	2.58417	FLT up vs GRD	28.3405	6.21848	3.02908	1	orf19.1867_739	, , orf19.9423 | IPF25437.1 | Contig20135:complement(13961..12693) , permease of major facilitator superfamily			permease of major facilitator superfamily	orf19.9423	IPF25437.1	Contig20135:complement(13961..12693)
orf19.1868_242	1354.25	0.0328562	0.00724325	0.69086	0.0328562	1.52403	1.52403	FLT up vs GRD	6.63211	7.37351	0.170093	1	orf19.1868_242	RNR3 , , orf19.9424 | IPF25438.1 | Contig20135:complement(15561..14377) , small subunit of ribonucleotide reductase	RNR3		small subunit of ribonucleotide reductase	orf19.9424	IPF25438.1	Contig20135:complement(15561..14377)
orf19.187_501	558.375	0.43342	0.340297	0.388519	0.43342	0.793686	-1.25994	FLT down vs GRD	0.680196	1.33569	0.831397	1	orf19.187_501	, , orf19.7818 | IPF13416.3 | Contig20044:complement(9302..6885) , conserved hypothetical protein			conserved hypothetical protein	orf19.7818	IPF13416.3	Contig20044:complement(9302..6885)
orf19.1871_4146	582.938	0.199266	0.00773475	0.643624	0.199266	1.14024	1.14024	FLT up vs GRD	1.95819	7.21772	0.231039	1	orf19.1871_4146	SWR1 , , orf19.9427 | IPF4050.2 | Contig20135:complement(21791..16866) , snf family helicase	SWR1		snf family helicase	orf19.9427	IPF4050.2	Contig20135:complement(21791..16866)
orf19.1872_80	2920.25	0.0147579	0.241003	0.0153632	0.0147579	0.646341	-1.54717	FLT down vs GRD	9.58438	1.69677	9.42088	1	orf19.1872_80	, , orf19.9428 | IPF4045.1 | Contig20135:complement(22934..22335) , conserved hypothetical protein			conserved hypothetical protein	orf19.9428	IPF4045.1	Contig20135:complement(22934..22335)
orf19.1873_214	2861.94	0.0797248	0.372849	0.0637332	0.0797248	0.712196	-1.40411	FLT down vs GRD	4.02554	1.24278	4.62432	1	orf19.1873_214	, , orf19.9429 | IPF4044.1 | Contig20135:complement(23814..23482) , hypothetical protein			hypothetical protein	orf19.9429	IPF4044.1	Contig20135:complement(23814..23482)
orf19.1874_1037	9.5	0.840582	0.644764	0.61278	0.840582	0.754556	-1.32528	FLT down vs GRD	0.0431782	0.690599	0.277268	1	orf19.1874_1037	MEK1 , , orf19.9430 | IPF4042.2 | Contig20135:24891..25148 | orf19.9431 | IPF25446.1 | Contig20135:25129..25866 , serine/threonine protein kinase	MEK1		serine/threonine protein kinase	orf19.9430	IPF4042.2	Contig20135:24891..25148
orf19.1876_986	425.063	0.845048	0.656661	0.253295	0.845048	0.971604	-1.02923	FLT down vs GRD	0.0407562	0.67156	1.51528	1	orf19.1876_986	NAM8 , , orf19.9432 | IPF25435.1 | Contig20135:25997..27355 , RNA-binding protein	NAM8		RNA-binding protein	orf19.9432	IPF25435.1	Contig20135:25997..27355
orf19.1877_521	175.375	0.35029	0.00528177	0.330874	0.35029	0.810066	-1.23447	FLT down vs GRD	0.983889	8.15909	1.07153	1	orf19.1877_521	, , orf19.9433 | IPF25445.1 | Contig20135:complement(28167..27352) , conserved hypothetical protein			conserved hypothetical protein	orf19.9433	IPF25445.1	Contig20135:complement(28167..27352)
orf19.1878_817	626.313	0.213441	0.00750692	0.0982445	0.213441	0.79067	-1.26475	FLT down vs GRD	1.82713	7.28835	3.50092	1	orf19.1878_817	MED4 , , orf19.9434 | IPF25443.1 | Contig20135:28419..29390 , transcription mediator	MED4		transcription mediator	orf19.9434	IPF25443.1	Contig20135:28419..29390
orf19.188_1076	2089.06	0.610496	0.929545	0.661614	0.610496	1.09293	1.09293	FLT up vs GRD	0.28091	0.247707	0.206483	1	orf19.188_1076	, , orf19.7818 | IPF13416.3 | Contig20044:complement(9302..6885) , conserved hypothetical protein			conserved hypothetical protein	orf19.7818	IPF13416.3	Contig20044:complement(9302..6885)
orf19.1880_1070	4417.94	0.801726	0.248043	0.099031	0.801726	0.937109	-1.06711	FLT down vs GRD	0.0673938	1.6659	3.48153	1	orf19.1880_1070	HEM15 , , orf19.9436 | IPF25439.1 | Contig20135:complement(30543..29485) , ferrochelatase precursor that performs the last step in heme biosynthesis	HEM15		ferrochelatase precursor that performs the last step in heme biosynthesis	orf19.9436	IPF25439.1	Contig20135:complement(30543..29485)
orf19.1881_1434	1206.25	0.179246	0.268734	0.846691	0.179246	0.673032	-1.48581	FLT down vs GRD	2.16666	1.58077	0.0398838	1	orf19.1881_1434	, , orf19.9437 | IPF25428.1 | Contig20135:complement(33171..31363) , conserved hypothetical membrane protein			conserved hypothetical membrane protein	orf19.9437	IPF25428.1	Contig20135:complement(33171..31363)
orf19.1883_2845	300.188	0.652639	0.656142	0.0976287	0.652639	0.859509	-1.16345	FLT down vs GRD	0.21852	0.672386	3.51624	1	orf19.1883_2845	YCS4 , , orf19.9439 | IPF25461.1 | Contig20135:complement(36939..33421) , subunit of the condensin protein complex required for proper chromosome condensation and segregation	YCS4		subunit of the condensin protein complex required for proper chromosome condensation and segregation	orf19.9439	IPF25461.1	Contig20135:complement(36939..33421)
orf19.1885_528	711.813	0.5076	0.258414	0.0235901	0.5076	0.847058	-1.18056	FLT down vs GRD	0.481007	1.62224	7.77923	1	orf19.1885_528	TAF4 , , orf19.9441 | IPF9150.1 | Contig20135:complement(38313..37222) , transcription factor TFIID subunit	TAF4		transcription factor TFIID subunit	orf19.9441	IPF9150.1	Contig20135:complement(38313..37222)
orf19.1886_400	215.125	0.406492	0.0641278	0.577835	0.406492	1.63363	1.63363	FLT up vs GRD	0.767619	3.32482	0.336482	1	orf19.1886_400	RCL1 , , orf19.9442 | IPF25440.1 | Contig20135:38974..40089 , RNA 3 -terminal phosphate cyclase	RCL1		RNA 3 -terminal phosphate cyclase	orf19.9442	IPF25440.1	Contig20135:38974..40089
orf19.1887_1344	1188.63	0.185446	0.198116	0.991019	0.185446	1.23754	1.23754	FLT up vs GRD	2.09884	1.911	0.000134848	1	orf19.1887_1344	TGL , , orf19.9443 | IPF25430.1 | Contig20135:40735..42438 , similarity to triacylglycerol lipases	TGL		similarity to triacylglycerol lipases	orf19.9443	IPF25430.1	Contig20135:40735..42438
orf19.1888_684	2009.75	0.000965115	0.000136461	0.71192	0.000965115	1.53976	1.53976	FLT up vs GRD	25.704	23.5601	0.146448	1	orf19.1888_684	URH1 , , orf19.9444 | IPF25442.1 | Contig20135:43335..44327 , uridine ribohydrolase	URH1		uridine ribohydrolase	orf19.9444	IPF25442.1	Contig20135:43335..44327
orf19.1889_466	2276.31	0.139674	0.0695156	0.115705	0.139674	0.730067	-1.36974	FLT down vs GRD	2.68899	3.21165	3.11239	1	orf19.1889_466	, , orf19.9445 | IPF25444.1 | Contig20135:complement(45161..44439) , similar to phosphoglycerate mutase			similar to phosphoglycerate mutase	orf19.9445	IPF25444.1	Contig20135:complement(45161..44439)
orf19.1890_1304	1015.63	0.33035	0.0208534	0.898558	0.33035	0.880659	-1.13551	FLT down vs GRD	1.074	5.14512	0.017316	1	orf19.1890_1304	, , orf19.9446 | IPF25432.1 | Contig20135:complement(46983..45517) , conserved hypothetical protein			conserved hypothetical protein	orf19.9446	IPF25432.1	Contig20135:complement(46983..45517)
orf19.1891_375	6589.56	0.895214	0.641538	0.886071	0.895214	1.03976	1.03976	FLT up vs GRD	0.0184843	0.695803	0.0218785	1	orf19.1891_375	38443 , 38443 , orf19.9447 | IPF25433.1 | Contig20135:47964..49478 , vacuolar aspartic proteinase precursor	38443	38443	vacuolar aspartic proteinase precursor	orf19.9447	IPF25433.1	Contig20135:47964..49478
orf19.1893_1810	726.75	0.300234	0.132502	0.715367	0.300234	1.34327	1.34327	FLT up vs GRD	1.22671	2.37672	0.142774	1	orf19.1893_1810	, , orf19.9449 | IPF25421.1 | Contig20135:50067..52457 , hypothetical protein			hypothetical protein	orf19.9449	IPF25421.1	Contig20135:50067..52457
orf19.1896_1676	12193.8	0.0215612	0.496392	0.104778	0.0215612	1.50919	1.50919	FLT up vs GRD	8.10836	0.955554	3.34568	1	orf19.1896_1676	SSC1 , , orf19.9452 | IPF25425.1 | Contig20135:complement(54711..52765) , mitochondrial heat shock protein of the HSP70 family	SSC1		mitochondrial heat shock protein of the HSP70 family	orf19.9452	IPF25425.1	Contig20135:complement(54711..52765)
orf19.1897_896	1099	0.0998	0.19044	0.0476989	0.0998	1.39649	1.39649	FLT up vs GRD	3.46277	1.95514	5.45776	1	orf19.1897_896	, , orf19.9453 | IPF25441.1 | Contig20135:complement(56322..55288) , conserved hypothetical protein			conserved hypothetical protein	orf19.9453	IPF25441.1	Contig20135:complement(56322..55288)
orf19.190_908	610.75	0.267456	0.605861	0.214964	0.267456	1.36925	1.36925	FLT up vs GRD	1.42062	0.754668	1.81376	1	orf19.190_908	, , orf19.7820 | IPF27134.1 | Contig20044:complement(10421..9447) , conserved hypothetical protein			conserved hypothetical protein	orf19.7820	IPF27134.1	Contig20044:complement(10421..9447)
orf19.1900_849	372.938	0.797568	0.0241742	0.632038	0.797568	0.94751	-1.0554	FLT down vs GRD	0.0703262	4.87692	0.247776	1	orf19.1900_849	TGS1 , , orf19.9456 | IPF25434.1 | Contig20135:complement(58146..56695) , TrimethylGuanosine Synthase	TGS1		TrimethylGuanosine Synthase	orf19.9456	IPF25434.1	Contig20135:complement(58146..56695)
orf19.1901_1877	587.188	0.0449932	0.0467628	0.355055	0.0449932	0.68313	-1.46385	FLT down vs GRD	5.63396	3.78869	0.963503	1	orf19.1901_1877	MCM3 , , orf19.9457 | IPF25419.1 | Contig20135:complement(61053..58417) , member of complex that acts at ARS's to initiate replication	MCM3		member of complex that acts at ARS's to initiate replication	orf19.9457	IPF25419.1	Contig20135:complement(61053..58417)
orf19.1902_1514	509.75	0.0222659	0.260291	0.102046	0.0222659	0.530147	-1.88627	FLT down vs GRD	7.98976	1.61456	3.40902	1	orf19.1902_1514	NOC4 , , orf19.9458 | IPF25429.1 | Contig20135:complement(62997..61402) , nucleolar U3 snoRNP protein	NOC4		nucleolar U3 snoRNP protein	orf19.9458	IPF25429.1	Contig20135:complement(62997..61402)
orf19.1903_5826	1647.31	0.939405	0.596986	0.36602	0.939405	1.01857	1.01857	FLT up vs GRD	0.00615276	0.769725	0.91815	1	orf19.1903_5826	TOR2 , , orf19.9459 | IPF25458.1 | Contig20135:complement(68058..63949) , phosphatidylinositol 3-kinase	TOR2		phosphatidylinositol 3-kinase	orf19.9459	IPF25458.1	Contig20135:complement(68058..63949)
orf19.1906_32	126.563	0.733325	0.103404	0.162282	0.733325	0.823351	-1.21455	FLT down vs GRD	0.124496	2.68372	2.3696	1	orf19.1906_32	, , orf19.9462 | IPF25415.1 | Contig20136:complement(837..487) , hypothetical protein			hypothetical protein	orf19.9462	IPF25415.1	Contig20136:complement(837..487)
orf19.1907_2013	3061.06	0.129885	0.0226221	0.272515	0.129885	1.19275	1.19275	FLT up vs GRD	2.84942	4.99618	1.38852	1	orf19.1907_2013	, , orf19.9463 | IPF25401.1 | Contig20136:2024..4177 , conserved hypothetical protein			conserved hypothetical protein	orf19.9463	IPF25401.1	Contig20136:2024..4177
orf19.191_1979	524.688	0.824542	0.0653216	0.185251	0.824542	0.951978	-1.05044	FLT down vs GRD	0.0524856	3.29876	2.10093	1	orf19.191_1979	KIC1 , , orf19.7821 | IPF27130.1 | Contig20044:complement(13420..10745) , protein kinase that interacts with Cdc31p	KIC1		protein kinase that interacts with Cdc31p	orf19.7821	IPF27130.1	Contig20044:complement(13420..10745)
orf19.1910_364	563.188	0.80075	0.307811	0.953686	0.80075	0.958709	-1.04307	FLT down vs GRD	0.0680761	1.43888	0.0035909	1	orf19.1910_364	OXR2 , , orf19.9466 | IPF15444.2 | Contig20136:complement(4811..4188) , putative oxydoreductase	OXR2		putative oxydoreductase	orf19.9466	IPF15444.2	Contig20136:complement(4811..4188)
orf19.1911_237	3494.94	0.00412019	0.310197	0.987375	0.00412019	2.39232	2.39232	FLT up vs GRD	15.7592	1.43089	0.000266502	1	orf19.1911_237	TOS2 , , orf19.9467 | IPF15442.1 | Contig20136:5221..6375 , Target of SBF	TOS2		Target of SBF	orf19.9467	IPF15442.1	Contig20136:5221..6375
orf19.1913_406	785.25	0.748731	0.5883	0.49228	0.748731	0.913666	-1.09449	FLT down vs GRD	0.10994	0.784638	0.517763	1	orf19.1913_406	, , orf19.9469 | IPF15439.1 | Contig20136:complement(7198..6383) , hypothetical protein			hypothetical protein	orf19.9469	IPF15439.1	Contig20136:complement(7198..6383)
orf19.1914_401	1156.63	0.148059	0.37725	0.362674	0.148059	1.37618	1.37618	FLT up vs GRD	2.56299	1.2309	0.931764	1	orf19.1914_401	, , orf19.9470 | IPF15437.1 | Contig20136:7193..8536 , hypothetical protein			hypothetical protein	orf19.9470	IPF15437.1	Contig20136:7193..8536
orf19.1915_1004	1689.38	0.161185	0.153466	0.325879	0.161185	1.20485	1.20485	FLT up vs GRD	2.38369	2.20229	1.09534	1	orf19.1915_1004	MPP10 , , orf19.9471 | IPF19846.2 | Contig20136:8743..10266 , component of the U3 small nucleolar ribonucleoprotein (snoRNP)	MPP10		component of the U3 small nucleolar ribonucleoprotein (snoRNP)	orf19.9471	IPF19846.2	Contig20136:8743..10266
orf19.1917_342	1336.19	0.625127	0.823577	0.274346	0.625127	1.12723	1.12723	FLT up vs GRD	0.258115	0.418921	1.37711	1	orf19.1917_342	, , orf19.9473 | IPF25402.1 | Contig20136:10397..11482 , conserved hypothetical protein			conserved hypothetical protein	orf19.9473	IPF25402.1	Contig20136:10397..11482
orf19.192_1575	607.938	0.560106	0.519307	0.394627	0.560106	0.801953	-1.24696	FLT down vs GRD	0.369552	0.91037	0.809199	1	orf19.192_1575	, , orf19.7822 | IPF27132.1 | Contig20044:complement(16157..14142) , conserved hypothetical protein			conserved hypothetical protein	orf19.7822	IPF27132.1	Contig20044:complement(16157..14142)
orf19.1920_358	296.5	0.0370249	0.205045	0.15437	0.0370249	0.518471	-1.92875	FLT down vs GRD	6.24281	1.87287	2.47424	1	orf19.1920_358	PIR3 , , orf19.9476 | IPF25405.1 | Contig20136:11745..12116 , putative cell wall protein of the PIR family	PIR3		putative cell wall protein of the PIR family	orf19.9476	IPF25405.1	Contig20136:11745..12116
orf19.1923_1605	2321.19	0.538796	0.719999	0.672775	0.538796	1.1813	1.1813	FLT up vs GRD	0.412234	0.573516	0.192092	1	orf19.1923_1605	RRN3 , , orf19.9479 | IPF19884.2 | Contig20136:complement(14078..12291) , RNA polymerase I transcription factor	RRN3		RNA polymerase I transcription factor	orf19.9479	IPF19884.2	Contig20136:complement(14078..12291)
orf19.1925_42	3425.63	0.00466405	0.484699	0.30479	0.00466405	2.15459	2.15459	FLT up vs GRD	15.067	0.979397	1.20219	1	orf19.1925_42	CTA2-10 , , orf19.9481 | IPF17379.3 | Contig20136:complement(15420..14848) , transcription factor	CTA2-10		transcription factor	orf19.9481	IPF17379.3	Contig20136:complement(15420..14848)
orf19.1926_32	271.75	0.611106	0.610573	0.319653	0.611106	0.859872	-1.16296	FLT down vs GRD	0.279934	0.746746	1.12579	1	orf19.1926_32	SEF2 , , orf19.9482 | IPF25372.1 | Contig20137:complement(1374..1) , putative transcription factor	SEF2		putative transcription factor	orf19.9482	IPF25372.1	Contig20137:complement(1374..1)
orf19.1927_385	542.188	0.99636	0.814426	0.261106	0.99636	0.998831	-1.00117	FLT down vs GRD	2.21e-05	0.43262	1.46217	1	orf19.1927_385	, , orf19.9483 | IPF19001.2 | Contig20137:2770..3378 , hypothetical protein			hypothetical protein	orf19.9483	IPF19001.2	Contig20137:2770..3378
orf19.193_44	343.125	0.0559834	0.0295839	0.698108	0.0559834	0.600485	-1.66532	FLT down vs GRD	4.98888	4.52548	0.16172	1	orf19.193_44	, , orf19.7823 | IPF27135.1 | Contig20044:17040..17879 , hypothetical protein			hypothetical protein	orf19.7823	IPF27135.1	Contig20044:17040..17879
orf19.1930_1638	159.063	0.0978944	0.788732	0.211225	0.0978944	0.46358	-2.15712	FLT down vs GRD	3.50962	0.470861	1.84682	1	orf19.1930_1638	FRE4 , , orf19.9486 | IPF25358.1 | Contig20137:complement(5749..3617) , ferric reductase	FRE4		ferric reductase	orf19.9486	IPF25358.1	Contig20137:complement(5749..3617)
orf19.1932_1919	388.188	0.00290779	0.068116	0.198682	0.00290779	2.88461	2.88461	FLT up vs GRD	17.8255	3.23998	1.96386	1	orf19.1932_1919	FRE5 , , orf19.9488 | IPF9791.2 | Contig20137:complement(10870..8738) , ferric reductase	FRE5		ferric reductase	orf19.9488	IPF9791.2	Contig20137:complement(10870..8738)
orf19.1933_1396	586.438	0.197608	0.121435	0.0126109	0.197608	0.844572	-1.18403	FLT down vs GRD	1.97435	2.48285	10.2405	1	orf19.1933_1396	PEX29 , , orf19.9489 | IPF9789.2 | Contig20137:complement(14674..12824) , peroxin, involved in peroxisome biogenesis	PEX29		peroxin, involved in peroxisome biogenesis	orf19.9489	IPF9789.2	Contig20137:complement(14674..12824)
orf19.1934_1283	569.125	0.373004	0.415727	0.189724	0.373004	0.598707	-1.67026	FLT down vs GRD	0.890344	1.13306	2.05382	1	orf19.1934_1283	HST3 , , orf19.9490 | IPF25371.1 | Contig20137:complement(16609..15149) , silencing protein similar to SIR2	HST3		silencing protein similar to SIR2	orf19.9490	IPF25371.1	Contig20137:complement(16609..15149)
orf19.1935_377	246.375	0.0238724	0.901359	0.446109	0.0238724	0.528946	-1.89055	FLT down vs GRD	7.73626	0.297192	0.642064	1	orf19.1935_377	, , , hypothetical protein			hypothetical protein
orf19.1936_1758	2008.19	0.316227	0.0703695	0.0779851	0.316227	1.13115	1.13115	FLT up vs GRD	1.14293	3.1947	4.08285	1	orf19.1936_1758	SNF1 , , orf19.9491 | IPF9571.2 | Contig20137:complement(19581..17728) , carbon catabolite derepressing ser/thr protein kinase	SNF1		carbon catabolite derepressing ser/thr protein kinase	orf19.9491	IPF9571.2	Contig20137:complement(19581..17728)
orf19.1938_572	420.188	0.942993	0.309608	0.109015	0.942993	0.961673	-1.03985	FLT down vs GRD	0.00544432	1.43285	3.2516	1	orf19.1938_572	, , orf19.9493 | IPF9568.1 | Contig20137:complement(20490..19846) , putative splicing factor			putative splicing factor	orf19.9493	IPF9568.1	Contig20137:complement(20490..19846)
orf19.1939_330	201.313	0.846022	0.230472	0.262223	0.846022	1.06167	1.06167	FLT up vs GRD	0.0402379	1.74496	1.45476	1	orf19.1939_330	, , orf19.9494 | IPF25374.1 | Contig20137:21683..22777 , conserved hypothetical protien			conserved hypothetical protien	orf19.9494	IPF25374.1	Contig20137:21683..22777
orf19.194_871	964.438	0.910048	0.825844	0.509413	0.910048	0.972591	-1.02818	FLT down vs GRD	0.0135965	0.415519	0.476791	1	orf19.194_871	, , orf19.7824 | IPF19562.1 | Contig20044:complement(19573..17951) , hypothetical protein			hypothetical protein	orf19.7824	IPF19562.1	Contig20044:complement(19573..17951)
orf19.1940_659	2275.75	0.261605	0.216732	0.803307	0.261605	1.15276	1.15276	FLT up vs GRD	1.45885	1.81189	0.0662964	1	orf19.1940_659	CAT5 , , orf19.9495 | IPF25378.1 | Contig20137:22849..23811 , mitochondrial protein involved in ubiquinone biosynthesis	CAT5		mitochondrial protein involved in ubiquinone biosynthesis	orf19.9495	IPF25378.1	Contig20137:22849..23811
orf19.1941_984	725.938	0.14004	0.103545	0.73364	0.14004	1.13696	1.13696	FLT up vs GRD	2.68329	2.68199	0.124188	1	orf19.1941_984	NUF2 , , orf19.9496 | IPF25366.1 | Contig20137:23948..25534 , spindle pole body protein	NUF2		spindle pole body protein	orf19.9496	IPF25366.1	Contig20137:23948..25534
orf19.1942_1746	1060.69	0.950463	0.637027	0.57606	0.950463	0.981698	-1.01864	FLT down vs GRD	0.00410887	0.703111	0.339697	1	orf19.1942_1746	AZR2 , , orf19.9497 | IPF9560.2 | Contig20137:complement(27499..25616) , MDR transporter	AZR2		MDR transporter	orf19.9497	IPF9560.2	Contig20137:complement(27499..25616)
orf19.1943_1174	161.313	0.986979	0.0956586	0.347881	0.986979	0.991439	-1.00864	FLT down vs GRD	0.00028348	2.78358	0.994358	1	orf19.1943_1174	, , orf19.9498 | IPF11277.2 | Contig20137:complement(30384..28015) , hypothetical protein			hypothetical protein	orf19.9498	IPF11277.2	Contig20137:complement(30384..28015)
orf19.1944_2211	1337.13	0.468654	0.0864035	0.214298	0.468654	1.10039	1.10039	FLT up vs GRD	0.578686	2.91671	1.81959	1	orf19.1944_2211	GPR1 , , orf19.9499 | IPF11281.2 | Contig20137:complement(33422..30951) , G-protein coupled receptor	GPR1		G-protein coupled receptor	orf19.9499	IPF11281.2	Contig20137:complement(33422..30951)
orf19.1945_414	1444.94	0.830023	0.40091	0.703037	0.830023	1.0405	1.0405	FLT up vs GRD	0.0491975	1.16954	0.156168	1	orf19.1945_414	AUR1 , , orf19.9500 | IPF11286.2 | Contig20137:complement(37250..35835) , inositol phosphoceramide synthase	AUR1		inositol phosphoceramide synthase	orf19.9500	IPF11286.2	Contig20137:complement(37250..35835)
orf19.1946_664	3212.63	0.000102136	0.129046	0.700091	0.000102136	0.323784	-3.08848	FLT down vs GRD	50.3899	2.40867	0.159473	1	orf19.1946_664	, , orf19.9501 | IPF16195.1 | Contig20137:38876..39775 , conserved hypothetical protein			conserved hypothetical protein	orf19.9501	IPF16195.1	Contig20137:38876..39775
orf19.1948_876	600.875	0.0404544	0.138406	0.0645784	0.0404544	1.37287	1.37287	FLT up vs GRD	5.96211	2.32439	4.58802	1	orf19.1948_876	, , orf19.9504 | IPF25376.1 | Contig20137:complement(41209..40121) , hypothetical protein			hypothetical protein	orf19.9504	IPF25376.1	Contig20137:complement(41209..40121)
orf19.1949_1782	1862.88	0.616088	0.226407	0.969792	0.616088	1.11779	1.11779	FLT up vs GRD	0.27205	1.76427	0.00152643	1	orf19.1949_1782	VPS1 , , orf19.9505 | IPF19611.2 | Contig20137:complement(43948..41867) , GTPase involved in vacuolar protein sorting	VPS1		GTPase involved in vacuolar protein sorting	orf19.9505	IPF19611.2	Contig20137:complement(43948..41867)
orf19.195_287	221.75	0.832284	0.0175394	0.365843	0.832284	1.06103	1.06103	FLT up vs GRD	0.0478739	5.47167	0.918864	1	orf19.195_287	, , orf19.7825 | IPF16389.1 | Contig20044:20835..22565 , hypothetical protein			hypothetical protein	orf19.7825	IPF16389.1	Contig20044:20835..22565
orf19.1950_200	1091.13	0.027465	0.504214	0.0982057	0.027465	0.678683	-1.47344	FLT down vs GRD	7.2401	0.939909	3.50188	1	orf19.1950_200	, , orf19.9506 | IPF12138.1 | Contig20137:complement(44768..44298) , putative hydrolase			putative hydrolase	orf19.9506	IPF12138.1	Contig20137:complement(44768..44298)
orf19.1952_39	602.938	0.127565	0.0175767	0.307883	0.127565	1.21231	1.21231	FLT up vs GRD	2.88978	5.46759	1.18584	1	orf19.1952_39	, , orf19.9508 | IPF12141.1 | Contig20137:complement(45974..44862) , hypothetical protein			hypothetical protein	orf19.9508	IPF12141.1	Contig20137:complement(45974..44862)
orf19.1953_105	356.188	0.419593	0.0241761	0.834424	0.419593	0.855905	-1.16835	FLT down vs GRD	0.723934	4.87678	0.0466385	1	orf19.1953_105	, , , hypothetical protein			hypothetical protein
orf19.1954_887	1368.81	0.863003	0.815031	0.389558	0.863003	0.957028	-1.0449	FLT down vs GRD	0.0317519	0.431716	0.827582	1	orf19.1954_887	PUS4 , , orf19.9509 | IPF16835.2 | Contig20137:complement(47276..46116) , pseudouridine synthase	PUS4		pseudouridine synthase	orf19.9509	IPF16835.2	Contig20137:complement(47276..46116)
orf19.1955_111	376.75	0.265371	0.231225	0.715672	0.265371	0.775822	-1.28896	FLT down vs GRD	1.4341	1.74143	0.142451	1	orf19.1955_111	SHR5 , , orf19.9510 | IPF16837.1 | Contig20137:complement(48172..47474) , involved in RAS localization and palmitoylation	SHR5		involved in RAS localization and palmitoylation	orf19.9510	IPF16837.1	Contig20137:complement(48172..47474)
orf19.1956_2126	1368.19	0.304345	0.243915	0.711944	0.304345	0.834755	-1.19796	FLT down vs GRD	1.20456	1.68387	0.146423	1	orf19.1956_2126	, , orf19.9511 | IPF19331.2 | Contig20137:49183..51444 , hypothetical protein			hypothetical protein	orf19.9511	IPF19331.2	Contig20137:49183..51444
orf19.1957_131	1873.44	0.811279	0.358328	0.00970136	0.811279	0.970543	-1.03035	FLT down vs GRD	0.0609099	1.28307	11.3962	1	orf19.1957_131	CYC3 , , orf19.9512 | IPF14754.1 | Contig20137:complement(52362..51781) , holocytochrome-c synthase	CYC3		holocytochrome-c synthase	orf19.9512	IPF14754.1	Contig20137:complement(52362..51781)
orf19.1958_238	248.563	0.79614	0.108283	0.575548	0.79614	1.11911	1.11911	FLT up vs GRD	0.0713487	2.62539	0.340628	1	orf19.1958_238	, , orf19.9513 | IPF25382.1 | Contig20137:complement(59578..59000) , hypothetical protein			hypothetical protein	orf19.9513	IPF25382.1	Contig20137:complement(59578..59000)
orf19.1959_823	923.625	0.104584	0.000233135	0.756501	0.104584	0.8625	-1.15942	FLT down vs GRD	3.35011	20.3421	0.102984	1	orf19.1959_823	, , orf19.9514 | IPF25377.1 | Contig20137:complement(60906..59935) , conserved hypothetical protein			conserved hypothetical protein	orf19.9514	IPF25377.1	Contig20137:complement(60906..59935)
orf19.1960_1314	622.625	0.00417344	0.144308	0.7857	0.00417344	0.478361	-2.09047	FLT down vs GRD	15.6865	2.27472	0.0790683	1	orf19.1960_1314	CLN3 , , orf19.9515 | IPF10874.1 | Contig20137:68654..70051 , G1 cyclin	CLN3		G1 cyclin	orf19.9515	IPF10874.1	Contig20137:68654..70051
orf19.1961_1431	824.375	0.00144185	0.119928	0.471304	0.00144185	0.611108	-1.63637	FLT down vs GRD	22.5799	2.49821	0.571583	1	orf19.1961_1431	, , orf19.9516 | IPF14506.1 | Contig20137:77810..79393 , conserved hypothetical protein			conserved hypothetical protein	orf19.9516	IPF14506.1	Contig20137:77810..79393
orf19.1963_1144	2382.13	0.0120661	0.478162	0.666437	0.0120661	0.424681	-2.35471	FLT down vs GRD	10.4296	0.992974	0.200187	1	orf19.1963_1144	GDS1 , , orf19.9519 | IPF25364.1 | Contig20137:83173..84696 , involved in nuclear control of mitochondria	GDS1		involved in nuclear control of mitochondria	orf19.9519	IPF25364.1	Contig20137:83173..84696
orf19.1964_1066	1130	0.531039	0.00650762	0.0116198	0.531039	0.915079	-1.0928	FLT down vs GRD	0.428612	7.63309	10.5928	1	orf19.1964_1066	, , orf19.9520 | IPF25368.1 | Contig20137:86786..88282 , conserved hypothetical protein			conserved hypothetical protein	orf19.9520	IPF25368.1	Contig20137:86786..88282
orf19.1966_120	816.063	0.0229972	0.0161586	0.367962	0.0229972	1.64114	1.64114	FLT up vs GRD	7.87159	5.63125	0.910333	1	orf19.1966_120	BUD23 , , orf19.9522 | IPF25379.1 | Contig20137:88631..89446 , bud site selection protein	BUD23		bud site selection protein	orf19.9522	IPF25379.1	Contig20137:88631..89446
orf19.1967_335	2659.69	0.201619	0.00528813	0.674205	0.201619	1.17134	1.17134	FLT up vs GRD	1.93557	8.15597	0.190294	1	orf19.1967_335	IMG1 , , orf19.9523 | IPF25383.1 | Contig20137:89831..90307 , mitochondrial ribosomal protein	IMG1		mitochondrial ribosomal protein	orf19.9523	IPF25383.1	Contig20137:89831..90307
orf19.1968.1	447.75	0.0178964	0.112524	0.0295072	0.0178964	1.70299	1.70299	FLT up vs GRD	8.8154	2.57723	6.9933	1	orf19.1968.1	MAK31 , , orf19.9524.1 | IPF25390.1 | Contig20137:91299..91574 , Sm protein involved in stability of L-A dsRNA-containing particles	MAK31		Sm protein involved in stability of L-A dsRNA-containing particles	orf19.9524.1	IPF25390.1	Contig20137:91299..91574
orf19.1968_128	519.375	0.00323394	0.531568	0.10934	0.00323394	0.601892	-1.66143	FLT down vs GRD	17.1757	0.886963	3.24458	1	orf19.1968_128	, , orf19.9524 | IPF25386.1 | Contig20137:complement(90699..90376) , hypothetical protein			hypothetical protein	orf19.9524	IPF25386.1	Contig20137:complement(90699..90376)
orf19.1969_300	71.375	0.674392	0.143111	0.661322	0.674392	0.827197	-1.2089	FLT down vs GRD	0.190059	2.28459	0.206868	1	orf19.1969_300	CCW14 , , orf19.9525 | IPF6292.2 | Contig20137:complement(92409..91582) , cell wall mannoprotein involved in cell stress response	CCW14		cell wall mannoprotein involved in cell stress response	orf19.9525	IPF6292.2	Contig20137:complement(92409..91582)
orf19.1970_171	653.313	0.889357	0.799058	0.844901	0.889357	1.04856	1.04856	FLT up vs GRD	0.0206248	0.455517	0.0408349	1	orf19.1970_171	CVB1 , , orf19.9526 | IPF18882.2 | Contig20137:93053..93757 , complements S.cerevisiae vacuole biogenesis mutant, unpublished	CVB1		complements S.cerevisiae vacuole biogenesis mutant, unpublished	orf19.9526	IPF18882.2	Contig20137:93053..93757
orf19.1971_1212	1072.31	0.0011408	0.00323133	0.771507	0.0011408	1.53497	1.53497	FLT up vs GRD	24.364	9.50992	0.0902594	1	orf19.1971_1212	, , orf19.9527 | IPF25369.1 | Contig20137:complement(96024..94540) , conserved zinc finger protein			conserved zinc finger protein	orf19.9527	IPF25369.1	Contig20137:complement(96024..94540)
orf19.1972_1241	1202.44	0.164768	0.0239459	0.00605807	0.164768	0.871117	-1.14795	FLT down vs GRD	2.33811	4.89386	13.6769	1	orf19.1972_1241	SET5 , , orf19.9528 | IPF25370.1 | Contig20137:96957..98378 , conserved hypthetical protein	SET5		conserved hypthetical protein	orf19.9528	IPF25370.1	Contig20137:96957..98378
orf19.1973_447	401.75	0.0486739	0.0333313	0.294811	0.0486739	1.63296	1.63296	FLT up vs GRD	5.39737	4.32577	1.25662	1	orf19.1973_447	HAP5 , , orf19.9529 | IPF25373.1 | Contig20137:98653..99699 , CCAAT- binding transcription factor component	HAP5		CCAAT- binding transcription factor component	orf19.9529	IPF25373.1	Contig20137:98653..99699
orf19.1974_25	7297.06	0.393065	0.615968	0.658035	0.393065	1.14109	1.14109	FLT up vs GRD	0.814823	0.737733	0.211232	1	orf19.1974_25	TFS1 , , orf19.9530 | IPF8684.2 | Contig20137:100506..101141 , carboxypeptidase Y inhibitor	TFS1		carboxypeptidase Y inhibitor	orf19.9530	IPF8684.2	Contig20137:100506..101141
orf19.1975_266	689	0.578201	0.706172	0.640156	0.578201	1.28438	1.28438	FLT up vs GRD	0.335821	0.594522	0.235972	1	orf19.1975_266	DIB1 , , orf19.9531 | IPF8685.2 | Contig20137:complement(101665..101219) , component of U4/U6.U5 pre-mRNA splicing complex	DIB1		component of U4/U6.U5 pre-mRNA splicing complex	orf19.9531	IPF8685.2	Contig20137:complement(101665..101219)
orf19.1976_183	2873.56	7.22e-06	0.0696196	0.00555849	7.22e-06	11.8171	11.8171	FLT up vs GRD	104.421	3.20957	14.1242	1	orf19.1976_183	TRX1 , , orf19.9532 | IPF25391.1 | Contig20137:102411..102632 , thioredoxin II	TRX1		thioredoxin II	orf19.9532	IPF25391.1	Contig20137:102411..102632
orf19.1977_952	1905.25	0.436472	0.433473	0.827061	0.436472	1.07818	1.07818	FLT up vs GRD	0.670852	1.09114	0.0509601	1	orf19.1977_952	URA4 , , orf19.9533 | IPF25375.1 | Contig20137:102956..104032 , dihydrooratase	URA4		dihydrooratase	orf19.9533	IPF25375.1	Contig20137:102956..104032
orf19.1978_1069	277.5	0.247036	0.00588779	0.00814489	0.247036	1.22762	1.22762	FLT up vs GRD	1.55954	7.88197	12.2113	1	orf19.1978_1069	GIT2 , , orf19.9534 | IPF18978.2 | Contig20137:106293..107897 , glycerophosphoinositol permease	GIT2		glycerophosphoinositol permease	orf19.9534	IPF18978.2	Contig20137:106293..107897
orf19.1979_601	1436.25	0.00231163	0.582586	0.739311	0.00231163	3.65054	3.65054	FLT up vs GRD	19.2889	0.794547	0.118719	1	orf19.1979_601	GIT3 , , orf19.9535 | IPF25363.1 | Contig20137:110036..111643 , glycerophosphoinositol permease	GIT3		glycerophosphoinositol permease	orf19.9535	IPF25363.1	Contig20137:110036..111643
orf19.198_1588	3866.94	0.980808	0.233739	0.650262	0.980808	0.997109	-1.0029	FLT down vs GRD	0.000615927	1.72974	0.221778	1	orf19.198_1588	ASN1 , , orf19.7828 | IPF27104.1 | Contig20045:1181..2902 , asparagine synthetase	ASN1		asparagine synthetase	orf19.7828	IPF27104.1	Contig20045:1181..2902
orf19.1980_849	73.4375	0.896522	0.863928	0.318076	0.896522	1.0631	1.0631	FLT up vs GRD	0.0180225	0.357418	1.13365	1	orf19.1980_849	GIT4 , , orf19.9536 | IPF25367.1 | Contig20137:113096..114694 , glycerophosphoinositol permease	GIT4		glycerophosphoinositol permease	orf19.9536	IPF25367.1	Contig20137:113096..114694
orf19.1981_148	413	0.450779	0.402521	0.0743957	0.450779	1.14805	1.14805	FLT up vs GRD	0.628488	1.16551	4.20649	1	orf19.1981_148	IMP2 , , orf19.9537 | IPF25384.1 | Contig20137:complement(115596..115108) , mitochondrial inner membrane protease subunit	IMP2		mitochondrial inner membrane protease subunit	orf19.9537	IPF25384.1	Contig20137:complement(115596..115108)
orf19.1982_8	1626.19	0.000301181	0.048722	0.00132447	0.000301181	0.549015	-1.82144	FLT down vs GRD	36.7731	3.72645	23.2147	1	orf19.1982_8	, , orf19.9538 | IPF25393.1 | Contig20137:115930..116247 , conserved hypothetical protein			conserved hypothetical protein	orf19.9538	IPF25393.1	Contig20137:115930..116247
orf19.1983_326	230.625	0.175359	0.0208194	0.541558	0.175359	0.601398	-1.66279	FLT down vs GRD	2.2108	5.14814	0.406515	1	orf19.1983_326	PFS3 , , orf19.9539 | IPF25380.1 | Contig20137:complement(117087..116326) , polyadenylation factor I subunit	PFS3		polyadenylation factor I subunit	orf19.9539	IPF25380.1	Contig20137:complement(117087..116326)
orf19.1984_620	54.4375	0.193311	0.215985	0.512867	0.193311	0.546635	-1.82937	FLT down vs GRD	2.01711	1.81567	0.468838	1	orf19.1984_620	, , , conserved hypothetical protein			conserved hypothetical protein
orf19.1985_249	354.5	0.000109522	0.0323288	0.00187542	0.000109522	0.391584	-2.55373	FLT down vs GRD	49.395	4.37637	20.6986	1	orf19.1985_249	, , , conserved hypothetical protein			conserved hypothetical protein
orf19.1986_852	1884.06	0.410662	0.0106083	0.0787529	0.410662	1.11937	1.11937	FLT up vs GRD	0.753468	6.50228	4.05736	1	orf19.1986_852	ARO2 , , , chorismate synthase	ARO2		chorismate synthase
orf19.1988_1522	783.063	0.654657	0.393864	0.839466	0.654657	1.17815	1.17815	FLT up vs GRD	0.215777	1.1874	0.043795	1	orf19.1988_1522	CDC45 , , , chromosomal DNA replication initiation protein	CDC45		chromosomal DNA replication initiation protein
orf19.1989_925	1579.75	0.185189	0.220011	0.00183891	0.185189	0.852333	-1.17325	FLT down vs GRD	2.1016	1.79547	20.835	1	orf19.1989_925	DCW1 , , orf19.9540 | IPF25268.1 | Contig20139:233..1591 , Defective Cell Wall	DCW1		Defective Cell Wall	orf19.9540	IPF25268.1	Contig20139:233..1591
orf19.199_1364	1445.25	0.104199	0.23909	0.328859	0.104199	0.735003	-1.36054	FLT down vs GRD	3.35892	1.70534	1.08107	1	orf19.199_1364	, , orf19.7829 | IPF27109.1 | Contig20045:3746..5281 , hypothetical protein			hypothetical protein	orf19.7829	IPF27109.1	Contig20045:3746..5281
orf19.1990_1536	729.875	0.00633154	0.752032	0.219629	0.00633154	0.644251	-1.55219	FLT down vs GRD	13.4512	0.525424	1.77361	1	orf19.1990_1536	SNX4 , , orf19.9541 | IPF25265.1 | Contig20139:2186..3556 , Sorting NeXin	SNX4		Sorting NeXin	orf19.9541	IPF25265.1	Contig20139:2186..3556
orf19.1991_1013	389.563	0.0815122	0.293034	0.0646014	0.0815122	0.629607	-1.58829	FLT down vs GRD	3.96831	1.48997	4.58704	1	orf19.1991_1013	PTM1 , , orf19.9542 | IPF19793.1 | Contig20139:complement(6113..4380) , member of the major facilitator superfamily	PTM1		member of the major facilitator superfamily	orf19.9542	IPF19793.1	Contig20139:complement(6113..4380)
orf19.1992_1133	269.875	0.406793	0.983137	0.878151	0.406793	0.677773	-1.47542	FLT down vs GRD	0.76659	0.123162	0.0250557	1	orf19.1992_1133	SIR3 , , orf19.9544 | IPF17303.2 | Contig20139:7479..9032 , regulator of silencing	SIR3		regulator of silencing	orf19.9544	IPF17303.2	Contig20139:7479..9032
orf19.1993_1082	1863.81	0.946392	0.724687	0.623066	0.946392	1.01633	1.01633	FLT up vs GRD	0.00481321	0.566433	0.26125	1	orf19.1993_1082	RPN9 , , orf19.9545 | IPF25273.1 | Contig20139:complement(10590..9349) , 26S proteasome regulatory particle	RPN9		26S proteasome regulatory particle	orf19.9545	IPF25273.1	Contig20139:complement(10590..9349)
orf19.1994_1754	1393	0.134115	0.439613	0.312027	0.134115	0.872523	-1.1461	FLT down vs GRD	2.7782	1.07705	1.16432	1	orf19.1994_1754	, , orf19.9546 | IPF25236.1 | Contig20139:complement(12999..10954) , conserved hypothetical protein			conserved hypothetical protein	orf19.9546	IPF25236.1	Contig20139:complement(12999..10954)
orf19.1995_1190	868.875	0.273681	0.0811362	0.207563	0.273681	0.872743	-1.14581	FLT down vs GRD	1.38124	3.00053	1.87998	1	orf19.1995_1190	MNN5 , , orf19.9547 | IPF4742.2 | Contig20139:15155..17284 , alpha-1,2- mannosyltransferase	MNN5		alpha-1,2- mannosyltransferase	orf19.9547	IPF4742.2	Contig20139:15155..17284
orf19.1996_970	2846.13	0.0183898	0.291174	0.750564	0.0183898	0.60115	-1.66348	FLT down vs GRD	8.71003	1.49661	0.108277	1	orf19.1996_970	CHA2 , , orf19.9548 | IPF4749.2 | Contig20139:complement(20837..19776) , catabolic serine/threonine dehydratase	CHA2		catabolic serine/threonine dehydratase	orf19.9548	IPF4749.2	Contig20139:complement(20837..19776)
orf19.1998_2015	272.313	0.577345	0.3514	0.132332	0.577345	0.857051	-1.16679	FLT down vs GRD	0.337367	1.30294	2.80786	1	orf19.1998_2015	, , orf19.9549 | IPF25233.1 | Contig20139:complement(23906..21789) , hypothetical protein similar to Botulinum neurotoxin type B			hypothetical protein similar to Botulinum neurotoxin type B	orf19.9549	IPF25233.1	Contig20139:complement(23906..21789)
orf19.1999_437	828.125	0.053315	0.0790027	0.198054	0.053315	1.55333	1.55333	FLT up vs GRD	5.12967	3.0364	1.96999	1	orf19.1999_437	, , orf19.9550 | IPF18279.2 | Contig20139:complement(24881..24288) , hypothetical protein			hypothetical protein	orf19.9550	IPF18279.2	Contig20139:complement(24881..24288)
orf19.20_2399	1416	0.147339	0.42622	0.586766	0.147339	0.727378	-1.3748	FLT down vs GRD	2.57343	1.10806	0.320616	1	orf19.20_2399	RTS1 , , orf19.7691 | IPF27207.1 | Contig20014:complement(6975..4423) , potential regulatory subunit of protein serine/threonine phosphatase 2A	RTS1		potential regulatory subunit of protein serine/threonine phosphatase 2A	orf19.7691	IPF27207.1	Contig20014:complement(6975..4423)
orf19.200_1	2181.75	0.598664	0.240194	0.100819	0.598664	1.05934	1.05934	FLT up vs GRD	0.300273	1.70038	3.43818	1	orf19.200_1	THO1 , , orf19.7830 | IPF27118.1 | Contig20045:complement(6055..5474) , role in transcriptional regulation	THO1		role in transcriptional regulation	orf19.7830	IPF27118.1	Contig20045:complement(6055..5474)
orf19.2000_2189	470.625	0.14751	0.676762	0.0104026	0.14751	1.34985	1.34985	FLT up vs GRD	2.57095	0.639892	11.0811	1	orf19.2000_2189	CHL1 , , orf19.9551 | IPF25226.1 | Contig20139:25085..27613 , required for mitotic chromosome segregation and meiotic recombination	CHL1		required for mitotic chromosome segregation and meiotic recombination	orf19.9551	IPF25226.1	Contig20139:25085..27613
orf19.2001_483	601.375	0.189704	0.146228	0.0182547	0.189704	0.733811	-1.36275	FLT down vs GRD	2.05403	2.25908	8.73852	1	orf19.2001_483	, , orf19.9552 | IPF25291.1 | Contig20139:complement(28322..27606) , conserved hypothetical protein			conserved hypothetical protein	orf19.9552	IPF25291.1	Contig20139:complement(28322..27606)
orf19.2002_2532	945.75	0.072342	0.270017	0.876125	0.072342	0.657602	-1.52068	FLT down vs GRD	4.28074	1.57575	0.025904	1	orf19.2002_2532	NIC96 , , orf19.9553 | IPF4755.2 | Contig20139:complement(31475..28593) , nucleoporin	NIC96		nucleoporin	orf19.9553	IPF4755.2	Contig20139:complement(31475..28593)
orf19.2003_1259	890.813	0.186254	0.0629469	0.1664	0.186254	1.33636	1.33636	FLT up vs GRD	2.09023	3.35119	2.31779	1	orf19.2003_1259	HNM2 , , orf19.9554 | IPF4757.1 | Contig20139:33310..34926 , choline permease	HNM2		choline permease	orf19.9554	IPF4757.1	Contig20139:33310..34926
orf19.2005_2589	2252.44	0.020262	0.052427	0.273258	0.020262	0.557513	-1.79368	FLT down vs GRD	8.34041	3.61679	1.38387	1	orf19.2005_2589	REG1 , , orf19.9556 | IPF4764.2 | Contig20139:37983..41024 , RNA processing | negative regulator of glucose- repressible genes | regulatory subunit for protein phosphatase Glc7p	REG1		RNA processing | negative regulator of glucose- repressible genes | regulatory subunit for protein phosphatase Glc7p	orf19.9556	IPF4764.2	Contig20139:37983..41024
orf19.2006.1	8407.19	0.000256314	0.0332284	0.214609	0.000256314	2.20915	2.20915	FLT up vs GRD	38.5776	4.33087	1.81686	1	orf19.2006.1	COX17 , , orf19.9557.1 | IPF25343.1 | Contig20139:complement(43145..42828) , cytochrome c oxidase copper chaperone	COX17		cytochrome c oxidase copper chaperone	orf19.9557.1	IPF25343.1	Contig20139:complement(43145..42828)
orf19.2006_792	1438.75	0.646843	0.683652	0.0413061	0.646843	0.927719	-1.07791	FLT down vs GRD	0.226519	0.629168	5.89706	1	orf19.2006_792	EAP1 , EAP1 , orf19.9557 | IPF14686.2 | Contig20139:41773..42663 , Enhanced Adherence to Polystyrene | glycosylphosphatidylinositol-anchored cell wall protein involved in adhesion to human epithelial cells	EAP1	EAP1	Enhanced Adherence to Polystyrene | glycosylphosphatidylinositol-anchored cell wall protein involved in adhesion to human epithelial cells	orf19.9557	IPF14686.2	Contig20139:41773..42663
orf19.2007_2848	997.688	0.0556726	0.0109537	0.0248346	0.0556726	0.720153	-1.38859	FLT down vs GRD	5.00483	6.43275	7.59454	1	orf19.2007_2848	LUV1 , , orf19.9558 | IPF25347.1 | Contig20139:43769..46705 , Loss Upsets Vacuole	LUV1		Loss Upsets Vacuole	orf19.9558	IPF25347.1	Contig20139:43769..46705
orf19.2008_1056	785	0.0474684	0.0298094	0.408218	0.0474684	0.649103	-1.54059	FLT down vs GRD	5.47227	4.51259	0.761732	1	orf19.2008_1056	, , orf19.9559 | IPF25272.1 | Contig20139:complement(48037..46787) , eIF-2B translation initiation factor			eIF-2B translation initiation factor	orf19.9559	IPF25272.1	Contig20139:complement(48037..46787)
orf19.2009_1033	672.688	0.24822	0.0500546	0.334022	0.24822	0.864251	-1.15707	FLT down vs GRD	1.55105	3.68586	1.0568	1	orf19.2009_1033	PEX12 , , orf19.9560 | IPF18281.1 | Contig20139:complement(49727..48327) , C3HC4 zinc-binding integral peroxisomal membrane protein	PEX12		C3HC4 zinc-binding integral peroxisomal membrane protein	orf19.9560	IPF18281.1	Contig20139:complement(49727..48327)
orf19.201_2443	642.438	0.138274	0.00718966	0.524746	0.138274	1.26728	1.26728	FLT up vs GRD	2.71102	7.39128	0.442241	1	orf19.201_2443	CDC47 , , orf19.7832 | IPF27100.1 | Contig20045:complement(9930..7378) | orf19.7831 | IPF27124.1 | Contig20045:complement(6611..6435) , DNA helicase and DNA replication licensing factor	CDC47		DNA helicase and DNA replication licensing factor	orf19.7832	IPF27100.1	Contig20045:complement(9930..7378)
orf19.2010_41	25.6875	0.599274	0.00284027	0.701873	0.599274	0.737951	-1.3551	FLT down vs GRD	0.299254	9.89262	0.15747	1	orf19.2010_41	, , orf19.9561 | IPF20150.1 | Contig20139:50107..50502 , hypothetical protein			hypothetical protein	orf19.9561	IPF20150.1	Contig20139:50107..50502
orf19.2012_1806	1873.19	0.810574	0.347362	0.0421249	0.810574	1.04381	1.04381	FLT up vs GRD	0.061376	1.31472	5.83612	1	orf19.2012_1806	NOT3 , , orf19.9563 | IPF18023.2 | Contig20139:complement(52925..50592) , general negative regulator of transcription	NOT3		general negative regulator of transcription	orf19.9563	IPF18023.2	Contig20139:complement(52925..50592)
orf19.2013_1820	10791.1	0.0131413	0.252603	0.0205601	0.0131413	0.775714	-1.28914	FLT down vs GRD	10.066	1.64645	8.28552	1	orf19.2013_1820	KAR2 , , orf19.9564 | IPF15827.2 | Contig20139:complement(55595..53532) , dnaK/HSP70/ BiP family ATPase and chaperone involved in translocation of nascent polypeptides across the ER membrane	KAR2		dnaK/HSP70/ BiP family ATPase and chaperone involved in translocation of nascent polypeptides across the ER membrane	orf19.9564	IPF15827.2	Contig20139:complement(55595..53532)
orf19.2014_989	2972.63	0.13215	0.978355	0.190174	0.13215	0.790335	-1.26529	FLT down vs GRD	2.81092	0.13829	2.04916	1	orf19.2014_989	BCY1 , BCY1 , orf19.9565 | IPF19590.1 | Contig20139:56719..58098 , cAMP dependent protein kinase, regulatory subunit	BCY1	BCY1	cAMP dependent protein kinase, regulatory subunit	orf19.9565	IPF19590.1	Contig20139:56719..58098
orf19.2016_39	1667.38	0.00240801	0.00223796	0.0226591	0.00240801	1.43855	1.43855	FLT up vs GRD	19.0221	10.6327	7.92563	1	orf19.2016_39	erg28 , , orf19.9566 | IPF14810.2 | Contig20139:59478..59894 , transmembrane protein involved in ergosterol synthesis	erg28		transmembrane protein involved in ergosterol synthesis	orf19.9566	IPF14810.2	Contig20139:59478..59894
orf19.2017_811	851.188	0.894667	0.0170388	0.738083	0.894667	0.985655	-1.01455	FLT down vs GRD	0.0186793	5.52766	0.119891	1	orf19.2017_811	RPA49 , , orf19.9567 | IPF14813.2 | Contig20139:complement(61815..60634) , RNA polymerase I alpha subunit	RPA49		RNA polymerase I alpha subunit	orf19.9567	IPF14813.2	Contig20139:complement(61815..60634)
orf19.2018_82	294.375	0.944618	0.670845	0.244154	0.944618	1.03149	1.03149	FLT up vs GRD	0.00513759	0.649152	1.58046	1	orf19.2018_82	, , orf19.9568 | IPF14814.2 | Contig20139:62013..62462 , DnaJ homolog			DnaJ homolog	orf19.9568	IPF14814.2	Contig20139:62013..62462
orf19.2019_424	3061.31	0.15901	0.349045	0.55415	0.15901	1.2604	1.2604	FLT up vs GRD	2.41203	1.30979	0.38115	1	orf19.2019_424	MRPL16 , , orf19.9569 | IPF4102.2 | Contig20139:complement(64086..63433) , mitochondrial ribosome large subunit protein L16	MRPL16		mitochondrial ribosome large subunit protein L16	orf19.9569	IPF4102.2	Contig20139:complement(64086..63433)
orf19.2020_1017	4137.5	0.0390272	3.75e-06	0.756258	0.0390272	1.2722	1.2722	FLT up vs GRD	6.07511	60.92	0.103197	1	orf19.2020_1017	HXT6 , , orf19.9570 | IPF25253.1 | Contig20139:complement(66202..64550) , hexose transporter	HXT6		hexose transporter	orf19.9570	IPF25253.1	Contig20139:complement(66202..64550)
orf19.2021_492	6277.5	0.00126758	0.117915	0.161474	0.00126758	0.489077	-2.04467	FLT down vs GRD	23.5482	2.51909	2.37996	1	orf19.2021_492	HXT5 , , , hexose transporter	HXT5		hexose transporter
orf19.2023_36	4824	0.0320673	0.272765	0.214166	0.0320673	1.83053	1.83053	FLT up vs GRD	6.71286	1.56507	1.82075	1	orf19.2023_36	HXT3 , , orf19.9572 | IPF17561.3 | Contig20139:complement(71925..70432) , hexose transporter	HXT3		hexose transporter	orf19.9572	IPF17561.3	Contig20139:complement(71925..70432)
orf19.2024_102	233.125	0.793584	0.376845	0.295112	0.793584	0.92065	-1.08619	FLT down vs GRD	0.0731985	1.23199	1.25494	1	orf19.2024_102	, , orf19.9574 | IPF25333.1 | Contig20139:complement(73262..72915) , hypothetical protein			hypothetical protein	orf19.9574	IPF25333.1	Contig20139:complement(73262..72915)
orf19.2025_172	58.75	0.321806	0.0209942	0.938844	0.321806	0.657093	-1.52185	FLT down vs GRD	1.11516	5.1327	0.00626746	1	orf19.2025_172	, , , hypothetical protein			hypothetical protein
orf19.2026_1472	421.938	0.929692	0.817498	0.0871296	0.929692	1.0239	1.0239	FLT up vs GRD	0.00829005	0.428027	3.79852	1	orf19.2026_1472	UBP13 , , orf19.9575 | IPF19018.2 | Contig20139:75592..77694 , ubiquitin carboxyl-terminal hydrolase	UBP13		ubiquitin carboxyl-terminal hydrolase	orf19.9575	IPF19018.2	Contig20139:75592..77694
orf19.2028_402	5386.63	0.0353776	0.239728	0.944531	0.0353776	1.56179	1.56179	FLT up vs GRD	6.38967	1.70247	0.00515393	1	orf19.2028_402	MXR1 , , orf19.9576 | IPF4117.2 | Contig20139:77960..78517 , peptide methionine sulfoxide reductase	MXR1		peptide methionine sulfoxide reductase	orf19.9576	IPF4117.2	Contig20139:77960..78517
orf19.2029_957	1084.31	0.0545185	0.784049	0.407224	0.0545185	0.645793	-1.54848	FLT down vs GRD	5.06508	0.477815	0.765118	1	orf19.2029_957	RFC5 , , orf19.9577 | IPF4118.2 | Contig20139:78944..80032 , DNA replicationn factor C | leading strand elongation mismatch repair (ATPase)	RFC5		DNA replicationn factor C | leading strand elongation mismatch repair (ATPase)	orf19.9577	IPF4118.2	Contig20139:78944..80032
orf19.203_1031	2018.38	0.00214463	0.0526618	0.846975	0.00214463	2.09423	2.09423	FLT up vs GRD	19.7859	3.61017	0.0397339	1	orf19.203_1031	STB3 , , orf19.7833 | IPF27108.1 | Contig20045:complement(11777..10266) , Sin3p binding protein	STB3		Sin3p binding protein	orf19.7833	IPF27108.1	Contig20045:complement(11777..10266)
orf19.2030_124	4185.13	0.00931667	0.307214	0.479794	0.00931667	2.15676	2.15676	FLT up vs GRD	11.5816	1.44089	0.549294	1	orf19.2030_124	, , orf19.9578 | IPF4119.2 | Contig20139:complement(80566..80093) , hypothetical protein			hypothetical protein	orf19.9578	IPF4119.2	Contig20139:complement(80566..80093)
orf19.2031_179	582.063	0.745678	0.198064	0.259471	0.745678	1.15307	1.15307	FLT up vs GRD	0.112744	1.9113	1.4731	1	orf19.2031_179	VSP24 , , orf19.9579 | IPF19223.2 | Contig20139:81239..81862 , endosomal Vps protein complex subunit involved in secretion	VSP24		endosomal Vps protein complex subunit involved in secretion	orf19.9579	IPF19223.2	Contig20139:81239..81862
orf19.2032_434	42.3125	0.29002	0.382157	0.141988	0.29002	2.31671	2.31671	FLT up vs GRD	1.28372	1.21784	2.65324	1	orf19.2032_434	, , orf19.9580 | IPF25298.1 | Contig20139:complement(82536..81916) , hypothetical protein			hypothetical protein	orf19.9580	IPF25298.1	Contig20139:complement(82536..81916)
orf19.2033_592	389.125	0.377357	0.0537011	0.0285548	0.377357	0.806381	-1.24011	FLT down vs GRD	0.873421	3.58127	7.10561	1	orf19.2033_592	, , orf19.9581 | IPF25299.1 | Contig20139:complement(83469..82780) , hypothetical protein			hypothetical protein	orf19.9581	IPF25299.1	Contig20139:complement(83469..82780)
orf19.2034_445	172.813	0.175348	0.0451048	0.618625	0.175348	0.573984	-1.74221	FLT down vs GRD	2.21094	3.84393	0.268092	1	orf19.2034_445	, , orf19.9582 | IPF25300.1 | Contig20139:complement(84368..83679) , hypothetical protein			hypothetical protein	orf19.9582	IPF25300.1	Contig20139:complement(84368..83679)
orf19.2035_707	334.5	0.0988618	0.175722	0.69851	0.0988618	0.579912	-1.7244	FLT down vs GRD	3.48569	2.04601	0.161263	1	orf19.2035_707	, , orf19.9583 | IPF25280.1 | Contig20139:complement(85576..84578) , hypothetical protein			hypothetical protein	orf19.9583	IPF25280.1	Contig20139:complement(85576..84578)
orf19.2036_574	418.625	0.250277	0.598291	0.898828	0.250277	0.611563	-1.63515	FLT down vs GRD	1.53643	0.7675	0.0172233	1	orf19.2036_574	DDD1 , , orf19.9584 | IPF25277.1 | Contig20139:complement(86755..85676) , dimeric dihydrodiol dehydrogenase	DDD1		dimeric dihydrodiol dehydrogenase	orf19.9584	IPF25277.1	Contig20139:complement(86755..85676)
orf19.2037_299	584.875	0.531425	0.768217	0.26612	0.531425	0.781913	-1.27892	FLT down vs GRD	0.427786	0.501327	1.42924	1	orf19.2037_299	, , orf19.9585 | IPF25312.1 | Contig20139:complement(87851..87393) , hypothetical protein			hypothetical protein	orf19.9585	IPF25312.1	Contig20139:complement(87851..87393)
orf19.2038_882	206.75	0.00063346	0.262834	0.507818	0.00063346	0.188578	-5.30283	FLT down vs GRD	29.3381	1.60425	0.480498	1	orf19.2038_882	, , orf19.9586 | IPF25271.1 | Contig20139:88980..90236 , hypotheticalprotein			hypotheticalprotein	orf19.9586	IPF25271.1	Contig20139:88980..90236
orf19.2039_1078	1181.56	0.917459	0.067608	0.178345	0.917459	1.01281	1.01281	FLT up vs GRD	0.0114392	3.25044	2.17677	1	orf19.2039_1078	MSF1 , , orf19.9587 | IPF25267.1 | Contig20139:complement(91545..90274) , phenylalanyl-tRNA synthetase alpha subunit, mitochondrial	MSF1		phenylalanyl-tRNA synthetase alpha subunit, mitochondrial	orf19.9587	IPF25267.1	Contig20139:complement(91545..90274)
orf19.204_265	508.313	0.72705	0.342057	0.102139	0.72705	0.910938	-1.09777	FLT down vs GRD	0.130719	1.33042	3.40684	1	orf19.204_265	, , orf19.7834 | IPF27117.1 | Contig20045:14498..15121 , hypothetical protein			hypothetical protein	orf19.7834	IPF27117.1	Contig20045:14498..15121
orf19.2040_1654	672.938	0.918924	0.0213558	0.242602	0.918924	0.989665	-1.01044	FLT down vs GRD	0.0110349	5.10126	1.59187	1	orf19.2040_1654	TAH18 , , orf19.9588 | IPF25245.1 | Contig20139:complement(93602..91833) , NADPH-ferrihemoprotein reductase | nitric-oxide synthase	TAH18		NADPH-ferrihemoprotein reductase | nitric-oxide synthase	orf19.9588	IPF25245.1	Contig20139:complement(93602..91833)
orf19.2041_838	303.375	0.529519	0.27356	0.995034	0.529519	1.20939	1.20939	FLT up vs GRD	0.431875	1.56201	4.12e-05	1	orf19.2041_838	RSC4 , , orf19.9589 | IPF25241.1 | Contig20139:93993..95903 , remodels the structure of chromatin	RSC4		remodels the structure of chromatin	orf19.9589	IPF25241.1	Contig20139:93993..95903
orf19.2042_959	290	0.663473	0.12129	0.0510076	0.663473	0.858341	-1.16504	FLT down vs GRD	0.204042	2.48432	5.25887	1	orf19.2042_959	MSS1 , , orf19.9590 | IPF25257.1 | Contig20139:complement(97449..95986) , mitochondrial GTPase involved in translation	MSS1		mitochondrial GTPase involved in translation	orf19.9590	IPF25257.1	Contig20139:complement(97449..95986)
orf19.2043_789	456.063	0.531408	0.701495	0.230148	0.531408	0.863661	-1.15786	FLT down vs GRD	0.427822	0.601671	1.68726	1	orf19.2043_789	NBP352 , , orf19.9591 | IPF25285.1 | Contig20139:97635..98537 , conserved nucleotide binding protein	NBP352		conserved nucleotide binding protein	orf19.9591	IPF25285.1	Contig20139:97635..98537
orf19.2044_472	141	0.116608	0.370012	0.885617	0.116608	2.07054	2.07054	FLT up vs GRD	3.09441	1.25051	0.0220547	1	orf19.2044_472	, , orf19.9592 | IPF25252.1 | Contig20139:98512..100197 , hypothetical protein			hypothetical protein	orf19.9592	IPF25252.1	Contig20139:98512..100197
orf19.2045_834	1170.31	0.0028045	0.182341	0.100978	0.0028045	0.561667	-1.78042	FLT down vs GRD	18.0506	2.00406	3.43438	1	orf19.2045_834	HSD1 , , orf19.9593 | IPF25276.1 | Contig20139:100742..101779 , ER membrane protein	HSD1		ER membrane protein	orf19.9593	IPF25276.1	Contig20139:100742..101779
orf19.2046_508	576.688	0.0109769	0.123524	0.7994	0.0109769	2.46151	2.46151	FLT up vs GRD	10.8422	2.46194	0.0690257	1	orf19.2046_508	POT13 , , orf19.9594 | IPF25275.1 | Contig20139:complement(103191..102010) , acetyl-CoA C-acyltransferase, peroxisomal | fatty acid beta-oxidation	POT13		acetyl-CoA C-acyltransferase, peroxisomal | fatty acid beta-oxidation	orf19.9594	IPF25275.1	Contig20139:complement(103191..102010)
orf19.2047_286	1178.63	0.125163	0.691076	0.833942	0.125163	1.55742	1.55742	FLT up vs GRD	2.93262	0.617681	0.0469152	1	orf19.2047_286	, , orf19.9595 | IPF25302.1 | Contig20139:complement(104208..103582) , conserved hypothetical protein			conserved hypothetical protein	orf19.9595	IPF25302.1	Contig20139:complement(104208..103582)
orf19.2048_203	17345.5	2.35e-05	0.0266177	0.349807	2.35e-05	3.5529	3.5529	FLT up vs GRD	75.9	4.70722	0.98598	1	orf19.2048_203	, , orf19.9596 | IPF25325.1 | Contig20139:104901..105266 , hypothetical protein			hypothetical protein	orf19.9596	IPF25325.1	Contig20139:104901..105266
orf19.2049_624	1455.63	4.69e-05	0.312211	0.158517	4.69e-05	2.15572	2.15572	FLT up vs GRD	62.745	1.4242	2.41852	1	orf19.2049_624	, , orf19.9597 | IPF25289.1 | Contig20139:complement(106291..105437) , hypothetical protein			hypothetical protein	orf19.9597	IPF25289.1	Contig20139:complement(106291..105437)
orf19.2050_1527	6272.81	0.127005	0.0388659	0.00624493	0.127005	1.15729	1.15729	FLT up vs GRD	2.89968	4.07675	13.5213	1	orf19.2050_1527	TGL1 , , orf19.9598 | IPF25254.1 | Contig20139:107634..109256 , triglyceride lipase-cholesterol esterase	TGL1		triglyceride lipase-cholesterol esterase	orf19.9598	IPF25254.1	Contig20139:107634..109256
orf19.2051_2219	745.063	0.186765	0.140585	0.985856	0.186765	0.75409	-1.3261	FLT down vs GRD	2.08481	2.30576	0.000334476	1	orf19.2051_2219	, , orf19.9599 | IPF25219.1 | Contig20139:109823..112672 , hypothetical protein			hypothetical protein	orf19.9599	IPF25219.1	Contig20139:109823..112672
orf19.2054_1394	859.875	0.328976	0.00063205	0.173458	0.328976	1.21656	1.21656	FLT up vs GRD	1.08051	15.3834	2.23289	1	orf19.2054_1394	, , orf19.9601 | IPF25258.1 | Contig20139:113535..115091 , hypothetical zinc finger protein			hypothetical zinc finger protein	orf19.9601	IPF25258.1	Contig20139:113535..115091
orf19.2055_1203	854.188	0.564596	0.378103	0.935399	0.564596	1.12525	1.12525	FLT up vs GRD	0.360974	1.22862	0.00699537	1	orf19.2055_1203	NPL6 , , orf19.9602 | IPF25269.1 | Contig20139:complement(116560..115211) , nuclear protein localization factor	NPL6		nuclear protein localization factor	orf19.9602	IPF25269.1	Contig20139:complement(116560..115211)
orf19.2057_1820	1123.81	0.35014	0.287209	0.886144	0.35014	1.27081	1.27081	FLT up vs GRD	0.984538	1.51093	0.0218502	1	orf19.2057_1820	YTA12 , , orf19.9604 | IPF25224.1 | Contig20139:complement(119337..116797) , mitochondrial ATPase | proteolysis and chaperoning	YTA12		mitochondrial ATPase | proteolysis and chaperoning	orf19.9604	IPF25224.1	Contig20139:complement(119337..116797)
orf19.2059_626	156.75	0.961133	0.621082	0.0510782	0.961133	1.01734	1.01734	FLT up vs GRD	0.00252793	0.729246	5.25481	1	orf19.2059_626	, , orf19.9606 | IPF25287.1 | Contig20139:complement(121144..120209) , Endonuclease/Exonuclease/phosphatase family			Endonuclease/Exonuclease/phosphatase family	orf19.9606	IPF25287.1	Contig20139:complement(121144..120209)
orf19.206_2812	708.313	0.194455	0.388983	0.421632	0.194455	1.20813	1.20813	FLT up vs GRD	2.00561	1.19997	0.717336	1	orf19.206_2812	, , orf19.7836 | IPF12022.2 | Contig20045:20903..24049 , serine/threonine rich protein			serine/threonine rich protein	orf19.7836	IPF12022.2	Contig20045:20903..24049
orf19.2060_225	336.625	0.218155	0.156338	0.454285	0.218155	1.57788	1.57788	FLT up vs GRD	1.78617	2.18064	0.618454	1	orf19.2060_225	SOD5 , SOD5 , orf19.9607 | IPF25296.1 | Contig20139:124373..125059 , copper-zinc superoxide dismutase	SOD5	SOD5	copper-zinc superoxide dismutase	orf19.9607	IPF25296.1	Contig20139:124373..125059
orf19.2061_62	413.313	0.814838	0.250865	0.778144	0.814838	1.09814	1.09814	FLT up vs GRD	0.0585834	1.65381	0.0849251	1	orf19.2061_62	, , orf19.9608 | IPF25332.1 | Contig20139:125265..125618 , hypothetical protein			hypothetical protein	orf19.9608	IPF25332.1	Contig20139:125265..125618
orf19.2062_248	418.063	0.608483	0.113295	0.154944	0.608483	1.28645	1.28645	FLT up vs GRD	0.284144	2.5687	2.46642	1	orf19.2062_248	SOD4 , SOD4 , orf19.9609 | IPF25297.1 | Contig20139:127009..127707 , Cu/Zn superoxide dismutase	SOD4	SOD4	Cu/Zn superoxide dismutase	orf19.9609	IPF25297.1	Contig20139:127009..127707
orf19.2063_2881	185.688	0.0314348	0.0436418	0.489573	0.0314348	0.479895	-2.08379	FLT down vs GRD	6.77944	3.89479	0.524474	1	orf19.2063_2881	, , orf19.9610 | IPF25329.1 | Contig20139:complement(131586..127903) , conserved hypothetical protein			conserved hypothetical protein	orf19.9610	IPF25329.1	Contig20139:complement(131586..127903)
orf19.2064_3022	727.375	0.0138796	0.206635	0.437327	0.0138796	1.93474	1.93474	FLT up vs GRD	9.83728	1.86433	0.668256	1	orf19.2064_3022	, , orf19.9611 | IPF25337.1 | Contig20139:complement(134982..131659) , conserved hypothetical protein			conserved hypothetical protein	orf19.9611	IPF25337.1	Contig20139:complement(134982..131659)
orf19.2065_961	502.063	0.524451	0.333616	0.0756813	0.524451	1.13856	1.13856	FLT up vs GRD	0.442888	1.35599	4.16134	1	orf19.2065_961	DAL2 , , orf19.9612 | IPF25281.1 | Contig20139:135663..136691 , allantoinase | nitrogen and sulfur metabolism	DAL2		allantoinase | nitrogen and sulfur metabolism	orf19.9612	IPF25281.1	Contig20139:135663..136691
orf19.2066_512	528	0.80877	0.0258946	0.493358	0.80877	1.03681	1.03681	FLT up vs GRD	0.0625784	4.75536	0.515107	1	orf19.2066_512	, , orf19.9613 | IPF25283.1 | Contig20139:136796..137767 , conserved hypothetical membrane protein			conserved hypothetical membrane protein	orf19.9613	IPF25283.1	Contig20139:136796..137767
orf19.2067_9	3426.75	7.27e-05	0.143851	0.22295	7.27e-05	2.86415	2.86415	FLT up vs GRD	55.4901	2.27847	1.74574	1	orf19.2067_9	NFU1 , , orf19.9614 | IPF25292.1 | Contig20139:138899..139570 , nitrogen fixing protein	NFU1		nitrogen fixing protein	orf19.9614	IPF25292.1	Contig20139:138899..139570
orf19.2068_1469	445.375	0.238691	0.5634	0.220777	0.238691	0.505175	-1.97951	FLT down vs GRD	1.62108	0.828432	1.76391	1	orf19.2068_1469	, , orf19.9615 | IPF25256.1 | Contig20139:complement(141258..139678) , hypothetical protein			hypothetical protein	orf19.9615	IPF25256.1	Contig20139:complement(141258..139678)
orf19.2069_264	381.875	0.177108	0.0704529	0.981446	0.177108	1.68597	1.68597	FLT up vs GRD	2.19078	3.19306	0.000575633	1	orf19.2069_264	SMF3 , , orf19.9616 | IPF25259.1 | Contig20139:142282..143826 , vacuolar metal transporter	SMF3		vacuolar metal transporter	orf19.9616	IPF25259.1	Contig20139:142282..143826
orf19.207_3938	3672.44	8.36e-05	0.0984269	0.471773	8.36e-05	4.94514	4.94514	FLT up vs GRD	53.3471	2.74679	0.570333	1	orf19.207_3938	, , orf19.7838 | IPF15911.3 | Contig20045:26617..30108 , extremely serine rich protein			extremely serine rich protein	orf19.7838	IPF15911.3	Contig20045:26617..30108
orf19.2070_441	482.5	0.156594	0.00218449	0.231357	0.156594	1.35866	1.35866	FLT up vs GRD	2.44412	10.7103	1.67768	1	orf19.2070_441	RSC58 , , orf19.9617 | IPF25250.1 | Contig20139:complement(145507..143954) , remodels the structure of chromatin complex	RSC58		remodels the structure of chromatin complex	orf19.9617	IPF25250.1	Contig20139:complement(145507..143954)
orf19.2071_188	254.438	0.58719	0.693968	0.104885	0.58719	1.13769	1.13769	FLT up vs GRD	0.319876	0.613226	3.34324	1	orf19.2071_188	, , orf19.9618 | IPF25310.1 | Contig20139:complement(146519..146043) , hypothetical protein			hypothetical protein	orf19.9618	IPF25310.1	Contig20139:complement(146519..146043)
orf19.2072_1301	69.875	0.136908	0.121285	0.0467947	0.136908	1.41773	1.41773	FLT up vs GRD	2.73279	2.48437	5.51519	1	orf19.2072_1301	HNM1 , , orf19.9619 | IPF25249.1 | Contig20139:complement(148452..146743) , choline and nitrogen mustard permease	HNM1		choline and nitrogen mustard permease	orf19.9619	IPF25249.1	Contig20139:complement(148452..146743)
orf19.2073_1506	1548.19	0.077497	0.23049	0.265507	0.077497	1.40322	1.40322	FLT up vs GRD	4.09923	1.74488	1.43322	1	orf19.2073_1506	, , orf19.9620 | IPF25244.1 | Contig20139:complement(151604..149739) , membrane transporter, antimicrobial resistance			membrane transporter, antimicrobial resistance	orf19.9620	IPF25244.1	Contig20139:complement(151604..149739)
orf19.2074_219	507.563	0.00294798	0.174116	0.343856	0.00294798	2.92857	2.92857	FLT up vs GRD	17.7406	2.05648	1.0121	1	orf19.2074_219	, , orf19.9621 | IPF25336.1 | Contig20139:complement(151894..151550) , hypothetical protein			hypothetical protein	orf19.9621	IPF25336.1	Contig20139:complement(151894..151550)
orf19.2075_711	1706.94	0.0039296	0.812016	0.818956	0.0039296	1.76942	1.76942	FLT up vs GRD	16.0294	0.436217	0.055952	1	orf19.2075_711	DFG5 , , orf19.9622 | IPF25260.1 | Contig20139:complement(153548..152193) , filamentous growth, cell polarity and elongation	DFG5		filamentous growth, cell polarity and elongation	orf19.9622	IPF25260.1	Contig20139:complement(153548..152193)
orf19.2076_599	748.188	0.224539	0.0759229	0.141748	0.224539	0.702589	-1.42331	FLT down vs GRD	1.7326	3.09032	2.65692	1	orf19.2076_599	, , orf19.9623 | IPF25282.1 | Contig20139:complement(155435..154431) , conserved hypothetical protein			conserved hypothetical protein	orf19.9623	IPF25282.1	Contig20139:complement(155435..154431)
orf19.2077_1827	451.25	0.325397	0.00528292	0.489687	0.325397	0.883163	-1.13229	FLT down vs GRD	1.09767	8.15852	0.524192	1	orf19.2077_1827	, , orf19.9624 | IPF25229.1 | Contig20139:complement(158260..155753) , hypothetical zinc finger protein			hypothetical zinc finger protein	orf19.9624	IPF25229.1	Contig20139:complement(158260..155753)
orf19.2078_1895	588.625	0.717688	0.0211392	0.993069	0.717688	0.909171	-1.0999	FLT down vs GRD	0.14033	5.12001	8.03e-05	1	orf19.2078_1895	APM2 , , orf19.9625 | IPF25237.1 | Contig20139:complement(160787..158778) , clathrin-coat protein	APM2		clathrin-coat protein	orf19.9625	IPF25237.1	Contig20139:complement(160787..158778)
orf19.2079_185	3152.69	0.0442106	0.00779879	0.421791	0.0442106	1.61192	1.61192	FLT up vs GRD	5.68745	7.19833	0.716822	1	orf19.2079_185	PHH1 , , orf19.9626 | IPF25331.1 | Contig20139:161463..161807 , pterin-4a-carbinolamine dehydratase	PHH1		pterin-4a-carbinolamine dehydratase	orf19.9626	IPF25331.1	Contig20139:161463..161807
orf19.2081_3561	521.063	0.992917	0.0438297	0.661258	0.992917	1.00124	1.00124	FLT up vs GRD	8.39e-05	3.88814	0.206952	1	orf19.2081_3561	POM152 , , orf19.9628 | IPF25328.1 | Contig20139:complement(165713..161928) , nuclear pore membrane glycoprotein	POM152		nuclear pore membrane glycoprotein	orf19.9628	IPF25328.1	Contig20139:complement(165713..161928)
orf19.2082_862	25.375	0.735393	0.900173	0.289578	0.735393	1.20292	1.20292	FLT up vs GRD	0.122482	0.299178	1.28626	1	orf19.2082_862	, , orf19.9629 | IPF25266.1 | Contig20139:complement(167280..165973) , Gpi-anchored aspartic protease			Gpi-anchored aspartic protease	orf19.9629	IPF25266.1	Contig20139:complement(167280..165973)
orf19.2084_1709	2056.63	0.000423739	0.957778	0.200754	0.000423739	1.47314	1.47314	FLT up vs GRD	33.1864	0.190705	1.94384	1	orf19.2084_1709	CDH1 , , orf19.9631 | IPF25246.1 | Contig20139:168248..170041 , substrate-specific activator of APC-dependent proteolysis	CDH1		substrate-specific activator of APC-dependent proteolysis	orf19.9631	IPF25246.1	Contig20139:168248..170041
orf19.2087_989	374.75	0.00161563	0.00496244	0.418866	0.00161563	0.454028	-2.20251	FLT down vs GRD	21.7503	8.32158	0.7263	1	orf19.2087_989	SAS2 , , orf19.9634 | IPF25278.1 | Contig20139:complement(171151..170093) , zinc finger protein involved in silencing HMR	SAS2		zinc finger protein involved in silencing HMR	orf19.9634	IPF25278.1	Contig20139:complement(171151..170093)
orf19.2088_274	685.125	0.00507929	0.00176462	0.725206	0.00507929	0.639594	-1.56349	FLT down vs GRD	14.6034	11.4155	0.132581	1	orf19.2088_274	DPB4 , , orf19.9635 | IPF25294.1 | Contig20139:171391..172176 , subunit of DNA polymerase epsilon	DPB4		subunit of DNA polymerase epsilon	orf19.9635	IPF25294.1	Contig20139:171391..172176
orf19.2089_316	847.938	0.0899789	0.0214048	0.664842	0.0899789	0.690881	-1.44743	FLT down vs GRD	3.71771	5.09705	0.202255	1	orf19.2089_316	NYV1 , , orf19.9636 | IPF25290.1 | Contig20139:complement(172954..172208) , synaptobrevin (v-SNARE)	NYV1		synaptobrevin (v-SNARE)	orf19.9636	IPF25290.1	Contig20139:complement(172954..172208)
orf19.209_615	158.438	0.811202	0.704069	0.970571	0.811202	0.916745	-1.09082	FLT down vs GRD	0.0609605	0.597734	0.0014487	1	orf19.209_615	DFG10 , , orf19.7841 | IPF27115.1 | Contig20045:30878..31741 , possible roles in filamentous growth, cell polarity, and cellular elongation	DFG10		possible roles in filamentous growth, cell polarity, and cellular elongation	orf19.7841	IPF27115.1	Contig20045:30878..31741
orf19.2090_3337	836.688	0.00251586	0.12857	0.0257705	0.00251586	0.616351	-1.62245	FLT down vs GRD	18.739	2.41315	7.4632	1	orf19.2090_3337	ECM16 , , orf19.9637 | IPF25327.1 | Contig20139:173449..177240 , part of small (ribosomal) subunit (SSU) processosome (contains U3 snoRNA)	ECM16		part of small (ribosomal) subunit (SSU) processosome (contains U3 snoRNA)	orf19.9637	IPF25327.1	Contig20139:173449..177240
orf19.2091_463	2409.56	0.0273242	0.0198268	0.118626	0.0273242	0.681064	-1.46829	FLT down vs GRD	7.25796	5.23896	3.05487	1	orf19.2091_463	NUO24 , , orf19.9638 | IPF25295.1 | Contig20139:178575..179306 , subunit NUHM of NADH:Ubiquinone Oxidoreductase	NUO24		subunit NUHM of NADH:Ubiquinone Oxidoreductase	orf19.9638	IPF25295.1	Contig20139:178575..179306
orf19.2092_802	2635.75	0.012282	0.590885	0.156387	0.012282	1.36302	1.36302	FLT up vs GRD	10.3534	0.780181	2.4469	1	orf19.2092_802	STR3 , , orf19.9639 | IPF25274.1 | Contig20139:179675..180889 , cystathionine beta-lyase	STR3		cystathionine beta-lyase	orf19.9639	IPF25274.1	Contig20139:179675..180889
orf19.2093_1622	4074.13	0.493217	0.242379	0.0985294	0.493217	1.12844	1.12844	FLT up vs GRD	0.515454	1.69065	3.49388	1	orf19.2093_1622	RFA1 , , orf19.9640 | IPF25239.1 | Contig20139:181148..183022 , DNA replication factor A | DNA-damage repair	RFA1		DNA replication factor A | DNA-damage repair	orf19.9640	IPF25239.1	Contig20139:181148..183022
orf19.2094_2941	1178.13	0.434886	0.0167577	0.41055	0.434886	1.08411	1.08411	FLT up vs GRD	0.675696	5.56001	0.753844	1	orf19.2094_2941	PDR6 , , orf19.9641 | IPF25339.1 | Contig20139:complement(186312..183109) , member of the karyopherin-beta family with possible role in nuclear transport and regulation of pleiotropic drug resistance	PDR6		member of the karyopherin-beta family with possible role in nuclear transport and regulation of pleiotropic drug resistance	orf19.9641	IPF25339.1	Contig20139:complement(186312..183109)
orf19.2095_1859	2370.44	0.154229	0.133755	0.806358	0.154229	1.35885	1.35885	FLT up vs GRD	2.47618	2.36538	0.0642059	1	orf19.2095_1859	, , orf19.9642 | IPF25234.1 | Contig20139:186699..188798 , X-Pro aminopeptidase			X-Pro aminopeptidase	orf19.9642	IPF25234.1	Contig20139:186699..188798
orf19.2097_2420	634.188	0.229101	0.890611	0.731715	0.229101	1.44958	1.44958	FLT up vs GRD	1.69561	0.314962	0.126076	1	orf19.2097_2420	RAD5 , , orf19.9644 | IPF25340.1 | Contig20139:complement(192097..188843) , ATPase/DNA helicase	RAD5		ATPase/DNA helicase	orf19.9644	IPF25340.1	Contig20139:complement(192097..188843)
orf19.2098_693	3214.44	0.000753177	0.214881	0.619832	0.000753177	2.04814	2.04814	FLT up vs GRD	27.7973	1.82128	0.266221	1	orf19.2098_693	ARO8 , , orf19.9645 | IPF10616.3 | Contig20139:192799..194274 , aromatic amino acid aminotransferase	ARO8		aromatic amino acid aminotransferase	orf19.9645	IPF10616.3	Contig20139:192799..194274
orf19.2099_2291	1300.5	0.274892	0.075658	0.0309538	0.274892	1.14545	1.14545	FLT up vs GRD	1.37373	3.09509	6.83122	1	orf19.2099_2291	HIR1 , , orf19.9647 | IPF10625.2 | Contig20139:196838..199495 , involved in cell-cycle regulation of histone transcription	HIR1		involved in cell-cycle regulation of histone transcription	orf19.9647	IPF10625.2	Contig20139:196838..199495
orf19.21_126	295.5	0.0237249	0.0568269	0.863442	0.0237249	0.69737	-1.43396	FLT down vs GRD	7.75863	3.49836	0.0315464	1	orf19.21_126	, , orf19.7692 | IPF3866.2 | Contig20014:complement(9167..8580) , MPV17 homolog			MPV17 homolog	orf19.7692	IPF3866.2	Contig20014:complement(9167..8580)
orf19.210_1193	127.688	0.480434	0.0973623	0.276027	0.480434	0.756113	-1.32255	FLT down vs GRD	0.54764	2.76079	1.36673	1	orf19.210_1193	, , orf19.7842 | IPF27111.1 | Contig20045:31991..33370 , conserved hypothetical protein			conserved hypothetical protein	orf19.7842	IPF27111.1	Contig20045:31991..33370
orf19.2101_490	801.75	0.208658	0.871969	0.82374	0.208658	1.2835	1.2835	FLT up vs GRD	1.86999	0.344826	0.0529761	1	orf19.2101_490	SWF3 , , orf19.9649 | IPF25301.1 | Contig20139:complement(200123..199524) , coiled-coil membrane protein	SWF3		coiled-coil membrane protein	orf19.9649	IPF25301.1	Contig20139:complement(200123..199524)
orf19.2102_127	1441.88	0.0218982	0.325983	0.308293	0.0218982	1.50799	1.50799	FLT up vs GRD	8.05104	1.37973	1.18369	1	orf19.2102_127	CKB1 , , orf19.9650 | IPF25288.1 | Contig20139:200493..201374 , casein kinase II, regulatory (beta) subunit	CKB1		casein kinase II, regulatory (beta) subunit	orf19.9650	IPF25288.1	Contig20139:200493..201374
orf19.2103_365	198.813	0.0986938	0.666814	0.577241	0.0986938	2.06533	2.06533	FLT up vs GRD	3.48982	0.65549	0.337556	1	orf19.2103_365	, , orf19.9651 | IPF25309.1 | Contig20139:complement(201129..200602) , hypothetical protein			hypothetical protein	orf19.9651	IPF25309.1	Contig20139:complement(201129..200602)
orf19.2104_525	963.938	0.783681	0.0704046	0.271492	0.783681	0.922087	-1.0845	FLT down vs GRD	0.0806108	3.19401	1.39494	1	orf19.2104_525	JAC1 , , orf19.9652 | IPF18422.2 | Contig20139:complement(201977..201471) , molecular chaperone | may be involved in assembly/maturation of mitochondrial iron-sulfur proteins	JAC1		molecular chaperone | may be involved in assembly/maturation of mitochondrial iron-sulfur proteins	orf19.9652	IPF18422.2	Contig20139:complement(201977..201471)
orf19.2105_550	672.563	0.000578996	0.268172	0.111199	0.000578996	2.13046	2.13046	FLT up vs GRD	30.1651	1.58298	3.20495	1	orf19.2105_550	CWC24 , , orf19.9653 | IPF25303.1 | Contig20139:202391..202894 , zinc finger protein	CWC24		zinc finger protein	orf19.9653	IPF25303.1	Contig20139:202391..202894
orf19.2106_314	825.875	0.0239447	0.467061	0.245216	0.0239447	1.927	1.927	FLT up vs GRD	7.72537	1.01646	1.57271	1	orf19.2106_314	, , orf19.9654 | IPF25293.1 | Contig20139:202965..203672 , conserved hypothetical membrane protein			conserved hypothetical membrane protein	orf19.9654	IPF25293.1	Contig20139:202965..203672
orf19.2107.1	21974.8	5.61e-07	7.83e-05	0.375399	5.61e-07	2.09803	2.09803	FLT up vs GRD	204.196	27.3845	0.880993	1	orf19.2107.1	STF2 , , orf19.9655.1 | IPF25220.1 | Contig20139:complement(205300..205031) , ATP synthase regulatory factor	STF2		ATP synthase regulatory factor	orf19.9655.1	IPF25220.1	Contig20139:complement(205300..205031)
orf19.2107_813	2354.69	0.881784	0.142589	0.55041	0.881784	1.02948	1.02948	FLT up vs GRD	0.0235708	2.28893	0.388563	1	orf19.2107_813	MUQ1 , , orf19.9655 | IPF25279.1 | Contig20139:203917..204969 , choline phosphate cytidylyltransferase | phosphoethanolamine cytidylyltransferase	MUQ1		choline phosphate cytidylyltransferase | phosphoethanolamine cytidylyltransferase	orf19.9655	IPF25279.1	Contig20139:203917..204969
orf19.2108_286	82.125	0.262405	0.342098	0.179609	0.262405	1.68575	1.68575	FLT up vs GRD	1.45355	1.3303	2.16259	1	orf19.2108_286	SOD6 , SOD6 , orf19.9656 | IPF25284.1 | Contig20139:206211..207014 , Cu/Zn superoxide dismutase	SOD6	SOD6	Cu/Zn superoxide dismutase	orf19.9656	IPF25284.1	Contig20139:206211..207014
orf19.211_442	2663	1.27e-06	0.00290859	0.207508	1.27e-06	2.98635	2.98635	FLT up vs GRD	165.129	9.82118	1.88049	1	orf19.211_442	, , orf19.7843 | IPF27119.1 | Contig20045:complement(33881..33321) , probable zinc finger similar to bacterial Ada DNA-protein-cysteine methyltransferase			probable zinc finger similar to bacterial Ada DNA-protein-cysteine methyltransferase	orf19.7843	IPF27119.1	Contig20045:complement(33881..33321)
orf19.2110_1126	469.875	0.994888	0.0840944	0.0326592	0.994888	1.00113	1.00113	FLT up vs GRD	4.37e-05	2.95266	6.65204	1	orf19.2110_1126	ATE1 , , orf19.9658 | IPF25264.1 | Contig20139:complement(208476..207088) , arginyl tRNA transferase	ATE1		arginyl tRNA transferase	orf19.9658	IPF25264.1	Contig20139:complement(208476..207088)
orf19.2111.2	19384.1	0.432551	0.000620413	0.0848575	0.432551	0.942582	-1.06092	FLT down vs GRD	0.682875	15.465	3.86544	1	orf19.2111.2	RPL38 , , orf19.9659.2 | IPF25223.1 | Contig20139:complement(210085..209849) , ribosomal protein L38	RPL38		ribosomal protein L38	orf19.9659.2	IPF25223.1	Contig20139:complement(210085..209849)
orf19.2111_673	1878.69	0.0353546	0.124114	0.456332	0.0353546	1.34232	1.34232	FLT up vs GRD	6.39178	2.45611	0.612655	1	orf19.2111_673	TFG2 , , orf19.9659 | IPF25270.1 | Contig20139:208600..209745 , RNA Polymerase II transcription initiation factor TFIIF middle subunit	TFG2		RNA Polymerase II transcription initiation factor TFIIF middle subunit	orf19.9659	IPF25270.1	Contig20139:208600..209745
orf19.2112_565	930.438	0.44583	0.285265	0.051584	0.44583	1.12766	1.12766	FLT up vs GRD	0.642881	1.51803	5.22591	1	orf19.2112_565	PRP18 , , orf19.9660 | IPF18423.2 | Contig20139:complement(211071..210253) , U5 small nuclear ribonucleoprotein (snRNA) particle protein	PRP18		U5 small nuclear ribonucleoprotein (snRNA) particle protein	orf19.9660	IPF18423.2	Contig20139:complement(211071..210253)
orf19.2113_1175	1338.5	0.682938	0.250164	0.336801	0.682938	1.08194	1.08194	FLT up vs GRD	0.179532	1.6568	1.04397	1	orf19.2113_1175	, , orf19.9661 | IPF25263.1 | Contig20139:211234..212613 , integral peroxisomal membrane protein			integral peroxisomal membrane protein	orf19.9661	IPF25263.1	Contig20139:211234..212613
orf19.2114_582	1325.75	0.405621	0.776168	0.945284	0.405621	0.847105	-1.18049	FLT down vs GRD	0.770603	0.489515	0.0050146	1	orf19.2114_582	URO1 , , orf19.9662 | IPF25286.1 | Contig20139:212826..213737 , peroxisomal urate oxidase | uricase	URO1		peroxisomal urate oxidase | uricase	orf19.9662	IPF25286.1	Contig20139:212826..213737
orf19.2115_621	1663.44	0.957564	0.0750096	0.100808	0.957564	0.995373	-1.00465	FLT down vs GRD	0.00301413	3.10683	3.43845	1	orf19.2115_621	, , orf19.9663 | IPF10325.2 | Contig20139:213835..215139 , molybdopterin-converting factor			molybdopterin-converting factor	orf19.9663	IPF10325.2	Contig20139:213835..215139
orf19.2116_412	3383.69	0.00372878	0.0406215	0.41173	0.00372878	1.72189	1.72189	FLT up vs GRD	16.3325	4.0068	0.749881	1	orf19.2116_412	NAT2 , , orf19.9664 | IPF10323.1 | Contig20139:215219..215857 , N-acetyltransferase for N- terminal methionine	NAT2		N-acetyltransferase for N- terminal methionine	orf19.9664	IPF10323.1	Contig20139:215219..215857
orf19.2117_281	397.125	0.0633518	0.0591544	0.988894	0.0633518	1.40885	1.40885	FLT up vs GRD	4.64091	3.44019	0.000206227	1	orf19.2117_281	LEU5 , , orf19.9665 | IPF10322.1 | Contig20139:complement(217109..215883) , mitochondrial carrier protein	LEU5		mitochondrial carrier protein	orf19.9665	IPF10322.1	Contig20139:complement(217109..215883)
orf19.2119_917	1805	0.522967	0.145893	0.585424	0.522967	0.928967	-1.07646	FLT down vs GRD	0.446151	2.26179	0.322967	1	orf19.2119_917	NDT80 , , orf19.9667 | IPF25251.1 | Contig20139:complement(219142..217445) , meiosis-specific protein for exit from pachytene	NDT80		meiosis-specific protein for exit from pachytene	orf19.9667	IPF25251.1	Contig20139:complement(219142..217445)
orf19.212_561	1039.56	0.0504813	0.00371222	0.0110603	0.0504813	1.49906	1.49906	FLT up vs GRD	5.28939	9.11174	10.8088	1	orf19.212_561	VPS28 , , orf19.7844 | IPF27116.1 | Contig20045:34159..34905 , endosome to vacuole transport factor	VPS28		endosome to vacuole transport factor	orf19.7844	IPF27116.1	Contig20045:34159..34905
orf19.2120_95	98.375	0.6907	0.00464184	0.996751	0.6907	1.07371	1.07371	FLT up vs GRD	0.170281	8.49839	1.77e-05	1	orf19.2120_95	, , orf19.9668 | IPF25319.1 | Contig20139:219086..219502 , hypothetical protein			hypothetical protein	orf19.9668	IPF25319.1	Contig20139:219086..219502
orf19.2121_1518	12249.8	0.008374	0.4011	0.218076	0.008374	3.68141	3.68141	FLT up vs GRD	12.0795	1.16907	1.78685	1	orf19.2121_1518	ALS4 , , orf19.9670 | IPF25194.1 | Contig20140:3314..3820 | orf19.9669 | IPF25217.1 | Contig20140:3..3206 , agglutinin like protein 4	ALS4		agglutinin like protein 4	orf19.9670	IPF25194.1	Contig20140:3314..3820
orf19.2124_620	936.125	0.344829	0.422303	0.693177	0.344829	0.733119	-1.36404	FLT down vs GRD	1.00778	1.11731	0.167389	1	orf19.2124_620	, , orf19.9672 | IPF16259.1 | Contig20140:complement(10359..9289) , putative dehydrogenase			putative dehydrogenase	orf19.9672	IPF16259.1	Contig20140:complement(10359..9289)
orf19.2125.1	964.563	0.596321	0.445105	0.694195	0.596321	0.880968	-1.13511	FLT down vs GRD	0.304209	1.06463	0.166209	1	orf19.2125.1	, , , retroviral pol			retroviral pol
orf19.2125_288	14548.3	1.28e-06	0.47129	0.648916	1.28e-06	2.81987	2.81987	FLT up vs GRD	164.963	1.00745	0.223637	1	orf19.2125_288	, , orf19.9673 | IPF16257.1 | Contig20140:10907..11263 , hypothetical protein			hypothetical protein	orf19.9673	IPF16257.1	Contig20140:10907..11263
orf19.2127_58	564.563	0.0160936	0.128142	0.320828	0.0160936	1.38488	1.38488	FLT up vs GRD	9.23406	2.4172	1.11998	1	orf19.2127_58	, , orf19.9674 | IPF25189.1 | Contig20140:11533..12600 , hypothetical protein			hypothetical protein	orf19.9674	IPF25189.1	Contig20140:11533..12600
orf19.2128_759	718.313	0.216976	0.0026905	0.504864	0.216976	1.16859	1.16859	FLT up vs GRD	1.7963	10.057	0.48742	1	orf19.2128_759	YLF2 , , orf19.9675 | IPF25188.1 | Contig20140:15193..16278 , putative GTP-binding protein	YLF2		putative GTP-binding protein	orf19.9675	IPF25188.1	Contig20140:15193..16278
orf19.2129_2363	535.25	0.873899	0.970519	0.433011	0.873899	0.945192	-1.05799	FLT down vs GRD	0.0268529	0.16008	0.681456	1	orf19.2129_2363	SPO71 , , orf19.9676 | IPF25177.1 | Contig20140:complement(15112..12584) , protein involved in spore wall formation	SPO71		protein involved in spore wall formation	orf19.9676	IPF25177.1	Contig20140:complement(15112..12584)
orf19.213_90	3786.56	0.125003	0.63192	0.28397	0.125003	1.2881	1.2881	FLT up vs GRD	2.93551	0.711428	1.31889	1	orf19.213_90	RPN12 , , orf19.7845 | IPF27114.1 | Contig20045:complement(35787..34954) , 26S proteasome regulatory subunit	RPN12		26S proteasome regulatory subunit	orf19.7845	IPF27114.1	Contig20045:complement(35787..34954)
orf19.2131_1846	2223.38	3.69e-05	0.05504	0.00650218	3.69e-05	1.86994	1.86994	FLT up vs GRD	67.0553	3.54505	13.3164	1	orf19.2131_1846	TUL1 , , orf19.9678 | IPF25179.1 | Contig20140:complement(18988..16658) , transmembrane ubiquitin ligase	TUL1		transmembrane ubiquitin ligase	orf19.9678	IPF25179.1	Contig20140:complement(18988..16658)
orf19.2132_637	2768	0.988392	0.461746	0.0662745	0.988392	1.00231	1.00231	FLT up vs GRD	0.000225279	1.02791	4.51697	1	orf19.2132_637	, , orf19.9679 | IPF25191.1 | Contig20140:complement(19772..19071) , hypothetical protein			hypothetical protein	orf19.9679	IPF25191.1	Contig20140:complement(19772..19071)
orf19.2133_31	88.4375	0.685784	0.715407	0.800604	0.685784	1.38635	1.38635	FLT up vs GRD	0.176106	0.580472	0.0681785	1	orf19.2133_31	LIP4 , LIP4 , orf19.9680 | IPF19830.2 | Contig20140:21559..22938 , secreted lipase	LIP4	LIP4	secreted lipase	orf19.9680	IPF19830.2	Contig20140:21559..22938
orf19.2135_2506	153.938	0.357139	0.317185	0.724385	0.357139	1.37702	1.37702	FLT up vs GRD	0.954717	1.40789	0.133415	1	orf19.2135_2506	TAF2 , , orf19.9683 | IPF25185.1 | Contig20140:complement(27776..26178) | orf19.9682 | IPF25176.1 | Contig20140:complement(26251..23498) , component of TFIID complex	TAF2		component of TFIID complex	orf19.9683	IPF25185.1	Contig20140:complement(27776..26178)
orf19.2137_911	593.688	0.11871	0.355952	0.816717	0.11871	1.62412	1.62412	FLT up vs GRD	3.05324	1.28984	0.0573751	1	orf19.2137_911	, , orf19.9684 | IPF25186.1 | Contig20140:complement(29459..27879) , conserved hypothetical protein			conserved hypothetical protein	orf19.9684	IPF25186.1	Contig20140:complement(29459..27879)
orf19.2138_2562	4815.56	0.271794	0.187897	0.162057	0.271794	1.12572	1.12572	FLT up vs GRD	1.39304	1.97023	2.37248	1	orf19.2138_2562	ILS1 , , orf19.9685 | IPF25214.1 | Contig20140:29502..32768 , isoleucyl-tRNA synthetase	ILS1		isoleucyl-tRNA synthetase	orf19.9685	IPF25214.1	Contig20140:29502..32768
orf19.2143_2372	666.25	0.242742	0.0620526	0.463901	0.242742	0.758538	-1.31833	FLT down vs GRD	1.59083	3.37157	0.591602	1	orf19.2143_2372	, , orf19.9690 | IPF25218.1 | Contig20140:complement(35584..32777) , conserved hypothetical protein			conserved hypothetical protein	orf19.9690	IPF25218.1	Contig20140:complement(35584..32777)
orf19.2146_1011	1057.13	0.307274	0.435963	0.503924	0.307274	0.848163	-1.17902	FLT down vs GRD	1.18904	1.0854	0.489639	1	orf19.2146_1011	HAT2 , , orf19.9693 | IPF25187.1 | Contig20140:complement(37445..36297) , histone acetyltransferase subunit	HAT2		histone acetyltransferase subunit	orf19.9693	IPF25187.1	Contig20140:complement(37445..36297)
orf19.2149_691	162	0.445279	0.455747	0.786208	0.445279	1.43286	1.43286	FLT up vs GRD	0.644501	1.04098	0.0786827	1	orf19.2149_691	, , orf19.9696 | IPF25180.1 | Contig20140:complement(39784..37511) , conserved hypothetical protein			conserved hypothetical protein	orf19.9696	IPF25180.1	Contig20140:complement(39784..37511)
orf19.215_469	137.188	0.301463	0.369046	0.068922	0.301463	1.36696	1.36696	FLT up vs GRD	1.22004	1.25316	4.41061	1	orf19.215_469	AVO2 , , orf19.7847 | IPF27103.1 | Contig20045:complement(38169..36178) , TOR2 binding protein	AVO2		TOR2 binding protein	orf19.7847	IPF27103.1	Contig20045:complement(38169..36178)
orf19.2150_6	2365.63	0.0188099	0.0607356	0.84042	0.0188099	1.56265	1.56265	FLT up vs GRD	8.62306	3.40225	0.0432678	1	orf19.2150_6	, , orf19.9697 | IPF25190.1 | Contig20140:40004..40930 , putative electron carrier			putative electron carrier	orf19.9697	IPF25190.1	Contig20140:40004..40930
orf19.2151_1217	1303.38	0.0790186	0.0872056	0.11379	0.0790186	1.32869	1.32869	FLT up vs GRD	4.04861	2.9045	3.15114	1	orf19.2151_1217	SEY1 , , orf19.9698 | IPF25181.1 | Contig20140:41029..43401 , putative stress-related vesicular transport protein	SEY1		putative stress-related vesicular transport protein	orf19.9698	IPF25181.1	Contig20140:41029..43401
orf19.2154_375	776.438	0.0307556	0.280895	0.832598	0.0307556	1.44786	1.44786	FLT up vs GRD	6.85286	1.5342	0.0476915	1	orf19.2154_375	HXK1 , , orf19.9701 | IPF2721.2 | Contig20140:43547..45028 , hexokinase I	HXK1		hexokinase I	orf19.9701	IPF2721.2	Contig20140:43547..45028
orf19.2156_473	828.5	0.000788903	0.976953	0.867535	0.000788903	1.92031	1.92031	FLT up vs GRD	27.3961	0.14242	0.0296627	1	orf19.2156_473	NAG1 , , orf19.9703 | IPF2719.1 | Contig20140:complement(46017..45271) , glucosamine-6-phosphate deaminase	NAG1		glucosamine-6-phosphate deaminase	orf19.9703	IPF2719.1	Contig20140:complement(46017..45271)
orf19.2157_168	634.25	8.79e-05	0.108248	0.66439	8.79e-05	4.75526	4.75526	FLT up vs GRD	52.5904	2.6258	0.202845	1	orf19.2157_168	NAG2 , , orf19.9704 | IPF20073.1 | Contig20140:46258..47499 , N-acetylglucosamine-6-phosphate deacetylase	NAG2		N-acetylglucosamine-6-phosphate deacetylase	orf19.9704	IPF20073.1	Contig20140:46258..47499
orf19.2158_419	130.25	0.0314521	0.363641	0.136264	0.0314521	2.5237	2.5237	FLT up vs GRD	6.77759	1.26813	2.74315	1	orf19.2158_419	NAG3 , , , related to MDR family transporters	NAG3		related to MDR family transporters
orf19.216_934	801.25	0.0232574	0.410105	0.81923	0.0232574	1.97077	1.97077	FLT up vs GRD	7.83069	1.14674	0.0557797	1	orf19.216_934	, , orf19.7848 | IPF13203.3 | Contig20045:39243..41093 , conserved hypothetical protein			conserved hypothetical protein	orf19.7848	IPF13203.3	Contig20045:39243..41093
orf19.2160_0	38.4375	0.986589	0.497195	0.260927	0.986589	0.967259	-1.03385	FLT down vs GRD	0.000300708	0.953937	1.46336	1	orf19.2160_0	NAG4 , , orf19.9706 | IPF2710.1 | Contig20140:complement(51146..49401) , membrane transporter	NAG4		membrane transporter	orf19.9706	IPF2710.1	Contig20140:complement(51146..49401)
orf19.2163_111	313.125	0.152726	0.859211	0.536933	0.152726	2.06092	2.06092	FLT up vs GRD	2.4969	0.364738	0.416127	1	orf19.2163_111	, , orf19.9709 | IPF25178.1 | Contig20140:52851..55364 , conserved hypothetical protein			conserved hypothetical protein	orf19.9709	IPF25178.1	Contig20140:52851..55364
orf19.2164_3229	775.063	0.079348	0.209938	0.196132	0.079348	0.600027	-1.66659	FLT down vs GRD	4.03782	1.84685	1.9889	1	orf19.2164_3229	, , orf19.9710 | IPF25169.1 | Contig20141:complement(4381..1025) , reverse transcriptase (incomplete)			reverse transcriptase (incomplete)	orf19.9710	IPF25169.1	Contig20141:complement(4381..1025)
orf19.2165_370	1264.31	0.0644979	0.356221	0.696302	0.0644979	0.741304	-1.34897	FLT down vs GRD	4.59145	1.28907	0.163784	1	orf19.2165_370	, , orf19.9711 | IPF25145.1 | Contig20141:complement(7544..6708) , conserved hypothetical protein			conserved hypothetical protein	orf19.9711	IPF25145.1	Contig20141:complement(7544..6708)
orf19.2166_411	776.813	0.0307329	0.785928	0.958973	0.0307329	0.564459	-1.77161	FLT down vs GRD	6.85535	0.475024	0.002817	1	orf19.2166_411	VMA5 , , orf19.9712 | IPF13718.3 | Contig20141:complement(9434..8268) , vacuolar ATPase domain subunit C	VMA5		vacuolar ATPase domain subunit C	orf19.9712	IPF13718.3	Contig20141:complement(9434..8268)
orf19.2167_927	1574.44	0.0732668	0.887384	0.487535	0.0732668	0.605932	-1.65035	FLT down vs GRD	4.24697	0.320209	0.529574	1	orf19.2167_927	, , orf19.9713 | IPF25129.1 | Contig20141:10162..11514 , conserved hypothetical protein			conserved hypothetical protein	orf19.9713	IPF25129.1	Contig20141:10162..11514
orf19.2168.3	10501.9	0.0165906	0.0112676	0.320226	0.0165906	0.809038	-1.23604	FLT down vs GRD	9.11295	6.37191	1.12296	1	orf19.2168.3	YOP1 , , orf19.9714.3 | IPF13710.3 | Contig20141:14596..15066 , involved in membrane traffic	YOP1		involved in membrane traffic	orf19.9714.3	IPF13710.3	Contig20141:14596..15066
orf19.2168_85	139.375	0.415427	0.0925335	0.314679	0.415427	0.646385	-1.54707	FLT down vs GRD	0.737579	2.82671	1.15076	1	orf19.2168_85	, , orf19.9714 | IPF25127.1 | Contig20141:complement(13135..11762) , hypothetical membrane protein			hypothetical membrane protein	orf19.9714	IPF25127.1	Contig20141:complement(13135..11762)
orf19.2169_473	158.5	0.501474	0.099221	0.0220814	0.501474	0.93631	-1.06802	FLT down vs GRD	0.495456	2.73647	8.02034	1	orf19.2169_473	, , orf19.9715 | IPF16181.3 | Contig20141:complement(15904..15215) , hypothetical protein			hypothetical protein	orf19.9715	IPF16181.3	Contig20141:complement(15904..15215)
orf19.217_818	34.6875	0.377771	0.199765	0.0277275	0.377771	0.72401	-1.3812	FLT down vs GRD	0.871825	1.90178	7.20709	1	orf19.217_818	, , orf19.7849 | IPF27112.1 | Contig20045:complement(44849..43710) , zinc finger protein			zinc finger protein	orf19.7849	IPF27112.1	Contig20045:complement(44849..43710)
orf19.2170_2566	3687.25	0.000455605	0.545659	0.10175	0.000455605	0.441777	-2.26359	FLT down vs GRD	32.4634	0.860674	3.41601	1	orf19.2170_2566	, , orf19.9716 | IPF25099.1 | Contig20141:17947..20730 , membrane transporter			membrane transporter	orf19.9716	IPF25099.1	Contig20141:17947..20730
orf19.2172_899	2562.94	0.391819	0.807648	0.745611	0.391819	0.709713	-1.40902	FLT down vs GRD	0.819334	0.442732	0.112806	1	orf19.2172_899	ARA1 , , orf19.9718 | IPF25141.1 | Contig20141:complement(22102..21122) , D-arabinose dehydrogenase	ARA1		D-arabinose dehydrogenase	orf19.9718	IPF25141.1	Contig20141:complement(22102..21122)
orf19.2173_983	1558.81	0.219455	0.00787054	0.513273	0.219455	0.845235	-1.1831	FLT down vs GRD	1.77509	7.17685	0.467911	1	orf19.2173_983	MAF1 , , orf19.9719 | IPF25133.1 | Contig20141:complement(23835..22669) , nuclear-cytoplasmic transport | negative effector of Pol III synthesis	MAF1		nuclear-cytoplasmic transport | negative effector of Pol III synthesis	orf19.9719	IPF25133.1	Contig20141:complement(23835..22669)
orf19.2174_1434	813	0.539997	0.289236	0.0807626	0.539997	1.08473	1.08473	FLT up vs GRD	0.40974	1.50358	3.99212	1	orf19.2174_1434	RAD57 , , orf19.9720 | IPF25120.1 | Contig20141:complement(25964..24429) , DNA-repair | RecA homolog	RAD57		DNA-repair | RecA homolog	orf19.9720	IPF25120.1	Contig20141:complement(25964..24429)
orf19.2175_888	1189.88	0.207477	0.0687463	0.171555	0.207477	1.18257	1.18257	FLT up vs GRD	1.88078	3.22713	2.25531	1	orf19.2175_888	, , orf19.9721 | IPF25135.1 | Contig20141:complement(27298..26195) , oxidoreductase similar to mammalian Apoptosis Inducing Factor			oxidoreductase similar to mammalian Apoptosis Inducing Factor	orf19.9721	IPF25135.1	Contig20141:complement(27298..26195)
orf19.2176_143	245.063	0.0288473	0.0254667	0.102848	0.0288473	1.71557	1.71557	FLT up vs GRD	7.07062	4.78464	3.39019	1	orf19.2176_143	, , orf19.9722 | IPF25139.1 | Contig20141:28188..29225 , hydroxyacid dehydrogenase			hydroxyacid dehydrogenase	orf19.9722	IPF25139.1	Contig20141:28188..29225
orf19.2177_252	54.125	0.182156	0.173781	0.719688	0.182156	2.22323	2.22323	FLT up vs GRD	2.13444	2.05867	0.138244	1	orf19.2177_252	, , orf19.9723 | IPF25150.1 | Contig20141:complement(28805..28221) , hypothetical protein			hypothetical protein	orf19.9723	IPF25150.1	Contig20141:complement(28805..28221)
orf19.2178_874	1262.06	0.0550987	0.251672	0.222998	0.0550987	0.586879	-1.70393	FLT down vs GRD	5.03459	1.65038	1.74534	1	orf19.2178_874	MRS4 , , orf19.9724 | IPF25142.1 | Contig20141:30354..31331 , RNA splicing protein and member of the mitochondrial carrier family (MCF)	MRS4		RNA splicing protein and member of the mitochondrial carrier family (MCF)	orf19.9724	IPF25142.1	Contig20141:30354..31331
orf19.2179.2	20678.1	0.556211	0.148	0.419545	0.556211	1.15338	1.15338	FLT up vs GRD	0.377107	2.24487	0.724088	1	orf19.2179.2	RPS10 , , orf19.9725.2 | IPF25168.1 | Contig20141:36415..36756 , ribosomal protein S10A	RPS10		ribosomal protein S10A	orf19.9725.2	IPF25168.1	Contig20141:36415..36756
orf19.2179_1006	595.5	0.00594383	0.034988	0.0401487	0.00594383	2.09808	2.09808	FLT up vs GRD	13.775	4.24616	5.98588	1	orf19.2179_1006	ARN1 , ARN1 , orf19.9725 | IPF25111.1 | Contig20141:33813..35651 , iron-siderophore transporter	ARN1	ARN1	iron-siderophore transporter	orf19.9725	IPF25111.1	Contig20141:33813..35651
orf19.218_203	248.938	0.622702	0.638006	0.840672	0.622702	1.17964	1.17964	FLT up vs GRD	0.261807	0.701522	0.0431288	1	orf19.218_203	, , orf19.7850 | IPF27125.1 | Contig20045:complement(46758..46411) , hypothetical protein			hypothetical protein	orf19.7850	IPF27125.1	Contig20045:complement(46758..46411)
orf19.2180_458	1356.19	0.0746264	0.28509	0.878008	0.0746264	1.29062	1.29062	FLT up vs GRD	4.19831	1.51867	0.0251153	1	orf19.2180_458	, , orf19.9726 | IPF25136.1 | Contig20141:37427..38542 , calcium-binding protein			calcium-binding protein	orf19.9726	IPF25136.1	Contig20141:37427..38542
orf19.2181_14	17.75	0.730486	0.681638	0.482939	0.730486	0.637837	-1.5678	FLT down vs GRD	0.12729	0.632297	0.541213	1	orf19.2181_14	, , orf19.9727 | IPF25147.1 | Contig20141:complement(38060..37362) , hypothetical protein			hypothetical protein	orf19.9727	IPF25147.1	Contig20141:complement(38060..37362)
orf19.2182_6188	2390.25	0.0747671	0.751912	0.760877	0.0747671	1.68874	1.68874	FLT up vs GRD	4.19334	0.525602	0.0991765	1	orf19.2182_6188	BLM3 , , orf19.9728 | IPF25148.1 | Contig20141:complement(45396..38794) , integral membrane protein possibly involved in bleomycin resistance	BLM3		integral membrane protein possibly involved in bleomycin resistance	orf19.9728	IPF25148.1	Contig20141:complement(45396..38794)
orf19.2183_914	1700.25	0.933998	0.140628	0.438381	0.933998	0.97151	-1.02933	FLT down vs GRD	0.00730292	2.30539	0.665065	1	orf19.2183_914	KRE30 , , orf19.9729 | IPF25112.1 | Contig20141:46470..48299 , ABC transporter | best homolog of Killer toxin REsistant	KRE30		ABC transporter | best homolog of Killer toxin REsistant	orf19.9729	IPF25112.1	Contig20141:46470..48299
orf19.2184_659	462.5	0.932275	0.0553392	0.0238989	0.932275	0.966766	-1.03438	FLT down vs GRD	0.00769038	3.5371	7.73226	1	orf19.2184_659	, , orf19.9730 | IPF12454.2 | Contig20141:complement(49636..48758) , degradation of aromatic compounds | 2-keto-4-pentenoate hydratase/2-oxohepta-3-ene-1,7-dioic acid hydratase (catechol pathway)			degradation of aromatic compounds | 2-keto-4-pentenoate hydratase/2-oxohepta-3-ene-1,7-dioic acid hydratase (catechol pathway)	orf19.9730	IPF12454.2	Contig20141:complement(49636..48758)
orf19.2185_102	627.813	0.225861	0.433052	0.211163	0.225861	0.732647	-1.36491	FLT down vs GRD	1.72178	1.09212	1.84737	1	orf19.2185_102	NSA1 , , orf19.9731 | IPF25132.1 | Contig20141:50395..51615 , Nop seven associated | ribosome biogenesis	NSA1		Nop seven associated | ribosome biogenesis	orf19.9731	IPF25132.1	Contig20141:50395..51615
orf19.2186_827	1266.06	0.739587	0.238308	0.369408	0.739587	1.09235	1.09235	FLT up vs GRD	0.118456	1.70886	0.904559	1	orf19.2186_827	SEH1 , , orf19.9732 | IPF25138.1 | Contig20141:complement(52621..51608) , nuclear pore protein	SEH1		nuclear pore protein	orf19.9732	IPF25138.1	Contig20141:complement(52621..51608)
orf19.2187_1321	748	0.271413	0.121345	0.212136	0.271413	1.42323	1.42323	FLT up vs GRD	1.39544	2.48376	1.83869	1	orf19.2187_1321	ALG7 , , orf19.9733 | IPF25121.1 | Contig20141:53177..54661 , tunicamycin resistance protein | UDP-N-acetylglucosamine-1- phosphate transferase	ALG7		tunicamycin resistance protein | UDP-N-acetylglucosamine-1- phosphate transferase	orf19.9733	IPF25121.1	Contig20141:53177..54661
orf19.2190_1103	473.188	0.604813	0.388245	0.743958	0.604813	1.27319	1.27319	FLT up vs GRD	0.290105	1.20189	0.114341	1	orf19.2190_1103	VRP1 , , orf19.9736 | IPF25107.1 | Contig20141:54866..56860 , proline-rich protein verprolin | potential actin-interacting WH2 domain	VRP1		proline-rich protein verprolin | potential actin-interacting WH2 domain	orf19.9736	IPF25107.1	Contig20141:54866..56860
orf19.2191_321	133.313	0.119746	0.112	0.221573	0.119746	1.78986	1.78986	FLT up vs GRD	3.03331	2.58306	1.75723	1	orf19.2191_321	, , orf19.9737 | IPF25137.1 | Contig20141:complement(57949..56912) , conserved hypothetical protein			conserved hypothetical protein	orf19.9737	IPF25137.1	Contig20141:complement(57949..56912)
orf19.2192_2518	8022.56	0.00043348	0.00180464	0.0888766	0.00043348	0.596721	-1.67583	FLT down vs GRD	32.9583	11.3396	3.74858	1	orf19.2192_2518	GDH2 , , orf19.9738 | IPF19745.1 | Contig20141:complement(61768..58598) , NAD-specific glutamate dehydrogenase	GDH2		NAD-specific glutamate dehydrogenase	orf19.9738	IPF19745.1	Contig20141:complement(61768..58598)
orf19.2193_1245	2463	0.0315592	0.130455	0.13743	0.0315592	0.817885	-1.22267	FLT down vs GRD	6.76621	2.39552	2.72443	1	orf19.2193_1245	PRS5 , , orf19.9739 | IPF25123.1 | Contig20141:complement(65822..64482) , phosphoribosylpyrophosphate synthetase	PRS5		phosphoribosylpyrophosphate synthetase	orf19.9739	IPF25123.1	Contig20141:complement(65822..64482)
orf19.2194_960	536.563	0.271222	0.0322465	0.228046	0.271222	0.875067	-1.14277	FLT down vs GRD	1.39664	4.38061	1.70407	1	orf19.2194_960	APM4 , , orf19.9740 | IPF25124.1 | Contig20141:complement(67536..66124) , medium subunit of clathrin associated protein | AP-2 complex subunit	APM4		medium subunit of clathrin associated protein | AP-2 complex subunit	orf19.9740	IPF25124.1	Contig20141:complement(67536..66124)
orf19.2195_289	46.5	0.5524	0.123628	0.946486	0.5524	0.765827	-1.30578	FLT down vs GRD	0.384606	2.46091	0.00479639	1	orf19.2195_289	, , orf19.9741 | IPF25151.1 | Contig20141:68242..68805 , hypothetical protein			hypothetical protein	orf19.9741	IPF25151.1	Contig20141:68242..68805
orf19.2196_1134	785.938	0.0057887	0.183545	0.0146496	0.0057887	1.43443	1.43443	FLT up vs GRD	13.912	1.99663	9.61452	1	orf19.2196_1134	CUE3 , , orf19.9742 | IPF25128.1 | Contig20141:complement(69182..67818) , conserved hypothetical membrane protein	CUE3		conserved hypothetical membrane protein	orf19.9742	IPF25128.1	Contig20141:complement(69182..67818)
orf19.2197_1388	108.125	0.0439267	0.186889	0.900365	0.0439267	2.45327	2.45327	FLT up vs GRD	5.70716	1.97628	0.0167005	1	orf19.2197_1388	FMO2 , , orf19.9743 | IPF25119.1 | Contig20141:complement(71341..69839) , flavin-containing monooxygenase	FMO2		flavin-containing monooxygenase	orf19.9743	IPF25119.1	Contig20141:complement(71341..69839)
orf19.2198_1825	699.375	0.419973	0.26479	0.506861	0.419973	1.14164	1.14164	FLT up vs GRD	0.722699	1.5964	0.482732	1	orf19.2198_1825	, , orf19.9744 | IPF25103.1 | Contig20141:complement(74467..72311) , conserved hypothetical membrane protein			conserved hypothetical membrane protein	orf19.9744	IPF25103.1	Contig20141:complement(74467..72311)
orf19.2199_715	1110.88	0.9124	0.120182	0.390024	0.9124	0.985992	-1.01421	FLT down vs GRD	0.0128913	2.49561	0.825876	1	orf19.2199_715	PHO86 , , orf19.9745 | IPF25140.1 | Contig20141:75839..76846 , inorganic phosphate transporter	PHO86		inorganic phosphate transporter	orf19.9745	IPF25140.1	Contig20141:75839..76846
orf19.22_458	955.375	0.00214087	0.625936	0.97346	0.00214087	2.43037	2.43037	FLT up vs GRD	19.7976	0.721237	0.00117813	1	orf19.22_458	, , orf19.7693 | IPF18727.2 | Contig20014:complement(10291..9557) , MPV17 homolog | hypothetical protein			MPV17 homolog | hypothetical protein	orf19.7693	IPF18727.2	Contig20014:complement(10291..9557)
orf19.220_296	23267.6	0.161029	0.685078	0.150567	0.161029	1.08951	1.08951	FLT up vs GRD	2.38571	0.626957	2.52713	1	orf19.220_296	PIR1 , , orf19.7851 | IPF15363.2 | Contig20045:52307..53464 , cell wall structural constituent with tandem repeats	PIR1		cell wall structural constituent with tandem repeats	orf19.7851	IPF15363.2	Contig20045:52307..53464
orf19.2200_1029	643.25	0.41888	0.181131	0.971463	0.41888	0.812523	-1.23073	FLT down vs GRD	0.726255	2.0116	0.00136218	1	orf19.2200_1029	VIP36 , , orf19.9746 | IPF25130.1 | Contig20141:complement(78305..76995) , vesicular integral-membrane protein VIP36-like	VIP36		vesicular integral-membrane protein VIP36-like	orf19.9746	IPF25130.1	Contig20141:complement(78305..76995)
orf19.2201_43	1807.75	0.621214	0.447837	0.516143	0.621214	1.16875	1.16875	FLT up vs GRD	0.26409	1.0585	0.461389	1	orf19.2201_43	CBP6 , , orf19.9747 | IPF18593.2 | Contig20141:complement(79148..78810) , pre-mRNA processing protein | translational activator	CBP6		pre-mRNA processing protein | translational activator	orf19.9747	IPF18593.2	Contig20141:complement(79148..78810)
orf19.2202_469	440.375	0.0756913	0.309107	0.176568	0.0756913	0.554892	-1.80215	FLT down vs GRD	4.16099	1.43453	2.19694	1	orf19.2202_469	PGM , , orf19.9748 | IPF18594.1 | Contig20141:79899..80624 , phosphoglycerate mutase	PGM		phosphoglycerate mutase	orf19.9748	IPF18594.1	Contig20141:79899..80624
orf19.2203_197	32.25	0.408773	0.734355	0.506005	0.408773	1.71955	1.71955	FLT up vs GRD	0.759851	0.551877	0.484736	1	orf19.2203_197	, , , hypothetical protein			hypothetical protein
orf19.2204.2	1138.25	0.000464073	0.0254121	0.0684517	0.000464073	1.59934	1.59934	FLT up vs GRD	32.2818	4.78842	4.42912	1	orf19.2204.2	RHO2 , , orf19.9749.2 | IPF25102.1 | Contig20141:complement(84048..83794) , GTP-binding protein of the rho subfamily	RHO2		GTP-binding protein of the rho subfamily	orf19.9749.2	IPF25102.1	Contig20141:complement(84048..83794)
orf19.2204_289	1025.38	0.000611797	0.164877	0.465356	0.000611797	1.6499	1.6499	FLT up vs GRD	29.656	2.119	0.587625	1	orf19.2204_289	, , orf19.9749 | IPF25125.1 | Contig20141:complement(82737..81388) , conserved hypothetical membrane protein			conserved hypothetical membrane protein	orf19.9749	IPF25125.1	Contig20141:complement(82737..81388)
orf19.2208_3353	988.313	0.311821	0.150249	0.19731	0.311821	1.14914	1.14914	FLT up vs GRD	1.16538	2.22713	1.97728	1	orf19.2208_3353	, , orf19.9753 | IPF25161.1 | Contig20141:complement(89455..85247) , conserved hypothetical protein			conserved hypothetical protein	orf19.9753	IPF25161.1	Contig20141:complement(89455..85247)
orf19.2209_1299	336.125	0.490989	0.240354	0.572886	0.490989	1.34207	1.34207	FLT up vs GRD	0.520955	1.69967	0.345498	1	orf19.2209_1299	, , orf19.9754 | IPF25104.1 | Contig20141:complement(92692..90665) , ion transport protein			ion transport protein	orf19.9754	IPF25104.1	Contig20141:complement(92692..90665)
orf19.2210_1541	310.25	0.162239	0.696566	0.413751	0.162239	1.80712	1.80712	FLT up vs GRD	2.37014	0.60923	0.743133	1	orf19.2210_1541	, , orf19.9755 | IPF19934.2 | Contig20141:95821..97869 , hypothetical protein			hypothetical protein	orf19.9755	IPF19934.2	Contig20141:95821..97869
orf19.2211_710	107.625	0.585857	0.91015	0.217293	0.585857	1.2455	1.2455	FLT up vs GRD	0.322206	0.282273	1.79357	1	orf19.2211_710	, , orf19.9756 | IPF25144.1 | Contig20141:complement(98814..97945) , hypothetical protein			hypothetical protein	orf19.9756	IPF25144.1	Contig20141:complement(98814..97945)
orf19.2212_43	618.125	0.501017	0.193052	0.573489	0.501017	1.1709	1.1709	FLT up vs GRD	0.496547	1.93988	0.344391	1	orf19.2212_43	, , orf19.9757 | IPF25170.1 | Contig20141:99023..99346 , hypothetical protein			hypothetical protein	orf19.9757	IPF25170.1	Contig20141:99023..99346
orf19.2213_1271	270.563	0.555629	0.905392	0.373025	0.555629	1.18872	1.18872	FLT up vs GRD	0.378246	0.290396	0.89026	1	orf19.2213_1271	, , orf19.9758 | IPF25122.1 | Contig20141:complement(100775..99411) , hypothetical protein			hypothetical protein	orf19.9758	IPF25122.1	Contig20141:complement(100775..99411)
orf19.2214_598	1493.25	0.826193	0.0884713	0.112646	0.826193	1.1077	1.1077	FLT up vs GRD	0.0514833	2.8855	3.1747	1	orf19.2214_598	MRPL7 , , orf19.9759 | IPF25143.1 | Contig20141:complement(101874..101011) , mitochondrial ribosomal protein	MRPL7		mitochondrial ribosomal protein	orf19.9759	IPF25143.1	Contig20141:complement(101874..101011)
orf19.2215_1244	470.813	0.0307267	0.720521	0.540079	0.0307267	0.568484	-1.75906	FLT down vs GRD	6.85603	0.572726	0.409571	1	orf19.2215_1244	GLE1 , , orf19.9760 | IPF25118.1 | Contig20141:102591..104051 , RNA export mediator	GLE1		RNA export mediator	orf19.9760	IPF25118.1	Contig20141:102591..104051
orf19.2216_3310	461.75	0.148069	0.489093	0.288821	0.148069	1.59471	1.59471	FLT up vs GRD	2.56285	0.97037	1.29061	1	orf19.2216_3310	PDS5 , , orf19.9761 | IPF25164.1 | Contig20141:complement(108097..104186) , Precocious Dissociation of Sister chromatids | chromosome dynamics	PDS5		Precocious Dissociation of Sister chromatids | chromosome dynamics	orf19.9761	IPF25164.1	Contig20141:complement(108097..104186)
orf19.2217_2	378.063	0.877528	0.137823	0.46456	0.877528	0.963759	-1.0376	FLT down vs GRD	0.025315	2.32944	0.589798	1	orf19.2217_2	PAP2 , , orf19.9762 | IPF25116.1 | Contig20141:108240..109850 , prolyl aminopeptidase	PAP2		prolyl aminopeptidase	orf19.9762	IPF25116.1	Contig20141:108240..109850
orf19.2218_258	751.688	0.00120451	0.250126	0.489744	0.00120451	2.5336	2.5336	FLT up vs GRD	23.9406	1.65696	0.524049	1	orf19.2218_258	, , orf19.9763 | IPF25109.1 | Contig20141:complement(111828..109954) , hypothetical protein			hypothetical protein	orf19.9763	IPF25109.1	Contig20141:complement(111828..109954)
orf19.2219_3334	1168	0.401405	0.138027	0.131866	0.401405	0.784576	-1.27457	FLT down vs GRD	0.785204	2.32767	2.81569	1	orf19.2219_3334	REV2 , , orf19.9764 | IPF25165.1 | Contig20141:113246..116806 , reverse transcriptase	REV2		reverse transcriptase	orf19.9764	IPF25165.1	Contig20141:113246..116806
orf19.2220_60	7417.38	0.153382	0.119645	0.307889	0.153382	1.48126	1.48126	FLT up vs GRD	2.48782	2.50112	1.18581	1	orf19.2220_60	, , orf19.9765 | IPF25157.1 | Contig20141:118003..118314 , hypothetical protein			hypothetical protein	orf19.9765	IPF25157.1	Contig20141:118003..118314
orf19.2222.1	236.125	0.954979	0.559508	0.342267	0.954979	0.980318	-1.02008	FLT down vs GRD	0.00339295	0.835427	1.01919	1	orf19.2222.1	, , , Esa1p-associated factor			Esa1p-associated factor
orf19.2222_835	351.375	0.311271	0.994444	0.660976	0.311271	1.36169	1.36169	FLT up vs GRD	1.16821	0.0749934	0.207324	1	orf19.2222_835	YCK1 , , orf19.9767 | IPF25134.1 | Contig20141:complement(120078..118942) , casein kinase I	YCK1		casein kinase I	orf19.9767	IPF25134.1	Contig20141:complement(120078..118942)
orf19.2223_584	329.625	0.784329	0.151245	0.697338	0.784329	0.924249	-1.08196	FLT down vs GRD	0.080114	2.21937	0.162598	1	orf19.2223_584	, , orf19.9768 | IPF25126.1 | Contig20141:122145..123554 , TNF receptor associated factor			TNF receptor associated factor	orf19.9768	IPF25126.1	Contig20141:122145..123554
orf19.2224_96	1317.38	0.175804	0.630532	0.0106851	0.175804	0.885681	-1.12908	FLT down vs GRD	2.20569	0.713699	10.9616	1	orf19.2224_96	, , , hypothetical protein			hypothetical protein
orf19.2225_160	3317.88	0.0082298	0.439777	0.392699	0.0082298	1.51693	1.51693	FLT up vs GRD	12.1619	1.07668	0.816147	1	orf19.2225_160	UBC13 , , , E2 ubiquitin-conjugating enzyme	UBC13		E2 ubiquitin-conjugating enzyme
orf19.2226_348	280	0.365446	0.25397	0.605101	0.365446	1.42427	1.42427	FLT up vs GRD	0.92047	1.64069	0.289633	1	orf19.2226_348	, , , hypothetical protein			hypothetical protein
orf19.2227_341	64.3125	0.802983	0.0308319	0.413816	0.802983	0.864962	-1.15612	FLT down vs GRD	0.0665201	4.45565	0.742918	1	orf19.2227_341	, , orf19.9769 | IPF25081.1 | Contig20143:complement(537..70) , putative sulfate transporter			putative sulfate transporter	orf19.9769	IPF25081.1	Contig20143:complement(537..70)
orf19.2228_582	99.9375	0.51686	0.710918	0.528196	0.51686	0.600427	-1.66548	FLT down vs GRD	0.45977	0.587292	0.43473	1	orf19.2228_582	TWF1 , , orf19.9770 | IPF25058.1 | Contig20143:937..2160 , twinfilin A | actin monomer sequestering protein	TWF1		twinfilin A | actin monomer sequestering protein	orf19.9770	IPF25058.1	Contig20143:937..2160
orf19.2229_830	557.563	0.703767	0.00142995	0.588765	0.703767	0.941553	-1.06207	FLT down vs GRD	0.155356	12.1478	0.317136	1	orf19.2229_830	, , orf19.9771 | IPF25048.1 | Contig20143:complement(3904..2258) , zinc-finger protein			zinc-finger protein	orf19.9771	IPF25048.1	Contig20143:complement(3904..2258)
orf19.223_1792	1691.88	0.463607	0.166105	0.0417539	0.463607	1.08516	1.08516	FLT up vs GRD	0.59241	2.11045	5.86354	1	orf19.223_1792	KIN82 , , orf19.7854 | IPF19261.2 | Contig20045:complement(56474..54087) , serine/threonine protein kinase	KIN82		serine/threonine protein kinase	orf19.7854	IPF19261.2	Contig20045:complement(56474..54087)
orf19.2230_219	1334.81	0.000126837	0.605077	0.0324299	0.000126837	1.66331	1.66331	FLT up vs GRD	47.3593	0.755992	6.67543	1	orf19.2230_219	RDS3 , , orf19.9772 | IPF25091.1 | Contig20143:4185..4544 , transcription factor required for cell viability	RDS3		transcription factor required for cell viability	orf19.9772	IPF25091.1	Contig20143:4185..4544
orf19.2231_41	553.625	0.787732	0.152216	0.254067	0.787732	0.962735	-1.03871	FLT down vs GRD	0.0775321	2.21186	1.50993	1	orf19.2231_41	, , orf19.9773 | IPF25069.1 | Contig20143:complement(5396..4617) , hypothetical protein			hypothetical protein	orf19.9773	IPF25069.1	Contig20143:complement(5396..4617)
orf19.2232_254	14013.1	0.626007	0.012861	0.0958826	0.626007	0.9459	-1.05719	FLT down vs GRD	0.256783	6.09257	3.56038	1	orf19.2232_254	RPL11 , , orf19.9774 | IPF25080.1 | Contig20143:complement(7877..7377) , ribosomal protein L11A	RPL11		ribosomal protein L11A	orf19.9774	IPF25080.1	Contig20143:complement(7877..7377)
orf19.2233_700	4815.06	0.393503	0.335925	0.434344	0.393503	1.20397	1.20397	FLT up vs GRD	0.813243	1.34892	0.677356	1	orf19.2233_700	PRE2 , , orf19.9775 | IPF25065.1 | Contig20143:complement(9511..8654) , 20S proteasome subunit	PRE2		20S proteasome subunit	orf19.9775	IPF25065.1	Contig20143:complement(9511..8654)
orf19.2236_2657	326.75	0.0845387	0.0804175	0.86523	0.0845387	0.602884	-1.6587	FLT down vs GRD	3.87502	3.01248	0.0307162	1	orf19.2236_2657	FHL1 , , orf19.9778 | IPF9040.3 | Contig20143:complement(13406..9918) , transcriptional regulator of the forkhead/HNF3 family	FHL1		transcriptional regulator of the forkhead/HNF3 family	orf19.9778	IPF9040.3	Contig20143:complement(13406..9918)
orf19.2237_1041	173.188	0.417894	0.315716	0.737975	0.417894	1.34032	1.34032	FLT up vs GRD	0.729472	1.41268	0.119994	1	orf19.2237_1041	SPR1 , , orf19.9779 | IPF25049.1 | Contig20143:14333..15865 , exo-1,3-beta-glucanase	SPR1		exo-1,3-beta-glucanase	orf19.9779	IPF25049.1	Contig20143:14333..15865
orf19.2238_2206	145.438	0.520519	0.368522	0.822893	0.520519	1.47609	1.47609	FLT up vs GRD	0.451574	1.2546	0.0534964	1	orf19.2238_2206	, , orf19.9780 | IPF25036.1 | Contig20143:19154..21538 , GDP/GTP exchange factor			GDP/GTP exchange factor	orf19.9780	IPF25036.1	Contig20143:19154..21538
orf19.2239_1191	367.5	0.632836	0.169637	0.945258	0.632836	1.05771	1.05771	FLT up vs GRD	0.246599	2.08627	0.00501944	1	orf19.2239_1191	, , orf19.9781 | IPF25034.1 | Contig20143:21493..24108 , GDP/GTP exchange factor			GDP/GTP exchange factor	orf19.9781	IPF25034.1	Contig20143:21493..24108
orf19.224_226	79.4375	0.946056	0.635957	0.684364	0.946056	0.974134	-1.02655	FLT down vs GRD	0.00487383	0.704849	0.177811	1	orf19.224_226	, , , hypothetical protein			hypothetical protein
orf19.2241_383	9804.75	0.00823827	0.362239	0.313896	0.00823827	0.573593	-1.7434	FLT down vs GRD	12.157	1.27205	1.15475	1	orf19.2241_383	PST1 , , , 1,4-benzoquinone reductase | brefeldin A resistance protein | Protoplast-SecreTed protein	PST1		1,4-benzoquinone reductase | brefeldin A resistance protein | Protoplast-SecreTed protein
orf19.2242_1203	4800	0.415724	0.118891	0.957617	0.415724	1.2191	1.2191	FLT up vs GRD	0.7366	2.50892	0.00300656	1	orf19.2242_1203	PRB1 , PRB1 , orf19.9783 | IPF12896.2 | Contig20143:complement(27169..25772) , subtilisin-like endoprotease B	PRB1	PRB1	subtilisin-like endoprotease B	orf19.9783	IPF12896.2	Contig20143:complement(27169..25772)
orf19.2244_380	5106.88	0.697803	0.0755128	0.249738	0.697803	0.89573	-1.11641	FLT down vs GRD	0.162067	3.09771	1.54025	1	orf19.2244_380	, , orf19.9785 | IPF12897.2 | Contig20143:complement(28508..27549) , aldo/keto reductase			aldo/keto reductase	orf19.9785	IPF12897.2	Contig20143:complement(28508..27549)
orf19.2245_209	1203.19	0.0300934	0.989623	0.425131	0.0300934	0.686143	-1.45742	FLT down vs GRD	6.92643	0.09881	0.706132	1	orf19.2245_209	YPT7 , , orf19.9785.1 | IPF19068.2 | Contig20143:29409..29918 , GTP-binding protein fo the rab family	YPT7		GTP-binding protein fo the rab family	orf19.9785.1	IPF19068.2	Contig20143:29409..29918
orf19.2246_503	398.938	0.54663	0.106394	0.0790539	0.54663	1.16664	1.16664	FLT up vs GRD	0.396157	2.64759	4.04745	1	orf19.2246_503	, , orf19.9786 | IPF25072.1 | Contig20143:complement(30831..30061) , conserved hypothetical protein			conserved hypothetical protein	orf19.9786	IPF25072.1	Contig20143:complement(30831..30061)
orf19.2247_1423	238.813	0.0717119	0.472626	0.968539	0.0717119	2.00197	2.00197	FLT up vs GRD	4.30407	1.00462	0.00165582	1	orf19.2247_1423	, , orf19.9787 | IPF25051.1 | Contig20143:complement(32610..31084) , conserved hypothetical membrane protein			conserved hypothetical membrane protein	orf19.9787	IPF25051.1	Contig20143:complement(32610..31084)
orf19.2248_1635	1022.81	0.0447121	0.50209	0.71534	0.0447121	0.600334	-1.66574	FLT down vs GRD	5.65303	0.944134	0.142803	1	orf19.2248_1635	ARE2 , , orf19.9788 | IPF10109.2 | Contig20143:complement(35870..34041) , acyl-CoA sterol acyltransferase	ARE2		acyl-CoA sterol acyltransferase	orf19.9788	IPF10109.2	Contig20143:complement(35870..34041)
orf19.2249_648	703.375	0.821217	0.207813	0.842256	0.821217	0.948472	-1.05433	FLT down vs GRD	0.0545347	1.85806	0.0422618	1	orf19.2249_648	, , orf19.9789 | IPF25071.1 | Contig20143:complement(38674..37958) , neutral zinc metallopeptidase			neutral zinc metallopeptidase	orf19.9789	IPF25071.1	Contig20143:complement(38674..37958)
orf19.225_145	571.563	0.459376	0.483864	0.501889	0.459376	1.17416	1.17416	FLT up vs GRD	0.604116	0.98112	0.494466	1	orf19.225_145	, , orf19.7855 | IPF27113.1 | Contig20045:57750..58799 , hydroxyisocaproate dehydrogenase			hydroxyisocaproate dehydrogenase	orf19.7855	IPF27113.1	Contig20045:57750..58799
orf19.2250_700	5521	0.0280903	0.173026	0.21573	0.0280903	0.627922	-1.59255	FLT down vs GRD	7.16213	2.06364	1.80708	1	orf19.2250_700	SPE3 , , orf19.9790 | IPF25063.1 | Contig20143:39444..40337 , spermidine synthase | putrescine aminopropyltransferase	SPE3		spermidine synthase | putrescine aminopropyltransferase	orf19.9790	IPF25063.1	Contig20143:39444..40337
orf19.2251_675	266	0.141556	0.189823	0.41439	0.141556	0.488868	-2.04554	FLT down vs GRD	2.65987	1.95878	0.741013	1	orf19.2251_675	AAH1 , , orf19.9791 | IPF25061.1 | Contig20143:40898..41941 , adenine aminohydrolase | adenine deaminase	AAH1		adenine aminohydrolase | adenine deaminase	orf19.9791	IPF25061.1	Contig20143:40898..41941
orf19.2252_1077	34.6875	0.270906	0.0721533	0.0188695	0.270906	2.82421	2.82421	FLT up vs GRD	1.39864	3.1601	8.61095	1	orf19.2252_1077	IFT3 , , orf19.9792 | IPF10120.2 | Contig20143:43323..44777 , hypothetical protein	IFT3		hypothetical protein	orf19.9792	IPF10120.2	Contig20143:43323..44777
orf19.2253_1449	458.563	0.420694	0.0313228	0.208735	0.420694	1.23185	1.23185	FLT up vs GRD	0.720364	4.42913	1.86928	1	orf19.2253_1449	IFT1 , , orf19.9793 | IPF25047.1 | Contig20143:46106..47662 , hypothetical protein	IFT1		hypothetical protein	orf19.9793	IPF25047.1	Contig20143:46106..47662
orf19.2256_442	551.5	0.112497	0.664146	0.634828	0.112497	0.516269	-1.93698	FLT down vs GRD	3.1778	0.659699	0.243678	1	orf19.2256_442	, , orf19.9796 | IPF25074.1 | Contig20143:48099..48791 , hypothetical ankyrin-repeat protein			hypothetical ankyrin-repeat protein	orf19.9796	IPF25074.1	Contig20143:48099..48791
orf19.2257_399	1914.94	0.240813	0.114047	0.0761817	0.240813	1.11153	1.11153	FLT up vs GRD	1.60514	2.56047	4.14403	1	orf19.2257_399	, , orf19.9797 | IPF25062.1 | Contig20143:49174..50193 , hypothetical protein			hypothetical protein	orf19.9797	IPF25062.1	Contig20143:49174..50193
orf19.2258_771	563.563	0.799327	0.132049	0.77151	0.799327	0.92065	-1.08619	FLT down vs GRD	0.0690775	2.38085	0.0902565	1	orf19.2258_771	, , orf19.9798 | IPF25059.1 | Contig20143:complement(51533..50349) , hypothetical protein			hypothetical protein	orf19.9798	IPF25059.1	Contig20143:complement(51533..50349)
orf19.2259_128	1203.44	0.232126	0.571531	0.271027	0.232126	1.48107	1.48107	FLT up vs GRD	1.67163	0.813952	1.39787	1	orf19.2259_128	, , orf19.9799 | IPF25066.1 | Contig20143:complement(52639..51761) , hypothetical protein			hypothetical protein	orf19.9799	IPF25066.1	Contig20143:complement(52639..51761)
orf19.226_363	365.125	0.271782	0.373274	0.0019186	0.271782	0.727023	-1.37547	FLT down vs GRD	1.39311	1.24163	20.5415	1	orf19.226_363	, , orf19.7856 | IPF27121.1 | Contig20045:complement(59287..58823) , hypothetical protein			hypothetical protein	orf19.7856	IPF27121.1	Contig20045:complement(59287..58823)
orf19.2260_250	349.875	0.131199	0.00401321	0.298407	0.131199	1.28212	1.28212	FLT up vs GRD	2.82698	8.89391	1.2367	1	orf19.2260_250	BCD1 , , orf19.9800 | IPF25060.1 | Contig20143:52791..53879 , Box C/D snoRNA accumulation	BCD1		Box C/D snoRNA accumulation	orf19.9800	IPF25060.1	Contig20143:52791..53879
orf19.2261_686	863.688	0.484513	0.257966	0.603235	0.484513	1.32713	1.32713	FLT up vs GRD	0.537205	1.62409	0.292692	1	orf19.2261_686	HSH49 , HSH49 , orf19.9801 | IPF25070.1 | Contig20143:54346..55125 , spliceosome-associated essential protein	HSH49	HSH49	spliceosome-associated essential protein	orf19.9801	IPF25070.1	Contig20143:54346..55125
orf19.2262_1054	5263.13	0.557597	0.21123	0.14826	0.557597	1.11591	1.11591	FLT up vs GRD	0.374407	1.8401	2.56008	1	orf19.2262_1054	ZTA1 , , orf19.9802 | IPF25057.1 | Contig20143:55272..56519 , NADPH:quinone reductase | zeta-crystallin	ZTA1		NADPH:quinone reductase | zeta-crystallin	orf19.9802	IPF25057.1	Contig20143:55272..56519
orf19.2263_441	1205.38	0.189335	0.379377	0.184547	0.189335	0.707149	-1.41413	FLT down vs GRD	2.05786	1.22522	2.10848	1	orf19.2263_441	, , orf19.9803 | IPF25078.1 | Contig20143:complement(57089..56550) , hypothetical protein			hypothetical protein	orf19.9803	IPF25078.1	Contig20143:complement(57089..56550)
orf19.2264_357	499.625	0.660433	0.239003	0.201107	0.660433	1.1174	1.1174	FLT up vs GRD	0.208043	1.70573	1.94046	1	orf19.2264_357	OLE2 , , orf19.9804 | IPF25050.1 | Contig20143:complement(58958..57378) , stearoyl-CoA desaturase	OLE2		stearoyl-CoA desaturase	orf19.9804	IPF25050.1	Contig20143:complement(58958..57378)
orf19.2265_1062	993.313	0.403092	0.195749	0.261141	0.403092	0.879326	-1.13724	FLT down vs GRD	0.779334	1.92439	1.46193	1	orf19.2265_1062	SNF12 , , orf19.9805 | IPF25054.1 | Contig20143:59313..60722 , subunit of SWI/SNF transcription activation complex	SNF12		subunit of SWI/SNF transcription activation complex	orf19.9805	IPF25054.1	Contig20143:59313..60722
orf19.2266_1738	441.688	0.085878	0.0416398	0.378466	0.085878	0.742126	-1.34748	FLT down vs GRD	3.8351	3.96792	0.869156	1	orf19.2266_1738	IOC3 , , orf19.9806 | IPF19585.2 | Contig20143:complement(63353..60861) , conserved hypothetical protein	IOC3		conserved hypothetical protein	orf19.9806	IPF19585.2	Contig20143:complement(63353..60861)
orf19.2267_141	1668.38	0.30962	0.0584682	0.466528	0.30962	1.22739	1.22739	FLT up vs GRD	1.17677	3.45704	0.584434	1	orf19.2267_141	RFA2 , , orf19.9807 | IPF19276.2 | Contig20143:64016..64834 , subunit 2 of replication factor RF- A involved in nucleotide excision repair	RFA2		subunit 2 of replication factor RF- A involved in nucleotide excision repair	orf19.9807	IPF19276.2	Contig20143:64016..64834
orf19.2268_1642	8986	0.00480817	0.186778	0.0467885	0.00480817	0.686684	-1.45627	FLT down vs GRD	14.9004	1.97695	5.5156	1	orf19.2268_1642	RCK2 , , orf19.9808 | IPF19933.1 | Contig20143:complement(67040..65322) , Ca2+/calmodulin- dependent serine/threonine protein kinase	RCK2		Ca2+/calmodulin- dependent serine/threonine protein kinase	orf19.9808	IPF19933.1	Contig20143:complement(67040..65322)
orf19.2269_481	3340.19	0.024841	0.204879	0.127674	0.024841	0.301631	-3.31531	FLT down vs GRD	7.59363	1.87377	2.88787	1	orf19.2269_481	, , orf19.9809 | IPF25073.1 | Contig20143:69382..70119 , 3-phosphoserine phosphatase			3-phosphoserine phosphatase	orf19.9809	IPF25073.1	Contig20143:69382..70119
orf19.227_7	11793.4	0.17621	0.033975	0.924576	0.17621	0.814647	-1.22753	FLT down vs GRD	2.20103	4.29427	0.00954483	1	orf19.227_7	COX7 , , orf19.7857 | IPF27081.1 | Contig20046:complement(526..149) , cytochrome-c oxidase, subunit VII	COX7		cytochrome-c oxidase, subunit VII	orf19.7857	IPF27081.1	Contig20046:complement(526..149)
orf19.2270_1452	3041.31	0.000173124	0.0135035	0.483179	0.000173124	0.562036	-1.77925	FLT down vs GRD	43.2844	5.99187	0.5406	1	orf19.2270_1452	SMF1 , , orf19.9810 | IPF25043.1 | Contig20143:71477..73288 , manganese transporter	SMF1		manganese transporter	orf19.9810	IPF25043.1	Contig20143:71477..73288
orf19.2272_2220	613.063	0.252275	0.0342838	0.328444	0.252275	1.29318	1.29318	FLT up vs GRD	1.52239	4.27941	1.08305	1	orf19.2272_2220	, , orf19.9812 | IPF25037.1 | Contig20143:complement(76045..73649) , hypothetical transcription factor			hypothetical transcription factor	orf19.9812	IPF25037.1	Contig20143:complement(76045..73649)
orf19.2274_382	58.0625	0.554075	0.352419	0.252604	0.554075	0.821357	-1.2175	FLT down vs GRD	0.381297	1.29999	1.52009	1	orf19.2274_382	, , orf19.9814 | IPF25067.1 | Contig20143:77929..78675 , hypothetical protein			hypothetical protein	orf19.9814	IPF25067.1	Contig20143:77929..78675
orf19.2275_196	4442.13	0.430696	0.0578343	0.0655595	0.430696	1.10428	1.10428	FLT up vs GRD	0.688627	3.47283	4.54663	1	orf19.2275_196	RPL12B , , orf19.9815 | IPF25079.1 | Contig20143:complement(79422..78898) , 60S ribosomal protein L7/L12	RPL12B		60S ribosomal protein L7/L12	orf19.9815	IPF25079.1	Contig20143:complement(79422..78898)
orf19.2276_50	2980.25	0.801166	0.387122	0.370203	0.801166	0.959035	-1.04272	FLT down vs GRD	0.0677848	1.20481	0.901395	1	orf19.2276_50	RPB9 , , orf19.9816 | IPF25086.1 | Contig20143:79980..80318 , DNA-directed RNA polymerase II	RPB9		DNA-directed RNA polymerase II	orf19.9816	IPF25086.1	Contig20143:79980..80318
orf19.2277_350	861.25	0.542951	0.586261	0.509068	0.542951	1.16195	1.16195	FLT up vs GRD	0.403651	0.788163	0.477592	1	orf19.2277_350	TPK2 , TPK2 , orf19.9817 | IPF25055.1 | Contig20143:complement(82082..80745) , cAMP-dependent protein kinase catalytic subunit	TPK2	TPK2	cAMP-dependent protein kinase catalytic subunit	orf19.9817	IPF25055.1	Contig20143:complement(82082..80745)
orf19.2278_65	2745.75	0.443126	0.0269693	0.602864	0.443126	0.926629	-1.07918	FLT down vs GRD	0.650862	4.6844	0.293302	1	orf19.2278_65	, , orf19.9818 | IPF25068.1 | Contig20143:83881..84675 , conserved hypothetical protein			conserved hypothetical protein	orf19.9818	IPF25068.1	Contig20143:83881..84675
orf19.2280_2217	278.125	0.376308	0.158346	0.00981016	0.376308	0.773824	-1.29228	FLT down vs GRD	0.877469	2.16579	11.3455	1	orf19.2280_2217	, , orf19.9820 | IPF25032.1 | Contig20143:complement(87606..84859) , zinc-finger transcription factor			zinc-finger transcription factor	orf19.9820	IPF25032.1	Contig20143:complement(87606..84859)
orf19.2281_972	101.188	0.481418	0.0686361	0.27754	0.481418	1.4912	1.4912	FLT up vs GRD	0.54511	3.22937	1.35746	1	orf19.2281_972	OCA1 , , orf19.9821 | IPF25052.1 | Contig20143:complement(89929..88424) , 3-oxoacid CoA-transferase	OCA1		3-oxoacid CoA-transferase	orf19.9821	IPF25052.1	Contig20143:complement(89929..88424)
orf19.2282_785	330.25	0.460149	0.0539394	0.0540405	0.460149	1.16182	1.16182	FLT up vs GRD	0.601963	3.57474	5.09051	1	orf19.2282_785	HQD1 , , orf19.9822 | IPF10074.1 | Contig20143:complement(91630..90638) , 6-chlorohydroxyquinol-1,2-dioxygenase	HQD1		6-chlorohydroxyquinol-1,2-dioxygenase	orf19.9822	IPF10074.1	Contig20143:complement(91630..90638)
orf19.2283_111	7421.69	0.721114	0.00635206	0.024443	0.721114	1.03511	1.03511	FLT up vs GRD	0.136768	7.69268	7.65137	1	orf19.2283_111	DQD1 , , orf19.9823 | IPF10071.2 | Contig20143:complement(92540..92100) , catabolic 3-dehydroquinase dehydratase	DQD1		catabolic 3-dehydroquinase dehydratase	orf19.9823	IPF10071.2	Contig20143:complement(92540..92100)
orf19.2284_534	894.938	0.199689	0.00609354	0.28782	0.199689	0.860751	-1.16178	FLT down vs GRD	1.9541	7.79587	1.29639	1	orf19.2284_534	, , orf19.9824 | IPF9998.2 | Contig20143:93029..94048 , flavoprotein oxygenase			flavoprotein oxygenase	orf19.9824	IPF9998.2	Contig20143:93029..94048
orf19.2285_1529	476.375	0.130292	0.220611	0.276683	0.130292	1.56593	1.56593	FLT up vs GRD	2.84243	1.7925	1.3627	1	orf19.2285_1529	, , orf19.9825 | IPF18802.2 | Contig20143:94289..95764 , conserved hypothetical protein			conserved hypothetical protein	orf19.9825	IPF18802.2	Contig20143:94289..95764
orf19.2286_674	2150.31	0.0223398	0.000280227	0.354202	0.0223398	1.22712	1.22712	FLT up vs GRD	7.9776	19.3323	0.967123	1	orf19.2286_674	, , orf19.9826 | IPF25064.1 | Contig20143:96205..97161 , phycocyanin alpha-subunit phycocyanobilin lyase			phycocyanin alpha-subunit phycocyanobilin lyase	orf19.9826	IPF25064.1	Contig20143:96205..97161
orf19.2287_107	563.313	0.474732	0.228005	0.834815	0.474732	0.807643	-1.23817	FLT down vs GRD	0.562497	1.75663	0.0464146	1	orf19.2287_107	RPA12 , , orf19.9827 | IPF25090.1 | Contig20143:complement(97615..97244) , DNA-directed RNA polymerase I	RPA12		DNA-directed RNA polymerase I	orf19.9827	IPF25090.1	Contig20143:complement(97615..97244)
orf19.2288_1468	3037.75	0.333583	0.425458	0.0199283	0.333583	0.874006	-1.14416	FLT down vs GRD	1.05884	1.10985	8.40305	1	orf19.2288_1468	CCT5 , , orf19.9828 | IPF25045.1 | Contig20143:98284..99909 , T-complex protein 1, epsilon subunit	CCT5		T-complex protein 1, epsilon subunit	orf19.9828	IPF25045.1	Contig20143:98284..99909
orf19.2289_1195	2295	0.0595946	0.371692	0.501641	0.0595946	0.771666	-1.2959	FLT down vs GRD	4.81146	1.24592	0.495057	1	orf19.2289_1195	ARP3 , , orf19.9829 | IPF25056.1 | Contig20143:100286..101545 , actin-related protein	ARP3		actin-related protein	orf19.9829	IPF25056.1	Contig20143:100286..101545
orf19.229_571	672.125	0.108457	0.0193333	0.058919	0.108457	1.4291	1.4291	FLT up vs GRD	3.26373	5.28625	4.84359	1	orf19.229_571	PSH1 , , orf19.7859 | IPF27020.1 | Contig20046:complement(2060..810) , associated with histones/Spt16/Pob3	PSH1		associated with histones/Spt16/Pob3	orf19.7859	IPF27020.1	Contig20046:complement(2060..810)
orf19.2290_207	62.1875	0.529853	0.649903	0.525558	0.529853	1.7884	1.7884	FLT up vs GRD	0.431156	0.682346	0.440466	1	orf19.2290_207	TOR1 , , orf19.9830 | IPF25075.1 | Contig20143:101794..102501 , 1-phosphatidylinositol 3-kinase	TOR1		1-phosphatidylinositol 3-kinase	orf19.9830	IPF25075.1	Contig20143:101794..102501
orf19.2291_2	67.375	0.809744	0.922116	0.984788	0.809744	0.853507	-1.17164	FLT down vs GRD	0.0619278	0.261259	0.000386904	1	orf19.2291_2	, , , hypothetical protein			hypothetical protein
orf19.2292_1314	10.6875	0.231982	0.0352597	0.129027	0.231982	4.92487	4.92487	FLT up vs GRD	1.67276	4.23354	2.86424	1	orf19.2292_1314	OPT4 , OPT4 , , oligopeptide transporter protein	OPT4	OPT4	oligopeptide transporter protein
orf19.2293_1115	270.125	0.731723	0.761085	0.890465	0.731723	0.85342	-1.17176	FLT down vs GRD	0.126068	0.511935	0.0202106	1	orf19.2293_1115	YAP6.5 , , , bZIP transcription factor	YAP6.5		bZIP transcription factor
orf19.2294.1	8880.5	0.127776	0.675304	0.233754	0.127776	0.791694	-1.26311	FLT down vs GRD	2.88607	0.642169	1.65891	1	orf19.2294.1	CTA2.3 , , , transcription factor	CTA2.3		transcription factor
orf19.2295_306	8665.06	0.0016897	0.00838029	0.0970466	0.0016897	1.3027	1.3027	FLT up vs GRD	21.43	7.0309	3.53085	1	orf19.2295_306	CTA2 , , , CTA2.5	CTA2		CTA2.5
orf19.2296_1924	260.313	0.755788	0.119813	0.961589	0.755788	1.13746	1.13746	FLT up vs GRD	0.103612	2.49939	0.00246888	1	orf19.2296_1924	, , orf19.9831 | IPF25023.1 | Contig20146:complement(3927..1) , hypothetical protein			hypothetical protein	orf19.9831	IPF25023.1	Contig20146:complement(3927..1)
orf19.2297_699	659.063	0.712323	0.276091	0.146948	0.712323	0.906378	-1.10329	FLT down vs GRD	0.146016	1.55232	2.57914	1	orf19.2297_699	ARL3 , , orf19.9833 | IPF8822.3 | Contig20146:complement(6048..5278) , putative ADP-ribosylation factor in the carboxypeptidase Y pathway	ARL3		putative ADP-ribosylation factor in the carboxypeptidase Y pathway	orf19.9833	IPF8822.3	Contig20146:complement(6048..5278)
orf19.2298_1199	2053.25	8.83e-05	0.043073	0.0701573	8.83e-05	0.485507	-2.0597	FLT down vs GRD	52.5159	3.91514	4.36276	1	orf19.2298_1199	WBP1 , , orf19.9834 | IPF24988.1 | Contig20146:complement(7994..6684) , oligosaccharyl transferase beta subunit precursor	WBP1		oligosaccharyl transferase beta subunit precursor	orf19.9834	IPF24988.1	Contig20146:complement(7994..6684)
orf19.2299_43	1351.31	0.018878	0.0841381	0.262754	0.018878	0.611072	-1.63647	FLT down vs GRD	8.60921	2.95197	1.45125	1	orf19.2299_43	URM1 , , orf19.9835 | IPF25027.1 | Contig20146:8519..8824 , ubiquitin-like protein	URM1		ubiquitin-like protein	orf19.9835	IPF25027.1	Contig20146:8519..8824
orf19.23_469	927.438	0.0635144	0.00642194	0.00174851	0.0635144	0.809833	-1.23482	FLT down vs GRD	4.63382	7.66569	21.1879	1	orf19.23_469	RTA3 , RTA3 , orf19.7694 | IPF27215.1 | Contig20014:13602..14996 , putative transporter or flippase upregulated during the acquisition of azole resistance	RTA3	RTA3	putative transporter or flippase upregulated during the acquisition of azole resistance	orf19.7694	IPF27215.1	Contig20014:13602..14996
orf19.230_1142	420	0.581992	0.154863	0.109524	0.581992	0.836429	-1.19556	FLT down vs GRD	0.329033	2.1917	3.24062	1	orf19.230_1142	, , orf19.7860 | IPF26959.1 | Contig20046:complement(5500..2840) , hypothetical protein			hypothetical protein	orf19.7860	IPF26959.1	Contig20046:complement(5500..2840)
orf19.2301_297	1873.94	0.031049	0.427792	0.00725933	0.031049	1.49956	1.49956	FLT up vs GRD	6.82089	1.10436	12.7681	1	orf19.2301_297	NAS2 , , orf19.9837 | IPF25002.1 | Contig20146:complement(9549..8854) , putative proteasome modulator	NAS2		putative proteasome modulator	orf19.9837	IPF25002.1	Contig20146:complement(9549..8854)
orf19.2302_1356	1324.25	0.00368848	0.287098	0.443902	0.00368848	0.772788	-1.29402	FLT down vs GRD	16.3957	1.51133	0.648564	1	orf19.2302_1356	, , orf19.9838 | IPF24984.1 | Contig20146:complement(11344..9875) , conserved hypothetical protein			conserved hypothetical protein	orf19.9838	IPF24984.1	Contig20146:complement(11344..9875)
orf19.2303_508	278.75	0.0232011	0.901934	0.186968	0.0232011	2.19537	2.19537	FLT up vs GRD	7.83949	0.296228	2.08267	1	orf19.2303_508	, , orf19.9839 | IPF25001.1 | Contig20146:complement(12351..11650) , conserved hypothetical protein			conserved hypothetical protein	orf19.9839	IPF25001.1	Contig20146:complement(12351..11650)
orf19.2304_636	1497.88	0.8379	0.223697	0.527651	0.8379	1.05393	1.05393	FLT up vs GRD	0.0446679	1.77736	0.435911	1	orf19.2304_636	GVP36 , , orf19.9840 | IPF24992.1 | Contig20146:13084..14112 , golgi vesicle protein	GVP36		golgi vesicle protein	orf19.9840	IPF24992.1	Contig20146:13084..14112
orf19.2305_157	1483.88	0.210413	0.928527	0.463038	0.210413	0.683321	-1.46344	FLT down vs GRD	1.8541	0.249589	0.593974	1	orf19.2305_157	GIM4 , , orf19.9841 | IPF25017.1 | Contig20146:14450..14824 , prefoldin subunit 2	GIM4		prefoldin subunit 2	orf19.9841	IPF25017.1	Contig20146:14450..14824
orf19.2306_442	1597.25	0.00333565	0.00490433	0.20476	0.00333565	0.655931	-1.52455	FLT down vs GRD	16.9897	8.35255	1.90592	1	orf19.2306_442	, , orf19.9842 | IPF25007.1 | Contig20146:complement(15456..14920) , conserved hypothetical protein			conserved hypothetical protein	orf19.9842	IPF25007.1	Contig20146:complement(15456..14920)
orf19.2307_1083	532.75	0.295657	0.0414023	0.070399	0.295657	0.87802	-1.13893	FLT down vs GRD	1.25191	3.97688	4.35353	1	orf19.2307_1083	PFS2 , , orf19.9843 | IPF24977.1 | Contig20146:16009..17640 , polyadenylation factor I subunit 2	PFS2		polyadenylation factor I subunit 2	orf19.9843	IPF24977.1	Contig20146:16009..17640
orf19.2308_349	4213.63	0.572252	0.199315	0.947572	0.572252	1.09069	1.09069	FLT up vs GRD	0.346665	1.90429	0.00460332	1	orf19.2308_349	PFK26 , , orf19.9844 | IPF8806.2 | Contig20146:complement(19033..17948) , 6-phosphofructose-2-kinase	PFK26		6-phosphofructose-2-kinase	orf19.9844	IPF8806.2	Contig20146:complement(19033..17948)
orf19.2309.2	15460.4	0.611852	8.2e-05	0.872984	0.611852	1.03277	1.03277	FLT up vs GRD	0.278744	27.0438	0.0272482	1	orf19.2309.2	RPL2B , , orf19.9845.3 | IPF11739.1 | Contig20146:24410..25198 , 60S large subunit ribosomal protein L2B	RPL2B		60S large subunit ribosomal protein L2B	orf19.9845.3	IPF11739.1	Contig20146:24410..25198
orf19.2309_1768	433.25	0.0136416	0.0198026	0.766529	0.0136416	0.640253	-1.56188	FLT down vs GRD	9.90927	5.24125	0.0943773	1	orf19.2309_1768	PET127 , , orf19.9845 | IPF11742.2 | Contig20146:complement(22870..20753) , putative part of mitochondrial translation system	PET127		putative part of mitochondrial translation system	orf19.9845	IPF11742.2	Contig20146:complement(22870..20753)
orf19.231_2224	727.438	0.250294	0.589313	0.49817	0.250294	0.650012	-1.53843	FLT down vs GRD	1.53631	0.782889	0.503386	1	orf19.231_2224	APL2 , , orf19.7861 | IPF15242.2 | Contig20046:6319..8646 , beta-adaptin, large subunit of the clathrin-associated protein (AP-1) complex	APL2		beta-adaptin, large subunit of the clathrin-associated protein (AP-1) complex	orf19.7861	IPF15242.2	Contig20046:6319..8646
orf19.2310.1	27950.5	0.0148892	0.0721248	0.680687	0.0148892	0.760416	-1.31507	FLT down vs GRD	9.54818	3.16065	0.18227	1	orf19.2310.1	RPL29 , , orf19.9846.1 | IPF24965.1 | Contig20146:complement(26943..26752) , ribosomal protein L29	RPL29		ribosomal protein L29	orf19.9846.1	IPF24965.1	Contig20146:complement(26943..26752)
orf19.2310_354	308.063	0.447978	0.45902	0.167133	0.447978	1.16719	1.16719	FLT up vs GRD	0.636601	1.03383	2.30875	1	orf19.2310_354	, , orf19.9846 | IPF24997.1 | Contig20146:complement(26304..25438) , conserved hypothetical protein			conserved hypothetical protein	orf19.9846	IPF24997.1	Contig20146:complement(26304..25438)
orf19.2311_33	5454.88	0.0255513	0.0522489	0.0526185	0.0255513	0.76327	-1.31015	FLT down vs GRD	7.49341	3.62184	5.1679	1	orf19.2311_33	RPL8A , , orf19.9847 | IPF25000.1 | Contig20146:complement(28287..27499) , ribosomal protein L8B	RPL8A		ribosomal protein L8B	orf19.9847	IPF25000.1	Contig20146:complement(28287..27499)
orf19.2312_1780	52.3125	0.916413	0.158903	0.183028	0.916413	0.974052	-1.02664	FLT down vs GRD	0.0117323	2.16171	2.12492	1	orf19.2312_1780	FRE11 , , orf19.9848 | IPF24972.1 | Contig20146:complement(30958..28919) , ferric reductase	FRE11		ferric reductase	orf19.9848	IPF24972.1	Contig20146:complement(30958..28919)
orf19.2313_562	435.313	0.467023	0.653418	0.0926897	0.467023	0.85408	-1.17085	FLT down vs GRD	0.583092	0.676726	3.64386	1	orf19.2313_562	, , orf19.9849 | IPF24990.1 | Contig20146:32675..33865 , conserved hypothetical protein			conserved hypothetical protein	orf19.9849	IPF24990.1	Contig20146:32675..33865
orf19.2314_135	1196	0.324421	0.0243076	0.0278438	0.324421	1.13271	1.13271	FLT up vs GRD	1.1024	4.86712	7.1926	1	orf19.2314_135	, , orf19.9850 | IPF25009.1 | Contig20146:34174..34581 , nucleolar coiled- coil protein			nucleolar coiled- coil protein	orf19.9850	IPF25009.1	Contig20146:34174..34581
orf19.2315_748	447.875	0.394664	0.467569	0.114693	0.394664	1.25097	1.25097	FLT up vs GRD	0.809068	1.01537	3.13277	1	orf19.2315_748	RTG3 , , orf19.9851 | IPF24980.1 | Contig20146:35350..36912 , bHLH/Zip transcription factor	RTG3		bHLH/Zip transcription factor	orf19.9851	IPF24980.1	Contig20146:35350..36912
orf19.2317_146	70.3125	0.812204	0.342974	0.254721	0.812204	0.840865	-1.18925	FLT down vs GRD	0.0603008	1.32769	1.50541	1	orf19.2317_146	, , orf19.9853 | IPF25005.1 | Contig20146:complement(37707..37174) , hypothetical protein			hypothetical protein	orf19.9853	IPF25005.1	Contig20146:complement(37707..37174)
orf19.2318.1	780.625	0.173335	0.0865215	0.163486	0.173335	0.663338	-1.50753	FLT down vs GRD	2.23433	2.91491	2.35427	1	orf19.2318.1	, , orf19.9854.1 | IPF19588.1 | Contig20146:complement(42409..41765) , hypothetical protein, essential			hypothetical protein, essential	orf19.9854.1	IPF19588.1	Contig20146:complement(42409..41765)
orf19.2319_1865	1121.56	0.154987	0.556594	0.112799	0.154987	0.80751	-1.23837	FLT down vs GRD	2.46583	0.840693	3.17154	1	orf19.2319_1865	, , orf19.9855 | IPF18350.2 | Contig20146:complement(41320..39302) , conserved hypothetical protein			conserved hypothetical protein	orf19.9855	IPF18350.2	Contig20146:complement(41320..39302)
orf19.232_427	517.563	0.116242	0.215683	0.239113	0.116242	0.767078	-1.30365	FLT down vs GRD	3.10167	1.8172	1.61789	1	orf19.232_427	MED7 , , orf19.7862 | IPF19038.2 | Contig20046:complement(9520..8765) , RNA polymerase II holoenzyme/mediator subunit	MED7		RNA polymerase II holoenzyme/mediator subunit	orf19.7862	IPF19038.2	Contig20046:complement(9520..8765)
orf19.2320_986	640.313	0.472318	0.216839	0.092433	0.472318	0.847362	-1.18013	FLT down vs GRD	0.568883	1.81134	3.65073	1	orf19.2320_986	RIO1 , , orf19.9856 | IPF24981.1 | Contig20146:42721..44202 , protein serine kinase	RIO1		protein serine kinase	orf19.9856	IPF24981.1	Contig20146:42721..44202
orf19.2322.3	2305.81	0.000215853	0.0172196	0.918708	0.000215853	0.538441	-1.85721	FLT down vs GRD	40.5816	5.50721	0.0110943	1	orf19.2322.3	ERP5 , , orf19.9858.3 | IPF25016.1 | Contig20146:44725..45159 , membrane protein involved in the secetory pathway and membrane trafficking	ERP5		membrane protein involved in the secetory pathway and membrane trafficking	orf19.9858.3	IPF25016.1	Contig20146:44725..45159
orf19.2324_471	151.063	0.988285	0.00909593	0.0273673	0.988285	1.00385	1.00385	FLT up vs GRD	0.000229451	6.84368	7.25249	1	orf19.2324_471	UBA4 , , orf19.9860 | IPF24989.1 | Contig20146:45471..46787 , ubiquitin (URM1) activating enzyme	UBA4		ubiquitin (URM1) activating enzyme	orf19.9860	IPF24989.1	Contig20146:45471..46787
orf19.2325_1225	41.25	0.210778	0.253442	0.629896	0.210778	2.73676	2.73676	FLT up vs GRD	1.85082	1.64291	0.250952	1	orf19.2325_1225	TFC6 , , orf19.9861 | IPF24978.1 | Contig20146:complement(48438..46852) , 91 kDa tau91 subunit of transcription factor IIIC (TFIIIC)	TFC6		91 kDa tau91 subunit of transcription factor IIIC (TFIIIC)	orf19.9861	IPF24978.1	Contig20146:complement(48438..46852)
orf19.2326_1293	594.375	0.933806	0.398349	0.283347	0.933806	0.985718	-1.01449	FLT down vs GRD	0.00734559	1.17599	1.32257	1	orf19.2326_1293	ESC2 , , orf19.9862 | IPF24982.1 | Contig20146:48628..50085 , involved in silencing	ESC2		involved in silencing	orf19.9862	IPF24982.1	Contig20146:48628..50085
orf19.2328_312	1221.06	0.0667447	0.173405	0.0147327	0.0667447	0.71621	-1.39624	FLT down vs GRD	4.49768	2.06115	9.59136	1	orf19.2328_312	, , orf19.9864 | IPF24998.1 | Contig20146:51076..51921 , conserved hypothetical protein			conserved hypothetical protein	orf19.9864	IPF24998.1	Contig20146:51076..51921
orf19.2329.1	17575.3	0.4338	0.02124	0.734482	0.4338	0.915008	-1.09289	FLT down vs GRD	0.679028	5.11126	0.123367	1	orf19.2329.1	RPS17B , , orf19.9865.1 | IPF25018.1 | Contig20146:complement(53928..53686) , ribosomal protein S17.e.B	RPS17B		ribosomal protein S17.e.B	orf19.9865.1	IPF25018.1	Contig20146:complement(53928..53686)
orf19.233.1	1805.81	0.468406	0.0816252	0.780563	0.468406	0.818161	-1.22225	FLT down vs GRD	0.579353	2.99247	0.0830249	1	orf19.233.1	HRT1 , , orf19.7862.1 | IPF19089.2 | Contig20046:10246..10575 , Skp1 Cullin-F-box ubiquitin protein ligase (SCF) subunit	HRT1		Skp1 Cullin-F-box ubiquitin protein ligase (SCF) subunit	orf19.7862.1	IPF19089.2	Contig20046:10246..10575
orf19.2330_1009	629.313	0.0939784	0.0205049	0.0358274	0.0939784	0.760453	-1.31501	FLT down vs GRD	3.60972	5.17632	6.34871	1	orf19.2330_1009	UTP6 , , orf19.9866 | IPF24986.1 | Contig20146:complement(53213..51918) , U3 snoRNP protein	UTP6		U3 snoRNP protein	orf19.9866	IPF24986.1	Contig20146:complement(53213..51918)
orf19.2331_1273	559.813	0.849461	0.093739	0.0925956	0.849461	1.02644	1.02644	FLT up vs GRD	0.038435	2.80986	3.64638	1	orf19.2331_1273	ADA2 , , orf19.9867 | IPF24987.1 | Contig20146:55285..56622 , transcription factor, member of ADA and SAGA complexes	ADA2		transcription factor, member of ADA and SAGA complexes	orf19.9867	IPF24987.1	Contig20146:55285..56622
[truncated: 5,110 more rows]
